# Supplementary material for: Low Concentrations of Vitamin C Reduce the Synthesis of Extracellular Polymers and Destabilize Bacterial Biofilms
Source: Front Microbiol. 2017 Dec 22;8:2599. doi: 10.3389/fmicb.2017.02599 (PMC5748153; doi:10.3389/fmicb.2017.02599)
Supplement: TABLE S1 — List of all identified proteins, proteins belonging to cluster 1, 2, 3, 4 from Figure 3, and regulated proteins. [file Data_Sheet_1.XLSX]

## Sheet: List of all identified proteins
Uniprot Ids	Protein Name	Gene Name	Score	Sequence coverage (%)	LFQ Intensity Control_01	LFQ Intensity Control_02	LFQ Intensity Control_03	LFQ Intensity 10mM_01	LFQ Intensity 10mM_02	LFQ Intensity 10mM_03	LFQ Intensity 20mM_01	LFQ Intensity 20mM_02	LFQ Intensity 20mM_03	LFQ Intensity 30mM_01	LFQ Intensity 30mM_02	LFQ Intensity 30mM_03
C0H3P9	Uncharacterized protein YtzJ	ytzJ	10.538	54	0	0	0	0	0	0	166670000	0	0	412390000	311910000	0
C0H3Q1	Uncharacterized membrane protein YtzI	ytzI	2.8596	27.6	0	0	0	0	0	0	0	0	7287200	0	0	0
C0H3Q6	Uncharacterized protein YbdZ	ybdZ	6.8221	29	0	0	0	0	124870000	0	0	0	0	0	0	0
C0H3R3	Uncharacterized protein YvzF	yvzF	2.2625	21.3	0	0	0	0	0	0	0	0	0	0	0	60411000
C0H3S6	Putative DNA-binding protein YwzG	ywzG	6.2837	10.7	0	0	0	0	0	0	0	0	0	0	0	0
C0H3S9	Uncharacterized HTH-type transcriptional regulator YbzH	ybzH	2.6501	40	126010000	92731000	183080000	97037000	0	0	0	0	0	0	0	0
C0H3V2	Mannitol-specific phosphotransferase enzyme IIA component	mtlF	12.72	9.1	0	0	0	0	0	0	0	0	0	0	0	92405000
C0H3V8	Uncharacterized protein YyzM	yyzM	43.01	73.5	508460000	0	507470000	447280000	320590000	403920000	665430000	619410000	395740000	0	0	481030000
C0H3X4	Probable antitoxin YezG	yezG	3.8896	11.9	0	0	0	198010000	0	0	172220000	0	200070000	0	0	118170000
C0H437;C0H3Z3	Uncharacterized protein YoyH;Uncharacterized protein YjzI	yoyH;yjzI	3.2757	16.9	142040000	0	0	0	0	0	0	0	0	0	0	0
C0H447	Uncharacterized protein YpzJ	ypzJ	173.71	75	1649800000	2077500000	1488600000	1282500000	754850000	0	1273200000	806490000	739600000	0	0	960110000
C0SP78	Uncharacterized transporter YdfM	ydfM	10.263	8.4	0	0	0	0	0	0	0	0	0	0	0	209120000
C0SP85	Uncharacterized protein YukE	yukE	89.064	83.5	1726600000	1178400000	2069000000	2223800000	1788000000	2635000000	2388400000	3032900000	2299300000	3044300000	3261700000	2479000000
C0SP86	DNA translocase SftA	sftA	37.872	14.8	473850000	457190000	535150000	0	0	0	0	0	0	0	158170000	214780000
C0SP89	Putative methyl-accepting chemotaxis protein YoaH	yoaH	11.954	6.2	0	84911000	0	0	0	0	0	0	0	0	0	0
C0SP91	Putative metallo-hydrolase YycJ	yycJ	11.363	21.6	0	0	34528000	0	0	0	0	0	0	0	0	0
C0SP93	Acetyl-coenzyme A carboxylase carboxyl transferase subunit beta	accD	157.26	57.2	10905000000	13882000000	8316500000	7370600000	7028600000	6831000000	6667900000	6544900000	6444600000	6767000000	6176200000	6809300000
C0SP94	Putative ABC transporter substrate-binding lipoprotein YhfQ	yhfQ	205.04	53.9	2797200000	3242300000	4685400000	2130900000	2096900000	2491100000	2129700000	2423100000	2368700000	1514800000	1533100000	2215000000
C0SP95	Copper transport protein YcnJ	ycnJ	115.75	30.1	363800000	0	207680000	1471200000	1438000000	1466500000	2721800000	2018000000	2283300000	1958100000	1435200000	1943200000
C0SPA5	Probable formaldehyde dehydrogenase AdhA	adhA	28.029	17.5	0	0	0	0	0	0	0	0	0	0	166480000	0
C0SPA7	Ftsk domain-containing protein YukB	yukB	244.64	33.6	3933800000	5991700000	2943400000	2147300000	1778200000	1955300000	1958100000	2032000000	1951500000	2017600000	1820900000	1826700000
C0SPB0	Uncharacterized acyl--CoA ligase YtcI	ytcI	94.423	41.6	1504800000	1503200000	1857200000	1199000000	856410000	950430000	1429700000	1291800000	1180800000	1317100000	1130200000	1706300000
C0SPB1	Uncharacterized protein YukJ	yukJ	137.8	56.4	1968900000	1642200000	1013300000	3431900000	3724700000	3458200000	3999300000	3810100000	3861300000	2782900000	3512200000	2810100000
C0SPB4	Uncharacterized ABC transporter ATP-binding protein YhaQ	yhaQ	38.532	25.5	1245200000	1302400000	1175700000	802060000	788270000	853750000	796420000	774440000	753600000	0	755940000	690200000
C0SPC1	Putative phosphotransferase YtmP	ytmP	4.3061	13.7	0	0	0	0	0	0	0	0	0	46698000	0	0
O05216	Uncharacterized transporter YwrB	ywrB	18.644	8.6	0	0	0	0	0	0	0	0	0	0	126640000	0
O05217	Uncharacterized HTH-type transcriptional regulator YwrC	ywrC	23.916	38	0	0	0	637810000	428070000	477590000	953660000	1050400000	911500000	1243000000	885260000	1575400000
O05220	Uncharacterized protein YwrF	ywrF	25.28	42	0	0	0	0	376400000	342540000	0	0	336980000	277200000	442540000	0
O05236	Uncharacterized HTH-type transcriptional regulator YugG	yugG	67.461	44	1046900000	1045800000	1172100000	1773600000	1382600000	2132400000	1813600000	1334400000	1487100000	1812000000	1556400000	1934200000
O05239	Probable NADH-dependent butanol dehydrogenase 1	yugJ	315.08	48.1	6820500000	6310000000	7526600000	10333000000	12268000000	12301000000	12167000000	12034000000	11186000000	10285000000	9848600000	10798000000
O05240	Probable NADH-dependent butanol dehydrogenase 2	yugK	43.646	26.9	1530500000	1677300000	945600000	935950000	889820000	1085500000	982110000	914560000	850570000	1009700000	934590000	981230000
O05243	UPF0047 protein YugU	yugU	126.81	29.5	1308000000	1398200000	913910000	2764100000	2085200000	2274600000	2885600000	2191200000	2047700000	2275000000	1519700000	1557400000
O05248	Putative membrane protease YugP	yugP	3.1982	4	0	304720000	0	0	0	0	0	0	0	0	0	0
O05250	Sensor histidine kinase MalK	malK	24.805	13.7	0	217850000	0	0	0	0	0	0	0	0	0	0
O05251	Transcriptional regulatory protein MalR	malR	42.234	21.7	218760000	209290000	0	202820000	186100000	178480000	182010000	167060000	188730000	295820000	299510000	145270000
O05252	Uncharacterized lipoprotein YufN	yufN	110.39	36.8	989620000	531650000	453030000	554890000	364700000	425720000	0	278910000	0	0	0	0
O05265	Uncharacterized oxidoreductase YulF	yulF	175.79	38.4	836560000	837550000	855220000	1329300000	1230700000	1407700000	1502500000	1463700000	1341900000	1005800000	907630000	1297300000
O05267	NADH dehydrogenase-like protein YumB	yumB	31.495	15.5	0	0	0	0	0	0	90307000	0	0	0	0	0
O05268	Ferredoxin--NADP reductase 2	yumC	323.31	51.2	10839000000	8740500000	12502000000	15019000000	18700000000	17501000000	18012000000	17218000000	17578000000	17317000000	19409000000	16651000000
O05269	GMP reductase	guaC	91.028	41.4	2152000000	2025800000	1918400000	2058300000	2041300000	1951600000	1823200000	1931900000	1889900000	2552800000	2387600000	2001400000
O05389	Uncharacterized oxidoreductase YrbE	yrbE	45.087	31.7	850440000	803430000	726130000	598990000	525480000	627170000	824650000	764190000	642270000	775160000	728000000	711370000
O05392	Holliday junction ATP-dependent DNA helicase RuvA	ruvA	12.26	24.4	0	0	0	0	0	0	0	0	0	0	216480000	0
O05394	Cystathionine gamma-lyase	mccB	66.867	41.2	251150000	520980000	0	635030000	582330000	592080000	850260000	1176400000	946770000	900690000	998810000	964960000
O05396	Uncharacterized protein YrhD	yrhD	3.4564	6.2	0	0	0	0	0	0	0	0	0	19142000	0	0
O05398	Uncharacterized protein YrhF	yrhF	19.582	49.2	762870000	1276300000	732380000	406390000	363570000	375300000	370180000	427800000	447910000	550570000	459380000	484100000
O05405	Uncharacterized protein YrhO	yrhO	4.6469	4.4	0	0	0	0	0	0	0	0	0	0	0	16366000
O05406	Uncharacterized membrane protein YrhP	yrhP	10.191	13.3	57701000	0	0	0	0	0	0	0	0	0	0	0
O05411	Uncharacterized protein YrpD	yrpD	58.884	54	416540000	574810000	0	683750000	507920000	435290000	0	683950000	540420000	368050000	455420000	435920000
O05412	Glutamate racemase 2	yrpC	7.3333	10.9	0	0	0	0	0	0	0	0	0	56689000	0	0
O05413	Probable nitronate monooxygenase	yrpB	18.873	23.6	258320000	0	420480000	0	470800000	469300000	364020000	521760000	581630000	408750000	0	1496700000
O05494	Uncharacterized HTH-type transcriptional regulator YdhC	ydhC	2.6483	19.6	145510000	0	0	0	0	0	0	0	0	0	0	0
O05496	Uncharacterized UDP-glucosyltransferase YdhE	ydhE	323.31	63.3	6285600000	2891000000	6705800000	10691000000	11069000000	11811000000	15703000000	11949000000	14510000000	15707000000	14097000000	13290000000
O05497	Uncharacterized protein YdhF	ydhF	7.3206	21.6	0	106590000	0	0	0	0	0	0	0	0	0	0
O05501	Uncharacterized protein YdhI	ydhI	5.8299	25	0	0	162160000	0	0	0	0	0	0	0	0	0
O05502	Uncharacterized protein YdhJ	ydhJ	2.0284	7.4	0	0	0	0	0	0	0	0	0	0	51517000	0
O05503	Uncharacterized protein YdhK	ydhK	5.9514	11.2	103850000	0	0	0	0	0	0	0	0	0	0	0
O05509	HTH-type transcriptional regulator GmuR	gmuR	6.2754	19.4	0	186780000	0	0	0	0	0	0	0	0	0	0
O05514	Thiamine-monophosphate kinase	thiL	9.6705	18.2	0	107400000	0	0	0	0	0	0	0	0	0	0
O05515	tRNA threonylcarbamoyladenosine biosynthesis protein TsaE	tsaE	56.903	38	254720000	0	616800000	667530000	580310000	0	679430000	432430000	0	0	638190000	400930000
O05516	tRNA threonylcarbamoyladenosine biosynthesis protein TsaB	tsaB	16.603	24	1140600000	904370000	0	512610000	501130000	556840000	544410000	534170000	0	0	0	440580000
O05517	Putative ribosomal-protein-alanine acetyltransferase	rimI	9.4578	22.5	0	83790000	0	0	0	0	0	0	0	0	0	0
O05518	tRNA N6-adenosine threonylcarbamoyltransferase	tsaD	68.691	23.7	1263800000	1138200000	1516800000	723750000	0	614000000	690450000	565740000	651620000	898550000	760330000	707530000
O05519	Uncharacterized ABC transporter ATP-binding protein YdiF	ydiF	36.136	24.9	303340000	0	312700000	0	183060000	207310000	278810000	0	208990000	236680000	296050000	256280000
O05520	Cyclic pyranopterin monophosphate synthase accessory protein	moaC	24.734	40	150900000	208070000	173870000	188390000	166900000	184560000	135910000	118770000	133210000	181990000	153620000	0
O05521	Redox-sensing transcriptional repressor Rex	rex	54.629	59.5	1202100000	1056300000	1568400000	1065400000	1131400000	1151400000	1045000000	917580000	974430000	1143500000	775490000	1074300000
O05523	Sec-independent protein translocase protein TatCy	tatC2	7.8612	4.7	0	0	4664800	0	0	0	0	0	0	0	0	0
O06006	Putative cysteine protease YraA	yraA	256.77	78.7	2433900000	806320000	2366600000	6164500000	8064400000	6793400000	5213100000	5367600000	6228700000	7791400000	8259500000	6735800000
O06473	Multidrug efflux protein YfmO	yfmO	5.6419	2.8	0	504330000	0	0	0	0	0	0	0	0	0	0
O06474	HTH-type transcriptional regulator YfmP	yfmP	10.47	25.7	0	0	0	334850000	0	0	0	0	0	0	0	0
O06475	Uncharacterized protein YfmQ	yfmQ	136.79	62.2	1057000000	2205800000	1250400000	1735700000	1792700000	2147300000	2056300000	1862900000	2164400000	1460600000	1770900000	2179600000
O06476	Uncharacterized ABC transporter ATP-binding protein YfmR	yfmR	251.62	43.6	2756700000	5088400000	2754800000	1312200000	1177600000	1526100000	1482000000	1419600000	1585200000	1373500000	1302400000	1470400000
O06477	Putative sensory transducer protein YfmS	yfmS	259.78	45.5	3942700000	4039400000	5305100000	4310400000	4569500000	4692100000	5646000000	5312300000	5701500000	5041300000	4799600000	4409400000
O06478	Putative aldehyde dehydrogenase YfmT	yfmT	323.31	71.1	23305000000	25450000000	21890000000	17417000000	17041000000	16505000000	20190000000	19853000000	19371000000	22588000000	18827000000	19756000000
O06480	Putative HAD-hydrolase YfnB	yfnB	6.025	16.6	0	0	0	0	0	0	0	0	0	0	27629000	0
O06481	Uncharacterized MFS-type transporter YfnC	yfnC	3.5449	4.4	0	47756000	0	0	0	0	0	0	0	0	0	0
O06490	Uncharacterized protein YetN	yetN	7.945	3.9	68821000	0	43577000	10821000	0	0	0	25643000	0	0	0	0
O06491	Glutamyl-tRNA(Gln) amidotransferase subunit A	gatA	323.31	69.7	15196000000	15959000000	17770000000	14023000000	13410000000	14062000000	14572000000	13706000000	14925000000	17036000000	15145000000	14127000000
O06714	Nuclease SbcCD subunit C	sbcC	35.979	9.3	117510000	239090000	0	0	0	0	0	100480000	135780000	51254000	110310000	0
O06724	Uncharacterized protein YisK	yisK	258.54	67.1	1678900000	1701000000	1946400000	4655000000	5105300000	5092400000	6054200000	5942000000	5539400000	5350200000	5095400000	5204500000
O06728	Putative phytoene/squalene synthase YisP	yisP	31.561	11.2	0	0	0	0	0	0	67657000	0	0	52717000	37878000	59478000
O06733	Uncharacterized protein YisX	yisX	4.0295	12.7	0	0	151380000	0	0	0	0	0	0	0	0	0
O06743	Uncharacterized N-acetyltransferase YitH	yitH	51.797	29.4	0	186710000	236850000	0	0	0	0	127740000	0	0	0	0
O06744	Uncharacterized N-acetyltransferase YitI	yitI	82.307	36.2	790810000	1032200000	1926800000	1217800000	1282400000	1350600000	1640400000	1503700000	1489900000	1588100000	1746700000	1189900000
O06745	Bifunctional homocysteine S-methyltransferase/5,10-methylenetetrahydrofolate reductase;Homocysteine S-methyltransferase;5,10-methylenetetrahydrofolate reductase	yitJ	46.038	17.6	337230000	0	281410000	349730000	430660000	379090000	246730000	340000000	266070000	0	0	0
O06746	UPF0234 protein yitk	yitK	323.31	92.6	9621200000	14262000000	7951000000	13583000000	11689000000	11553000000	12502000000	13738000000	12715000000	8596900000	10984000000	11656000000
O06747	Uncharacterized protein YitL	yitL	48.467	20.1	0	330680000	343130000	0	0	0	0	0	0	0	0	0
O06965	Putative lipoprotein YvcA	yvcA	127.48	52.3	663350000	1267000000	643280000	1098700000	827740000	763480000	854890000	962610000	632650000	921710000	834080000	1050000000
O06966	Putative uncharacterized protein YvcB	yvcB	76.446	31.1	590640000	476320000	617390000	583470000	692860000	727350000	591650000	482050000	585640000	442910000	423850000	476870000
O06967	Multidrug resistance ABC transporter ATP-binding/permease protein BmrA	bmrA	87.785	29.2	429540000	392310000	623250000	443510000	431420000	491370000	522610000	400380000	390470000	493810000	486090000	440310000
O06968	TPR repeat-containing protein YvcD	yvcD	1.5663	2.1	0	116420000	0	0	0	0	0	0	0	0	0	0
O06972	Uncharacterized Nudix hydrolase YvcI	yvcI	55.9	26.6	513020000	610630000	557770000	346670000	319530000	342640000	432100000	447560000	478840000	337410000	441470000	0
O06973	Nucleotide-binding protein YvcJ	yvcJ	191.55	67.1	2858100000	3181100000	3376800000	4519800000	3806200000	3823500000	4208300000	3567500000	4499900000	4898100000	4341400000	4471900000
O06974	Gluconeogenesis factor	mgfK	56.341	30.6	452360000	0	378240000	335770000	237060000	309040000	400700000	286840000	373760000	645600000	683590000	347320000
O06975	Putative sporulation transcription regulator WhiA	whiA	21.058	29.4	246860000	0	198980000	0	257730000	265060000	0	309310000	220070000	0	279040000	336120000
O06976	HPr-like protein Crh	crh	62.537	58.8	584460000	711620000	417750000	1267300000	881220000	804790000	1648400000	1201800000	971440000	1023500000	1450700000	1765400000
O06978	Uncharacterized transcriptional regulatory protein YvcP	yvcP	30.321	11.4	0	901140000	0	0	0	0	0	0	0	0	0	0
O06979	Sensor histidine kinase YvcQ	yvcQ	7.6821	12.6	92126000	0	0	0	0	22251000	0	0	0	0	0	0
O06980	Uncharacterized ABC transporter ATP-binding protein YvcR	yvcR	2.8009	8.5	0	0	33595000	0	0	0	0	0	0	0	0	0
O06986	LOG family protein YvdD	yvdD	65.382	30.4	537160000	273040000	610370000	521840000	528550000	644020000	571470000	453900000	569880000	351890000	0	425000000
O07001	Uncharacterized HTH-type transcriptional regulator YvdT	yvdT	85.851	23.7	646920000	521120000	0	1098600000	1116500000	1191700000	1422600000	923350000	1029500000	1197000000	833180000	755870000
O07006	Phenolic acid decarboxylase PadC	padC	10.351	18	0	0	0	82073000	0	0	0	0	0	0	0	0
O07007	HTH-type transcriptional regulator LutR	lutR	38.606	29.7	0	0	0	0	0	0	0	0	202360000	294480000	0	0
O07008	HTH-type transcriptional regulator GanR	ganR	1.5907	17	0	0	0	163070000	0	0	139910000	0	0	0	0	0
O07012	Beta-galactosidase GanA	ganA	3.0247	4.6	0	0	0	0	36969000	0	0	0	0	0	0	0
O07015	Sigma factor SigB regulation protein RsbQ	rsbQ	7.2531	22.3	0	0	0	0	307360000	0	0	0	229130000	0	237190000	0
O07019	Uncharacterized transcriptional regulatory protein YvfU	yvfU	3.4265	5.5	60529000	0	0	0	0	0	0	0	0	0	0	0
O07020	Lactate utilization protein A	lutA	3.0975	8	0	0	0	0	0	0	0	0	0	0	96893000	0
O07021	Lactate utilization protein B	lutB	73.397	32.8	808070000	946680000	841390000	593960000	0	412610000	831780000	802150000	520760000	830880000	766910000	890450000
O07079	Uncharacterized protein YrdA	yrdA	46.666	47.3	0	0	0	521460000	601280000	749410000	452710000	0	652660000	0	441110000	0
O07081	Uncharacterized isochorismatase family protein YrdC	yrdC	50.586	38	180190000	274610000	129390000	352920000	0	272110000	378520000	388160000	0	414060000	297410000	464510000
O07084	Cadmium, cobalt and zinc/H(+)-K(+) antiporter	czcD	3.7866	2.9	0	0	14825000	0	0	0	0	0	0	0	0	0
O07085	Uncharacterized oxidoreductase CzcO	czcO	8.861	10.1	252700000	0	0	0	0	0	0	0	0	0	0	0
O07513	Protein hit	hit	221.4	72.4	9162900000	9644800000	9159400000	12113000000	11981000000	12706000000	13695000000	12632000000	10971000000	12876000000	12582000000	12148000000
O07516	Uncharacterized membrane protein YhaH	yhaH	233.34	62.7	4663800000	3890500000	5187200000	6838700000	7226500000	6874200000	8624600000	7418200000	7305000000	5932600000	5631100000	7374300000
O07521	3-5 exoribonuclease YhaM	yhaM	152.89	44.9	2822500000	3237500000	2425100000	1589600000	1525900000	1642300000	1824200000	1647700000	1755400000	2079700000	1723600000	2456200000
O07522	Uncharacterized metallophosphoesterase YhaO	yhaO	13.509	10.5	0	62760000	0	0	0	0	0	0	0	0	0	0
O07523	Uncharacterized protein YhaP	yhaP	30.616	8.8	245580000	0	272390000	156630000	203750000	215710000	145520000	181170000	188220000	202700000	170430000	0
O07529	FMN-dependent NADPH-azoreductase	azr	60.099	70.1	2105000000	2661200000	3122400000	2630300000	2833000000	2921400000	2285500000	2457900000	2557000000	2835000000	2172600000	1547300000
O07532	Peptidoglycan endopeptidase LytF	lytF	259.14	40.4	1672400000	2068200000	1251500000	2441700000	2110300000	2058900000	2427500000	2402100000	2308900000	2692500000	2414300000	2269500000
O07533	Putative enoyl-CoA hydratase/isomerase YhaR	yhaR	10.446	12.5	0	0	0	0	0	0	0	0	0	0	53451000	0
O07541	Uncharacterized protein YhaZ	yhaZ	3.8836	18.8	0	0	0	1632100000	1821700000	0	0	0	0	0	0	0
O07543	UPF0754 membrane protein YheB	yheB	16.59	10.1	0	349890000	285870000	0	0	0	0	0	0	0	0	0
O07548	Uncharacterized protein YheG	yheG	39.036	25.2	169320000	0	245170000	212290000	235270000	262220000	195140000	229520000	267100000	230830000	205550000	181230000
O07549	Probable multidrug resistance ABC transporter ATP-binding/permease protein YheH	yheH	2.5337	5.8	0	71015000	0	0	0	0	0	0	0	0	0	0
O07550	Probable multidrug resistance ABC transporter ATP-binding/permease protein YheI	yheI	5.2999	3.8	0	185400000	0	0	0	0	0	0	0	0	0	0
O07552	Stress response protein NhaX	nhaX	3.5746	11.4	268190000	212930000	285780000	0	0	0	157640000	0	0	0	0	0
O07555	Uncharacterized protein YhjA	yhjA	54.155	47.2	1977100000	1533100000	465660000	1066500000	751940000	739040000	743940000	1502000000	798960000	288650000	0	489060000
O07561	Uncharacterized aromatic compound monooxygenase YhjG	yhjG	323.31	79	128750000000	81853000000	130850000000	211980000000	209370000000	221390000000	168070000000	157040000000	166640000000	142670000000	147910000000	146700000000
O07564	Glucose-6-phosphate 3-dehydrogenase	ntdC	16.592	12.9	0	0	0	465930000	761280000	655290000	491540000	810690000	813920000	0	0	86105000
O07565	Kanosamine-6-phosphate phosphatase	ntdB	41.884	22.7	0	0	0	0	726920000	586020000	0	495090000	403710000	0	0	0
O07566	3-oxo-glucose-6-phosphate:glutamate aminotransferase	ntdA	149.5	45.6	0	0	0	1986400000	4156100000	3435900000	1533600000	3257600000	3269200000	413850000	724720000	227690000
O07567	NTD biosynthesis operon regulator NtdR	ntdR	32.028	10.3	0	269330000	0	0	0	0	0	0	0	0	0	0
O07573	HTH-type transcriptional regulator NsrR	nsrR	38.234	39	734790000	348470000	793880000	709880000	781670000	850090000	653050000	682190000	816630000	656130000	508730000	592010000
O07576	Uncharacterized amino acid permease YhdG	yhdG	7.8925	2.8	0	63578000	0	0	0	0	0	0	0	0	0	0
O07581	Probable anti-sigma-M factor YhdL	yhdL	72.741	32.1	567430000	438340000	600880000	426480000	418730000	436450000	504210000	398080000	0	334770000	368050000	341450000
O07584	1-acyl-sn-glycerol-3-phosphate acyltransferase	plsC	104.67	66.3	3634100000	5607100000	4797000000	3235200000	2842700000	3243200000	3338100000	3009100000	3066400000	3280200000	2682500000	2798600000
O07585	UPF0053 protein YhdP	yhdP	8.8044	15.1	0	126840000	0	0	0	0	0	0	0	0	0	0
O07587	Putative aspartate aminotransferase YhdR	yhdR	240.83	64.4	6492200000	5740200000	7404800000	4778200000	4517100000	5044000000	5018600000	4626300000	5054800000	4712100000	5023100000	4921100000
O07595	NAD-dependent protein deacetylase	cobB	30.497	35.2	503460000	816960000	337520000	265030000	260850000	335520000	441050000	413390000	291590000	0	398640000	448450000
O07596	Putative polysaccharide deacetylase YheN	yheN	6.3256	5.3	0	72208000	0	0	0	0	0	0	0	0	0	0
O07597	D-alanine aminotransferase	dat	277.4	72.7	2648200000	6180900000	4071200000	5820200000	6635400000	6708800000	6333600000	4774500000	5601500000	5335900000	6369000000	6055400000
O07598	Putative amidohydrolase YhaA	yhaA	103.31	32.6	587570000	684280000	0	1068500000	1267700000	1207400000	874210000	815930000	1025600000	787640000	828360000	772510000
O07600	3-oxoacyl-[acyl-carrier-protein] synthase 3 protein 2	fabHB	3.905	11.1	0	0	0	0	0	105730000	0	0	0	0	0	0
O07603	Putative aminopeptidase YhfE	yhfE	244.62	52	3662400000	2681400000	3391100000	5007200000	4397200000	4384800000	4527700000	4449000000	3899500000	3609400000	3606100000	3668300000
O07604	Uncharacterized protein YhfF	yhfF	13.539	31.1	0	0	0	360160000	367500000	371060000	332010000	222900000	239980000	302320000	280530000	347730000
O07605	Proton/sodium-glutamate symport protein	gltT	59.35	9.8	492400000	1057500000	745030000	536480000	519100000	505110000	551480000	498020000	395330000	534850000	471420000	573910000
O07607	Probable metallo-hydrolase YhfI	yhfI	71.679	42.6	1625200000	1170000000	1989700000	2629900000	2115000000	1875500000	2218900000	2040200000	1716200000	2421600000	2791300000	1532600000
O07608	Lipoate-protein ligase LplJ	lplJ	134.3	45	1379500000	2905700000	1667300000	1494900000	1216500000	1272900000	1327300000	1032600000	1291000000	2256300000	1924800000	1736700000
O07609	Uncharacterized sugar epimerase YhfK	yhfK	206.96	81.3	2244800000	1086200000	2188300000	2668600000	2186900000	2586400000	3391300000	2677100000	2279400000	3546500000	2936500000	3793800000
O07610	Long-chain-fatty-acid--CoA ligase	lcfB	8.759	4.7	0	17028000	0	0	0	0	0	0	0	0	0	0
O07614	Uncharacterized N-acetyltransferase YhfO	yhfO	52.149	36.9	0	917830000	353690000	0	0	0	0	0	0	0	0	0
O07615	Putative quinone oxidoreductase YhfP	yhfP	47.774	37	980470000	1432500000	735180000	994170000	708600000	779620000	1003900000	1088100000	938310000	817510000	679570000	797680000
O07617	Uncharacterized phosphatase PhoE	phoE	134.92	56.5	1682400000	3390000000	1826100000	2397300000	2079500000	2505400000	2722300000	2061500000	2138100000	2569500000	2340800000	2623600000
O07618	Putative acetyl-CoA C-acetyltransferase YhfS	yhfS	29.768	19.2	0	0	141610000	166980000	0	0	0	110390000	0	0	0	0
O07619	Uncharacterized acyl--CoA ligase YhfT	yhfT	87.136	24.4	1951200000	3438300000	1863100000	692320000	1010000000	1378200000	811910000	705520000	906820000	598240000	683160000	690430000
O07621	Heme-based aerotactic transducer HemAT	hemAT	323.31	41.4	3132600000	5478500000	3215500000	3079600000	3113900000	3063900000	3750100000	3895300000	3583300000	3069800000	2680800000	2720000000
O07624	Uncharacterized beta-barrel protein YwiB	ywiB	93.71	64.1	874830000	571970000	677950000	814050000	474750000	557810000	774540000	578490000	521100000	1195300000	994420000	1084800000
O07631	GTP-binding protein TypA/BipA homolog	typA	323.31	61.3	28593000000	36354000000	25416000000	13765000000	14145000000	14239000000	14171000000	14197000000	13732000000	16478000000	14827000000	18036000000
O07633	Uncharacterized protein YlaI	ylaI	51.643	65.2	0	0	0	304330000	430320000	435890000	0	0	221580000	0	0	0
O07636	Uncharacterized protein YlaL	ylaL	180.53	47.2	1295700000	2070200000	1162600000	591330000	500380000	0	613660000	506250000	476170000	0	0	788210000
O07638	UPF0358 protein YlaN	ylaN	7.805	17.2	172340000	197890000	0	126670000	0	0	131710000	172560000	0	0	0	0
O07906	Uncharacterized HTH-type transcriptional regulator YraN	yraN	11.827	14.9	237410000	0	266560000	0	0	176330000	0	0	0	0	0	0
O07918	Uncharacterized protein YraH	yraH	9.707	9.4	0	0	0	0	22881000	0	0	0	0	0	0	0
O07921	Chitosanase	csn	323.31	76.5	2553200000	2367300000	6584000000	10856000000	11062000000	10073000000	9735500000	14239000000	11064000000	28233000000	25437000000	14088000000
O07934	Uncharacterized protein YraJ	yraJ	1.8019	15.3	0	0	0	0	0	0	0	18009000	0	0	0	0
O07937	Uncharacterized hydrolase YraK	yraK	1.7504	8.5	0	72727000	0	0	0	0	0	0	0	0	0	0
O07939	Uncharacterized protein YisT	yisT	25.795	33.1	229330000	0	0	817030000	890320000	1095200000	960020000	1233200000	961690000	0	711430000	631540000
O08335	HTH-type transcriptional repressor BscR	bscR	5.618	12.9	0	0	0	0	0	0	0	6818200	0	0	0	0
O08336	Probable bifunctional P-450/NADPH-P450 reductase 2;Cytochrome P450 102;NADPH--cytochrome P450 reductase	cypE	60.564	18.7	714640000	914430000	879320000	425890000	0	0	431810000	419020000	397880000	475800000	456220000	335410000
O08455	Uncharacterized protein YhaN	yhaN	2.9226	3.6	0	0	41250000	0	0	0	0	0	0	0	0	0
O30509	Aspartyl/glutamyl-tRNA(Asn/Gln) amidotransferase subunit B	gatB	323.31	59	15946000000	11654000000	15933000000	15151000000	14603000000	14553000000	16819000000	14635000000	15112000000	16154000000	15338000000	15720000000
O31404	Acetoin:2,6-dichlorophenolindophenol oxidoreductase subunit alpha	acoA	62.346	27	576820000	0	0	951880000	1441100000	1092100000	217690000	278090000	215180000	0	0	0
O31414	UPF0213 protein YazA	yazA	1.9301	11.1	0	0	22425000	0	0	0	0	0	0	0	0	0
O31418	Mini-ribonuclease 3	mrnC	3.2669	28	0	0	146820000	0	0	0	0	0	0	0	0	0
O31423	Uncharacterized protein SkfB	skfB	3.1923	2.4	0	0	0	0	61764000	0	0	0	0	0	0	0
O31427	SkfA peptide export ATP-binding protein SkfE	skfE	4.4587	8.4	0	0	0	0	0	0	0	26490000	0	0	0	0
O31429	Uncharacterized protein SkfG	skfG	5.8866	11.7	0	0	142890000	0	0	0	0	0	0	0	0	0
O31436	Uncharacterized protein YbdN	ybdN	24.537	9.1	0	0	0	0	66737000	0	0	0	0	0	0	0
O31441	Uncharacterized protein YbyB	ybyB	10.93	50	0	268920000	0	0	0	0	0	0	0	0	0	0
O31443	Putative HTH-type DNA-binding domain-containing acetyltransferase YbfA	ybfA	22.34	15.4	0	0	140120000	0	0	0	0	0	0	0	0	0
O31446	Uncharacterized protein YbfF	ybfF	27.592	16.5	136530000	215560000	166750000	0	0	0	162150000	166460000	0	176650000	0	146280000
O31447	Uncharacterized protein YbfG	ybfG	38.71	22	293850000	184020000	348770000	340690000	436740000	405440000	245110000	296330000	227510000	238120000	150810000	208330000
O31449	Uncharacterized HTH-type transcriptional regulator YbfI	ybfI	9.2842	25.1	0	0	0	0	224400000	276090000	0	0	0	0	0	0
O31451	Uncharacterized protein YbfJ	ybfJ	2.0756	10.6	0	231930000	0	0	0	0	0	0	0	0	0	0
O31452	Carboxylesterase YbfK	ybfK	5.9746	15.5	0	0	50457000	0	0	0	0	0	0	0	0	0
O31455	Putative hydrolase YbfO	ybfO	323.31	49.8	16847000000	19339000000	12585000000	22226000000	18941000000	18232000000	13618000000	14838000000	11777000000	12312000000	10533000000	11472000000
O31456	Uncharacterized HTH-type transcriptional regulator YbfP	ybfP	9.8786	10.2	0	0	0	0	0	0	0	0	0	0	108130000	0
O31457	UPF0176 protein YbfQ	ybfQ	234.21	65.2	4529900000	5759400000	3584700000	2611200000	2072200000	2215600000	2497800000	2411000000	2258600000	2715000000	2447600000	3721100000
O31458	Probable glucosamine-6-phosphate deaminase 2	gamA	47.036	34.1	639300000	786210000	702530000	748850000	865900000	717860000	647130000	673740000	549560000	589680000	463040000	483910000
O31459	Uncharacterized HTH-type transcriptional regulator YbgA	ybgA	9.0554	8.1	33235000	0	0	0	0	0	0	0	0	0	0	0
O31461	Branched-chain-amino-acid transaminase 1	ilvE	25.723	19.7	281180000	439750000	264320000	0	0	0	0	0	0	219010000	0	119800000
O31463	Homocysteine S-methyltransferase YbgG	ybgG	10.181	11.7	0	0	117770000	0	0	0	0	0	0	0	0	0
O31475	Ferredoxin--NADP reductase 1	ycgT	175.77	43.8	2926400000	3551200000	3393500000	2561700000	2656000000	2678700000	2767400000	3213300000	2998500000	2443800000	2379000000	2628500000
O31484	Uncharacterized protein YczJ	yczJ	6.3226	24.2	0	0	124560000	0	0	0	0	0	0	0	0	0
O31488	Uncharacterized protein YdaN	ydaN	8.7063	3.8	0	32967000	0	0	0	0	0	0	0	0	0	0
O31489	Uncharacterized protein YdcI	ydcI	163.72	32.8	1708100000	2356500000	1755500000	959030000	1061100000	1025900000	1293900000	1177600000	1168600000	1183400000	1077100000	986450000
O31498	DNA ligase	ligA	36.474	17.4	0	0	173250000	170420000	0	0	169310000	209550000	205800000	0	0	130280000
O31500	Uncharacterized HTH-type transcriptional regulator YerO	yerO	7.137	13.5	0	0	0	0	0	0	0	0	0	0	120410000	0
O31501	Swarming motility protein SwrC	swrC	323.31	38.9	7490700000	14174000000	6306600000	4644500000	4900100000	5281600000	6790800000	7131300000	5522900000	5749500000	5651700000	7646100000
O31502	Diacylglycerol kinase	dagK	28.951	40.6	1244900000	726870000	1487300000	1216500000	1210700000	1288200000	1220800000	1166700000	1105500000	983150000	970640000	934570000
O31503	23S rRNA (uracil-C(5))-methyltransferase RlmCD	rlmCD	14.31	13.9	0	359440000	0	0	0	0	0	0	0	0	0	0
O31504	Putative DNA methyltransferase YeeA	yeeA	4.8294	2.7	0	0	41784000	0	0	0	0	0	0	0	0	0
O31506	Putative ribonuclease YeeF	yeeF	173.26	42	1281800000	1639400000	1065300000	481910000	646800000	338310000	414420000	613180000	663960000	472570000	331200000	593010000
O31509	Probable transcriptional regulatory protein YeeI	yeeI	68.452	25.5	2889900000	6191000000	2521500000	1893700000	2214400000	2029400000	1713000000	1609000000	1962100000	3511300000	2469700000	3104900000
O31511	Uncharacterized protein YesE	yesE	10.201	19.7	0	0	0	0	0	0	266210000	0	0	0	0	0
O31512	Uncharacterized oxidoreductase YesF	yesF	7.4603	12.6	0	0	0	0	0	0	299790000	0	0	0	0	0
O31513	Uncharacterized N-acetyltransferase YesJ	yesJ	16.938	34.4	0	0	0	0	0	0	0	0	0	0	231160000	353060000
O31534	Heme-degrading monooxygenase HmoA	hmoA	25.881	61.1	0	0	0	0	2610100000	2827700000	0	0	0	0	0	0
O31535	Uncharacterized protein YetH	yetH	28.091	32.5	1293100000	0	941860000	1719600000	1652600000	1707100000	1159900000	1131100000	1090600000	1867900000	1528600000	0
O31539	Uncharacterized protein YetJ	yetJ	1.952	4.2	4780500	0	0	0	0	0	0	0	0	0	0	0
O31545	Uncharacterized RNA methyltransferase YfjO	yfjO	56.204	26.8	673520000	791730000	729920000	424270000	0	315020000	350880000	369690000	461730000	0	0	408610000
O31546	Probable tRNA-dihydrouridine synthase 2	dus2	13.085	16.3	0	0	0	0	285400000	299000000	0	199390000	167850000	0	0	0
O31550	Dihydrolipoyllysine-residue acetyltransferase component of acetoin cleaving system	acoC	100.09	29.1	616120000	0	0	462890000	474420000	277540000	0	131260000	0	0	0	0
O31555	Uncharacterized lipoprotein YfjD	yfjD	13.521	27	0	0	748240000	0	0	0	0	0	0	643520000	599590000	0
O31556	Uncharacterized protein YfjC	yfjC	17.384	19.2	0	0	0	274760000	303730000	0	0	313730000	362260000	0	0	0
O31557	Uncharacterized protein YfjB	yfjB	6.5292	9.6	0	64409000	0	0	0	0	0	0	0	0	0	0
O31560	Uncharacterized HTH-type transcriptional regulator YfiR	yfiR	5.0837	8.8	0	0	293810000	0	0	0	0	0	0	0	0	0
O31562	Putative metal-dependent hydrolase YfiT	yfiT	115.14	55.1	1127300000	924490000	1195600000	808290000	902970000	801270000	995930000	1230500000	944670000	946710000	1165300000	715590000
O31564	Uncharacterized HTH-type transcriptional regulator YfiV	yfiV	6.7713	20	0	0	0	0	0	31753000	0	0	0	0	0	0
O31567	Probable siderophore-binding lipoprotein YfiY	yfiY	323.31	46.2	7961900000	15906000000	6570800000	6524100000	8321700000	7577200000	6611700000	6245700000	7354100000	3869600000	6201700000	5147500000
O31570	Uncharacterized isomerase YfhB	yfhB	194.79	46.8	2854200000	3621200000	3008000000	2833300000	3281100000	2976700000	2942700000	2563100000	2506600000	2158100000	2438400000	2118400000
O31571	Putative NAD(P)H nitroreductase YfhC	yfhC	254.19	75.8	8888200000	5120200000	7716800000	10389000000	10906000000	10021000000	10267000000	10565000000	11263000000	11796000000	13041000000	10447000000
O31575	Regulatory protein RecX	recX	2.6633	17.4	0	0	11643000	0	0	0	0	0	0	0	0	0
O31579	Uncharacterized protein YfhK	yfhK	8.7159	10.5	0	144240000	0	0	0	0	0	0	0	0	0	0
O31580	Uncharacterized protein YfhL	yfhL	3.7486	9.1	0	14001000	0	0	0	0	0	0	0	0	0	0
O31581	AB hydrolase superfamily protein YfhM	yfhM	77.713	28.3	1608200000	1498100000	1689700000	1456000000	1474100000	1483300000	1291100000	1134900000	1201700000	503420000	388370000	603920000
O31582	Uncharacterized protein YfhO	yfhO	4.0165	6.3	216920000	0	0	0	0	0	0	0	0	0	0	0
O31584	Probable A/G-specific adenine glycosylase YfhQ	yfhQ	10.048	11.1	0	0	37827000	0	0	0	0	0	0	0	0	0
O31588	Uncharacterized protein YhzB	yhzB	11.199	11.6	113220000	0	0	0	0	0	0	0	0	0	0	0
O31590	Putative tRNA (cytidine(34)-2-O)-methyltransferase	cspR	60.916	30.6	625450000	1075500000	664080000	485940000	410610000	457660000	483610000	0	472330000	397220000	314180000	480300000
O31593	Putative efflux system component YhbJ	yhbJ	28.217	31.7	348850000	479570000	442060000	0	404850000	440640000	1015400000	810840000	464110000	455010000	355330000	452680000
O31601	Putative acetyltransferase YjbC	yjbC	8.4848	9.9	0	0	0	0	0	0	0	150220000	0	53224000	0	137160000
O31602	Regulatory protein Spx	spxA	32.485	40.5	0	0	0	0	0	0	0	0	0	0	66248000	0
O31605	Oligoendopeptidase F homolog	yjbG	323.31	46.7	6954500000	11589000000	6352200000	10998000000	11973000000	12470000000	13432000000	12912000000	12707000000	10346000000	10372000000	10725000000
O31607	Group 2 truncated hemoglobin YjbI	yjbI	79.243	43.9	305670000	469710000	135720000	209020000	121640000	111640000	148940000	339980000	156480000	101780000	156450000	214240000
O31609	Putative triphosphatase YjbK	yjbK	14.516	10.5	0	0	286530000	0	0	0	0	0	0	0	0	0
O31610	UPF0738 protein YjbL	yjbL	31.931	21.3	77927000	0	54906000	151220000	172620000	156090000	111140000	135240000	0	0	0	260490000
O31611	GTP pyrophosphokinase YjbM	yjbM	60.272	39.8	847260000	0	780380000	1014400000	1090300000	1157000000	801370000	673640000	1033600000	1101200000	951560000	600680000
O31612	NAD kinase 1	ppnKA	98.784	38.7	2163000000	1937500000	1849800000	1539800000	1362700000	1259800000	1667300000	1556400000	1214000000	988840000	928920000	1582400000
O31616	Glycine oxidase	thiO	154.4	45.5	2678200000	2587300000	2850500000	1702600000	1942100000	2032900000	1542200000	1770500000	1988900000	1378400000	1235400000	1613800000
O31617	Sulfur carrier protein ThiS	thiS	4.4154	13.6	0	39048000	0	0	0	0	0	0	0	0	0	0
O31618	Thiazole synthase	thiG	126.15	56.6	6156900000	7008000000	4858100000	6031100000	5649000000	5245600000	5011200000	4684100000	4001400000	3975700000	3306000000	5094800000
O31619	Sulfur carrier protein ThiS adenylyltransferase	thiF	178.42	48.5	2176700000	2097800000	1409100000	584550000	412250000	440160000	552670000	532100000	357160000	0	0	616720000
O31620	Hydroxymethylpyrimidine/phosphomethylpyrimidine kinase	thiD	323.31	70.8	11584000000	9894500000	10058000000	7566600000	6946800000	7766900000	6030800000	5370400000	5745600000	5826500000	5157100000	5718000000
O31626	Putative ATP-dependent DNA helicase YjcD	yjcD	3.062	7.5	0	0	0	0	0	0	279520000	0	0	0	0	0
O31628	Uncharacterized N-acetyltransferase YjcF	yjcF	23.725	31.4	542390000	446450000	0	0	0	0	0	180130000	0	0	0	0
O31629	Putative phosphoesterase YjcG	yjcG	297.58	83	21849000000	17546000000	21303000000	28354000000	33610000000	35147000000	25963000000	25832000000	30975000000	15875000000	14932000000	19268000000
O31630	Uncharacterized protein YjcH	yjcH	103.35	47.5	677540000	1045700000	578810000	718220000	824070000	801280000	760260000	709270000	734160000	739280000	1237900000	544620000
O31631	Cystathionine gamma-synthase/O-acetylhomoserine (thiol)-lyase	metI	111.95	30	642830000	586100000	707440000	755810000	906030000	954670000	682080000	705030000	676970000	561880000	561630000	559620000
O31632	Cystathionine beta-lyase MetC	metC	41.012	25.1	1013800000	905270000	1080600000	886310000	862350000	916190000	1016800000	983260000	996170000	760780000	708320000	767110000
O31633	Putative ribosomal-protein-alanine acetyltransferase	yjcK	7.5578	13.8	0	0	0	0	0	0	238190000	0	0	0	0	0
O31635	Uncharacterized protein YjcM	yjcM	174.82	25.4	2686200000	5840300000	3008800000	4442300000	4926400000	3921700000	3342500000	2785000000	3669400000	4596100000	4510300000	3538700000
O31636	Uncharacterized protein YjcN	yjcN	17.35	34.9	341700000	384290000	455790000	292700000	0	248940000	238190000	214460000	224510000	0	0	239290000
O31638	Uncharacterized protein YjcP	yjcP	16.305	18	109400000	0	353530000	136600000	0	104040000	230020000	202880000	220230000	82559000	70331000	147940000
O31641	Uncharacterized protein YjcS	yjcS	7.6971	14.3	0	0	0	0	0	0	0	0	0	0	160450000	0
O31642	Uncharacterized oxidoreductase YjdA	yjdA	91.503	45.8	2018300000	2440100000	2347300000	1336400000	1554500000	1497500000	1472200000	1263000000	1675600000	1478300000	987870000	1514200000
O31643	Uncharacterized protein YjdB	yjdB	7.5451	11.3	0	0	0	0	0	0	0	0	68838000	0	0	0
O31648	Uncharacterized N-acetyltransferase YjdG	yjdG	1.6715	14.9	0	0	0	0	2716700	0	0	0	0	0	0	0
O31650	Putative Cys-tRNA(Pro)/Cys-tRNA(Cys) deacylase YjdI	yjdI	6.8272	38.4	0	0	0	0	0	116700000	0	0	0	0	0	0
O31654	RNA polymerase sigma factor SigI	sigI	8.2275	16.3	0	0	22474000	0	0	0	0	0	0	0	0	0
O31655	Anti-sigma-I factor RsgI	rsgI	33.685	11.3	0	0	0	0	38475000	0	0	0	0	0	0	20554000
O31656	Uncharacterized protein YkrK	ykrK	66.223	29.6	296010000	391360000	314380000	366330000	343220000	341360000	403320000	295360000	314290000	368970000	345020000	343070000
O31657	Protease HtpX homolog	htpX	66.079	15.1	560590000	472820000	552980000	592720000	628730000	616570000	610110000	561910000	550640000	443150000	395590000	394420000
O31661	Sporulation kinase E	kinE	24.41	14.1	0	0	0	0	0	101750000	0	0	0	0	0	0
O31664	Hydrolase MtnU	mtnU	3.0124	8.9	0	0	0	0	0	0	0	0	0	0	0	28115000
O31665	Transaminase MtnE	mtnE	55.348	18.3	0	272150000	0	0	0	0	0	0	0	0	0	0
O31666	2,3-diketo-5-methylthiopentyl-1-phosphate enolase	mtnW	22.01	21.5	349140000	0	0	393270000	0	571160000	0	0	0	0	332980000	0
O31667	2-hydroxy-3-keto-5-methylthiopentenyl-1-phosphate phosphatase	mtnX	4.7469	7.2	0	0	49833000	0	0	0	0	0	0	0	0	0
O31668	Methylthioribulose-1-phosphate dehydratase	mtnB	7.3955	37.3	0	0	0	115830000	152450000	0	0	0	0	0	0	0
O31669	Acireductone dioxygenase	mtnD	84.162	32	622450000	385180000	449890000	816550000	501730000	484750000	378320000	623760000	406590000	236280000	296790000	271160000
O31672	HTH-type transcriptional regulator MhqR	mhqR	3.9091	23.4	260900000	450890000	0	0	0	0	0	204440000	160800000	0	0	181860000
O31673	ATP-dependent Clp protease ATP-binding subunit ClpE	clpE	3.7423	9.9	828820000	1178000000	587860000	973930000	819770000	788270000	1135100000	1276500000	1050900000	1167900000	1362700000	1163600000
O31675	7-cyano-7-deazaguanine synthase	queC	56.651	25.6	725180000	782140000	313860000	318060000	412630000	228390000	233300000	276860000	277440000	236690000	0	337830000
O31676	6-carboxy-5,6,7,8-tetrahydropterin synthase	queD	7.9645	15.8	0	794770000	0	0	0	0	0	0	0	0	0	176650000
O31677	7-carboxy-7-deazaguanine synthase	queE	8.6456	12.8	0	0	0	0	0	26364000	0	0	0	0	0	0
O31678	NADPH-dependent 7-cyano-7-deazaguanine reductase	queF	37.704	27.9	249590000	0	205860000	0	0	183000000	0	0	0	0	0	0
O31684	Uncharacterized protein YkvS	ykvS	4.8902	49.2	0	0	808670000	1096200000	949370000	1013700000	0	0	0	836280000	0	1009000000
O31689	Putative dipeptidase YkvY	ykvY	323.31	38	1555300000	2215100000	1231200000	2683800000	2678700000	2639600000	3491300000	3868600000	3078300000	2061600000	2565200000	4001200000
O31690	Uncharacterized HTH-type transcriptional regulator YkvZ	ykvZ	2.8986	7.8	0	0	0	18154000	0	0	0	0	0	0	0	0
O31691	PtsGHI operon antiterminator	glcT	45.847	20.3	0	0	0	0	0	0	0	0	0	0	0	171820000
O31698	CBS domain-containing protein YkuL	ykuL	15.546	31.3	898940000	0	797840000	392690000	228240000	289360000	460740000	684010000	623250000	0	0	0
O31699	Thiol-disulfide oxidoreductase YkuV	ykuV	6.6233	12.8	0	0	55433000	0	0	0	0	0	0	0	0	0
O31702	Molybdopterin-synthase adenylyltransferase	moeB	8.8923	19.5	472410000	749290000	472640000	0	0	0	0	0	0	0	0	0
O31703	Molybdopterin molybdenumtransferase	moeA	28.325	27	459370000	674790000	406820000	410390000	0	0	469890000	417000000	474660000	0	0	352690000
O31705	Molybdopterin synthase catalytic subunit	moaE	2.6864	14	0	0	0	0	107960000	0	0	0	0	0	135060000	0
O31709	Membrane protein YknW	yknW	101.38	22.1	1845700000	3170000000	1897100000	1530300000	1851400000	1942600000	1580900000	1658500000	1916200000	1323600000	1382200000	2157800000
O31710	Putative efflux system component YknX	yknX	140.08	60.5	1471800000	2131400000	1638600000	1332200000	1583500000	1728700000	1445700000	1253400000	1481800000	1352400000	1145900000	1236900000
O31711	Uncharacterized ABC transporter ATP-binding protein YknY	yknY	19.739	27	391020000	478030000	473360000	312320000	299350000	295890000	351670000	287390000	274230000	252000000	0	0
O31712	Uncharacterized ABC transporter permease YknZ	yknZ	16.076	8.8	176840000	331750000	242370000	230890000	0	126140000	202470000	236100000	0	0	263430000	0
O31714	1-phosphofructokinase	fruK	27.588	31	139090000	220820000	0	139500000	93270000	130080000	146200000	200180000	141280000	178410000	129760000	156650000
O31716	Uncharacterized ABC transporter ATP-binding protein YkpA	ykpA	323.31	59.3	19862000000	25885000000	22107000000	13139000000	11845000000	13648000000	14968000000	12531000000	12888000000	15947000000	13273000000	18249000000
O31717	Uncharacterized oxidoreductase YkpB	ykpB	81.692	38	2154000000	1770800000	2021500000	2137300000	2368800000	2356000000	2045000000	2011000000	2136900000	1990800000	1540500000	1643000000
O31718	UPF0356 protein YkzG	ykzG	177.75	43.5	1492900000	0	745180000	3557900000	2923600000	2882500000	3401300000	2661100000	2388400000	3780100000	3892300000	3890100000
O31723	Uncharacterized ABC transporter ATP-binding protein YlmA	ylmA	11.575	12.9	0	0	75735000	0	0	0	0	0	0	0	0	0
O31724	N-formyl-4-amino-5-aminomethyl-2-methylpyrimidine deformylase	ylmB	79.447	27	2270600000	1957200000	1055200000	871440000	717740000	780390000	632330000	841280000	609650000	461530000	0	446670000
O31726	Laccase domain protein YlmD	ylmD	6.815	9.4	0	0	45341000	0	0	0	0	0	0	0	0	0
O31727	UPF0001 protein YlmE	ylmE	139.86	61.7	1368600000	2675400000	1456600000	1558800000	1387900000	1409600000	1545700000	1541200000	1499000000	1642400000	1176900000	1937300000
O31728	Cell division protein SepF	sepF	22.045	34.4	1470200000	1922800000	1327500000	1011600000	1016600000	961920000	862450000	1257800000	920140000	920260000	948810000	1253100000
O31738	UPF0109 protein YlqC	ylqC	9.2783	30.9	0	171340000	0	0	0	0	0	0	0	0	0	0
O31740	Ribosome maturation factor RimM	rimM	68.439	36.8	1291400000	492410000	1077000000	1121100000	1147400000	1244200000	982510000	956330000	1174000000	953320000	1056500000	680150000
O31742	50S ribosomal protein L19	rplS	210.4	82.6	62174000000	66580000000	65512000000	76049000000	70791000000	70567000000	65445000000	64266000000	67099000000	74692000000	65183000000	64303000000
O31743	Ribosome biogenesis GTPase A	rbgA	42.286	47.9	865630000	697130000	1256700000	787760000	815750000	727710000	749150000	622260000	816910000	1045700000	998280000	814460000
O31744	Ribonuclease HII	rnhB	5.3238	3.5	0	158110000	0	0	0	0	0	0	0	0	0	0
O31749	Uridylate kinase	pyrH	78.223	46.7	10453000000	12168000000	7438900000	5839900000	6188900000	5423000000	6264800000	6650000000	5954600000	5698600000	4794600000	6278600000
O31751	Isoprenyl transferase	uppS	47.079	19.2	1091300000	1303900000	797900000	500860000	474560000	375370000	442000000	527230000	0	497670000	486040000	491740000
O31753	1-deoxy-D-xylulose 5-phosphate reductoisomerase	dxr	116.34	54.3	2423500000	1166400000	2503800000	1642100000	1983600000	2053600000	1783600000	1677300000	2024800000	2563300000	2265600000	2047300000
O31754	Regulator of sigma-W protease RasP	rasP	90.707	33.4	848980000	1196300000	1175200000	589200000	837600000	655220000	644810000	733340000	665160000	789360000	609100000	387280000
O31755	Proline--tRNA ligase	proS	323.31	50.7	18228000000	13856000000	21851000000	13169000000	11359000000	12804000000	14227000000	12942000000	13597000000	13657000000	13422000000	14447000000
O31760	Ribonuclease J2	rnjB	323.31	58.7	9488000000	5364800000	8618800000	12193000000	11026000000	10523000000	11618000000	13056000000	11673000000	10115000000	9504400000	9635600000
O31764	Probable inactive metalloprotease YmfF	ymfF	158.6	48.1	1955400000	2624800000	1988200000	2932700000	3342800000	3435900000	3333600000	3256900000	3232600000	2913600000	2732600000	2348000000
O31766	Uncharacterized zinc protease YmfH	ymfH	175.68	42.5	1085200000	1256400000	1141000000	2059800000	2356000000	2362800000	2181300000	2315900000	2325200000	1731300000	1673200000	1843500000
O31767	Uncharacterized oxidoreductase YmfI	ymfI	2.8389	12	111760000	0	0	0	0	0	0	0	0	0	0	0
O31769	Uncharacterized protein YmfK	ymfK	80.368	20.1	664450000	960890000	968650000	621420000	696810000	740260000	243880000	680180000	688280000	309350000	386920000	393320000
O31771	Uncharacterized membrane protein YmfM	ymfM	39.783	28.8	975110000	1118300000	1064500000	624500000	841570000	816730000	833340000	844440000	895780000	557840000	717620000	837990000
O31773	Putative penicillin-binding protein PbpX	pbpX	15.734	18.7	264280000	512310000	0	0	0	0	0	0	0	0	0	0
O31774	Ribonuclease Y	rny	323.31	53.8	7918000000	6345200000	7986800000	7501800000	7895300000	6951500000	7811500000	7120100000	7436800000	6662100000	7176200000	6625500000
O31775	Uncharacterized protein ymdB	ymdB	98.289	16.7	3622600000	2064600000	2312300000	2163200000	3135500000	1980200000	2015800000	2307600000	2227100000	1259600000	1197800000	893300000
O31776	L-threonine 3-dehydrogenase	tdh	66.205	28.5	0	628750000	808790000	542840000	710290000	844150000	828510000	695260000	755790000	635400000	533950000	562580000
O31777	8-amino-7-oxononanoate synthase 1	kbl	260.8	51.3	5062500000	5899100000	5202300000	5167900000	4575700000	4844300000	5380700000	5170000000	5301300000	4445600000	4212700000	4200700000
O31778	tRNA-2-methylthio-N(6)-dimethylallyladenosine synthase	miaB	37.954	27.7	420650000	646220000	429000000	375750000	362870000	306380000	400000000	451720000	283100000	354080000	418720000	527790000
O31779	Uncharacterized protein YmcA	ymcA	128.78	59.4	0	350060000	323670000	514230000	640400000	557750000	544570000	414310000	651310000	479620000	556770000	382080000
O31782	Polyketide synthase PksN	pksN	323.31	25.8	1886700000	3249000000	2265400000	2407400000	2466700000	2737200000	3068200000	3318200000	3193300000	3153800000	2716000000	2796600000
O31784	Polyketide synthase PksR	pksR	195.34	20.4	899800000	976860000	857510000	566200000	865320000	811260000	1095900000	1346700000	960380000	714090000	718960000	1046600000
O31785	Polyketide biosynthesis cytochrome P450 PksS	pksS	139.91	46.4	993110000	1714100000	598100000	1435100000	1839300000	1883600000	2467200000	2197200000	1774500000	1405900000	1705100000	1530900000
O31787	Uncharacterized protein YmaE	ymaE	27.957	23.4	624250000	772600000	479070000	767540000	815340000	682720000	602880000	800770000	625850000	0	0	524130000
O31790	Uncharacterized protein YmaD	ymaD	53.391	46	231480000	0	0	619900000	507140000	368580000	507880000	515110000	619200000	456860000	513440000	726060000
O31795	tRNA dimethylallyltransferase	miaA	16.729	19.4	265480000	588930000	0	0	0	0	0	0	0	0	0	0
O31796	RNA-binding protein Hfq	hfq	67.24	64.4	3655100000	4001400000	3969000000	5963400000	7393200000	9329500000	5733700000	5343900000	7895700000	2031900000	2439000000	3841600000
O31798	Uncharacterized protein YmzA	ymzA	2.4745	11.8	0	0	353690000	0	0	0	0	0	0	0	0	0
O31800	UPF0457 protein YnzG	ynzG	3.0415	12	0	0	134150000	0	0	0	0	0	0	0	0	0
O31801	Probable deoxyuridine 5-triphosphate nucleotidohydrolase YncF	yncF	73.545	58.3	937920000	0	0	2738600000	2737600000	3041300000	2430500000	2146400000	2543600000	2552200000	2431200000	2107400000
O31803	Uncharacterized protein YncM	yncM	66.76	47.2	199630000	319820000	0	326130000	249500000	217830000	255810000	293230000	346300000	311000000	208020000	198970000
O31804	Sec-independent protein translocase protein TatAc	tatAc	2.9755	27.4	0	0	6395500	0	0	0	0	0	0	0	0	0
O31806	Uncharacterized protein YndB	yndB	96.184	77.8	885340000	1307200000	957530000	773280000	715370000	779220000	665050000	569240000	715540000	537790000	0	961820000
O31820	Thioredoxin-like protein YneN	yneN	9.4969	14.1	48166000	0	0	0	0	0	0	0	0	0	0	0
O31822	Probable UTP--glucose-1-phosphate uridylyltransferase YngB	yngB	3.4689	21.2	0	0	0	0	0	0	70997000	0	0	0	0	0
O31823	Uncharacterized membrane protein YngC	yngC	7.4179	10.6	243940000	0	239320000	0	0	0	0	331850000	0	0	0	0
O31827	Plipastatin synthase subunit E;ATP-dependent isoleucine adenylase	ppsE	323.31	32.3	5294900000	6517500000	4907400000	5321200000	5731000000	5866900000	6608400000	6339500000	6614400000	5904800000	5196100000	5665200000
O31844	HTH-type transcriptional repressor CzrA	czrA	21.212	29	0	0	0	269920000	324300000	299370000	0	0	0	0	230910000	0
O31845	Uncharacterized membrane protein YozB	yozB	5.0198	9.6	0	0	54169000	0	0	0	0	0	77958000	0	114320000	141020000
O31847	Uncharacterized protein YozO	yozO	23.325	24.6	745900000	0	543190000	876070000	645810000	760160000	733660000	625410000	587010000	0	0	646420000
O31848	Uncharacterized protein YozC	yozC	8.3981	50.7	0	0	0	376640000	704940000	682980000	0	0	0	682630000	811170000	0
O31850	Uncharacterized protein YojN	yojN	55.726	25	857290000	612350000	566660000	427110000	399370000	0	397270000	356660000	0	0	0	375890000
O31852	D-gamma-glutamyl-meso-diaminopimelic acid endopeptidase CwlS	cwlS	247.85	47.1	7511600000	8516200000	5038500000	8082300000	7562900000	8509100000	7304700000	8237900000	6870300000	5519400000	5323300000	7100500000
O31853	Uncharacterized UDP-glucosyltransferase YojK	yojK	85.59	38	290410000	440370000	0	821460000	1754000000	1391300000	1474900000	1982200000	1718400000	714680000	1996500000	1688200000
O31856	RsbT co-antagonist protein RsbRC	rsbRC	11.403	13.8	0	131260000	0	0	0	0	0	0	0	0	0	0
O31857	Probable N-acetyl-alpha-D-glucosaminyl L-malate deacetylase 2	bshB2	160.4	33	2075200000	1473200000	2446900000	2478500000	2387300000	2407200000	2501900000	2769800000	2726700000	2847400000	3295600000	2086100000
O31858	Uncharacterized protein YojF	yojF	25.785	24.1	0	0	0	444960000	448090000	466750000	382960000	424190000	387640000	462810000	511080000	379460000
O31911	SPBc2 prophage-derived uncharacterized protein YorB	yorB	3.784	24.5	0	0	0	0	0	0	1820800	0	0	0	0	0
O31928	SPBc2 prophage-derived uncharacterized protein YopJ	yopJ	12.038	39.1	0	0	0	0	179560000	0	0	0	0	0	0	0
O31929	SPBc2 prophage-derived uncharacterized protein YopI	yopI	2.0602	5.1	0	0	0	52425000	0	0	0	0	0	0	0	0
O31930	SPBc2 prophage-derived uncharacterized protein YopH	yopH	4.0662	18	0	0	0	0	0	0	0	0	0	73920000	0	0
O31935	SPBc2 prophage-derived uncharacterized protein YopC	yopC	12.794	6.1	117010000	0	0	0	0	0	0	0	0	0	0	0
O31937	SPBc2 prophage-derived uncharacterized protein YopA	yopA	5.5921	8.9	48138000	0	0	0	71978000	86252000	74690000	0	0	107760000	64015000	0
O31942	SPBc2 prophage-derived uncharacterized lipoprotein YonS	yonS	19.586	38.4	992710000	1562200000	1012600000	0	0	0	0	487570000	0	0	622940000	0
O31949	SPBc2 prophage-derived uncharacterized protein YonI	yonI	5.9585	20.6	0	0	0	0	0	0	0	0	0	0	29782000	0
O31953	SPBc2 prophage-derived uncharacterized protein YonE	yonE	1.9149	6.5	0	0	0	0	0	0	0	0	0	174410000	0	0
O31973;P96657	SPBc2 prophage-derived uncharacterized protein YomL;Uncharacterized protein YddT	yomL;yddT	22.14	25.4	499530000	637130000	501110000	453960000	0	426660000	374940000	339720000	0	489850000	434750000	381390000
O31974	SPBc2 prophage-derived uncharacterized protein YomK	yomK	18.613	23.6	2209100000	0	2503200000	983960000	1847700000	1612100000	1014300000	1192500000	1038500000	0	0	523830000
O31975	SPBc2 prophage-derived uncharacterized membrane protein YomJ	yomJ	7.8035	10.6	0	0	342540000	0	0	0	0	0	0	0	0	0
O31986	SPBc2 prophage-derived glycosyltransferase SunS	sunS	323.31	46.4	11073000000	12667000000	9126500000	8053400000	8218900000	8811100000	8719700000	7886800000	8682200000	7871200000	8501400000	7965600000
O31989	SPBc2 prophage-derived uncharacterized protein YolF	yolF	173.42	61	9795200000	23302000000	8485500000	8516700000	8709600000	8845300000	8829800000	7875300000	8439600000	9341200000	8215500000	9743000000
O31995	SPBc2 prophage-derived uncharacterized N-acetyltransferase YokL	yokL	30.163	26	219590000	0	0	270820000	319510000	0	0	300090000	0	268890000	258760000	0
O31997	Antitoxin YokJ	yokJ	12.051	20	0	467220000	0	265890000	420010000	304210000	0	414520000	334740000	0	0	290880000
O31998	Probable ribonuclease YokI	yokI	46.203	21.9	318940000	537210000	278130000	160660000	225490000	193060000	250070000	173290000	193980000	188190000	140000000	228400000
O32000	SPBc2 prophage-derived pesticidal crystal protein-like YokG	yokG	258.79	47.3	3158100000	5003700000	4396900000	4500200000	4779100000	5465900000	5053200000	4534800000	4930900000	3277800000	3704500000	3262600000
O32001	SPBc2 prophage-derived endonuclease YokF	yokF	168.17	46.3	880070000	796510000	843610000	561450000	659930000	605920000	625490000	738690000	744100000	499740000	681610000	695330000
O32002	SPBc2 prophage-derived uncharacterized protein YokE	yokE	15.845	51.9	0	0	0	0	0	0	0	0	0	116170000	0	0
O32003	SPBc2 prophage-derived aminoglycoside N(3)-acetyltransferase-like protein YokD	yokD	84.895	36.4	885090000	1439700000	857110000	1337400000	1314000000	1259100000	1114100000	1039500000	1241000000	1311000000	1079300000	1021600000
O32006	Resolvase homolog YokA	yokA	9.1757	7.3	0	0	40997000	0	0	0	0	0	0	0	0	0
O32022	Uncharacterized protein YqzD	yqzD	106.92	47.9	563130000	0	629370000	814350000	1118000000	1042100000	1234800000	1035000000	1327500000	1366800000	1412100000	1261300000
O32023	Uncharacterized protein YqzC	yqzC	136.16	61.7	3507300000	7338200000	2160500000	2956500000	2909500000	2855700000	2693800000	3264600000	3209100000	2069500000	2872600000	3893500000
O32028	5-methylthioadenosine/S-adenosylhomocysteine nucleosidase	mtnN	166.17	47.2	4697500000	2292700000	4863900000	3152000000	2621400000	2627200000	4405200000	3233500000	2535200000	3989300000	3473700000	3675000000
O32030	Uncharacterized protein YrzA	yrzA	11.143	50.7	0	0	0	0	0	0	0	0	0	0	110560000	0
O32031	Uncharacterized membrane protein YrrS	yrrS	60.277	27	75580000	136080000	29980000	63403000	71060000	55105000	93848000	176710000	79104000	28600000	67795000	100740000
O32033	Uridine kinase	udk	14.658	25.1	647950000	0	711270000	0	129050000	172900000	0	0	143010000	0	191370000	0
O32034	Uncharacterized protease YrrO	yrrO	110.46	41.7	2080600000	2575700000	2266900000	1097500000	717480000	672420000	929470000	764450000	803040000	981010000	649450000	974300000
O32035	Uncharacterized protease YrrN	yrrN	56.061	20.4	1137300000	948690000	926110000	465660000	324570000	480000000	490660000	462990000	375180000	541700000	424750000	373660000
O32036	Putative O-methyltransferase YrrM	yrrM	12.884	24.4	0	50173000	0	0	0	0	0	0	0	0	0	0
O32037	tRNA threonylcarbamoyladenosine dehydratase	tcdA	54.669	35.4	483610000	0	367900000	423230000	324620000	275190000	349180000	350050000	321520000	376710000	394860000	384140000
O32038	Aspartate--tRNA(Asp/Asn) ligase	aspS	323.31	61.5	22122000000	24190000000	24147000000	15305000000	14124000000	15138000000	16697000000	16371000000	15942000000	16703000000	16302000000	18267000000
O32039	Histidine--tRNA ligase	hisS	215.97	65.1	3892200000	6485200000	4858300000	2698400000	3009000000	2997300000	3436700000	3083500000	3281900000	3688900000	3981800000	3727000000
O32041	Putative N-acetylmuramoyl-L-alanine amidase YrvJ	yrvJ	16.373	16.8	0	0	0	0	0	0	0	0	0	0	0	82277000
O32044	Single-stranded-DNA-specific exonuclease RecJ	recJ	46.501	14.2	368630000	473200000	369580000	217600000	0	245290000	363050000	295170000	267890000	236750000	253040000	214160000
O32047	Protein translocase subunit SecDF	secDF	323.31	35.5	11820000000	18347000000	12487000000	9726100000	9267700000	10061000000	11014000000	10515000000	10058000000	10881000000	10531000000	12271000000
O32049	Post-transcriptional regulator ComN	comN	1.6278	14.3	0	0	53178000	0	0	0	0	0	0	0	0	0
O32052	UPF0092 membrane protein YrbF	yrbF	72.652	48.3	751680000	0	0	879160000	954380000	859480000	811990000	0	769940000	574180000	1029200000	849510000
O32053	Queuine tRNA-ribosyltransferase	tgt	88.745	43.8	1895000000	1731400000	1749300000	1715300000	2119200000	2040400000	1586000000	2021600000	1821800000	2228500000	2042900000	1647300000
O32054	S-adenosylmethionine:tRNA ribosyltransferase-isomerase	queA	146.68	45.6	3061200000	3558100000	3909700000	2983600000	2558500000	2738100000	2841600000	2340500000	2509300000	2966200000	2908100000	2715900000
O32055	Holliday junction ATP-dependent DNA helicase RuvB	ruvB	24.185	12	207850000	0	0	0	0	0	0	0	0	0	0	0
O32060	Putative sodium/proton-dependent alanine carrier protein YrbD	yrbD	3.1798	2.1	0	237980000	0	0	0	0	0	0	0	0	0	0
O32065	Uncharacterized protein YtzB	ytzB	48.008	65.7	1535500000	994850000	1109600000	1218700000	1457800000	1845900000	1200900000	911570000	1258100000	1085300000	1136100000	1350400000
O32068	Uncharacterized RNA pseudouridine synthase YtzG	ytzG	21.941	16.7	78572000	0	0	0	0	0	0	0	0	0	0	0
O32072	Uncharacterized protein YtwF	ytwF	32.497	56.3	0	0	394670000	778730000	466830000	0	643290000	633230000	0	508700000	589750000	611090000
O32075	Uncharacterized N-acetyltransferase YuaI	yuaI	23.823	26.6	292140000	0	436880000	455290000	439790000	487930000	0	296110000	0	0	0	0
O32076	Uncharacterized protein YuaG	yuaG	323.31	68.8	14263000000	13314000000	10904000000	7703200000	8745500000	9340700000	6525600000	7496000000	7095500000	2920700000	3266100000	3246600000
O32078	Uncharacterized protein YuaE	yuaE	103.89	48.1	1814600000	1973400000	2690900000	2473200000	2855100000	3302900000	2792600000	2041400000	2505600000	3100800000	4769900000	2745300000
O32082	Uncharacterized membrane protein YubF	yubF	66.742	26.4	0	1263200000	0	0	0	0	0	0	0	0	0	0
O32083	Exo-glucosaminidase LytG	lytG	18.67	11.3	0	108350000	0	0	0	0	0	0	0	0	0	0
O32086	UPF0118 membrane protein YubA	yubA	40.035	22.2	287750000	297600000	338610000	0	0	0	0	0	0	261400000	313860000	352050000
O32087	Uncharacterized membrane protein YuzA	yuzA	9.1516	14.1	0	0	0	0	0	0	0	0	0	0	0	0
O32090	Nicotinate phosphoribosyltransferase	pncB	240.57	62	9650000000	12103000000	9599300000	5509700000	4799000000	4777700000	5318600000	5352400000	5710400000	6886000000	5690400000	7116600000
O32091	Uncharacterized isochorismatase family protein PncA	pncA	10.761	23	0	0	0	0	0	0	0	0	0	0	0	218430000
O32092	Uncharacterized protein YueI	yueI	2.5497	9.1	0	0	0	0	12443000	0	0	0	0	0	0	0
O32093	Uncharacterized protein YueH	yueH	29.248	42.7	0	0	0	0	0	0	0	0	0	351890000	396140000	0
O32095	UPF0118 membrane protein YueF	yueF	9.1056	4.9	0	0	0	0	0	0	0	0	0	0	0	52705000
O32099	Benzil reductase ((S)-benzoin forming)	yueD	56.469	39.5	1602500000	2633300000	2139400000	816050000	709960000	1065200000	950390000	1003100000	1070800000	1139400000	822440000	876400000
O32101	Bacteriophage SPP1 adsorption protein YueB	yueB	283.61	31.7	2403600000	2633500000	1641500000	1810100000	1619300000	1683600000	2042300000	2095700000	1680300000	1931300000	1731600000	1814300000
O32102	Ferri-bacillibactin esterase BesA	besA	108.94	49.8	2133900000	1221500000	4214900000	2035600000	2447900000	2326100000	2386000000	1655600000	2176500000	2215200000	2341700000	2201600000
O32106	Probable cytosol aminopeptidase	pepA	323.31	47.2	3062100000	4179600000	1704400000	4617700000	4338700000	4192200000	4875100000	4767800000	4127100000	3456800000	3676900000	4521400000
O32107	Uncharacterized membrane protein YuiD	yuiD	14.536	18.4	0	0	0	0	0	0	68557000	0	0	0	33764000	71283000
O32113	Uncharacterized protein SufA	sufA	88.166	55	163020000	0	209170000	272830000	223240000	225780000	269750000	228540000	0	261180000	367290000	340740000
O32114	Diaminopimelate epimerase	dapF	200.9	15.5	1695400000	1886100000	1396700000	597900000	0	682640000	524410000	584540000	0	0	0	576310000
O32117	NADH dehydrogenase-like protein YutJ	yutJ	78.274	42.5	2447700000	5531500000	1901700000	1828200000	2240600000	2054800000	2006200000	1710100000	2034300000	2426400000	2080200000	2059000000
O32119	Putative nitrogen fixation protein YutI	yutI	85.796	53.2	3968300000	3634600000	4667300000	3648600000	3264300000	3273900000	2573300000	2759800000	2185400000	0	0	3685500000
O32125	Uncharacterized hydrolase YutF	yutF	183.76	32.4	1330000000	1411700000	1161600000	2025900000	2240400000	2599500000	1101600000	885720000	2147100000	1918700000	1425900000	1088100000
O32126	UPF0331 protein YutE	yutE	101.9	38.2	1156900000	0	1324600000	2042700000	1819100000	1712700000	2141100000	1631300000	1412100000	885060000	1414000000	1824200000
O32127	Uncharacterized protein YutD	yutD	6.7691	12.1	0	0	0	0	193030000	0	0	0	222000000	211870000	270370000	274460000
O32129	Lipoyl synthase	lipA	259.36	60.1	1879200000	3399900000	1636600000	1140200000	1079100000	868070000	1485900000	2058500000	1361500000	1672400000	1844400000	1760000000
O32133	Uncharacterized metallophosphoesterase YunD	yunD	24.19	10.4	0	220730000	0	0	0	0	0	0	0	0	0	0
O32135	UPF0759 protein YunF	yunF	2.8916	21.3	0	15608000	0	0	0	0	0	0	0	0	0	0
O32138	Purine catabolism regulatory protein	pucR	43.747	6.6	134930000	0	0	0	0	0	0	0	0	0	0	0
O32140	Uric acid permease PucK	pucK	1.7894	2.6	0	0	0	0	0	0	0	0	0	0	22987000	0
O32141	Uric acid degradation bifunctional protein PucL;2-oxo-4-hydroxy-4-carboxy-5-ureidoimidazoline decarboxylase;Uricase	pucL	2.8715	7.1	51887000	0	0	0	0	0	0	0	0	0	0	0
O32144	Probable xanthine dehydrogenase subunit D	pucD	2.5208	1.2	0	0	0	0	0	0	0	0	0	0	0	49857000
O32148	Purine catabolism protein PucG	pucG	1.8568	6.2	0	95996000	0	0	0	0	0	0	0	0	0	0
O32152	Uncharacterized HTH-type transcriptional regulator YurK	yurK	4.6012	15.3	0	77821000	0	0	0	0	0	0	0	0	0	0
O32157	Fructosamine deglycase FrlB	frlB	87.985	31.7	473350000	525090000	626670000	326460000	602270000	556680000	0	537380000	0	0	0	0
O32158	Uncharacterized protein YurQ	yurQ	7.5217	27.4	0	0	0	0	0	0	0	214410000	0	0	0	316350000
O32159	Uncharacterized oxidoreductase YurR	yurR	13.839	19.6	0	654330000	0	0	0	0	0	0	0	0	0	0
O32161	Uncharacterized protein YurT	yurT	95.575	55.9	950290000	0	1314300000	4260000000	3481100000	3917200000	3097900000	2386200000	2888300000	2989300000	3092000000	1531600000
O32162	FeS cluster assembly protein SufB	sufB	256	45.8	11687000000	8638600000	11020000000	9417900000	9685300000	9921300000	9766700000	10636000000	9403100000	9608300000	7611100000	9082100000
O32163	Zinc-dependent sulfurtransferase SufU	sufU	70.364	74.1	570770000	814280000	870880000	383980000	545120000	433620000	466550000	372250000	419290000	613220000	448690000	504500000
O32164	Cysteine desulfurase SufS	sufS	323.31	58.6	4728000000	4906100000	4077700000	4712400000	4793600000	4587900000	5160000000	5005700000	5198600000	6176800000	5455800000	5283700000
O32165	FeS cluster assembly protein SufD	sufD	323.31	76.7	7474000000	10806000000	7948100000	6650700000	9255400000	8952900000	8586600000	8999200000	8807900000	8160400000	8303600000	9604800000
O32167	Methionine-binding lipoprotein MetQ	metQ	125.51	54.4	1766800000	1948000000	2983500000	3590300000	3913000000	4031400000	3295900000	2501300000	3606200000	2300500000	2511600000	3031000000
O32168	Methionine import system permease protein MetP	metP	7.6854	11.3	0	0	0	0	0	0	0	0	0	0	0	125040000
O32169	Methionine import ATP-binding protein MetN	metN	84.696	30.2	669010000	1445600000	1128500000	494820000	412730000	562490000	427750000	369200000	477480000	588270000	408510000	489540000
O32174	Glycine cleavage system H protein	gcvH	48.453	41.7	601010000	1889400000	1258900000	2422800000	1464500000	1803300000	1579200000	1252400000	1497900000	1061900000	1963100000	1779300000
O32175	Uncharacterized protein YusI	yusI	56.558	61.9	0	479680000	0	905470000	949920000	666080000	0	1111100000	1002200000	623110000	1926000000	875670000
O32176	Probable acyl-CoA dehydrogenase	fadE	122.28	37.9	2043500000	1898300000	1302900000	2285700000	3634000000	2848100000	1839600000	1606800000	1724100000	885420000	824810000	780740000
O32177	3-ketoacyl-CoA thiolase	fadA	16.326	18.2	0	0	0	0	136080000	123390000	0	0	0	0	0	0
O32178	Probable 3-hydroxyacyl-CoA dehydrogenase	fadN	52.476	25	178280000	0	0	239160000	432570000	283290000	174330000	134590000	157710000	0	0	0
O32181	Uncharacterized HTH-type transcriptional regulator YusO	yusO	178.71	58.7	2584600000	3537300000	1658500000	2417700000	3116900000	2503400000	2686900000	3411300000	2878100000	1607700000	2743700000	2100600000
O32182	Uncharacterized MFS-type transporter YusP	yusP	35.144	12.4	600080000	0	924290000	753510000	924030000	852620000	818850000	721040000	666040000	804090000	1169600000	590780000
O32186	Uncharacterized HTH-type transcriptional regulator YusT	yusT	10.44	8.5	129090000	102360000	100570000	0	0	0	0	90548000	0	0	0	0
O32188	Probable siderophore transport system ATP-binding protein YusV	yusV	53.851	34.2	1457400000	2980700000	2355700000	675670000	803540000	792160000	922410000	805100000	980740000	0	0	657910000
O32192	Transcriptional regulatory protein CssR	cssR	5.2693	7.1	0	333020000	0	0	0	0	0	0	0	0	0	0
O32193	Sensor histidine kinase CssS	cssS	4.3273	7.3	0	0	0	1794400000	0	0	0	2083200000	0	0	1287700000	0
O32204	Putative arginine/ornithine antiporter	yvsH	2.451	2.1	0	0	169710000	0	0	0	0	0	0	0	0	0
O32207	Uncharacterized protein YvgK	yvgK	2.3322	4.2	0	0	0	0	0	0	0	0	0	186840000	0	0
O32208	Putative ABC transporter substrate-binding lipoprotein YvgL	yvgL	255.57	86.2	4488600000	3360500000	6705300000	5572400000	7199700000	6610400000	4911100000	4725600000	5830700000	3781700000	4105100000	5543600000
O32210	Glyoxal reductase	yvgN	323.31	71.7	13977000000	10529000000	11186000000	23304000000	20352000000	19529000000	23058000000	23919000000	20010000000	22143000000	22344000000	27299000000
O32213	Sulfite reductase [NADPH] hemoprotein beta-component	cysI	246	51	2442600000	2789200000	1770400000	1569100000	1618200000	1699100000	1939800000	1900300000	1595700000	2001300000	1656900000	1882800000
O32214	Sulfite reductase [NADPH] flavoprotein alpha-component	cysJ	181.02	30.7	942450000	492500000	695260000	1380200000	1506800000	1245900000	1648200000	1583100000	1316200000	1622700000	1469900000	1589400000
O32218	Disulfide bond formation protein D	bdbD	136.44	68.9	6266100000	2962300000	7363300000	6997400000	8183100000	8166400000	8357300000	7515800000	8732600000	6149800000	6802300000	4806200000
O32219	Cadmium, zinc and cobalt-transporting ATPase	cadA	172.59	30.6	3561200000	4000400000	3118200000	2087900000	1732300000	1668500000	1570900000	1634100000	1576900000	2069900000	1875900000	2253700000
O32220	Copper-exporting P-type ATPase A	copA	21.977	6.9	0	242830000	133920000	118220000	0	120460000	99204000	143630000	0	0	0	0
O32222	Copper-sensing transcriptional repressor CsoR	csoR	21.95	34.7	102700000	0	0	0	0	0	0	0	0	0	0	0
O32223	scyllo-inositol 2-dehydrogenase (NADP(+))	iolW	323.31	46.9	11552000000	7600200000	10950000000	8580000000	10271000000	9654700000	7248800000	7388600000	6998300000	7592900000	8015500000	6468700000
O32224	FMN-dependent NADH-azoreductase 2	azoR2	154.71	64.9	7686800000	6044400000	6553800000	17066000000	12148000000	13909000000	13948000000	14319000000	10830000000	10905000000	9527900000	9969400000
O32229	Uncharacterized oxidoreductase YvaG	yvaG	26.492	33.7	0	0	0	303860000	306090000	0	0	0	0	255520000	0	0
O32230	SsrA-binding protein	smpB	16.736	34	334950000	401700000	320730000	286050000	282800000	325580000	297540000	308960000	356570000	0	0	207710000
O32231	Ribonuclease R	rnr	77.559	35.7	1121700000	1417900000	1008600000	835510000	875590000	678550000	747630000	1225000000	944330000	432470000	636240000	620100000
O32232	Carboxylesterase	est	111.13	63.8	3594000000	2757000000	2962200000	2554400000	2791400000	2737900000	2909000000	2521100000	2447100000	3187000000	3059200000	2538800000
O32233	Probable protein-export membrane protein SecG	secG	8.3266	23.7	0	70889000	0	0	0	0	0	0	0	0	0	0
O32236	HTH-type transcriptional repressor RghR	rghR	10.538	34.1	0	0	0	0	0	0	0	0	0	0	0	105100000
O32238	Uncharacterized HTH-type transcriptional regulator YvaP	yvaP	7.5869	31.5	149380000	0	0	0	0	0	0	0	0	0	0	0
O32241	Immunity protein SdpI	sdpI	10.203	5.8	0	0	0	238800000	329490000	343880000	0	0	183130000	164040000	167320000	156510000
O32243	Glycine betaine/carnitine/choline-binding protein OpuCC	opuCC	8.5602	6.6	0	52087000	0	0	0	0	0	0	0	0	0	0
O32245	Uncharacterized protein YvbH	yvbH	6.1115	16.7	0	233520000	0	0	98820000	145050000	0	0	143230000	0	0	0
O32246	Uncharacterized protein YvbI	yvbI	31.657	25	7722500000	7861700000	3842000000	2770500000	4159800000	3060800000	2726800000	2864100000	2991700000	0	0	1751500000
O32247	Uncharacterized membrane protein YvbJ	yvbJ	120.36	40.7	348260000	483600000	435800000	303760000	259790000	361100000	321940000	451090000	399610000	225880000	222600000	335300000
O32248	Uncharacterized N-acetyltransferase YvbK	yvbK	97.51	47.7	1102300000	0	1737400000	1306100000	1743900000	1667800000	1185000000	1093700000	1554900000	1370800000	1450800000	921040000
O32253	Central glycolytic genes regulator	cggR	61.687	30.3	363330000	384950000	448890000	141350000	221020000	311320000	322030000	123600000	285330000	0	407050000	0
O32254	Uncharacterized protein YvbT	yvbT	9.1498	8.9	0	0	0	0	0	0	0	0	0	0	13347000	0
O32257	Uncharacterized amino acid permease YvbW	yvbW	13.026	5.1	149430000	161000000	0	0	0	0	0	0	0	0	0	0
O32258	Uncharacterized glycosylase YvbX	yvbX	15.294	20.9	224370000	0	0	463280000	494720000	389570000	0	410820000	504390000	359550000	0	0
O32259	Lactate utilization protein C	lutC	70.222	31.7	610150000	528170000	716800000	380530000	329930000	360610000	581720000	366140000	362940000	698470000	496930000	664910000
O32264	Probable 2-ketogluconate reductase	yvcT	223.86	58.5	5002100000	5368900000	4803300000	4766000000	4859500000	5194100000	4331600000	5430000000	4795700000	3989400000	3778300000	3205700000
O32265	Uncharacterized protein YvzA	yvzA	45.899	42	461240000	364390000	571590000	466530000	271900000	345520000	330890000	525880000	0	0	0	269760000
O32266	Swarming motility protein SwrAA	swrAA	5.9605	17.1	0	0	9201500	0	0	0	0	0	0	0	0	0
O32267	Putative teichuronic acid biosynthesis glycosyltransferase TuaH	tuaH	20.407	11.3	0	103390000	0	0	0	0	0	0	0	0	0	0
O32269	Teichuronic acid biosynthesis protein TuaF	tuaF	70.958	30.5	814990000	1382400000	1068300000	0	0	0	0	0	0	0	0	0
O32271	UDP-glucose 6-dehydrogenase TuaD	tuaD	262.5	56.2	6901300000	11396000000	7130300000	298320000	563310000	634280000	0	0	0	0	0	0
O32272	Putative teichuronic acid biosynthesis glycosyltransferase TuaC	tuaC	89.057	21.6	785380000	1405000000	716140000	0	0	0	0	0	0	0	0	0
O32273	Teichuronic acid biosynthesis protein TuaB	tuaB	1.5608	3.3	487780000	680360000	0	0	0	0	0	0	0	0	0	0
O32274	Putative undecaprenyl-phosphate N-acetylgalactosaminyl 1-phosphate transferase	tuaA	3.3202	14.5	0	108120000	0	0	0	0	0	0	0	0	0	0
O32283	Uncharacterized protein YxzF	yxzF	4.3721	19.2	0	0	72780000	0	0	0	0	0	0	0	0	0
O32293	Uncharacterized N-acetyltransferase YycN	yycN	15.114	21.2	82476000	0	142980000	96825000	0	0	85845000	104310000	0	80718000	0	0
O32294	Response regulator aspartate phosphatase G	rapG	48.469	18.4	562580000	862520000	805740000	552800000	324850000	424660000	543560000	473650000	268080000	660350000	428300000	503480000
O34303	Type-2 restriction enzyme BsuMI component YdjA	ydjA	12.239	9.5	237740000	0	0	0	181460000	0	0	0	0	0	0	0
O34305	Uncharacterized protein YtoQ	ytoQ	58.879	45.3	1019000000	1323700000	878410000	1132000000	1361400000	1441600000	1262700000	1414100000	1452300000	1055500000	979010000	1199600000
O34307	Uncharacterized MFS-type transporter YvmA	yvmA	95.51	14.1	2508000000	4061500000	2300600000	5984400000	3735800000	4513900000	3998200000	3630800000	3965800000	4744200000	6416700000	6700100000
O34308	Putative oxidoreductase YtkK	ytkK	10.866	13.7	195020000	268660000	0	0	162540000	107260000	196430000	214910000	194280000	0	147740000	79009000
O34309	Putative phosphoenolpyruvate synthase	pps	45.961	11.2	56664000	0	0	0	48555000	0	0	0	0	0	0	0
O34313	Trifunctional nucleotide phosphoesterase protein YfkN;2,3-cyclic-nucleotide 2-phosphodiesterase/3-nucleotidase;5-nucleotidase	yfkN	323.31	56.4	9960800000	6223900000	9031600000	36052000000	31956000000	31672000000	28007000000	27522000000	25294000000	19595000000	21019000000	21253000000
O34318	Uncharacterized protein YloU	yloU	40.522	19.2	1252100000	975130000	892960000	2401700000	2021100000	1416600000	2228900000	3677700000	2193700000	1029600000	1974500000	2294400000
O34320	Uncharacterized protein FadG	fadG	2.6226	8.2	0	0	67045000	0	0	0	0	0	0	0	0	0
O34324	Dihydrolipoyl dehydrogenase	acoL	53.627	18.1	0	0	0	0	252050000	0	0	0	0	0	0	0
O34325	Uncharacterized protein YtrP	ytrP	5.6363	2.2	0	0	0	0	0	0	0	0	0	0	0	0
O34327	Response regulator aspartate phosphatase J	rapJ	5.353	24.1	0	0	0	0	0	0	0	0	0	73184000	0	0
O34328	Guanylate kinase	gmk	103.18	31.9	1235000000	1958700000	1498500000	1951200000	1708400000	1723500000	1974500000	1876800000	1774600000	2214400000	1890700000	1507800000
O34331	Putative rRNA methyltransferase YlbH	ylbH	23.214	20.7	407530000	0	223490000	109900000	54981000	54462000	118260000	208120000	161950000	52144000	0	88830000
O34334	Uncharacterized protein YjoA	yjoA	147.48	68.2	2674600000	2916800000	3418100000	4793000000	3840400000	4991900000	6570300000	5974900000	5822800000	2356200000	2398800000	6558200000
O34340	3-oxoacyl-[acyl-carrier-protein] synthase 2	fabF	323.31	82.1	5636400000	7819800000	4593200000	6519800000	7517100000	6846700000	7697900000	7844200000	7782400000	7724100000	6765600000	7574900000
O34347	Argininosuccinate synthase	argG	49.821	18.9	461530000	0	0	808560000	1441600000	1156500000	470880000	852520000	462970000	0	221440000	0
O34348	Fe(3+)-citrate-binding protein YfmC	yfmC	227.47	65.7	5424900000	8102200000	4229800000	2528300000	2815700000	2120600000	2824200000	5530700000	3267200000	1474000000	2000200000	2865300000
O34351	Cyclo(L-leucyl-L-leucyl) synthase	yvmC	236.32	53.2	6026700000	10327000000	9691200000	17122000000	14813000000	15698000000	14530000000	11152000000	16216000000	22877000000	25951000000	17492000000
O34353	Uncharacterized protein YdjN	ydjN	130.77	40.8	695230000	968060000	657380000	558240000	590720000	577880000	513320000	622310000	508560000	411370000	465090000	539650000
O34355	Putative amidohydrolase YtcJ	ytcJ	31.777	34.2	0	0	43559000	0	0	0	0	0	0	0	0	0
O34357	Thioredoxin-like protein YtpP	ytpP	72.764	26.2	2949400000	647090000	2285200000	3310000000	2805700000	3000200000	2286300000	2714800000	2306000000	1332500000	1458700000	2715900000
O34358	Serine protease Do-like HtrA	htrA	122.84	36.1	325100000	595510000	360320000	0	340310000	279260000	351240000	378180000	234630000	299050000	367020000	414400000
O34362	Putative HMP/thiamine import ATP-binding protein YkoD	ykoD	53.46	17.4	1340800000	1583800000	1252000000	512240000	441340000	434800000	359160000	385460000	348460000	359900000	284140000	267550000
O34365	Uncharacterized protein YtmB	ytmB	115.83	77.5	1549200000	840950000	1538400000	1965600000	2018300000	2125300000	1701000000	1768200000	1765700000	1538800000	1969900000	1625900000
O34366	Putative flagellin YvzB	yvzB	1.7672	28.1	0	0	0	0	0	0	0	0	52625000	0	0	0
O34374	Putative cytochrome P450 YjiB	yjiB	12.594	23.5	0	0	0	0	0	0	0	0	0	145730000	180040000	206940000
O34375	Cell division topological determinant MinJ	minJ	11.475	10.6	268300000	0	0	0	0	0	0	0	0	0	0	0
O34377	Uncharacterized protein YobM	yobM	12.739	10.8	0	0	0	0	228740000	0	0	0	0	0	0	0
O34380	Uncharacterized protein YbcI	ybcI	5.9288	25	0	0	0	0	0	0	0	0	0	21485000	0	0
O34383	Uncharacterized sodium-dependent transporter YocR	yocR	2.1425	1.8	0	0	98826000	0	0	0	0	0	0	0	0	0
O34384	Uncharacterized protein YceE	yceE	162.72	49	2711400000	1884200000	2820400000	4958400000	4772100000	5536900000	4538200000	4316300000	4182800000	1104400000	708160000	3839900000
O34391	N-acetylmuramoyl-L-alanine amidase XlyB	xlyB	131.34	40.7	1256000000	1177500000	716990000	768750000	755040000	649190000	717370000	897700000	726420000	667090000	494820000	697370000
O34392	ABC transporter ATP-binding protein YtrE	ytrE	38.093	15.6	510330000	0	680720000	418360000	492540000	402870000	319730000	250930000	432110000	0	380980000	312970000
O34394	Uncharacterized protein YjjA	yjjA	133.59	50.4	1742400000	1157700000	1595200000	1284400000	787880000	1225400000	1363400000	1175700000	1205000000	1638800000	1611400000	1112300000
O34399	Glutamate synthase [NADPH] small chain	gltB	185.37	46.5	2011900000	2351400000	2124800000	737400000	713270000	781460000	718520000	881630000	734720000	816640000	232120000	876770000
O34400	Putative protein YfkA	yfkA	33.197	23.1	480390000	413410000	323810000	0	0	0	0	0	0	182820000	201960000	0
O34403	Formamidopyrimidine-DNA glycosylase	mutM	12.937	36.2	0	0	0	0	0	0	0	0	0	116570000	93297000	161500000
O34412	Regulatory protein YlbF	ylbF	3.383	6.7	0	19964000	0	0	0	0	0	0	0	0	0	0
O34418	Uncharacterized protein YfkI	yfkI	3.7019	21.7	0	49835000	0	0	0	0	0	0	0	0	0	0
O34424	Uncharacterized membrane protein YteJ	yteJ	10.245	6.1	0	228700000	0	0	0	0	0	0	0	0	0	0
O34425	Glyceraldehyde-3-phosphate dehydrogenase 2	gapB	132.9	41.5	1328200000	1191400000	662060000	2385400000	1786800000	1874300000	1531100000	1743400000	1267500000	799870000	921170000	819010000
O34426	S-adenosylmethionine decarboxylase proenzyme;S-adenosylmethionine decarboxylase beta chain;S-adenosylmethionine decarboxylase alpha chain	speH	1.5819	11.9	0	0	0	0	0	76225000	0	0	0	0	0	0
O34428	Uncharacterized protein YjlA	yjlA	1.8168	3.4	0	17413000	0	0	0	0	0	0	0	0	0	0
O34431	Calcium-transporting ATPase	yloB	1.8799	0.8	0	140170000	0	0	0	0	0	0	0	0	0	0
O34433	Putative phage-related protein YobO	yobO	83.897	14.5	125730000	0	0	282420000	277170000	167400000	285640000	0	200770000	138310000	0	0
O34434	Uncharacterized protein YdjG	ydjG	52.65	31.4	594620000	1090200000	715310000	357360000	466860000	435060000	292240000	0	236890000	529800000	0	165620000
O34436	Probable low-affinity inorganic phosphate transporter	pit	3.6787	9	0	0	0	0	0	0	0	110010000	0	0	0	0
O34441	UPF0701 protein YloC	yloC	18.193	20.6	0	0	0	0	0	171220000	0	0	0	0	0	0
O34442	Magnesium transporter MgtE	mgtE	204.33	31.3	9802500000	12136000000	8638500000	7540900000	7314400000	7273900000	5952200000	5262000000	7296300000	8658000000	8758300000	7145400000
O34443	Adenine phosphoribosyltransferase	apt	84.301	57.6	3477500000	5409200000	2236700000	2204000000	1506200000	1967300000	2593100000	2270900000	1724300000	2597900000	2977900000	2618000000
O34445	Uncharacterized protein YlbN	ylbN	19.244	36	1758800000	1852300000	1737800000	976420000	1012200000	1253900000	1050900000	0	1044700000	1165500000	1547700000	1455200000
O34448	SPBc2 prophage-derived uncharacterized protein YopQ	yopQ	66.891	34.3	732350000	870530000	644140000	0	531940000	1168100000	629380000	515120000	679280000	837360000	556740000	561680000
O34450	N-acetylglucosamine-6-phosphate deacetylase	nagA	210.53	39.9	1360100000	809520000	1434500000	1020100000	1207800000	1191800000	1321200000	1207500000	1363200000	1380700000	1544700000	1206400000
O34452	TPR repeat-containing protein YrrB	yrrB	3.081	3.9	0	0	86114000	0	0	0	0	0	0	0	0	0
O34453	Nitric oxide synthase oxygenase	nos	4.0758	8.3	0	0	0	75954000	0	0	0	0	0	0	0	0
O34454	UPF0111 protein YkaA	ykaA	288.82	53.7	5794600000	4617300000	9604400000	9410600000	9893800000	9977800000	8507600000	7919100000	8363700000	10165000000	9549100000	6827000000
O34457	Molybdenum cofactor biosynthesis protein B	moaB	104.28	52.9	889220000	1381200000	638540000	959320000	1123400000	1236000000	959200000	918210000	1163200000	1230300000	1604700000	857760000
O34459	ATP phosphoribosyltransferase regulatory subunit	hisZ	1.5522	2	0	261890000	0	0	0	0	0	0	0	0	0	0
O34468	Uncharacterized N-acetyltransferase YlbP	ylbP	19.895	40.6	746450000	854040000	893460000	611610000	694670000	611560000	468960000	640600000	0	0	0	655250000
O34469	Putative ATP-dependent helicase YeeB	yeeB	23.888	24.2	286820000	517510000	301810000	302590000	0	0	0	325390000	0	327890000	337880000	0
O34470	Uncharacterized protein YlbL	ylbL	10.931	27.9	0	0	868940000	688940000	462380000	475440000	577920000	0	406080000	296540000	432480000	0
O34471	Uncharacterized protein YtlQ	ytlQ	86.698	38.2	638780000	494420000	395920000	232610000	114880000	88711000	118110000	198420000	184930000	126990000	131310000	226930000
O34474	Probable multidrug resistance protein YoeA	yoeA	33.8	2.8	388130000	987090000	0	0	0	0	551720000	590460000	506660000	344100000	411190000	0
O34475	Putative NAD(P)H nitroreductase YfkO	yfkO	64.764	54.8	1541600000	816170000	923160000	1815900000	1729700000	1679300000	1975700000	2244700000	2171400000	2996500000	2644500000	1637300000
O34476	Probable cysteine synthase	ytkP	74.78	42.4	1483000000	1605900000	1093600000	1216700000	954410000	868290000	1215200000	1171500000	901300000	1055700000	1066400000	1189600000
O34478	Uncharacterized protein YccF	yccF	30.277	19.8	775290000	1890600000	0	0	0	0	0	0	248440000	0	0	0
O34481	ATP-dependent RecD-like DNA helicase	yrrC	25.546	13.8	0	280420000	0	0	0	0	0	0	0	0	0	0
O34482	L-asparaginase 2	ansZ	2.752	13.9	144070000	0	0	0	0	0	0	0	0	0	0	0
O34483	HPr kinase/phosphorylase	hprK	175.85	41.3	2372000000	2921500000	2639400000	1920400000	1991000000	1830800000	1907300000	1974800000	1827800000	1595600000	1546900000	1800800000
O34484	Methionine aminopeptidase 2	mapB	135.84	71.1	6166000000	6783100000	4990300000	5335500000	5910000000	6038300000	6001500000	6758600000	5891700000	4767900000	5427200000	4670700000
O34496	UPF0354 protein YtpQ	ytpQ	30.009	27.5	243760000	258090000	306820000	198430000	168580000	161070000	239960000	164120000	172820000	255340000	187720000	257200000
O34497	Uncharacterized protein YkgA	ykgA	9.8138	17.8	133180000	231700000	0	67866000	64157000	68950000	0	0	50298000	0	0	63670000
O34499	6-phosphogluconolactonase	pgl	323.31	53.3	20301000000	12962000000	22674000000	24631000000	26933000000	26261000000	30492000000	22771000000	23424000000	23644000000	24697000000	29969000000
O34507	Serine/threonine-protein kinase PrkC	prkC	90.077	11.3	205300000	269030000	189510000	121160000	125680000	82960000	138500000	206800000	155240000	89563000	152670000	178860000
O34510	Fe(3+)-citrate import ATP-binding protein YfmF	yfmF	45.606	18.4	446190000	431380000	314820000	0	0	0	0	0	177910000	0	0	166540000
O34512	Uncharacterized ABC transporter ATP-binding protein YfmM	yfmM	172.41	34.6	1842800000	2459100000	2372500000	1098400000	1143100000	1219100000	1222200000	840730000	1114900000	947190000	1077300000	1155300000
O34513	UPF0348 protein YlbM	ylbM	4.9611	6.3	0	159230000	0	0	0	0	0	0	0	0	0	0
O34514	o-succinylbenzoate synthase	menC	43.751	23.7	576130000	867630000	680830000	0	0	0	0	0	0	0	0	203270000
O34521	PTS system N-acetylglucosamine-specific EIICB component;N-acetylglucosamine permease IIC component;N-acetylglucosamine-specific phosphotransferase enzyme IIB component	nagP	106.81	15	2019700000	1759100000	1909400000	1403200000	1265400000	1343100000	1461500000	1236100000	878210000	0	1156100000	756050000
O34522	tRNA (guanine-N(7)-)-methyltransferase	trmB	47.802	41.8	931360000	939540000	574200000	704750000	695240000	577890000	618100000	768330000	536720000	787000000	876720000	702360000
O34525	Putative signal peptide peptidase SppA	sppA	114.13	35.8	10864000000	11358000000	9631800000	6342200000	5841800000	6408600000	6656800000	6265500000	6209800000	4614700000	4745500000	5340400000
O34526	Alanine--tRNA ligase	alaS	323.31	46.1	10411000000	17776000000	9685900000	8730000000	8826000000	8400600000	9572300000	8808700000	9421800000	8542800000	7641600000	8929000000
O34527	HTH-type transcriptional regulator CymR	cymR	104.15	45.7	680150000	0	1469400000	771710000	1374300000	1348100000	985490000	838840000	1370300000	1186200000	1543800000	701410000
O34528	Uncharacterized AAA domain-containing protein YrvN	yrvN	21.874	20.7	166080000	386960000	228440000	101590000	0	162030000	97718000	0	0	0	0	0
O34529	ATP-dependent 6-phosphofructokinase	pfkA	323.31	45.8	17484000000	32950000000	18744000000	14158000000	16365000000	15410000000	15980000000	14540000000	15881000000	23564000000	22920000000	16636000000
O34530	Putative ribosome biogenesis GTPase RsgA	rsgA	20.216	8.7	0	0	82211000	0	0	0	0	0	0	0	0	0
O34533	Uncharacterized HTH-type transcriptional regulator YtcD	ytcD	12.405	52.4	111630000	0	0	0	0	0	0	0	0	0	0	0
O34536	Uncharacterized N-acetyltransferase YfmK	yfmK	27.236	25.7	413310000	0	374860000	500380000	430920000	591620000	689530000	446660000	0	0	0	337140000
O34538	Uncharacterized lipoprotein YcdA	ycdA	323.31	81.4	14137000000	14310000000	14571000000	21648000000	22379000000	23919000000	24384000000	19665000000	18485000000	19286000000	19273000000	22018000000
O34539	Uncharacterized UDP-glucosyltransferase YjiC	yjiC	132.41	27.8	662690000	199750000	826990000	1606200000	2406800000	2189500000	2365300000	2721500000	2621700000	1358600000	1182000000	1646700000
O34542	Uncharacterized protein YflK	yflK	12.027	13.6	25196000	0	0	0	0	0	0	0	0	0	0	0
O34543	Putative ring-cleaving dioxygenase MhqE	mhqE	6.7657	6.3	0	11574000	0	0	0	0	0	0	0	0	0	0
O34553	Protein YtsP	ytsP	39.055	49.7	0	0	791100000	975420000	1077900000	1206500000	847910000	868260000	914020000	0	0	996410000
O34557	Ribulose-phosphate 3-epimerase	rpe	26.715	31.3	419860000	503630000	554990000	429070000	458750000	506910000	425900000	0	489860000	0	0	303460000
O34558	SPBc2 prophage-derived uncharacterized protein YopR	yopR	30.457	28	232620000	134340000	156280000	0	218170000	139230000	0	191800000	186660000	0	0	0
O34564	Thioredoxin-like protein YkuU	ykuU	38.664	28.3	833560000	0	916210000	1896200000	2114200000	1834000000	1589400000	1929400000	1580900000	0	1180100000	1165300000
O34569	Uncharacterized N-acetyltransferase YoaA	yoaA	10.116	27.7	0	0	0	0	0	0	0	95549000	0	0	0	0
O34572	Putative HMP/thiamine permease protein YkoC	ykoC	8.718	4.3	0	0	156350000	0	0	0	0	0	0	0	0	0
O34577	Probable adenylyl-sulfate kinase	cysC	16.918	28.9	0	0	0	0	0	0	237370000	182810000	0	441560000	400970000	343670000
O34580	ATP-dependent DNA helicase PcrA	pcrA	215.86	41.5	1591600000	2820400000	1758200000	783980000	607660000	603720000	843530000	873520000	759710000	951670000	787940000	988260000
O34586	Uncharacterized membrane protein YlbC	ylbC	42.917	13	316700000	322710000	208240000	0	210580000	196130000	0	234170000	194290000	0	0	0
O34588	Uncharacterized protein YkuJ	ykuJ	98.271	64.6	5105800000	7586200000	5518100000	2820300000	2865800000	3122700000	2489800000	2679600000	2372900000	3271900000	2980700000	2932900000
O34589	Probable flavodoxin-2	ykuP	106.7	42.4	836340000	860900000	1038100000	1653600000	1349100000	1750800000	944550000	1189100000	1467500000	869970000	828100000	838160000
O34591	Acetoin:2,6-dichlorophenolindophenol oxidoreductase subunit beta	acoB	189.57	45.3	3180000000	1709900000	883910000	3776300000	6515200000	4537900000	774010000	1053700000	1063700000	0	0	0
O34592	AB hydrolase superfamily protein YdjP	ydjP	19.614	15.5	0	0	862290000	649890000	625990000	735080000	506140000	507320000	582720000	761220000	490100000	495570000
O34593	Uncharacterized protein YjqA	yjqA	17.643	28	0	720790000	677430000	0	424560000	524050000	301600000	397710000	333830000	299390000	304560000	401270000
O34594	Cytochrome c-551	cccB	7.5956	11.6	0	0	332740000	0	0	0	0	0	0	0	0	0
O34595	Probable tRNA sulfurtransferase	thiI	6.773	18	0	0	0	0	0	0	0	134890000	0	0	0	0
O34596	Antitoxin YobK	yobK	79.598	48	0	0	260910000	526370000	762810000	662860000	497390000	551010000	489010000	0	0	308230000
O34599	Putative cysteine desulfurase IscS 1	iscS1	73.416	42.2	541310000	1148200000	672080000	384270000	362610000	322110000	540300000	505250000	495380000	499980000	468820000	575590000
O34600	Bifunctional oligoribonuclease and PAP phosphatase NrnA	nrnA	13.633	16.9	287420000	0	0	0	0	0	0	0	0	202110000	266690000	0
O34607	Probable L-serine dehydratase, alpha chain	sdaAA	37.465	34	277510000	498760000	0	0	570690000	403060000	0	404770000	409230000	0	392560000	0
O34617	Probable dual-specificity RNA methyltransferase RlmN	rlmN	37.965	19	1171500000	1236600000	1400000000	621200000	568920000	554470000	519060000	518580000	546690000	587370000	506060000	479770000
O34618	Uncharacterized amino acid permease YtnA	ytnA	13.895	7.8	483730000	572930000	476720000	146800000	190340000	277430000	0	0	175510000	102330000	177350000	459040000
O34621	Uncharacterized protein YcdB	ycdB	4.8699	7.2	0	0	0	0	0	0	0	0	0	0	202440000	573210000
O34623	DNA polymerase III subunit alpha	dnaE	7.3491	7.1	0	113930000	0	0	0	0	0	0	0	0	0	0
O34627	Blue-light photoreceptor	pfyP	51.904	39.1	278250000	338050000	225670000	346100000	365370000	0	224250000	365390000	317160000	263080000	280060000	0
O34628	Uncharacterized protein YvlB	yvlB	145.56	49.6	3490300000	3741000000	2586300000	2103100000	2355900000	2053000000	1849700000	2394400000	2179500000	1236900000	1711100000	1814400000
O34629	Uncharacterized lipoprotein YerH	yerH	20.886	18.4	247690000	0	328060000	0	220350000	234780000	0	300980000	202450000	0	225590000	282970000
O34632	Sirohydrochlorin ferrochelatase	sirB	118.97	57.1	1819100000	2669600000	1370200000	1242600000	1147200000	1150700000	1299500000	1263500000	1203100000	1664600000	1469000000	817710000
O34633	Uncharacterized protein YjlC	yjlC	43.302	25	631030000	210600000	942970000	505490000	570400000	598610000	339640000	298600000	461300000	498430000	487220000	330580000
O34634	Putative Holliday junction resolvase	yrrK	10.362	31.2	0	0	0	0	0	0	0	0	0	0	102600000	0
O34635	Probable L-serine dehydratase, beta chain	sdaAB	37.388	35	487040000	543520000	519530000	811390000	754940000	640500000	627630000	680730000	800140000	1027100000	715930000	847470000
O34640	Uncharacterized protein YerI	yerI	13.395	33.9	0	0	0	0	173490000	225300000	0	0	0	0	0	0
O34641	ABC transporter ATP-binding protein YtrB	ytrB	1.7546	7.9	0	0	0	0	0	0	0	11760000	0	0	0	0
O34643	Uncharacterized HTH-type transcriptional regulator YvkB	yvkB	3.2037	5.8	0	0	0	0	0	0	0	0	0	0	0	0
O34645	Alpha-galactosidase	melA	28.047	25.2	0	0	0	0	415920000	434420000	0	210960000	247910000	0	0	0
O34659	YbbR-like domain-containing protein YbbR	ybbR	16.654	21.3	282570000	0	226660000	239450000	0	0	293500000	0	0	0	0	353550000
O34660	Putative aldehyde dehydrogenase DhaS	dhaS	323.31	58.2	8772800000	14727000000	12634000000	23321000000	26506000000	26660000000	28606000000	27329000000	29378000000	21063000000	19147000000	21083000000
O34666	Carboxy-terminal processing protease CtpA	ctpA	103.82	49.1	838040000	1011200000	822430000	1014800000	941930000	971300000	907610000	1062800000	952320000	693400000	855210000	640270000
O34667	S-ribosylhomocysteine lyase	luxS	195.89	46.5	3779100000	3738200000	5458000000	3928800000	3796600000	3737100000	4521000000	4695100000	4663300000	4335600000	4327600000	4140500000
O34669	Cell wall-binding protein YocH	yocH	296.84	34.8	0	0	286940000	259360000	278830000	201520000	0	0	253360000	732060000	2187400000	502620000
O34680	Probable BsuMI modification methylase subunit YdiP	ydiP	40.79	34.4	326020000	363000000	242010000	0	0	0	0	0	200200000	0	0	0
O34687	50S ribosomal protein L32	rpmF	81.879	66.1	20548000000	25820000000	17282000000	34817000000	35393000000	34758000000	27161000000	30171000000	30109000000	0	0	20712000000
O34689	Putative ring-cleaving dioxygenase MhqA	mhqA	79.81	30.1	526710000	899600000	531300000	1271500000	1220000000	1097500000	1307100000	1376500000	868740000	888170000	858580000	891630000
O34691	Putative niacin/nicotinamide transporter NaiP	naiP	3.5157	4	510870000	0	0	0	0	0	0	0	0	0	0	0
O34693	Uncharacterized protein YloA	yloA	35.091	20.3	402680000	0	312680000	292500000	342720000	349680000	374830000	365970000	345750000	235620000	312300000	343250000
O34696	Uncharacterized transferase YtoA	ytoA	3.7304	6.4	0	0	0	0	0	0	0	0	0	0	0	59892000
O34697	Bacitracin export ATP-binding protein BceA	bceA	10.586	19.4	0	0	77902000	0	0	0	0	0	0	0	0	0
O34703	Uncharacterized ATPase YjoB	yjoB	26.384	13.5	672560000	753050000	632370000	0	0	0	0	0	0	0	0	0
O34705	Phospholipase YtpA	ytpA	12.313	23.2	68388000	108290000	0	0	0	0	0	0	0	0	0	0
O34707	Tetraprenyl-beta-curcumene synthase	ytpB	5.7037	8.2	0	0	0	0	0	0	0	0	0	0	15603000	0
O34709	HTH-type transcriptional repressor OpcR	opcR	2.4398	13.5	0	0	0	18926000	0	0	0	0	0	0	0	0
O34714	Oxalate decarboxylase OxdC	oxdC	323.31	56.1	5441000000	8183400000	10989000000	93595000000	93771000000	92447000000	111110000000	109090000000	114110000000	67916000000	63525000000	61802000000
O34717	Probable 2,4-dienoyl-CoA reductase	fadH	19.523	23.2	469220000	549870000	371920000	521160000	516190000	513560000	457380000	466750000	0	0	0	0
O34722	Uncharacterized protein YfmG	yfmG	115.28	26.7	2585000000	4093700000	2937900000	3251600000	3473900000	3877600000	2192800000	2724200000	2198000000	1283500000	1350900000	1560400000
O34725	Uncharacterized lipoprotein YjhA	yjhA	278.03	54.9	7471800000	9941800000	9947400000	6983500000	6661500000	6947100000	5610300000	5085100000	5770500000	3925600000	4058100000	6558900000
O34726	Putative malate transporter YflS	yflS	8.858	7.9	0	0	27883000	0	0	0	0	0	0	0	0	0
O34737	Probable flavodoxin-1	ykuN	15.403	22.8	329880000	561260000	440430000	0	597950000	600130000	461490000	602190000	642820000	0	0	428030000
O34738	Putative HMP/thiamine permease protein YkoE	ykoE	21.66	14.1	639660000	0	213030000	0	0	0	0	0	0	0	0	0
O34743	Uncharacterized protein YlbA	ylbA	108.45	85.8	3983700000	7737300000	4941400000	11707000000	10595000000	11617000000	9519500000	8245400000	10179000000	9121100000	9558700000	9022000000
O34745	Uncharacterized symporter YodF	yodF	19.506	6.9	313430000	606450000	281450000	0	0	244080000	0	0	0	0	0	0
O34746	3-oxoacyl-[acyl-carrier-protein] synthase 3 protein 1	fabHA	109.83	48.4	5486800000	6588000000	5141400000	2483500000	2519800000	2645000000	3106300000	2861500000	2930700000	3457600000	3243200000	3578600000
O34748	Probable ATP-dependent DNA helicase RecQ	recQ	14.418	17.1	0	148080000	0	0	0	0	0	0	0	0	0	0
O34750	Probable ATP-dependent RNA helicase YfmL	yfmL	9.9056	26.3	0	0	0	163300000	0	0	140810000	127310000	0	0	116690000	0
O34751	Uncharacterized protein YloV	yloV	94.657	30.7	1021700000	1289500000	1144000000	1374200000	1424400000	1665700000	1534000000	1663200000	1355100000	1245800000	1305300000	1243200000
O34752	Prolipoprotein diacylglyceryl transferase	lgt	60.059	12.3	0	495870000	1112600000	877900000	0	626910000	682340000	691900000	0	0	705980000	0
O34753	Probable undecaprenyl-phosphate N-acetylglucosaminyl 1-phosphate transferase	tagO	3.6298	5	0	0	0	0	0	0	0	11202000	0	0	0	0
O34756	Putative ABC transporter ATP-binding protein YjkB	yjkB	18.205	6.4	0	71996000	0	0	0	0	0	0	0	0	0	0
O34758	UPF0755 protein YrrL	yrrL	45.711	38.9	625990000	488770000	605860000	399330000	276940000	399480000	881210000	431800000	404710000	348570000	464590000	390340000
O34759	Uncharacterized protein YdjO	ydjO	44.32	50.7	0	276250000	0	0	0	215940000	0	0	0	0	0	165840000
O34760	Probable quorum-quenching lactonase YtnP	ytnP	6.3823	10.7	0	0	0	0	298120000	0	0	0	0	0	0	0
O34762	Organic hydroperoxide resistance protein OhrA	ohrA	20.298	30.5	138880000	0	114510000	269790000	271600000	0	328150000	310330000	0	0	0	0
O34764	Sulfate adenylyltransferase	sat	274.17	59.9	6027600000	6482700000	5598200000	9399100000	10719000000	10666000000	10630000000	10702000000	10316000000	13742000000	13627000000	9085700000
O34768	Uncharacterized sugar kinase YdjE	ydjE	71.118	46.6	4495100000	5755300000	4306300000	4201100000	4523900000	4522000000	4889900000	5085000000	4350600000	3711400000	4164800000	3485000000
O34774	Uncharacterized protein YobJ	yobJ	38.567	26.4	2529700000	2197300000	2611500000	2008200000	1859600000	2102000000	1670500000	1602200000	1546400000	1375300000	1202000000	1330000000
O34777	Organic hydroperoxide resistance transcriptional regulator	ohrR	9.9606	27.9	0	0	0	0	0	0	0	0	0	141660000	0	0
O34779	Protein phosphatase PrpC	prpC	87.626	17.3	898950000	454540000	1137000000	751940000	737170000	807870000	1019800000	892230000	841390000	720090000	583220000	671080000
O34782	Uncharacterized oxidoreductase YvrD	yvrD	106.86	47.9	851540000	742920000	1048900000	1109800000	1288000000	1337000000	1379800000	1326800000	1477100000	1445600000	1521700000	1428300000
O34784	Uncharacterized membrane protein YobI	yobI	60.017	17.7	871470000	1606900000	1105700000	978580000	0	1108600000	679910000	864720000	0	1172500000	901380000	910410000
O34787	Polyketide biosynthesis protein PksE;Malonyl CoA-acyl carrier protein transacylase	pksE	67.1	26.3	820840000	773340000	887730000	668560000	610860000	621720000	832980000	909020000	787270000	685490000	853450000	1031500000
O34788	(R,R)-butanediol dehydrogenase	bdhA	323.31	52.9	66537000000	64577000000	67346000000	89514000000	97010000000	91770000000	100460000000	96166000000	102310000000	124240000000	120730000000	92093000000
O34789	Uncharacterized protein YdjI	ydjI	198.9	44.6	7915400000	7671500000	7165400000	6039600000	4900200000	5186300000	4770300000	4050900000	4251000000	4111300000	4118100000	3412300000
O34792	UPF0750 membrane protein YvjA	yvjA	28.359	17.4	0	0	83088000	0	0	0	0	0	0	0	0	0
O34796	Uncharacterized phosphotransferase YvkC	yvkC	20.553	10.7	0	0	0	0	180830000	158470000	0	174760000	159360000	0	0	0
O34797	Phosphopantetheine adenylyltransferase	coaD	39.386	29.8	0	155400000	0	0	0	0	0	0	0	0	0	0
O34798	Peptidoglycan-N-acetylmuramic acid deacetylase PdaC	pdaC	5.5583	15.8	0	68187000	0	0	0	0	0	0	0	0	0	0
O34803	Uncharacterized protein YeaA	yeaA	17.831	21.6	0	0	325760000	0	0	0	0	0	0	0	0	0
O34805	Uncharacterized ABC transporter substrate-binding lipoprotein YvrC	yvrC	20.248	15.6	0	759970000	0	0	0	0	0	0	0	0	0	0
O34809	Uncharacterized protein YceG	yceG	48.244	28.3	1250500000	781730000	1501300000	955020000	681420000	553820000	669520000	820090000	673800000	527300000	702100000	388100000
O34812	Putative NADP-dependent oxidoreductase YfmJ	yfmJ	140.26	51.6	1925700000	2356800000	1549100000	1996000000	2559100000	2534200000	2332100000	2371900000	2504900000	2462000000	2671400000	1844500000
O34813	Precorrin-2 dehydrogenase	sirC	11.744	25.9	0	0	0	0	90291000	0	0	0	0	0	0	0
O34814	Cell division ATP-binding protein FtsE	ftsE	197.85	68.4	4109100000	1930400000	3933800000	2055400000	2053200000	2133200000	2826800000	2648700000	2563700000	2293800000	2209100000	2209000000
O34815	Putative 2-hydroxyacid dehydrogenase YoaD	yoaD	2.0076	4.1	0	0	0	57377000	0	0	0	0	0	0	0	0
O34817	HTH-type transcriptional repressor YvoA	yvoA	10.914	21	123510000	117320000	0	141050000	0	162330000	124250000	135920000	123970000	120230000	126630000	101970000
O34824	Phosphoglucosamine mutase	glmM	257.56	54	5945000000	7573800000	4467300000	6271000000	6739900000	6395800000	7136300000	6960800000	5989100000	5893900000	4996100000	6343200000
O34825	Polyketide biosynthesis malonyl CoA-acyl carrier protein transacylase PksC	pksC	98.612	32.6	2022400000	3021100000	1863300000	1918300000	1889700000	2016300000	2812100000	2265100000	2149100000	2027200000	1829200000	2144500000
O34827	Uncharacterized HTH-type transcriptional regulator YkuM	ykuM	26.99	22.2	0	0	0	0	178670000	189600000	0	237060000	0	0	0	0
O34828	UPF0473 protein YrzB	yrzB	4.2586	11.8	0	0	0	0	0	0	0	0	0	0	0	585490000
O34829	Uncharacterized HTH-type transcriptional regulator MsmR	msmR	3.002	4.4	0	0	0	0	29613000	0	0	0	0	0	0	0
O34833	Uncharacterized protein YceH	yceH	323.31	91.5	26034000000	32741000000	24209000000	18965000000	16693000000	16242000000	17630000000	16783000000	16280000000	16561000000	12799000000	14670000000
O34841	Uncharacterized protein YoeB	yoeB	192.4	76.2	8576500000	18776000000	11848000000	19531000000	19489000000	19311000000	14293000000	13500000000	16102000000	21606000000	19328000000	14534000000
O34842	Putative hydrolase MhqD	mhqD	26.918	44.5	0	0	0	330540000	355930000	407290000	195010000	180540000	358630000	211200000	240330000	230540000
O34844	HTH-type transcriptional regulator YodB	yodB	46.281	48.2	220370000	341660000	259000000	385600000	427020000	506440000	362770000	352960000	375480000	294640000	298050000	317640000
O34847	Acetyl-coenzyme A carboxylase carboxyl transferase subunit alpha	accA	280.19	59.7	4386000000	5962500000	4978700000	2570500000	2332500000	2677200000	3034800000	2372100000	2627200000	3424700000	2961600000	3596100000
O34857	Repressor rok	rok	32.725	46.6	0	0	209920000	0	282810000	272360000	167550000	0	140440000	227580000	0	0
O34858	Argininosuccinate lyase	argH	2.5877	3.7	0	27933000	0	0	0	0	0	0	0	0	0	0
O34860	RsbT co-antagonist protein RsbRB	rsbRB	143.62	36.1	1436300000	1603200000	1413800000	989400000	1074000000	1092500000	1230700000	1088600000	1212300000	781830000	959920000	1217500000
O34863	UvrABC system protein A	uvrA	91.152	18.7	682020000	515140000	861400000	501580000	494210000	592810000	495610000	510630000	460690000	555750000	396900000	426810000
O34866	Putative carboxypeptidase YodJ	yodJ	72.666	38.5	630050000	463740000	574180000	468870000	584070000	686920000	566770000	488100000	675630000	757230000	730900000	608600000
O34872	Putative carbonic anhydrase YtiB	ytiB	46.26	63.1	571940000	0	697800000	814000000	1066400000	1072500000	835680000	853280000	933340000	774230000	1003500000	607060000
O34874	Putative cysteine desulfurase IscS 2	iscS2	51.391	16.5	0	0	85133000	0	0	0	41660000	0	0	0	0	0
O34876	Cell division protein FtsX	ftsX	167.51	35.8	1241800000	2150000000	607880000	985220000	789890000	821910000	849810000	1279400000	765550000	553400000	796080000	1309400000
O34877	Polyketide biosynthesis acyltransferase homolog PksD	pksD	74.417	32.7	1002400000	1564500000	1256200000	968770000	963750000	1238200000	1295900000	1011000000	1319100000	1456100000	1572500000	1209900000
O34885	Type-2 restriction enzyme BsuMI component YdiS	ydiS	76.622	28.3	1230200000	1167700000	1124000000	886380000	823320000	856570000	987180000	850300000	914500000	1054800000	874690000	1039400000
O34889	Sporulation-delaying protein SdpA	sdpA	20.271	31.6	0	0	0	0	0	92780000	0	171120000	0	0	0	0
O34894	Septation ring formation regulator EzrA	ezrA	299.88	34.7	1781000000	1793300000	2215100000	1940300000	1807100000	1769100000	1857500000	2101400000	1907500000	2275700000	2274900000	2255000000
O34897	Uncharacterized MscS family protein YkuT	ykuT	13.061	8.2	0	17172000	0	0	0	0	0	0	0	0	0	0
O34899	Cob(I)yrinic acid a,c-diamide adenosyltransferase	yvqK	3.7313	10.4	0	0	0	0	0	0	0	0	0	0	54907000	0
O34909	Putative adenine deaminase YerA	yerA	28.203	25.2	0	0	257370000	323340000	301720000	293660000	442630000	373880000	378080000	458050000	401000000	337290000
O34911	Putative HMP/thiamine-binding protein YkoF	ykoF	54.455	31.5	2513800000	2873900000	1584900000	1773800000	1387100000	1503300000	824710000	952820000	920120000	493170000	0	862120000
O34916	N-acetyldiaminopimelate deacetylase	ykuR	66.524	35.8	1146900000	1420000000	539740000	490490000	619350000	621910000	424360000	340140000	455030000	880430000	955230000	279060000
O34921	Uncharacterized protein YtoI	ytoI	25.855	12.3	168490000	0	228600000	0	0	0	0	0	0	0	0	0
O34922	Uncharacterized membrane protein YtpI	ytpI	2.6793	8	0	0	0	0	0	0	0	0	0	9692900	0	0
O34924	Putative aminopeptidase YtoP	ytoP	109.45	53.8	614240000	780870000	868020000	1065600000	1125700000	1221600000	1118700000	1297400000	1091400000	949560000	839430000	861480000
O34925	Purine nucleoside phosphorylase DeoD-type	deoD	323.31	74.2	2275000000	1213500000	1796800000	3678100000	3097700000	3093700000	4299800000	4387200000	3627900000	3879700000	3853200000	4396000000
O34926	Pulcherriminic acid synthase	cypX	323.31	63.7	35945000000	21064000000	35003000000	77966000000	70710000000	70243000000	80440000000	67296000000	71216000000	76352000000	75157000000	70787000000
O34930	Response regulator aspartate phosphatase K	rapK	160.88	41.8	5264200000	4097200000	4191400000	4326300000	4112600000	4417100000	3593900000	4254100000	3649300000	2801600000	3169700000	3277300000
O34932	Dephospho-CoA kinase	coaE	46.705	38.1	291000000	656590000	619930000	0	545560000	670430000	533900000	455590000	0	800140000	648090000	393100000
O34934	NAD kinase 2	nadK2	209.29	44.6	5265500000	4699600000	4704300000	2528500000	2353100000	2659300000	2477400000	2510000000	2239600000	2293700000	2026800000	2645600000
O34939	Probable BsuMI modification methylase subunit YdiO	ydiO	17.62	18.5	0	0	128130000	0	0	134540000	0	0	0	0	0	0
O34940	Putative sugar lactone lactonase YvrE	yvrE	39.067	40.1	506430000	404890000	260970000	530870000	483240000	385020000	0	472880000	0	0	0	546970000
O34942	ATP-dependent DNA helicase RecG	recG	11.832	9.1	0	137340000	0	0	0	0	0	0	0	0	0	48597000
O34943	Putative tRNA-binding protein YtpR	ytpR	145.54	65.7	4772600000	2856100000	6043500000	4207100000	5111900000	4764300000	5275100000	4827300000	5072300000	5893300000	5821400000	4805900000
O34944	Putative dipeptidase YtjP	ytjP	323.31	57.5	3212600000	1698400000	3236800000	6482400000	6868800000	6825400000	5763300000	5383300000	5813600000	5652600000	5920500000	4968900000
O34946	High-affinity zinc uptake system ATP-binding protein ZnuC	znuC	33.522	19.9	340400000	345700000	0	0	0	0	0	0	0	0	0	0
O34948	Uncharacterized oxidoreductase YkwC	ykwC	290.72	66.7	19802000000	18179000000	19656000000	16040000000	17096000000	16930000000	19138000000	18089000000	18324000000	19195000000	17726000000	16770000000
O34949	Uncharacterized HTH-type transcriptional regulator YkoM	ykoM	29.257	26.6	839740000	722710000	431920000	351670000	235420000	258970000	371780000	750930000	427560000	147430000	174190000	325740000
O34951	Sensory transduction protein BceR	bceR	12.747	10.4	209380000	0	0	175740000	0	147670000	157050000	192610000	0	0	0	145830000
O34952	Lipoteichoic acid synthase 2;Glycerol phosphate lipoteichoic acid synthase 2;Processed glycerol phosphate lipoteichoic acid synthase 2	ltaS2	16.14	7.1	0	224870000	0	0	0	0	0	0	0	0	0	0
O34960	Uncharacterized protein YjgB	yjgB	3.036	7.3	0	38919000	0	0	0	0	0	0	0	0	0	0
O34962	Probable NAD-dependent malic enzyme 4	ytsJ	323.31	79.8	9270600000	14000000000	7940400000	13239000000	16164000000	15697000000	14282000000	14062000000	16402000000	14392000000	19734000000	12992000000
O34966	High-affinity zinc uptake system binding-protein ZnuA	znuA	14.947	10	0	101150000	0	0	0	0	0	0	0	0	0	0
O34967	50S ribosomal protein L31 type B	rpmE2	18.22	13.4	0	0	0	0	0	0	0	0	0	0	0	94143000
O34969	Uncharacterized oxidoreductase YfjR	yfjR	117.72	52.4	340810000	985710000	526720000	757520000	857370000	966010000	809500000	677060000	921810000	850480000	852870000	681660000
O34977	Uncharacterized ABC transporter ATP-binding protein YthP	ythP	13.992	13.1	81280000	0	0	0	0	0	57869000	0	0	33941000	0	0
O34979	Uncharacterized ABC transporter ATP-binding protein YvrO	yvrO	27.934	14.8	457590000	589310000	515550000	297070000	0	0	0	0	0	278430000	214370000	0
O34981	2,3,4,5-tetrahydropyridine-2,6-dicarboxylate N-acetyltransferase	dapH	237.57	50.8	10375000000	13893000000	7667300000	8803300000	8611200000	8519000000	9129100000	9390200000	8663400000	10511000000	8187000000	9902600000
O34983	Uncharacterized N-acetyltransferase YoaP	yoaP	2.1747	4	0	0	2937000000	0	0	0	0	0	0	0	0	0
O34987	Guanine/hypoxanthine permease PbuG	pbuG	6.0499	6.8	0	67183000	0	0	0	0	0	0	0	0	0	0
O34989	Sensor histidine kinase YvrG	yvrG	4.8531	9.7	0	0	0	0	0	0	0	15070000	0	0	0	0
O34990	Formyltetrahydrofolate deformylase	purU	140.76	31	1441600000	2131500000	1051800000	947030000	812090000	920230000	937190000	1216200000	988750000	855090000	686730000	872840000
O34992	Glycine betaine/carnitine/choline transport ATP-binding protein OpuCA	opuCA	83.637	18.9	330720000	0	216130000	0	0	0	144970000	0	0	0	0	0
O34994	Transcriptional repressor CcpN	ccpN	58.268	45.3	1197200000	1398400000	1581700000	1361100000	1338000000	1338500000	1271100000	1204900000	1511500000	1222900000	1419900000	1199900000
O34996	DNA polymerase I	polA	175.19	41.5	3013600000	3613700000	2281700000	2103200000	1911700000	1906800000	1984700000	2040200000	1952700000	2092700000	2053100000	2039500000
O35000	Glucosamine-6-phosphate deaminase 1	nagB	143.67	49.6	1638600000	1083600000	1352900000	2076900000	2331400000	2393700000	1683800000	1871800000	1856500000	1613100000	1419900000	1389500000
O35004	UPF0603 protein YdjH	ydjH	50.43	35.4	1336900000	1165700000	760560000	366870000	291250000	319310000	484450000	371670000	293820000	201420000	201480000	317310000
O35005	ABC transporter permease YtrF	ytrF	40.018	21.6	340060000	362840000	361320000	258330000	252980000	0	246860000	248710000	0	217950000	235740000	138050000
O35007	Putative efflux system protein YvrP	yvrP	66.214	43.1	604080000	467290000	930070000	661670000	909880000	1066200000	795310000	475990000	812480000	747270000	0	430090000
O35008	Putative protein YtqA	ytqA	5.5209	9.9	53032000	0	0	0	0	0	0	0	0	0	0	0
O35011	DNA-directed RNA polymerase subunit omega	rpoZ	163.73	88.1	3780100000	1574100000	4013500000	6160800000	5201200000	5609900000	4160100000	3963900000	5130300000	5896600000	5898700000	3980900000
O35013	Putative 8-oxo-dGTP diphosphatase YtkD	ytkD	9.1956	20.3	0	234010000	0	0	0	0	0	0	0	0	0	0
O35014	Uncharacterized EAL-domain containing protein YkuI	ykuI	82.012	20.9	610810000	676920000	605100000	594480000	536130000	591980000	690860000	716910000	627970000	600890000	521360000	527600000
O35016	Low molecular weight protein-tyrosine-phosphatase YfkJ	yfkJ	26.49	21.8	391030000	278660000	0	0	0	0	0	0	0	0	0	0
O35017	Uncharacterized zinc-type alcohol dehydrogenase-like protein YogA	yogA	5.1268	5.2	0	0	0	0	0	0	0	0	0	0	0	36984000
O35020	tRNA-specific 2-thiouridylase MnmA	mnmA	90.331	31.5	1571000000	2758300000	1606400000	1008600000	904230000	929720000	938490000	944550000	778880000	886730000	677640000	908770000
O35022	FMN-dependent NADH-azoreductase 1	azoR1	136.44	54.8	8081500000	12893000000	7007400000	8620700000	6256400000	6225900000	7239800000	8864000000	6990200000	6379700000	6416500000	9880000000
O35025	Type-2 restriction enzyme BsuMI component YdiR	ydiR	114.57	39.3	836580000	1075100000	854220000	323940000	440720000	370050000	351790000	478020000	416830000	329490000	469850000	501580000
O35031	Acylphosphatase	acyP	11.13	35.2	0	0	0	0	0	0	0	0	147090000	0	0	0
O35033	Probable coenzyme A biosynthesis bifunctional protein CoaBC;Phosphopantothenoylcysteine decarboxylase;Phosphopantothenate--cysteine ligase	coaBC	143.46	38.9	4628500000	3634500000	5257900000	3438300000	3284600000	3251000000	3270500000	2702300000	3214500000	4093200000	3512800000	3282400000
O35043	Uncharacterized MscS family protein YfkC	yfkC	12.144	7.9	17910000	0	0	0	0	0	0	0	0	0	0	0
O35044	Sensor protein BceS	bceS	10.517	8.4	0	51596000	0	0	0	0	0	0	0	0	0	0
O35046	Putative carboxypeptidase YocD	yocD	75.175	28.6	0	0	0	0	151650000	0	0	0	125200000	0	0	0
O54408	GTP pyrophosphokinase	relA	323.31	46.9	7047000000	8262600000	6046600000	4231000000	3709300000	3845100000	4192700000	4719600000	4106800000	4109300000	3780800000	3625700000
O68260	Uncharacterized protein YoyC	yoyC	5.0149	25	0	105850000	0	0	0	0	0	0	0	0	0	0
P00497	Amidophosphoribosyltransferase	purF	73.407	26.5	360520000	381080000	372970000	313520000	254230000	223060000	293460000	410650000	309150000	502010000	391860000	347030000
P02394	50S ribosomal protein L7/L12	rplL	38.368	89.4	5989000000	9864400000	4909100000	5657500000	5658100000	5624900000	6447400000	5877100000	5594700000	5406400000	3978000000	5643200000
P02968	Flagellin	hag	323.31	100	118270000000	164360000000	125690000000	343550000000	298450000000	295650000000	266310000000	320560000000	320360000000	285360000000	236950000000	282170000000
P04189	Subtilisin E	aprE	113.75	25.7	4234400000	1106100000	820530000	3349400000	4885700000	3979500000	722420000	2012600000	1172200000	0	0	322970000
P04948	Homoserine kinase	thrB	32.511	47.2	1292500000	2854700000	1443800000	955590000	836500000	1007000000	846470000	782280000	940380000	891520000	1190500000	1109200000
P04969	30S ribosomal protein S11	rpsK	156.34	50.4	64971000000	49050000000	101560000000	44608000000	43156000000	53039000000	38777000000	34420000000	38233000000	40193000000	39276000000	35914000000
P04990	Threonine synthase	thrC	323.31	67.3	7858900000	10568000000	6563300000	14743000000	15943000000	15210000000	15674000000	15280000000	15383000000	13638000000	13296000000	14473000000
P05096	DNA primase	dnaG	25.642	13.4	190920000	151150000	0	107130000	0	0	109090000	172180000	0	0	0	237590000
P05306	PTS system sucrose-specific EIIBC component;Sucrose-specific phosphotransferase enzyme IIB component;Sucrose permease IIC component	sacP	23	7.6	0	0	0	80170000	0	0	109650000	0	0	59366000	97394000	80936000
P05645	3-isopropylmalate dehydrogenase	leuB	221.2	43	1273100000	1194600000	1317400000	2072700000	2419100000	2537100000	1705200000	1943700000	2126800000	1496200000	1359000000	1157300000
P05647	50S ribosomal protein L34	rpmH	11.112	36.4	1416900000	1550900000	555020000	598340000	271680000	364770000	603970000	1647800000	850260000	322880000	408530000	1099700000
P05648	Chromosomal replication initiator protein DnaA	dnaA	215.51	52.9	2642000000	3571700000	3314700000	2617400000	2304300000	2277200000	2773000000	2132400000	2406500000	2796000000	2649600000	2812300000
P05649	DNA polymerase III subunit beta	dnaN	224.82	60.3	8151500000	11322000000	7816200000	7278600000	6091200000	7184200000	7223100000	6487700000	6542700000	6785900000	6655700000	7110900000
P05650	Uncharacterized protein YaaA	yaaA	20.818	42.3	0	0	0	0	1256800000	892290000	0	0	0	587070000	818390000	0
P05651	DNA replication and repair protein RecF	recF	4.6396	6.2	29796000	0	0	0	0	0	0	0	0	0	0	0
P05652	DNA gyrase subunit B	gyrB	214.29	46.4	4982700000	7083200000	5098400000	3866000000	3688400000	3976600000	3897200000	3879600000	3636500000	4156800000	3371900000	4176300000
P05653	DNA gyrase subunit A	gyrA	323.31	48.4	7815000000	10686000000	5818700000	6226600000	5772000000	5965400000	5449100000	5631300000	5420100000	5251100000	4330100000	5335000000
P05654	Aspartate carbamoyltransferase	pyrB	144.11	24.3	0	0	700380000	0	809830000	0	0	0	0	717890000	756220000	758170000
P05655	Levansucrase	sacB	10.328	20.5	0	0	0	812560000	0	0	1097800000	820940000	647780000	0	0	1490500000
P05657	50S ribosomal protein L27	rpmA	186.19	58.5	19520000000	16180000000	17294000000	31262000000	34735000000	36043000000	29534000000	30625000000	33784000000	25497000000	22842000000	31530000000
P06224	RNA polymerase sigma factor SigA	sigA	323.31	66.3	6847100000	11245000000	7689900000	7645100000	8040400000	8926200000	8646200000	7480200000	9626300000	8934500000	8117100000	8027900000
P06533	HTH-type transcriptional regulator SinR	sinR	14.468	28.8	288120000	459590000	300100000	273100000	218610000	0	288590000	228900000	0	259550000	0	339070000
P06534	Stage 0 sporulation protein A	spo0A	113.08	30.7	1678500000	3529100000	984280000	931330000	673080000	678930000	898980000	1273700000	786480000	622580000	820870000	1464200000
P06535	Sporulation initiation phosphotransferase B	spo0B	2.2444	19.8	0	0	0	0	0	0	0	0	0	0	0	35434000
P06567	Primosomal protein DnaI	dnaI	26.342	28	78834000	0	0	0	0	0	0	68911000	0	0	0	0
P06574	RNA polymerase sigma-B factor	sigB	58.196	38.9	716850000	1227300000	904450000	449480000	587540000	542240000	414180000	362710000	536730000	469970000	464700000	410530000
P06628	Sporulation initiation phosphotransferase F	spo0F	32.323	49.2	0	241640000	270460000	560960000	410560000	562700000	484490000	317610000	404710000	363760000	688520000	417570000
P06629	Uncharacterized protein YwjG	ywjG	62.721	34.7	1944100000	2429400000	1665600000	1388500000	1541600000	1783400000	1123200000	1057500000	1627500000	1001100000	1402500000	888490000
P07343	Fumarate hydratase class II	fumC	323.31	58.9	17490000000	21814000000	14753000000	16987000000	22551000000	19408000000	20680000000	23137000000	22157000000	16444000000	22454000000	21578000000
P07372	Stage II sporulation protein D	spoIID	1.6626	9.3	0	0	24931000	0	0	0	0	0	0	0	0	0
P07860	RNA polymerase sigma-F factor	sigF	57.922	14.9	0	0	0	109240000	143240000	0	150370000	0	0	107650000	0	0
P07908	Replication initiation and membrane attachment protein	dnaB	5.5029	20.8	26306000	0	0	0	0	0	0	0	0	0	0	0
P08064	Succinate dehydrogenase cytochrome b558 subunit	sdhC	10.502	13.9	0	0	0	0	0	0	0	0	0	0	0	49754000
P08065	Succinate dehydrogenase flavoprotein subunit	sdhA	323.31	81.2	42644000000	25347000000	44503000000	37171000000	37936000000	39761000000	34129000000	32211000000	34092000000	36696000000	35162000000	36412000000
P08066	Succinate dehydrogenase iron-sulfur subunit	sdhB	323.31	78.3	20199000000	22640000000	18977000000	11557000000	12262000000	11504000000	13355000000	14110000000	11593000000	11799000000	12098000000	13199000000
P08164	NH(3)-dependent NAD(+) synthetase	nadE	323.31	64.7	13493000000	12822000000	13011000000	20872000000	22666000000	20216000000	21718000000	22892000000	20339000000	18732000000	16325000000	17826000000
P08495	Aspartokinase 2	lysC	49.239	27.2	249630000	386350000	228150000	0	0	0	300310000	203550000	235750000	0	283800000	446240000
P08750	D-alanyl-D-alanine carboxypeptidase DacA	dacA	323.31	72.5	6887200000	11515000000	7819500000	5989100000	5904100000	5919500000	6524200000	5499500000	5409400000	6561500000	5123500000	5640700000
P08821	DNA-binding protein HU 1	hupA	323.31	94.6	77645000000	115710000000	71489000000	122270000000	115140000000	118030000000	158300000000	138480000000	122700000000	114570000000	108770000000	103810000000
P08838	Phosphoenolpyruvate-protein phosphotransferase	ptsI	323.31	52.5	9004900000	6609900000	8860100000	10324000000	11318000000	10483000000	13044000000	12920000000	11400000000	11796000000	9953400000	11243000000
P08874	Transition state regulatory protein AbrB	abrB	136.27	66.7	5639200000	8857100000	6989900000	5637600000	4665000000	4937500000	5825200000	3685700000	5051300000	9464300000	10003000000	6716400000
P08877	Phosphocarrier protein HPr	ptsH	183.24	89.8	3328700000	2792400000	9435200000	6726700000	4795700000	5923400000	8469200000	5654700000	5334900000	6756500000	8445300000	11212000000
P09122	DNA polymerase III subunit gamma/tau	dnaX	113.12	33.4	1711800000	2242400000	1513700000	854490000	493160000	629330000	835320000	584480000	606270000	744900000	472840000	597190000
P09124	Glyceraldehyde-3-phosphate dehydrogenase 1	gapA	323.31	83.3	159990000000	175240000000	174840000000	142610000000	130490000000	139260000000	138960000000	116390000000	134310000000	168490000000	162710000000	147600000000
P09339	Aconitate hydratase A	citB	323.31	65.2	74572000000	64950000000	75614000000	100620000000	109830000000	103740000000	102040000000	97821000000	104480000000	112030000000	113230000000	103380000000
P0C8M5	Transcriptional regulator SlrA	slrA	1.7593	19.2	0	0	0	0	0	0	0	0	0	0	0	0
P0CI73	Glutamine--fructose-6-phosphate aminotransferase [isomerizing]	glmS	323.31	56.2	23893000000	29180000000	17063000000	22912000000	22133000000	22571000000	22528000000	20390000000	22044000000	29201000000	29158000000	29969000000
P0CI74	Cell cycle protein GpsB	gpsB	88.724	49	831710000	797170000	994420000	1132700000	740140000	929490000	914770000	809520000	794390000	771280000	550060000	1438500000
P0CI75	Bifunctional ligase/repressor BirA	birA	19.254	7.7	82719000	0	0	0	0	0	0	0	0	0	0	0
P0CI76	Replication termination protein	rtp	8.3125	27	0	0	0	0	0	0	91484000	0	0	0	0	0
P0CI78	50S ribosomal protein L24	rplX	83.173	87.4	48856000000	36791000000	51569000000	47280000000	54690000000	58272000000	52147000000	54163000000	48059000000	51487000000	51195000000	44174000000
P0CI79	Thymidylate synthase 1	thyA1	3.0374	10.8	0	179420000	0	0	0	0	0	0	0	0	0	0
P10725	Alanine racemase 1	alr1	47.207	27	463970000	881890000	368460000	308960000	285160000	319890000	383020000	461040000	380650000	343780000	342050000	354010000
P10727	Anti-sigma F factor antagonist	spoIIAA	201.06	59	3015300000	1283800000	3151000000	6166200000	6898100000	6378400000	8233400000	6993600000	8038000000	4453200000	4263500000	5616800000
P10728	Anti-sigma F factor	spoIIAB	7.2817	42.5	0	0	0	0	0	0	0	121160000	0	0	0	0
P10943	Hut operon positive regulatory protein	hutP	6.1567	6.8	0	0	0	39777000	0	0	0	0	0	0	0	0
P11018	Major intracellular serine protease	isp	47.785	40.4	290420000	0	0	1724000000	2021300000	1796200000	747960000	728060000	841420000	329840000	328830000	0
P11044	Thymidylate synthase 2	thyA2	79.099	30.3	1232900000	1429300000	1228700000	1046800000	748360000	750250000	927790000	891170000	870300000	866330000	716460000	888120000
P11045	Dihydrofolate reductase	dfrA	16.887	21.4	248700000	0	422440000	0	0	0	0	0	315660000	397570000	0	0
P11065	HTH-type transcriptional regulator Hpr	hpr	15.223	28.6	337560000	681580000	306800000	323450000	360980000	249530000	212560000	236370000	0	0	257170000	254200000
P11469	Uncharacterized protein YsmA	ysmA	27.379	49	870400000	0	480880000	1107300000	802540000	670110000	1122900000	1152400000	666020000	657720000	663610000	897900000
P11742	Methylated-DNA--protein-cysteine methyltransferase, constitutive	ogt	14.247	35.8	0	0	0	0	0	0	103660000	101150000	0	92569000	0	0
P11998	6,7-dimethyl-8-ribityllumazine synthase	ribH	323.31	87.7	10922000000	9098100000	8882000000	14416000000	15052000000	15919000000	14188000000	16411000000	13362000000	15633000000	14996000000	14128000000
P12011	Gluconokinase	gntK	107.25	16.6	677110000	1155800000	707090000	453860000	394610000	450080000	363660000	449130000	404990000	0	0	286230000
P12013	6-phosphogluconate dehydrogenase, NAD(+)-dependent, decarboxylating	gntZ	37.733	29.3	507900000	823670000	681940000	0	972180000	896810000	724070000	441440000	767820000	0	0	621150000
P12039	Phosphoribosylamine--glycine ligase	purD	252.21	64.7	10030000000	13645000000	9169700000	3962800000	3721700000	3616800000	5082800000	4722700000	4115300000	6712700000	6249100000	6913100000
P12040	Phosphoribosylglycinamide formyltransferase	purN	49.746	52.8	564330000	0	682090000	556090000	467380000	444090000	553450000	498300000	498870000	632010000	472510000	652560000
P12041	Phosphoribosylformylglycinamidine synthase subunit PurQ	purQ	26.014	18.1	1754600000	1436800000	1786600000	1079700000	942580000	1177900000	1309300000	1253300000	1078400000	1910600000	1327500000	1729500000
P12042	Phosphoribosylformylglycinamidine synthase subunit PurL	purL	323.31	49.6	15709000000	15577000000	14807000000	6818000000	7439900000	7688200000	9442500000	7931000000	6973800000	10885000000	9763600000	11806000000
P12043	Phosphoribosylformylglycinamidine cyclo-ligase	purM	63	19.4	1875100000	1148900000	2078400000	1546900000	2072900000	1739000000	1714300000	1358100000	1246200000	961540000	914760000	1481900000
P12044	N5-carboxyaminoimidazole ribonucleotide mutase	purE	90.648	68.5	2876500000	2981100000	3148200000	937830000	1049700000	1118900000	977400000	755440000	796900000	1005800000	1024600000	914630000
P12045	N5-carboxyaminoimidazole ribonucleotide synthase	purK	60.588	32.1	2059600000	4113000000	2615200000	764050000	963020000	989710000	709110000	705550000	845020000	1183300000	1559600000	1034200000
P12046	Phosphoribosylaminoimidazole-succinocarboxamide synthase	purC	138.19	48.1	7515200000	5228000000	10815000000	5514200000	5512200000	5268000000	4842000000	4346400000	5040200000	6991500000	5964500000	5267400000
P12047	Adenylosuccinate lyase	purB	323.31	78.9	39664000000	43225000000	32783000000	18352000000	16534000000	16567000000	17555000000	18158000000	16865000000	21761000000	18946000000	24254000000
P12048	Bifunctional purine biosynthesis protein PurH;Phosphoribosylaminoimidazolecarboxamide formyltransferase;IMP cyclohydrolase	purH	323.31	59.8	13386000000	16405000000	11734000000	5946700000	5328600000	6365700000	7087800000	6263900000	6472600000	9981900000	9096400000	10350000000
P12049	Phosphoribosylformylglycinamidine synthase subunit PurS	purS	129.77	61.9	333840000	0	0	0	0	0	0	361550000	0	0	359810000	493820000
P12425	Glutamine synthetase	glnA	323.31	75.7	38843000000	38808000000	37142000000	53158000000	51795000000	52333000000	41852000000	41043000000	38055000000	41819000000	37913000000	39262000000
P12464	DNA-directed RNA polymerase subunit delta	rpoE	22.613	17.3	0	0	0	214940000	0	0	253100000	0	0	0	0	294600000
P12669	DNA-entry nuclease inhibitor	nin	28.364	22	191040000	298580000	0	326960000	0	0	244530000	278350000	236810000	0	0	0
P12873	50S ribosomal protein L29	rpmC	226.71	75.8	19821000000	33897000000	19162000000	20278000000	25387000000	23773000000	22821000000	23760000000	23485000000	22922000000	23393000000	16810000000
P12874	30S ribosomal protein S17	rpsQ	129.56	77	93549000000	78619000000	68980000000	49704000000	46699000000	48102000000	43824000000	68156000000	57245000000	24623000000	29933000000	45021000000
P12875	50S ribosomal protein L14	rplN	110	63.1	45866000000	81728000000	47354000000	37384000000	31680000000	38053000000	32263000000	39316000000	38952000000	21898000000	34152000000	34000000000
P12877	50S ribosomal protein L5	rplE	323.31	82.7	98705000000	102050000000	96153000000	83409000000	82661000000	85595000000	91185000000	85744000000	89182000000	88820000000	73954000000	85511000000
P12878	30S ribosomal protein S14	rpsN1	67.166	60.7	17142000000	12300000000	16077000000	9099600000	8865400000	8508600000	8056000000	7551500000	8381100000	7643600000	5500700000	6790700000
P12879	30S ribosomal protein S8	rpsH	300.67	79.5	54083000000	62631000000	54579000000	39754000000	38010000000	40325000000	35910000000	38078000000	41312000000	35269000000	38408000000	37924000000
P12946	Heme A synthase	ctaA	5.6976	5.9	0	0	0	0	0	0	609680000	533200000	0	0	0	416030000
P13242	CTP synthase	pyrG	256.15	53.1	3238900000	2790000000	2548100000	2123100000	1833200000	2227600000	2491000000	2317300000	2141100000	2819400000	2480300000	2978600000
P13243	Probable fructose-bisphosphate aldolase	fbaA	323.31	84.6	95204000000	101700000000	81797000000	112670000000	122630000000	119260000000	139840000000	130030000000	131340000000	127350000000	105900000000	129730000000
P13267	DNA polymerase III PolC-type	polC	71.342	16.4	325080000	468440000	476200000	0	0	278200000	207390000	191340000	0	0	0	0
P13484	Probable poly(glycerol-phosphate) alpha-glucosyltransferase	tagE	95.496	27.9	1051800000	1484400000	1186000000	700560000	768090000	861880000	1010300000	958770000	866360000	969580000	1002500000	1117700000
P13485	CDP-glycerol:poly(glycerophosphate) glycerophosphotransferase	tagF	125.41	31.4	1551500000	2398500000	1996600000	2009300000	1722600000	1873900000	1700700000	1765300000	1840300000	1568900000	1459000000	1878000000
P13792	Alkaline phosphatase synthesis transcriptional regulatory protein PhoP	phoP	138.08	28.8	1121300000	2122300000	1597000000	1499500000	1459800000	1571000000	1780300000	1549400000	1717900000	1738900000	1805400000	1498000000
P13799	Signal transduction histidine-protein kinase/phosphatase DegS	degS	301.27	54.5	2969500000	2666100000	2555300000	2913700000	2566200000	2899500000	3003500000	2704000000	2888400000	2514500000	2306300000	2236800000
P13800	Transcriptional regulatory protein DegU	degU	323.31	81.7	33637000000	37593000000	40339000000	38795000000	35022000000	36980000000	42809000000	36399000000	40460000000	46769000000	43729000000	45440000000
P14192	Bifunctional protein GlmU;UDP-N-acetylglucosamine pyrophosphorylase;Glucosamine-1-phosphate N-acetyltransferase	glmU	128.6	33.3	1774300000	686980000	1537500000	3095600000	2588800000	2775800000	3346700000	2539300000	2625700000	2672900000	2608200000	2026500000
P14193	Ribose-phosphate pyrophosphokinase	prs	323.31	70.3	7681700000	9552900000	11408000000	7903600000	7565500000	8037500000	8357400000	7547900000	8840700000	12204000000	11843000000	10379000000
P14194	General stress protein CTC	ctc	73.45	30.4	6245400000	5909000000	4461000000	5275300000	5919900000	5230300000	4428100000	4457400000	4801200000	3753700000	3749600000	5372900000
P14203	Uncharacterized protein YuxH	yuxH	3.2672	10.5	0	0	0	0	0	0	0	0	0	0	0	68164000
P14204	Transcriptional regulatory protein ComA	comA	61.107	44.4	2067400000	3454700000	2182500000	1657100000	1638100000	1664100000	1767500000	2124100000	2164000000	1377300000	1624400000	1691700000
P14205	Putative esterase ComA2	yuxO	8.5005	14.3	0	0	0	0	0	0	0	0	616580000	0	0	0
P14577	50S ribosomal protein L16	rplP	122.25	64.6	36161000000	31751000000	50145000000	46738000000	46302000000	46181000000	49221000000	43447000000	45399000000	67382000000	59867000000	58433000000
P14802	Uncharacterized oxidoreductase YoxD	yoxD	323.31	78.6	13336000000	15141000000	14481000000	7738900000	8490000000	8911000000	9841100000	8900500000	8816600000	9778100000	9333400000	10560000000
P14949	Thioredoxin	trxA	147.48	95.2	11821000000	2466700000	14308000000	26664000000	21945000000	22709000000	23180000000	16325000000	19649000000	22508000000	23711000000	26109000000
P14951	UvrABC system protein C	uvrC	2.7897	2	0	42141000	0	0	0	0	0	0	0	0	0	0
P15874	Protein GrpE	grpE	181.88	37.4	724520000	637820000	955910000	558050000	659080000	1046700000	659790000	813270000	969080000	596180000	882670000	674160000
P16263	Dihydrolipoyllysine-residue succinyltransferase component of 2-oxoglutarate dehydrogenase complex	odhB	323.31	62.6	85890000000	91152000000	66173000000	57843000000	59459000000	59931000000	55340000000	54967000000	51015000000	67358000000	67134000000	64434000000
P16304	Adenylate kinase	adk	54.28	59.9	450870000	889860000	572330000	459980000	533260000	535300000	386190000	445260000	469790000	633710000	776990000	467420000
P16336	Protein translocase subunit SecY	secY	38.943	16	6922200000	7850800000	4546000000	5343900000	4169500000	4943400000	5838800000	4827300000	4563700000	5393700000	5082000000	6363100000
P16397	Bacillopeptidase F	bpr	323.31	45.3	11684000000	5787500000	7323400000	36017000000	36969000000	33157000000	24518000000	28831000000	26582000000	9482200000	9183300000	10392000000
P16440	Riboflavin synthase	ribE	27.477	39.1	507590000	478420000	0	502630000	429720000	500950000	612350000	487600000	433930000	537310000	387240000	677620000
P16497	Sporulation kinase A	kinA	17.867	6.9	282130000	776220000	0	272700000	238040000	193160000	349950000	295200000	318490000	166930000	323940000	247630000
P16524	Putative N-acetyl-LL-diaminopimelate aminotransferase	patA	215.98	47.8	7158600000	9471900000	6556800000	5344600000	4629400000	4360200000	5753700000	5582400000	5472100000	5568900000	5267000000	5609300000
P16616	Porphobilinogen deaminase	hemC	154.74	54.5	356070000	621330000	513060000	1735100000	1844300000	1654700000	1789800000	1708500000	1736800000	1412800000	1760200000	1447800000
P16655	Cell division protein DivIB	divIB	22.417	14.8	397480000	595520000	0	0	0	0	0	0	0	0	0	0
P16971	Protein RecA	recA	323.31	73.6	24140000000	26000000000	20151000000	13359000000	11847000000	12135000000	12754000000	13456000000	12167000000	12090000000	11057000000	13503000000
P17585	Aminoglycoside 6-adenylyltransferase	aadK	13.873	21.5	0	298940000	0	253430000	200160000	269180000	220720000	0	262670000	304230000	252860000	216910000
P17618	Riboflavin biosynthesis protein RibD;Diaminohydroxyphosphoribosylaminopyrimidine deaminase;5-amino-6-(5-phosphoribosylamino)uracil reductase	ribD	24.155	21.3	192450000	237370000	164050000	291810000	271340000	327420000	353250000	285000000	0	339360000	189070000	280660000
P17620	Riboflavin biosynthesis protein RibBA;3,4-dihydroxy-2-butanone 4-phosphate synthase;GTP cyclohydrolase-2	ribBA	186.82	43.7	2008600000	1809200000	2209900000	1392100000	1330300000	1280800000	1796000000	1525200000	1029100000	2268300000	1425300000	2553300000
P17622	Protein RibT	ribT	48.747	55.6	0	0	0	0	0	157680000	235210000	237490000	175030000	140510000	171460000	166540000
P17631	Chaperone protein DnaJ	dnaJ	243.69	45.9	8893600000	7934300000	6821800000	5239600000	5476800000	4719500000	5344700000	5000700000	4759400000	4084800000	3872200000	4798400000
P17731	Histidinol-phosphate aminotransferase	hisC	115.68	34.4	4624400000	6783700000	5554000000	2635800000	2386100000	2604700000	2734400000	2385100000	2768900000	2738900000	2456900000	2575000000
P17820	Chaperone protein DnaK	dnaK	323.31	70.4	92334000000	104780000000	79921000000	52637000000	56104000000	59482000000	61461000000	58280000000	53088000000	57299000000	56374000000	66285000000
P17865	Cell division protein FtsZ	ftsZ	323.31	71.7	13482000000	23873000000	8950900000	10965000000	12325000000	11637000000	12118000000	11142000000	10737000000	13654000000	14875000000	15683000000
P17869	RNA polymerase sigma-H factor	sigH	12.805	21.6	183190000	0	0	0	0	0	0	135290000	0	0	0	0
P17889	Translation initiation factor IF-2	infB	323.31	57.7	17514000000	17866000000	19948000000	19830000000	17973000000	18491000000	20202000000	17613000000	17225000000	23324000000	25086000000	26404000000
P17893	Arginine repressor	argR	22.922	18.1	107880000	197670000	73311000	66687000	0	0	51255000	113150000	0	39886000	66909000	159970000
P17894	DNA repair protein RecN	recN	13.922	18.4	0	149580000	0	127820000	0	0	0	0	0	0	0	0
P17903	Anti-sigma-B factor antagonist	rsbV	162.64	53.2	14963000000	11580000000	15140000000	12943000000	10850000000	11922000000	10883000000	10504000000	8856700000	7453100000	7404300000	5737600000
P17904	Serine-protein kinase RsbW	rsbW	111.73	44.4	11358000000	14422000000	10809000000	8797400000	8565000000	8552100000	7364100000	7290400000	6363000000	6539100000	6303200000	6238200000
P17906	Phosphoserine phosphatase RsbX	rsbX	29.185	42.2	0	0	0	0	0	0	0	0	0	0	175550000	0
P17921	Phenylalanine--tRNA ligase alpha subunit	pheS	143.35	52.9	1699100000	2005400000	1280800000	1162100000	1324900000	1303500000	1651500000	1829000000	1391100000	1686500000	1358500000	1668800000
P17922	Phenylalanine--tRNA ligase beta subunit	pheT	323.31	50.4	10083000000	13087000000	8142700000	7213100000	7220500000	7654900000	7916600000	7710100000	7394100000	8253700000	7199200000	8024700000
P18156	Glycerol uptake facilitator protein	glpF	4.865	6.9	2513000000	0	0	0	0	0	0	0	0	0	0	0
P18157	Glycerol kinase	glpK	323.31	64.7	42953000000	47393000000	35898000000	18619000000	15631000000	16650000000	16669000000	16057000000	13820000000	18445000000	15829000000	20631000000
P18158	Aerobic glycerol-3-phosphate dehydrogenase	glpD	323.31	83.4	300250000000	317470000000	282210000000	221720000000	216690000000	214890000000	217930000000	201570000000	224130000000	250920000000	232430000000	202510000000
P18159	Phosphoglucomutase	pgcA	323.31	75.2	68296000000	68618000000	65023000000	60288000000	66599000000	68329000000	70571000000	62578000000	64283000000	68052000000	65641000000	69545000000
P18185	Carbamoyl-phosphate synthase arginine-specific large chain	carB	4.5698	1.9	0	50259000	0	0	0	0	0	0	0	0	0	0
P18186	Ornithine carbamoyltransferase	argF	37.953	24.8	0	0	0	350440000	445400000	371940000	304200000	328160000	204070000	0	0	0
P18255	Threonine--tRNA ligase 1	thrS	270.39	56.1	6484400000	6800700000	6949300000	6504700000	5541200000	5334400000	6802500000	6976200000	6160800000	7912400000	6748400000	7162200000
P18256	Threonine--tRNA ligase 2	thrZ	58.385	7.1	0	0	137350000	0	0	0	0	0	0	0	0	0
P18429	Endo-1,4-beta-xylanase A	xynA	3.1271	10.3	0	0	0	0	0	0	0	82117000	0	0	0	0
P18579	UDP-N-acetylenolpyruvoylglucosamine reductase	murB	220.56	52.1	2629700000	3904900000	3030400000	1129600000	861110000	1119700000	1524100000	1091900000	1167800000	1920000000	1903900000	1371200000
P19079	Cytidine deaminase	cdd	79.323	43.4	192530000	1067000000	550870000	909780000	1019900000	859300000	834420000	692990000	943570000	860970000	959180000	494990000
P19080	Chorismate mutase AroH	aroH	57.749	44.9	352940000	558190000	636800000	880170000	860010000	806520000	732200000	816620000	824010000	885860000	920340000	606580000
P19405	Alkaline phosphatase 3	phoB	323.31	68.4	35061000000	37037000000	30999000000	10285000000	4869200000	6843300000	110890000	267830000	205440000	0	0	0
P19406	Alkaline phosphatase 4	phoA	252.94	55.1	1940500000	2241900000	3115400000	1867000000	959610000	964170000	0	0	246320000	0	0	0
P19465	GTP cyclohydrolase 1	folE	169.07	36.8	3410100000	2287700000	6087700000	4926300000	5623500000	5875500000	4791200000	3874400000	5158100000	5127400000	4797700000	3028300000
P19466	Transcription attenuation protein MtrB	mtrB	118.03	94.7	11662000000	5183200000	7950800000	11357000000	10069000000	9410100000	6713400000	7240500000	8239700000	6808700000	7816800000	6060700000
P19582	Homoserine dehydrogenase	hom	289.11	52.2	8612700000	17745000000	12100000000	11248000000	14019000000	14474000000	12635000000	12972000000	13218000000	10515000000	9599700000	8667500000
P19669	Transaldolase	tal	323.31	93.4	78104000000	80767000000	72177000000	82644000000	72479000000	73923000000	85279000000	71908000000	74997000000	69208000000	78775000000	108330000000
P19670	UDP-N-acetylglucosamine 1-carboxyvinyltransferase 2	murAB	178.07	39.2	2918600000	5732500000	2773900000	1977200000	1990800000	2177900000	1926800000	1871700000	2059400000	2137500000	2150300000	2067300000
P19672	Putative rRNA methyltransferase YqxC	yqxC	10.833	10	244470000	0	0	0	207120000	212740000	0	0	201900000	0	0	0
P19946	50S ribosomal protein L15	rplO	219.18	65.8	15390000000	14553000000	16686000000	27062000000	24824000000	24859000000	26476000000	26676000000	27550000000	29344000000	34229000000	27226000000
P19947	50S ribosomal protein L30	rpmD	249.91	89.8	97341000000	108450000000	49051000000	64743000000	91597000000	69517000000	61203000000	71041000000	68836000000	46567000000	80414000000	50892000000
P19994	Methionine aminopeptidase 1	map	134.02	80.6	751650000	453180000	1322500000	3077200000	3452500000	3172400000	2228300000	2235600000	3028100000	3515200000	3440700000	2442700000
P20166	PTS system glucose-specific EIICBA component;Glucose permease IIC component;Glucose-specific phosphotransferase enzyme IIB component;Glucose-specific phosphotransferase enzyme IIA component	ptsG	8.6703	9.6	0	0	0	0	0	0	0	0	0	120600000	158790000	0
P20277	50S ribosomal protein L17	rplQ	323.31	82.5	21006000000	27374000000	17817000000	29569000000	22803000000	23201000000	29142000000	32605000000	25755000000	29959000000	28924000000	30573000000
P20278	50S ribosomal protein L36	rpmJ	32.62	64.9	37650000000	28149000000	39567000000	47534000000	80539000000	80124000000	49063000000	45341000000	46432000000	0	0	38607000000
P20282	30S ribosomal protein S13	rpsM	323.31	68.6	42020000000	47225000000	37562000000	38630000000	35193000000	36039000000	40215000000	41457000000	35966000000	42219000000	43268000000	47500000000
P20429	DNA-directed RNA polymerase subunit alpha	rpoA	323.31	59.2	24210000000	27037000000	25756000000	21441000000	22639000000	21944000000	26701000000	24597000000	23442000000	24173000000	23818000000	24149000000
P20458	Translation initiation factor IF-1	infA	109.81	77.8	10065000000	2746200000	10896000000	16196000000	12104000000	14561000000	15641000000	11871000000	12015000000	23147000000	25814000000	26214000000
P20668	HTH-type transcriptional regulator GltC	gltC	17.011	21.3	221940000	0	365240000	203790000	267810000	294440000	245100000	254640000	278210000	298040000	260030000	270030000
P20691	3-phosphoshikimate 1-carboxyvinyltransferase	aroA	276	55.8	4664600000	5521600000	5767800000	4206900000	4314800000	4215800000	3799700000	3876200000	4086900000	4083900000	3459400000	3180500000
P20692	Prephenate dehydrogenase	tyrA	59.508	25.3	405950000	509950000	398590000	317550000	367060000	382610000	358510000	297100000	327280000	323600000	0	308480000
P20964	GTPase ObgE	obg	256.91	53.7	5072000000	5377100000	5855200000	2515000000	2481500000	2556700000	2686700000	2510800000	2472900000	3439600000	2778100000	2535300000
P21203	Prephenate dehydratase	pheA	29.267	25.3	1041800000	1071900000	407480000	315540000	322270000	0	0	0	0	334910000	0	385680000
P21204	UPF0735 ACT domain-containing protein YszB	yszB	2.6583	12.9	0	0	0	0	0	0	0	0	0	0	0	301290000
P21335	tRNA-specific adenosine deaminase	tadA	3.9157	6.2	0	0	26378000	0	0	0	0	0	0	0	0	0
P21340	Protease synthase and sporulation negative regulatory protein PAI 1	paiA	31.903	18.6	0	130480000	0	254960000	0	0	318220000	0	0	0	169880000	0
P21341	Protease synthase and sporulation protein PAI 2	paiB	20.063	20.3	0	0	0	0	0	0	0	122110000	0	0	161440000	0
P21458	DNA translocase SpoIIIE	spoIIIE	23.322	13.5	0	0	230050000	197920000	192750000	219170000	0	0	221620000	0	0	0
P21464	30S ribosomal protein S2	rpsB	323.31	77.2	115350000000	129750000000	98396000000	68267000000	64748000000	66183000000	66329000000	75754000000	76885000000	68732000000	65674000000	71387000000
P21465	30S ribosomal protein S3	rpsC	323.31	89	135150000000	165790000000	141370000000	133800000000	111010000000	115430000000	120690000000	116460000000	111060000000	136200000000	122690000000	141140000000
P21466	30S ribosomal protein S4	rpsD	323.31	81.5	125550000000	170540000000	186280000000	132810000000	133000000000	140270000000	122990000000	118720000000	133220000000	141860000000	137540000000	114110000000
P21467	30S ribosomal protein S5	rpsE	323.31	91.6	137610000000	106010000000	139400000000	131650000000	117350000000	125520000000	125010000000	106410000000	124220000000	139280000000	107980000000	104460000000
P21468	30S ribosomal protein S6	rpsF	194.08	95.8	27952000000	28478000000	28695000000	20345000000	21776000000	21043000000	21077000000	20553000000	21497000000	20935000000	21205000000	20683000000
P21469	30S ribosomal protein S7	rpsG	323.31	91	108290000000	123410000000	121110000000	85272000000	79239000000	83929000000	81864000000	88177000000	86251000000	82409000000	70681000000	87407000000
P21470	30S ribosomal protein S9	rpsI	72.194	33.1	34271000000	33412000000	46844000000	21828000000	26530000000	27358000000	22159000000	20013000000	23671000000	17374000000	14339000000	20607000000
P21471	30S ribosomal protein S10	rpsJ	256.11	84.3	88828000000	135200000000	106890000000	65617000000	70130000000	75204000000	67668000000	71663000000	70626000000	66762000000	57025000000	56242000000
P21472	30S ribosomal protein S12	rpsL	246.76	60.9	79547000000	173900000000	46739000000	18903000000	17247000000	18924000000	16925000000	42394000000	26397000000	14517000000	17173000000	46381000000
P21473	30S ribosomal protein S15	rpsO	153.42	58.4	11080000000	9760900000	12434000000	13571000000	14296000000	12176000000	15761000000	14819000000	13430000000	18518000000	18258000000	13619000000
P21474	30S ribosomal protein S16	rpsP	144.8	70	21247000000	30049000000	14738000000	31680000000	22284000000	23671000000	36290000000	29549000000	22962000000	35510000000	33777000000	40102000000
P21475	30S ribosomal protein S18	rpsR	85.98	73.4	6478500000	10814000000	5293800000	6544400000	5422500000	5842200000	5129300000	6146100000	5488500000	4727500000	4238000000	7186900000
P21476	30S ribosomal protein S19	rpsS	142.82	84.8	24854000000	17052000000	28297000000	35089000000	39058000000	40879000000	34614000000	35943000000	40165000000	38254000000	39541000000	39215000000
P21477	30S ribosomal protein S20	rpsT	277.45	53.4	50231000000	42018000000	41599000000	37463000000	36899000000	35069000000	37833000000	41793000000	39914000000	30517000000	33861000000	40268000000
P21478	30S ribosomal protein S21	rpsU	55.055	61.4	1250000000	740820000	1373900000	2507400000	2301400000	3208900000	2426400000	1471400000	1810900000	1778300000	1849100000	1240000000
P21656	Tryptophan--tRNA ligase	trpS	73.614	29.4	970820000	995480000	1468300000	862650000	966120000	1170200000	1006200000	1025300000	1087200000	951050000	746670000	843210000
P21879	Inosine-5-monophosphate dehydrogenase	guaB	323.31	90.8	90041000000	102110000000	111290000000	123490000000	108160000000	115010000000	116740000000	102020000000	117730000000	132010000000	112550000000	110140000000
P21880	Dihydrolipoyl dehydrogenase	pdhD	323.31	76.2	110460000000	128950000000	103740000000	109280000000	124200000000	117700000000	108130000000	104710000000	109880000000	102050000000	104840000000	91457000000
P21881	Pyruvate dehydrogenase E1 component subunit alpha	pdhA	323.31	74.7	39142000000	23393000000	46552000000	33624000000	34564000000	36531000000	27273000000	25001000000	25742000000	26121000000	26338000000	22289000000
P21882	Pyruvate dehydrogenase E1 component subunit beta	pdhB	323.31	81.5	47591000000	32309000000	50665000000	70624000000	74414000000	68643000000	57352000000	46565000000	55210000000	68370000000	65171000000	68486000000
P21883	Dihydrolipoyllysine-residue acetyltransferase component of pyruvate dehydrogenase complex	pdhC	323.31	71.7	97804000000	50630000000	77555000000	64784000000	71044000000	70835000000	55365000000	54059000000	54036000000	59912000000	58778000000	55890000000
P21884	Uncharacterized lipoprotein YkyA	ykyA	6.3486	4.9	0	12056000	0	0	0	0	0	0	0	0	0	0
P21885	Arginine decarboxylase	speA	61.904	15.7	477840000	215260000	538400000	201950000	0	225550000	207270000	0	0	0	0	0
P22250	Glutamate--tRNA ligase	gltX	323.31	55.3	13445000000	14795000000	13938000000	15189000000	17110000000	17275000000	18048000000	16909000000	17165000000	15142000000	14856000000	16607000000
P22326	Tyrosine--tRNA ligase 1	tyrS1	311.43	52.6	3276600000	2365500000	2709000000	4397100000	4786200000	4222700000	4553500000	4553000000	4044400000	5251600000	5744600000	4321900000
P23129	2-oxoglutarate dehydrogenase E1 component	odhA	323.31	56.2	96899000000	108440000000	79709000000	53661000000	57584000000	53523000000	48483000000	55148000000	49536000000	48681000000	40775000000	47579000000
P23445	Flagellum-specific ATP synthase	fliI	30.088	24.2	479710000	498640000	413870000	361030000	265490000	299630000	357630000	363540000	347850000	335440000	216600000	217020000
P23446	Flagellar basal-body rod protein FlgG	flgG	317.43	66.7	8907900000	14871000000	7677900000	10556000000	7433600000	7071200000	10407000000	8706200000	6926000000	8789400000	7082300000	9938000000
P23447	Flagellar M-ring protein	fliF	181.66	30.2	1120800000	1482700000	1447100000	1006500000	1530800000	1179400000	1394700000	1612500000	1522500000	1759300000	1653000000	1721500000
P23448	Flagellar motor switch protein FliG	fliG	120.54	31.7	1157200000	665380000	1273200000	1545400000	1045900000	1363300000	1824500000	1382200000	1471500000	1535500000	1589900000	1623300000
P23449	Probable flagellar assembly protein FliH	fliH	7.4335	12.5	0	0	0	0	0	0	455910000	0	505580000	368970000	0	0
P23452	Flagellar protein FliL	fliL	20.662	16.4	0	0	0	0	0	0	0	75146000	119430000	0	0	0
P23453	Flagellar motor switch protein FliM	fliM	35.496	36.1	281410000	0	249970000	199920000	188760000	192980000	283850000	244500000	246810000	220800000	282630000	351050000
P23454	FlaA locus 22.9 kDa protein	ylxF	32.413	43.1	190060000	435260000	189000000	126930000	101880000	175130000	231400000	238190000	0	127390000	0	182440000
P23477	ATP-dependent helicase/deoxyribonuclease subunit B	addB	23.213	10.3	0	248950000	0	0	0	0	0	0	0	0	0	0
P23478	ATP-dependent helicase/nuclease subunit A	addA	28.728	12.3	534590000	667840000	0	637770000	0	0	0	0	0	0	0	0
P23479	Nuclease SbcCD subunit D	sbcD	6.8319	16.4	0	0	141790000	0	0	0	0	0	0	0	0	0
P23545	Alkaline phosphatase synthesis sensor protein PhoR	phoR	52.085	16.9	344400000	388530000	203610000	135450000	198410000	112830000	207230000	196200000	185890000	121070000	102550000	178110000
P23630	Diaminopimelate decarboxylase	lysA	199.47	42.4	1887300000	3001500000	1795200000	1088600000	1097200000	986300000	1291600000	1283800000	1251300000	1146500000	1621200000	1315200000
P23789	HTH-type transcriptional regulator Xre	xre	5.0934	11.5	0	0	79331000	0	0	0	0	0	0	0	0	0
P23914	Transcriptional regulatory protein LevR;Putative phosphotransferase EIIA component	levR	19.941	6	85164000	109920000	130570000	122710000	83788000	96535000	87322000	81472000	104260000	106350000	0	88484000
P23966	1,4-dihydroxy-2-naphthoyl-CoA synthase	menB	210.21	36.9	8406500000	7217400000	13325000000	11480000000	12062000000	12033000000	10739000000	10265000000	12642000000	12052000000	10589000000	10923000000
P23970	2-succinyl-5-enolpyruvyl-6-hydroxy-3-cyclohexene-1-carboxylate synthase	menD	7.2756	7.9	0	0	84359000	0	0	0	0	0	73937000	73806000	0	67095000
P23971	2-succinylbenzoate--CoA ligase	menE	11.896	8.8	0	0	94773000	0	0	0	0	0	0	0	0	0
P23973	Isochorismate synthase MenF	menF	39.059	24	356130000	320210000	278690000	181140000	196190000	156390000	186940000	263670000	211130000	200490000	298260000	334590000
P23974	Putative 2-succinyl-6-hydroxy-2,4-cyclohexadiene-1-carboxylate synthase	menH	17.884	21.2	112680000	93697000	90858000	0	0	0	0	0	0	0	0	0
P24010	Cytochrome c oxidase subunit 1	ctaD	17.828	12.4	0	0	410540000	648200000	814470000	813260000	0	889990000	909250000	0	557000000	390740000
P24011	Cytochrome c oxidase subunit 2	ctaC	104.2	43	1299400000	852480000	651050000	1260800000	1014100000	1379500000	1897700000	1663900000	1374600000	663270000	817280000	1372500000
P24012	Cytochrome c oxidase subunit 3	ctaE	14.77	13	0	626190000	0	0	0	0	901230000	900780000	765860000	587100000	0	682680000
P24013	Cytochrome c oxidase subunit 4B	ctaF	3.3919	10	0	0	0	0	0	0	0	0	0	0	0	54671000
P24072	Chemotaxis protein CheY	cheY	95.863	96.7	1199800000	3110300000	1011400000	1236400000	1128400000	1313300000	1541900000	1251500000	1215200000	1003400000	1473700000	1769700000
P24073	Flagellar motor switch phosphatase FliY	fliY	61.361	25.9	1424000000	0	1291700000	1403900000	1145100000	1226000000	1716900000	1427400000	1274500000	1389000000	1206300000	1506100000
P24136	Oligopeptide transport ATP-binding protein OppD	oppD	180.15	64.5	8846500000	4617600000	11272000000	10472000000	11957000000	12463000000	9026700000	7982600000	10213000000	7453200000	6974000000	7523900000
P24137	Oligopeptide transport ATP-binding protein OppF	oppF	268.46	68.2	3774900000	2482200000	5080700000	6132200000	7639900000	7064300000	4773600000	4372100000	5359800000	4488500000	4474800000	4806800000
P24138	Oligopeptide transport system permease protein OppB	oppB	75.331	11.3	2267600000	987300000	2100800000	1979300000	2358500000	2185000000	1717200000	1583800000	1850200000	1342200000	1055500000	1980800000
P24139	Oligopeptide transport system permease protein OppC	oppC	63.975	25.2	3613900000	5005900000	3233000000	2401300000	2305900000	2203700000	1850300000	1753200000	2091400000	1352700000	1233300000	1667100000
P24141	Oligopeptide-binding protein OppA	oppA	323.31	66.6	94758000000	102480000000	87715000000	97848000000	97173000000	99043000000	91562000000	93628000000	83791000000	64829000000	62571000000	72552000000
P24219	RNA polymerase sigma-54 factor	sigL	11.287	21.3	81092000	0	95462000	0	0	0	0	0	0	0	0	0
P24277	Recombination protein RecR	recR	14.188	47.5	599320000	671970000	381500000	200460000	0	203790000	250510000	201730000	0	0	0	152100000
P24281	Nucleoid-associated protein YaaK	yaaK	257.79	55.1	4187100000	4267400000	3519800000	5745200000	4794100000	3983200000	6356900000	5163500000	4285900000	7574800000	6795500000	6275000000
P24327	Foldase protein PrsA	prsA	323.31	84.2	47221000000	60764000000	48793000000	54950000000	52206000000	52707000000	64040000000	59049000000	56778000000	51092000000	47539000000	59253000000
P24469	Cytochrome c-550	cccA	21.594	40	326720000	0	0	1304000000	1222500000	1097400000	1561000000	1533700000	1257100000	725200000	879300000	1034700000
P24500	Flagellar basal body rod protein FlgB	flgB	4.6483	13.2	0	55526000	0	0	0	0	0	0	0	0	0	0
P24501	Flagellar basal-body rod protein FlgC	flgC	18.36	31.3	0	201940000	0	0	0	0	0	0	0	0	0	0
P24809	Uncharacterized protein YqxJ	yqxJ	1.7582	6.7	0	0	0	0	0	0	0	0	0	0	176340000	0
P24812	Uncharacterized protein YqxI	yqxI	55.594	35.2	0	0	0	0	526730000	0	772380000	704570000	767810000	929210000	557610000	923550000
P25052	Aminopyrimidine aminohydrolase	tenA	323.31	77.1	22603000000	12422000000	20755000000	20386000000	19384000000	19956000000	13414000000	13200000000	13963000000	10928000000	9428500000	11073000000
P25053	Thiazole tautomerase	tenI	67.033	43.9	740110000	0	1033300000	428420000	0	0	0	0	0	0	0	0
P25144	Catabolite control protein A	ccpA	65.978	31.1	6382000000	8406700000	3384900000	4146200000	3791200000	3212500000	3649600000	5734700000	3334600000	2834800000	3687700000	4664900000
P25148	General stress protein A	gspA	12.908	7.7	0	0	122300000	0	0	116070000	0	0	0	0	0	0
P25152	Aminopeptidase YwaD	ywaD	243.88	35.8	598540000	0	239720000	2603900000	2466900000	1786200000	1721700000	2568400000	1945100000	3435800000	2972200000	3070700000
P25499	Heat-inducible transcription repressor HrcA	hrcA	20.581	28.3	291060000	182440000	292690000	177940000	0	214120000	195230000	224630000	0	167300000	157390000	213790000
P25503	Urocanate hydratase	hutU	30.275	19.7	764450000	924820000	631350000	698040000	864230000	862980000	635400000	660570000	568850000	205570000	242410000	0
P25811	tRNA modification GTPase MnmE	mnmE	166.91	30.7	2744600000	2063000000	3205800000	2360700000	1955800000	2171500000	2119900000	2086100000	2018500000	2382400000	2008500000	2031100000
P25812	tRNA uridine 5-carboxymethylaminomethyl modification enzyme MnmG	mnmG	252.56	54.6	3729600000	3566800000	3132300000	2184100000	2596200000	2364400000	2578800000	2383800000	2205000000	2737800000	2235100000	2287500000
P25813	Ribosomal RNA small subunit methyltransferase G	rsmG	55.291	28.9	587520000	968100000	505050000	538020000	433580000	448730000	611030000	576100000	517560000	518400000	456700000	552590000
P25814	Ribonuclease P protein component	rnpA	20.861	26.7	0	92884000	0	0	0	0	0	0	0	0	0	0
P25971	Orotidine 5-phosphate decarboxylase	pyrF	154.84	70.7	3378800000	4751100000	3668800000	1301200000	1238000000	1257000000	1585800000	1638100000	1546400000	2506800000	2825800000	2180900000
P25972	Orotate phosphoribosyltransferase	pyrE	159.22	35.2	2830600000	2816600000	2792700000	0	0	0	0	0	962500000	1912100000	1963400000	1410800000
P25993	Carbamoyl-phosphate synthase pyrimidine-specific small chain	pyrAA	289.39	45.9	4253100000	6517200000	3443800000	824710000	604450000	971260000	1017600000	996870000	1097000000	1574900000	1193500000	1366100000
P25994	Carbamoyl-phosphate synthase pyrimidine-specific large chain	pyrAB	323.31	41.4	17008000000	11967000000	16050000000	7586900000	6628400000	7241500000	8845100000	7897000000	8216300000	14416000000	11942000000	11951000000
P25995	Dihydroorotase	pyrC	96.629	40.7	1324300000	1031400000	1361100000	1159000000	1009800000	819520000	1339500000	1493000000	1365200000	1876700000	1102300000	1604400000
P25996	Dihydroorotate dehydrogenase B (NAD(+)), catalytic subunit	pyrD	38.105	24.4	1331900000	1900800000	1434300000	0	0	0	470510000	0	349220000	408390000	379890000	519570000
P26380	Fructose-specific phosphotransferase enzyme IIB component	levE	19.961	21.5	207270000	220600000	283380000	151610000	159530000	161620000	232010000	181020000	216570000	0	0	218460000
P26497	Stage 0 sporulation protein J	spo0J	267.9	68.4	4695600000	4846400000	4907700000	3540100000	3165500000	3364000000	3406400000	3449000000	3326100000	3774000000	3694200000	3364900000
P26899	Aspartate ammonia-lyase	ansB	95.95	30.7	1249000000	1719500000	1224800000	723030000	842100000	901710000	1131900000	985460000	952640000	1077600000	1026100000	1088600000
P26900-2;P26900	L-asparaginase 1	ansA	20.984	29.3	0	0	0	0	0	0	0	0	0	0	88195000	0
P26901	Vegetative catalase	katA	8.5674	10.4	0	0	0	0	0	0	120630000	186150000	0	0	0	0
P26902	D-aminopeptidase	dppA	19.053	15.3	113070000	0	0	0	408110000	0	0	0	0	0	0	0
P26906	Dipeptide-binding protein DppE	dppE	46.883	17.7	510250000	575840000	0	450870000	669350000	628320000	0	400680000	0	0	0	0
P26907	Glucose starvation-inducible protein B	gsiB	323.31	95.9	9513200000	1469800000	7849800000	33130000000	26737000000	24327000000	27915000000	18144000000	15302000000	15724000000	20898000000	22543000000
P26908	50S ribosomal protein L21	rplU	147.76	53.9	18979000000	26418000000	14196000000	14945000000	16593000000	17125000000	19432000000	15365000000	15785000000	21732000000	17247000000	21793000000
P26935	Inositol 2-dehydrogenase/D-chiro-inositol 3-dehydrogenase	iolG	12.475	12.8	0	0	114830000	0	138010000	0	0	0	97223000	0	0	0
P27206	Surfactin synthase subunit 1	srfAA	323.31	51.4	23829000000	38072000000	28693000000	22930000000	20519000000	21063000000	29156000000	26536000000	25247000000	36097000000	34284000000	35208000000
P27620	Putative N-acetylmannosaminyltransferase	tagA	3.2639	16.4	37705000	0	0	0	0	0	0	0	0	0	0	0
P27621	Putative CDP-glycerol:glycerophosphate glycerophosphotransferase	tagB	33.926	17.6	174120000	117930000	147190000	70362000	110070000	101630000	77705000	73153000	109330000	80511000	80257000	69384000
P27623	Glycerol-3-phosphate cytidylyltransferase	tagD	49.462	30.2	2564800000	2103300000	2779200000	1832900000	1701900000	1612900000	2127800000	2271600000	1862400000	2430600000	2354700000	2357700000
P27876	Triosephosphate isomerase	tpiA	323.31	87	110520000000	82972000000	81118000000	99228000000	92400000000	81756000000	101110000000	88906000000	82489000000	99270000000	98310000000	107610000000
P28015	Putative septation protein SpoVG	spoVG	133.04	86.6	18625000000	20763000000	13813000000	31019000000	25198000000	24846000000	30249000000	27454000000	26287000000	24094000000	22977000000	26653000000
P28264	Cell division protein FtsA	ftsA	281.42	57.3	4032500000	4469200000	4823900000	2988100000	3593000000	3739900000	3476000000	3084400000	3792600000	4253500000	3538000000	3510300000
P28366	Protein translocase subunit SecA	secA	323.31	64.9	32885000000	27701000000	32156000000	23783000000	21034000000	22341000000	22870000000	21434000000	23147000000	25344000000	23334000000	23928000000
P28367	Peptide chain release factor 2	prfB	230.37	48.9	5124600000	9097000000	5239400000	3696600000	3316200000	3533200000	3779100000	3776100000	3707900000	4125300000	4262900000	5086000000
P28368	Putative sigma-54 modulation protein	yvyD	323.31	54	12572000000	9419500000	13809000000	18911000000	16232000000	15918000000	22524000000	17255000000	16919000000	22435000000	23597000000	27788000000
P28598	60 kDa chaperonin	groL	323.31	89.3	216260000000	196590000000	158470000000	260330000000	281910000000	265720000000	268630000000	271100000000	260500000000	204480000000	212590000000	225660000000
P28599	10 kDa chaperonin	groS	129.43	100	10840000000	8107700000	10472000000	21726000000	18626000000	16730000000	20092000000	17156000000	17936000000	14203000000	12984000000	18739000000
P28611	Motility protein A	motA	34.888	26.3	903220000	1581800000	744780000	732630000	710480000	613280000	665320000	580140000	683730000	907670000	941860000	913830000
P28612	Motility protein B	motB	29.506	18	0	0	0	0	0	0	0	0	0	0	0	226690000
P28618	Pyrrolidone-carboxylate peptidase	pcp	21.161	33.5	249750000	527600000	0	395700000	413900000	358750000	388880000	327150000	352100000	318240000	358600000	375570000
P28619	Ribonuclease PH	rph	35.788	24.1	166990000	0	0	0	0	0	201180000	203920000	0	0	0	213910000
P28628	Signal peptidase I S	sipS	13.976	21.2	403210000	388200000	495740000	429180000	350640000	433050000	430440000	385050000	479370000	280500000	382130000	278880000
P28819	Aminodeoxychorismate/anthranilate synthase component 2	pabA	43.679	31.4	0	0	164460000	112060000	0	109020000	154170000	105940000	113860000	161350000	197420000	155180000
P28820	Aminodeoxychorismate synthase component 1	pabB	88.705	22.6	1016700000	1014100000	968670000	0	530990000	0	0	485040000	0	784690000	786960000	598540000
P28822	Dihydropteroate synthase	sul	38.913	27	643370000	0	1028900000	0	0	0	0	0	0	0	0	333060000
P28823	Dihydroneopterin aldolase	folB	7.306	25.8	1279700000	1447500000	1298900000	1225100000	1582100000	1574200000	1296500000	1311300000	1300100000	1431200000	1104000000	879090000
P29072	Chemotaxis protein CheA	cheA	210.78	20.8	3375900000	6548400000	3485400000	2622100000	2464800000	2599100000	3082400000	2966100000	3001200000	3023200000	2710100000	2801900000
P29141	Minor extracellular protease vpr	vpr	323.31	42.6	11404000000	6653300000	5734800000	22167000000	21184000000	19973000000	14423000000	16654000000	14893000000	11891000000	11481000000	10444000000
P29726	Adenylosuccinate synthetase	purA	323.31	74.2	39142000000	34629000000	42809000000	36103000000	37405000000	40159000000	33316000000	32885000000	37877000000	46186000000	48975000000	40003000000
P29727	GMP synthase [glutamine-hydrolyzing]	guaA	323.31	48.5	8134500000	8968200000	6613300000	6373700000	6458700000	6212200000	7042200000	7387300000	6274100000	7113700000	7218600000	8574100000
P30300	Glycerol uptake operon antiterminator regulatory protein	glpP	4.1413	5.7	0	0	0	0	0	0	0	0	0	78870000	0	0
P30949	Glutamate-1-semialdehyde 2,1-aminomutase	hemL	177.76	46.7	9295400000	16100000000	9427700000	7731900000	7781600000	8217000000	11059000000	10712000000	10454000000	9008200000	8508700000	9768800000
P30950	Delta-aminolevulinic acid dehydratase	hemB	94.003	42.3	964150000	0	0	2116400000	2275900000	1641100000	2724100000	2417600000	2185300000	2591400000	3035900000	2873700000
P31080	LexA repressor	lexA	123.17	66.3	1517700000	1397800000	2502900000	1614100000	1587500000	1481100000	1532500000	1212400000	1612900000	1930500000	2246900000	1801700000
P31102	3-dehydroquinate synthase	aroB	87.05	47.2	2591900000	3834500000	2268500000	2431100000	2542700000	2249700000	2777700000	2732900000	2513600000	2023200000	1876400000	2202900000
P31103	Nucleoside diphosphate kinase	ndk	135.13	61.1	7038900000	14914000000	9699400000	29280000000	32928000000	32804000000	34350000000	32665000000	35986000000	33057000000	33490000000	27784000000
P31104	Chorismate synthase	aroC	323.31	51.8	13918000000	23157000000	16866000000	7538000000	7066500000	8025700000	7620800000	7097500000	7727400000	8481900000	7899500000	8029500000
P31105	Chemotaxis protein methyltransferase	cheR	28.657	37.5	720410000	654380000	834920000	315350000	327300000	243300000	321850000	259910000	318760000	397920000	457190000	409830000
P31112	Heptaprenyl diphosphate synthase component 1	hepS	60.32	28.3	1627200000	1295300000	1532800000	649130000	490330000	582740000	754610000	580760000	588370000	622200000	425340000	561370000
P31113	Demethylmenaquinone methyltransferase	menG	49.75	42.9	280690000	0	271350000	286270000	385850000	316930000	280390000	228610000	301650000	332170000	0	380960000
P31847	Uncharacterized protein YpuA	ypuA	65.837	52.8	921770000	1759600000	1135000000	1907100000	1510100000	1551700000	1392000000	1429600000	1161200000	1357500000	1239900000	1113200000
P32081	Cold shock protein CspB	cspB	238.18	61.2	12012000000	3431900000	7840600000	25709000000	18554000000	18092000000	22741000000	22279000000	14380000000	22606000000	21868000000	27632000000
P32393	ComE operon protein 2	comEB	7.0808	25.9	0	0	64873000	0	0	0	0	0	0	0	0	0
P32395	Uroporphyrinogen decarboxylase	hemE	153.07	43.1	1481400000	1454900000	1419200000	4359400000	4644900000	4475900000	6015200000	4632200000	6089800000	6453100000	6240800000	4800400000
P32396	Ferrochelatase	hemH	83.043	29	812950000	0	0	2698200000	2789800000	2775700000	5028700000	3721700000	3703200000	4778300000	6136800000	6457400000
P32397	Protoporphyrinogen oxidase	hemY	211.04	52.1	4039900000	8237800000	4138200000	4162300000	3630900000	3962300000	5038000000	5207800000	4902500000	5719800000	4769500000	5192200000
P32436	Protein DegV	degV	108.18	44.1	1865600000	1254000000	3055400000	1939200000	2159100000	2158900000	1707500000	1567100000	1744700000	2092100000	2086800000	2063600000
P32437	IMPACT family member YvyE	yvyE	72.76	48.4	1354100000	2307100000	1114800000	928430000	694090000	753150000	1131000000	1049100000	822610000	1168400000	757150000	1177000000
P32726	Ribosome maturation factor RimP	rimP	13.689	41.7	255850000	561970000	0	0	0	0	0	0	0	0	0	363530000
P32727	Transcription termination/antitermination protein NusA	nusA	323.31	46.9	14677000000	18156000000	11966000000	10526000000	8199300000	9187900000	10345000000	9255500000	8993700000	12465000000	11861000000	11783000000
P32728	Uncharacterized protein YlxR	ylxR	3.8675	26.4	65450000	0	0	0	0	0	0	0	0	0	0	154680000
P32731	Ribosome-binding factor A	rbfA	36.985	60.7	1086100000	1265800000	857270000	1223500000	993680000	908440000	899920000	1026400000	975830000	1168300000	1031000000	803650000
P32732	tRNA pseudouridine synthase B	truB	39.357	18.4	171800000	182720000	0	0	147380000	159520000	0	0	0	0	169790000	181340000
P32959	Penicillin-binding protein 4*	pbpE	64.971	35.9	1631200000	1286100000	1433700000	1304700000	1061100000	1218000000	974950000	965530000	983250000	874760000	1212500000	868240000
P32960	Probable amino-acid racemase	racX	37.4	24.2	906370000	791770000	918200000	338220000	0	541760000	393930000	447780000	0	0	387820000	395910000
P33166	Elongation factor Tu	tuf	323.31	89.6	440330000000	346380000000	532780000000	420000000000	463470000000	477180000000	443790000000	405500000000	471520000000	509720000000	434530000000	431390000000
P33189	Uncharacterized aminotransferase YhxA	yhxA	275.31	58.2	2466000000	2556900000	2489100000	2149800000	1814200000	2115000000	2086400000	2239300000	2193500000	1855700000	1659200000	1636500000
P33911	Carbon storage regulator homolog	csrA	3.4512	36.5	279910000	255630000	0	0	0	0	0	0	0	0	0	0
P34956	Quinol oxidase subunit 1	qoxB	70.484	10.8	7874500000	13735000000	9327200000	11737000000	13283000000	15068000000	12065000000	10745000000	12756000000	8673900000	13448000000	13632000000
P34957	Quinol oxidase subunit 2	qoxA	323.31	53.9	34361000000	41052000000	29998000000	27709000000	36791000000	35821000000	28942000000	28554000000	36976000000	35147000000	44956000000	31947000000
P34958	Quinol oxidase subunit 3	qoxC	54.963	14.7	2111700000	2083000000	3286700000	2534800000	2309100000	2721100000	3325700000	2185800000	2428500000	5075300000	4248100000	2561500000
P35136	D-3-phosphoglycerate dehydrogenase	serA	323.31	68	32749000000	49063000000	34612000000	24148000000	24026000000	23225000000	24424000000	22554000000	22766000000	21757000000	20150000000	28063000000
P35137	Peptidyl-prolyl cis-trans isomerase B	ppiB	158.91	77.6	8472200000	7401300000	7125500000	10379000000	7506900000	7952900000	10092000000	7374400000	7866000000	6734900000	8727600000	12874000000
P35146	3-dehydroquinate dehydratase	aroD	16.577	53.3	257590000	232080000	293880000	300700000	408270000	375280000	319650000	347780000	377660000	301780000	0	239540000
P35154	Segregation and condensation protein A	scpA	3.6491	15.1	0	86362000	0	0	0	0	0	0	0	0	0	0
P35155	Segregation and condensation protein B	scpB	11.014	29.9	0	0	0	0	0	0	0	0	0	0	93765000	0
P35156	Uncharacterized protein YpuI	ypuI	6.2736	6.1	0	0	231000000	0	0	0	0	0	0	0	0	0
P35159	Ribosomal large subunit pseudouridine synthase B	rluB	105.76	48.8	2568600000	5242900000	2271800000	1970700000	1925800000	1759000000	1795800000	2362600000	2282300000	1184800000	1437500000	1588400000
P35160	Thiol-disulfide oxidoreductase ResA	resA	11.838	48	0	0	0	597220000	582600000	519530000	567620000	555630000	528030000	646430000	624470000	528740000
P35161	Cytochrome c biogenesis protein ResB	resB	43.317	31.4	0	0	0	409080000	503220000	528170000	467140000	429660000	564960000	455900000	503490000	533600000
P35162	Cytochrome c biogenesis protein ResC	resC	64.971	15.3	0	0	156010000	328320000	343650000	436860000	382320000	358810000	466290000	624620000	650350000	411580000
P35163	Transcriptional regulatory protein ResD	resD	289.82	56.7	9013800000	10128000000	10060000000	9315200000	7654700000	8421600000	12790000000	11267000000	10698000000	9751900000	9972900000	12836000000
P35164	Sensor histidine kinase ResE	resE	67.303	20	575230000	659840000	559970000	690020000	659820000	629070000	896850000	742180000	751340000	843450000	736690000	772690000
P35165	RNA polymerase sigma factor SigX	sigX	7.4467	20.6	78106000	0	0	0	0	0	0	0	0	0	0	0
P35166	Sigma-X negative effector	rsiX	33.678	16.3	534830000	446170000	226490000	197250000	0	0	322450000	221220000	290080000	255050000	128730000	285580000
P35620	Flagellar biosynthesis protein FlhA	flhA	5.6668	10.8	86072000	0	0	0	0	0	0	0	0	0	0	0
P36430	Leucine--tRNA ligase	leuS	290.65	40.4	5579900000	7297900000	4945300000	6706400000	5515800000	5904300000	7297600000	6680500000	6009100000	6039300000	5688800000	6022500000
P36839	Acetylornithine aminotransferase	argD	9.4677	15.3	111060000	126240000	110630000	136610000	130480000	143800000	0	185080000	0	0	0	0
P36843	Arginine biosynthesis bifunctional protein ArgJ;Glutamate N-acetyltransferase;Amino-acid acetyltransferase;Arginine biosynthesis bifunctional protein ArgJ alpha chain;Arginine biosynthesis bifunctional protein ArgJ beta chain	argJ	22.514	11.8	0	0	61118000	0	0	0	0	0	0	0	0	0
P36945	Ribokinase	rbsK	9.9867	11.6	0	239800000	0	0	0	0	0	0	0	0	0	0
P37104	UPF0122 protein YlxM	ylxM	4.5644	18.2	0	88411000	0	0	0	0	0	0	0	0	0	0
P37105	Signal recognition particle protein	ffh	323.31	62.8	10238000000	14592000000	10999000000	7895900000	8173100000	8546200000	7993200000	7391000000	9548400000	9010600000	7957900000	8414300000
P37251	Acetolactate synthase large subunit	ilvB	68.336	30.1	1679300000	1565500000	2415100000	1489300000	2180700000	2476800000	1553100000	1338500000	1301500000	1651400000	1410100000	1534600000
P37252	Acetolactate synthase small subunit	ilvH	22.454	18.6	564120000	508040000	0	0	0	0	0	411720000	0	0	0	307040000
P37253	Ketol-acid reductoisomerase	ilvC	323.31	72.8	11500000000	10439000000	12683000000	23057000000	26604000000	25767000000	21104000000	22184000000	21215000000	19389000000	17821000000	19495000000
P37437	50S ribosomal protein L9	rplI	251.45	91.3	8283600000	7779800000	8598300000	12127000000	10009000000	12507000000	13952000000	11268000000	11543000000	11584000000	11320000000	11298000000
P37454	Exodeoxyribonuclease	exoA	18.41	9.9	94012000	0	0	0	0	0	0	0	0	0	0	0
P37455	Single-stranded DNA-binding protein A	ssbA	129.74	69.8	3903300000	7553700000	3015500000	3964000000	3354500000	3178900000	3144400000	3914600000	3210100000	2911300000	2767600000	3566200000
P37464	Serine--tRNA ligase	serS	311.04	61.2	9435800000	13203000000	15246000000	11240000000	10697000000	12688000000	9749200000	9002600000	11566000000	13179000000	10639000000	11273000000
P37465	Methionine--tRNA ligase	metG	323.31	64.5	23547000000	20357000000	21777000000	15489000000	16801000000	16320000000	17542000000	16158000000	16520000000	17714000000	15280000000	14864000000
P37466	Protein Veg	veg	6.0031	10.5	0	0	14513000	0	0	0	0	0	0	0	0	0
P37467	Protein XpaC	xpaC	6.9765	10.3	0	91527000	0	0	0	0	0	0	0	0	0	0
P37468	Ribosomal RNA small subunit methyltransferase A	rsmA	35.234	30.8	582490000	764920000	521260000	0	334000000	308940000	0	0	344280000	0	0	0
P37469	Replicative DNA helicase	dnaC	17.991	17.2	414150000	476020000	0	478050000	475840000	0	0	516480000	0	0	0	0
P37470	Peptidyl-tRNA hydrolase	spoVC	46.781	47.9	283160000	0	191280000	564890000	624210000	546600000	479810000	454460000	416300000	671400000	532370000	479310000
P37472	Hypoxanthine-guanine phosphoribosyltransferase	hprT	108.16	52.2	10485000000	8336400000	10100000000	15983000000	15796000000	15453000000	15817000000	15331000000	15646000000	14652000000	14057000000	14503000000
P37474	Transcription-repair-coupling factor	mfd	314.45	37.6	3177100000	2775400000	3128900000	2165200000	1837800000	2050000000	2109300000	2007500000	1793400000	2251300000	1894300000	2520500000
P37476	ATP-dependent zinc metalloprotease FtsH	ftsH	323.31	54.6	29076000000	27721000000	30630000000	26537000000	21449000000	22569000000	24258000000	21196000000	21508000000	25692000000	19620000000	22371000000
P37477	Lysine--tRNA ligase	lysS	323.31	56.9	15332000000	18582000000	17090000000	14476000000	12210000000	14075000000	15891000000	13760000000	13587000000	17439000000	14595000000	16204000000
P37478	Transcriptional regulatory protein YycF	yycF	161.31	48.1	2490200000	2325300000	3316000000	2272400000	1966900000	2314000000	2177300000	1792700000	2095500000	2041800000	1929000000	2103400000
P37484	Uncharacterized protein YybT	yybT	37.79	13.1	347900000	415920000	0	0	214430000	0	0	0	0	191690000	0	0
P37485	Uncharacterized protein YybS	yybS	2.3461	6.8	0	167480000	0	0	0	0	0	0	0	0	0	0
P37487	Manganese-dependent inorganic pyrophosphatase	ppaC	323.31	78.3	15624000000	11260000000	15875000000	20119000000	21054000000	21576000000	22238000000	20295000000	20760000000	22051000000	21128000000	21880000000
P37490	Uncharacterized protein YybN	yybN	84.565	10.3	1393300000	1250400000	0	0	0	0	0	0	0	0	0	0
P37494	Uncharacterized ABC transporter ATP-binding protein YybJ	yybJ	287.75	67.4	12221000000	15893000000	14169000000	8156200000	8261400000	8884100000	7443900000	7632900000	8128500000	7830400000	6725200000	7266300000
P37502	Probable metallo-hydrolase YybB	yybB	3.9857	11.8	0	0	0	0	0	0	0	376450000	0	1485300000	0	0
P37504	Uncharacterized protein YyaT	yyaT	16.248	25.7	0	0	0	0	0	0	0	0	0	93957000	0	0
P37513	Uncharacterized protein YyaK	yyaK	7.8484	5	0	0	139620000	0	0	0	0	0	0	0	0	0
P37517	Catabolite control protein B	ccpB	12.319	5.1	0	0	0	0	0	0	0	0	0	0	28834000	0
P37518	Ribosome-binding ATPase YchF	ychF	253.07	58.7	9322000000	10327000000	7745100000	6181400000	6143300000	6321700000	7447200000	6449300000	6118600000	7902800000	8197900000	7615700000
P37522	Sporulation initiation inhibitor protein Soj	soj	135.51	48.2	1966200000	504670000	2926400000	2191800000	2780200000	3102200000	1919500000	1864600000	2220100000	2738500000	2990100000	2553600000
P37523	Uncharacterized protein YyaB	yyaB	2.6777	9.6	0	0	0	0	0	0	0	0	0	0	32791000	0
P37524	Nucleoid occlusion protein	noc	158.76	38.2	780840000	1182200000	1046200000	765360000	837580000	833710000	827840000	537040000	739960000	687930000	706960000	751890000
P37525	Uncharacterized protein YaaB	yaaB	3.469	16	0	0	0	0	0	64750000	0	0	0	0	0	0
P37527	Pyridoxal 5-phosphate synthase subunit PdxS	pdxS	323.31	74.8	23941000000	24574000000	23628000000	48130000000	55749000000	51822000000	50122000000	52726000000	49278000000	48361000000	47162000000	49586000000
P37528	Pyridoxal 5-phosphate synthase subunit PdxT	pdxT	225.43	57.1	644430000	0	744920000	1452900000	1934700000	1570600000	1200000000	789300000	1392500000	2671000000	3506500000	1620500000
P37529	Deoxyadenosine/deoxycytidine kinase	dck	114.6	45.2	1377200000	2122800000	1280000000	978720000	798940000	922100000	1173500000	1083100000	954240000	1022300000	1009500000	1196700000
P37530	Deoxyguanosine kinase	dgk	8.9817	35.3	0	0	357360000	0	0	0	0	0	0	0	0	0
P37535	Uncharacterized protein YaaN	yaaN	115.47	45.3	1583100000	2295600000	1756800000	1229800000	1087300000	1169600000	1300300000	1191400000	1227300000	1218100000	845540000	646960000
P37536	Uncharacterized protein YaaO	yaaO	2.2598	7.7	22193000	0	0	0	0	0	0	0	0	0	0	0
P37537	Thymidylate kinase	tmk	12.49	36.8	0	0	0	0	0	0	36437000	0	0	0	24817000	0
P37538	Uncharacterized protein YaaQ	yaaQ	36.738	38.5	1716100000	1678600000	1191400000	1679700000	2600200000	1612600000	1120500000	1861800000	1800700000	1223700000	1151000000	763770000
P37539	Uncharacterized protein YaaR	yaaR	3.0526	24	0	0	0	25551000	0	0	0	0	0	0	0	0
P37540	DNA polymerase III subunit delta	holB	17.163	21.9	328570000	0	231690000	0	0	0	0	0	138670000	0	0	0
P37541	Stage 0 sporulation protein YaaT	yaaT	27.669	47.6	246640000	434050000	395230000	0	0	265550000	223610000	193960000	0	231440000	0	230970000
P37542	Initiation-control protein YabA	yabA	81.55	25.2	336860000	358490000	289260000	0	0	0	0	0	0	0	0	0
P37543	Uncharacterized protein YabB	yabB	18.718	18.6	323070000	899080000	0	212410000	0	0	0	0	0	0	0	0
P37544	Ribosomal RNA small subunit methyltransferase I	rsmI	10.771	16.8	0	0	0	0	0	0	0	52532000	0	0	0	0
P37545	Uncharacterized deoxyribonuclease YabD	yabD	29.374	21.6	494810000	548430000	428700000	608850000	701180000	620030000	474600000	625260000	485030000	521980000	611180000	453860000
P37547	Ribonuclease M5	rnmV	12.769	36	0	0	55718000	0	0	0	0	0	0	0	0	44169000
P37550	4-diphosphocytidyl-2-C-methyl-D-erythritol kinase	ispE	31.643	52.2	1415400000	2535700000	697700000	861460000	0	0	746730000	0	738850000	0	836080000	672160000
P37551	Pur operon repressor	purR	82.712	41.8	0	0	202670000	0	0	0	0	0	0	230500000	305530000	0
P37552	2-iminobutanoate/2-iminopropanoate deaminase	yabJ	39.506	28.8	1362600000	830830000	939600000	1587200000	917690000	1103100000	868310000	805180000	686610000	0	0	751420000
P37556	Uncharacterized protein YabN	yabN	24.077	23.3	0	0	0	0	293520000	478970000	0	0	0	0	0	0
P37557	Uncharacterized protein YabO	yabO	26.275	29.1	400420000	800890000	525390000	446700000	0	373240000	438110000	290480000	258620000	406720000	0	356240000
P37560	Uncharacterized protein YabR	yabR	122.89	50.8	3608300000	880610000	4356500000	2231800000	2717500000	2768300000	1993500000	1469000000	2388600000	3282400000	1673300000	1677400000
P37563	tRNA(Ile)-lysidine synthase	tilS	3.4182	10.2	0	0	0	0	0	0	0	0	0	0	0	807640000
P37564	Type III pantothenate kinase	coaX	16.311	14.3	365630000	360840000	328470000	0	0	0	0	0	125550000	0	0	0
P37565	33 kDa chaperonin	hslO	157.49	59.5	1261200000	1846300000	694120000	906880000	1035000000	796380000	1098700000	1147000000	916430000	927470000	1028400000	1207500000
P37566	Putative peptidyl-prolyl cis-trans isomerase YacD	yacD	30.802	27.3	0	0	0	328680000	0	201980000	337880000	0	219170000	0	188470000	0
P37567	Probable tRNA-dihydrouridine synthase 1	dus1	12.614	11.7	0	0	257680000	0	0	0	0	0	0	0	0	0
P37568	Transcriptional regulator CtsR	ctsR	14.238	22.1	0	0	0	0	0	0	0	0	137920000	0	0	0
P37569	Protein-arginine kinase activator protein	mcsA	35.961	28.1	0	0	0	0	0	0	0	0	0	310920000	0	319760000
P37570	Protein-arginine kinase	mcsB	81.265	34.4	722910000	0	868420000	825770000	893830000	980230000	703020000	597620000	925600000	706580000	0	426640000
P37571	Negative regulator of genetic competence ClpC/MecB	clpC	323.31	76.3	41937000000	46188000000	39997000000	35263000000	35203000000	34231000000	38525000000	36269000000	36153000000	37982000000	38670000000	36753000000
P37572	DNA repair protein RadA homolog	radA	62.41	16.6	266320000	398380000	371060000	0	0	0	0	0	0	0	0	0
P37573	DNA integrity scanning protein DisA	disA	74.496	38.9	539410000	827720000	470900000	679630000	443080000	497470000	645290000	552980000	505300000	579050000	512430000	646170000
P37580	Iron(3+)-hydroxamate-binding protein FhuD	fhuD	301.46	41.6	3507200000	5034100000	5647600000	3944400000	4822500000	4982900000	3537800000	3447300000	4502300000	3039700000	3262600000	4246900000
P37582	HTH-type transcriptional regulator GlnR	glnR	27.827	26.7	250210000	470650000	136500000	89244000	102690000	77301000	55273000	104740000	71088000	60895000	69999000	139650000
P37584	Protein CsaA	csaA	44.847	40	1278100000	1136000000	954440000	2268800000	2322800000	2533100000	799930000	1150100000	1134100000	658320000	650120000	668970000
P37585	UDP-N-acetylglucosamine--N-acetylmuramyl-(pentapeptide) pyrophosphoryl-undecaprenol N-acetylglucosamine transferase	murG	136.57	66.1	3624300000	4838700000	4262000000	2427100000	2482600000	2361600000	2048500000	2184000000	2430700000	2646700000	2189300000	2178000000
P37599	Chemotaxis protein CheV	cheV	82.225	41.3	0	0	0	0	418110000	357290000	0	0	379660000	362660000	526560000	280290000
P37807	50S ribosomal protein L28	rpmB	18.947	61.3	11955000000	10140000000	7284500000	6513400000	5756500000	5419900000	6303800000	10820000000	8223600000	5250100000	4037300000	6813700000
P37808	ATP synthase subunit alpha	atpA	323.31	53	67635000000	72319000000	76536000000	109100000000	118990000000	110270000000	119230000000	114470000000	110280000000	93713000000	88992000000	101880000000
P37809	ATP synthase subunit beta	atpD	323.31	78.4	60056000000	69257000000	77803000000	101340000000	115630000000	117570000000	119010000000	120130000000	119340000000	98203000000	98054000000	103740000000
P37810	ATP synthase gamma chain	atpG	323.31	60.6	10290000000	10252000000	12780000000	17461000000	19049000000	18371000000	17560000000	16824000000	18248000000	15208000000	15095000000	11256000000
P37811	ATP synthase subunit delta	atpH	321.51	72.4	16729000000	18515000000	16152000000	26077000000	25920000000	24639000000	21918000000	26030000000	23643000000	21950000000	18118000000	19566000000
P37812	ATP synthase epsilon chain	atpC	257.09	59.8	3807200000	3342400000	4900800000	13233000000	13394000000	11692000000	13764000000	13327000000	12444000000	8784900000	13424000000	13876000000
P37813	ATP synthase subunit a	atpB	9.5838	8.2	487020000	0	0	0	592180000	632200000	601870000	299610000	468080000	192740000	0	783120000
P37814	ATP synthase subunit b	atpF	323.31	80.6	39500000000	100570000000	50109000000	61391000000	63319000000	67483000000	64899000000	62781000000	64801000000	44092000000	47900000000	51469000000
P37815	ATP synthase subunit c	atpE	36.684	22.9	1845500000	0	2009400000	1141500000	1187100000	1134100000	0	1521200000	1127300000	0	0	0
P37869	Enolase	eno	323.31	77	55949000000	56460000000	59723000000	61128000000	72302000000	68185000000	64946000000	64955000000	64307000000	67737000000	67438000000	68838000000
P37870	DNA-directed RNA polymerase subunit beta	rpoB	323.31	70.2	95990000000	103880000000	90074000000	78275000000	76127000000	79329000000	80810000000	77515000000	79042000000	78833000000	74787000000	81592000000
P37871	DNA-directed RNA polymerase subunit beta	rpoC	323.31	78.1	102740000000	119410000000	105130000000	80546000000	86360000000	87390000000	84565000000	82585000000	88056000000	94367000000	90092000000	83947000000
P37872	Uncharacterized protein YbxB	ybxB	139.99	59.2	1696500000	2534800000	673830000	1231100000	1685500000	1014600000	1181300000	1474400000	983330000	695020000	774390000	1016100000
P37874	Uncharacterized protein YgxB	ygxB	2.053	5.4	37429000	0	0	0	0	0	0	0	0	0	0	0
P37876	Uncharacterized protein YtxK	ytxK	131.27	36.8	2265900000	1902600000	3083100000	1199700000	1351800000	1681700000	1319400000	1153000000	1339100000	1277800000	1380600000	1542900000
P37877	Acetate kinase	ackA	323.31	69.9	44348000000	57838000000	48358000000	25900000000	21081000000	23302000000	30415000000	26432000000	22986000000	37012000000	31378000000	38748000000
P37887	Cysteine synthase	cysK	323.31	84.4	40690000000	37262000000	42791000000	91220000000	97103000000	89827000000	89739000000	83295000000	96312000000	112160000000	108680000000	86289000000
P37940	2-oxoisovalerate dehydrogenase subunit alpha	bfmBAA	150.1	47.6	1353900000	909410000	1303500000	1360500000	1822800000	1673800000	1700900000	1653400000	2193400000	1316000000	1356100000	1190400000
P37941	2-oxoisovalerate dehydrogenase subunit beta	bfmBAB	53.802	39.4	2003700000	1752600000	2685800000	1864600000	2281600000	2434500000	2254200000	2531300000	2655600000	1980700000	2158300000	1998500000
P37942	Lipoamide acyltransferase component of branched-chain alpha-keto acid dehydrogenase complex	bfmBB	116.17	35.4	1997900000	2820600000	1628600000	1240600000	1624200000	1802900000	1680800000	1781000000	1875000000	1232000000	1390700000	1788800000
P37944	Shikimate kinase	aroK	62.112	49.5	342910000	0	383610000	0	0	0	0	0	0	0	0	0
P37945	Lon protease 1	lon1	179.98	37	4288200000	3787900000	4738300000	3597400000	3270400000	3332000000	3404200000	3467000000	3909800000	4284300000	3862400000	3839300000
P37946	L-threonine dehydratase biosynthetic IlvA	ilvA	154.07	44.5	1895600000	2412100000	1876400000	836080000	788220000	1101100000	917040000	1009000000	755380000	1111100000	533100000	891260000
P37948	Glycerol-3-phosphate transporter	glpT	56.565	19.8	278930000	431000000	111020000	241200000	144340000	184770000	178840000	206380000	172940000	217620000	254090000	382940000
P37949	Elongation factor 4	lepA	195.33	39.1	1920500000	4000300000	2161000000	866480000	966720000	619080000	1053300000	1291300000	1179200000	1109800000	1111300000	1419600000
P37954	UvrABC system protein B	uvrB	106.51	34.6	1799900000	2310100000	1605300000	1213800000	1206700000	1227900000	1247400000	1219800000	896540000	1200900000	1041900000	1124300000
P37957	Lipase EstA	estA	152.28	50.9	3792400000	3171300000	2999100000	3790100000	3240700000	3354500000	1512100000	2021600000	1981800000	1779900000	1303100000	1615900000
P37958	Adapter protein MecA 1	mecA	6.2774	14.2	0	120170000	0	0	0	0	0	0	0	0	0	0
P37959	Uncharacterized oxidoreductase YusZ	yusZ	2.4149	10.7	0	17405000	0	0	0	0	0	0	0	0	0	0
P37960	Metalloregulation DNA-binding stress protein	mrgA	6.6706	20.3	0	0	0	0	0	0	0	0	431310000	0	0	0
P37965	Glycerophosphoryl diester phosphodiesterase	glpQ	323.31	73	27130000000	18868000000	26226000000	41306000000	34857000000	27094000000	22381000000	25349000000	14901000000	51421000000	47904000000	50417000000
P37967	Para-nitrobenzyl esterase	pnbA	112.39	36.4	3080300000	3455500000	2453700000	3947700000	4591800000	4543600000	4395100000	4207400000	3961800000	2080100000	2332100000	3421400000
P38021	Ornithine aminotransferase	rocD	323.31	53.9	13227000000	16478000000	21362000000	20009000000	22029000000	21876000000	28654000000	27452000000	29686000000	27128000000	25551000000	20178000000
P38022	Arginine utilization regulatory protein RocR	rocR	41.668	11.7	165760000	241200000	210160000	96385000	0	0	0	0	0	0	0	0
P38032	L-aspartate oxidase	nadB	148.16	37.7	1910400000	884820000	2700900000	675890000	879460000	888700000	538420000	626490000	767250000	499670000	301150000	689810000
P38033	Putative cysteine desulfurase NifS	nifS	85.148	34.7	1126600000	2772000000	1623400000	751440000	701070000	958440000	636260000	622870000	741730000	591230000	557660000	680060000
P38049	Heme-degrading monooxygenase HmoB	hmoB	34.331	16.9	3454300000	4212100000	2855900000	4212000000	2200900000	2939800000	4786600000	3881600000	2187900000	4827600000	3515600000	4160500000
P38423	Uncharacterized protein YqxK	yqxK	6.4667	20.4	0	0	0	0	0	0	0	0	0	0	0	106910000
P38424	Probable GTP-binding protein EngB	engB	95.3	53.3	482020000	0	1288200000	779700000	693730000	702710000	659450000	426950000	642030000	1136800000	1158800000	981250000
P38493	Cytidylate kinase	cmk	214.56	70.5	3331500000	6544500000	3058800000	2838100000	2454900000	2473000000	4049300000	3386500000	2719900000	3773400000	3635700000	4433000000
P38494	30S ribosomal protein S1 homolog	ypfD	323.31	74.6	28791000000	29521000000	28446000000	43705000000	44552000000	43896000000	63061000000	52260000000	44896000000	54100000000	56064000000	60523000000
P39062	Acetyl-coenzyme A synthetase	acsA	149.72	39	3643400000	4884900000	3691400000	2080900000	2066000000	2059300000	1594800000	1532500000	1818100000	1673000000	1495200000	1924000000
P39066	Acetoin utilization protein AcuB	acuB	23.647	29.4	223940000	0	0	213750000	193990000	224200000	280450000	206210000	232560000	218960000	304380000	363040000
P39070	ATP-dependent protease subunit ClpQ	clpQ	101.42	28.7	1952600000	2825700000	1784400000	2666900000	3269000000	2868300000	3716500000	3660300000	3416600000	2164200000	2187200000	2723900000
P39071	2,3-dihydro-2,3-dihydroxybenzoate dehydrogenase	dhbA	319.05	49.8	19639000000	26381000000	23927000000	19640000000	23425000000	20960000000	20241000000	22312000000	21432000000	15503000000	16401000000	17873000000
P39074	Putative lipid kinase BmrU	bmrU	3.3508	3.4	0	92713000	0	0	0	0	0	0	0	0	0	0
P39119	Citrate synthase 1	citA	26.552	30.9	439410000	0	600550000	642780000	747460000	847540000	557290000	886710000	740110000	782240000	873990000	915430000
P39120	Citrate synthase 2	citZ	323.31	62.6	57038000000	41550000000	48637000000	50324000000	47208000000	44321000000	49200000000	47946000000	44633000000	50860000000	55057000000	50182000000
P39121	Deoxyribose-phosphate aldolase	deoC	323.31	96.4	11171000000	19543000000	12328000000	13969000000	14357000000	12982000000	18336000000	17696000000	16769000000	16152000000	13879000000	17031000000
P39126	Isocitrate dehydrogenase [NADP]	icd	323.31	69.3	118790000000	112230000000	125840000000	128500000000	139390000000	133760000000	133130000000	125960000000	127330000000	142970000000	134160000000	136910000000
P39127	HTH-type transcriptional regulator CitR	citR	4.1442	21	70160000	0	0	133320000	122180000	0	110150000	121430000	0	0	102240000	86491000
P39131	UDP-N-acetylglucosamine 2-epimerase	mnaA	41.042	40	612110000	638960000	528500000	320210000	280000000	242540000	326860000	383620000	0	339810000	329740000	470540000
P39132	Uncharacterized protein YhbE	yhbE	24.71	24.9	117470000	0	0	0	0	0	0	0	0	0	0	0
P39135	4-phosphopantetheinyl transferase sfp	sfp	28.66	36.6	174910000	204700000	457870000	250340000	221160000	295140000	234980000	208530000	311010000	304260000	238410000	195880000
P39137	Amino-acid permease RocE	rocE	54.712	10.9	615720000	0	0	495740000	0	0	0	0	0	0	0	517700000
P39138	Arginase	rocF	323.31	69.9	5177600000	2771400000	5195500000	14504000000	15728000000	16071000000	16421000000	17291000000	17879000000	17808000000	17842000000	12047000000
P39140	Deoxyribonucleoside regulator	deoR	2.4169	8.9	0	0	0	0	0	0	0	0	33433000	0	0	0
P39141	Pyrimidine nucleoside transport protein	nupC	4.0643	6.1	0	0	0	0	0	0	0	0	0	0	141720000	0
P39142	Pyrimidine-nucleoside phosphorylase	pdp	290.85	47.8	10500000000	17153000000	12788000000	6365800000	5521300000	6680600000	7431900000	5883000000	6770300000	7959600000	7930500000	7054700000
P39148	Serine hydroxymethyltransferase	glyA	323.31	67.5	44922000000	25404000000	35876000000	44752000000	46559000000	44031000000	51419000000	45203000000	47789000000	53062000000	65546000000	54441000000
P39149	Uracil phosphoribosyltransferase	upp	277.43	73.2	14469000000	18823000000	12798000000	10963000000	12285000000	12952000000	9261200000	11242000000	11262000000	12601000000	12241000000	10841000000
P39153	Threonylcarbamoyl-AMP synthase	ywlC	15.263	18.2	0	0	592140000	0	0	0	0	0	0	0	0	0
P39155	Protein-arginine-phosphatase	ywlE	52.162	68.7	719190000	934690000	825790000	709150000	474180000	512030000	698720000	578700000	466430000	517360000	456830000	707220000
P39156	Putative sugar phosphate isomerase YwlF	ywlF	114.47	65.8	4134300000	3695600000	2805300000	5704300000	6037900000	6157600000	7070100000	6305400000	6690100000	6445900000	5715000000	5534600000
P39157	UPF0340 protein YwlG	ywlG	42.123	45.6	772680000	929100000	824150000	738890000	879740000	869990000	866390000	839410000	734920000	789350000	825740000	648350000
P39158	Cold shock protein CspC	cspC	89.928	51.5	1083300000	2389700000	1216300000	802930000	604960000	887750000	818680000	749430000	796140000	484940000	865280000	1541500000
P39209	Methyl-accepting chemotaxis protein TlpC	tlpC	126.22	12.4	248610000	440110000	0	175780000	254510000	237490000	222250000	0	187580000	151380000	196960000	113120000
P39214	Methyl-accepting chemotaxis protein McpA	mcpA	257.62	38.9	2798100000	3754800000	2648500000	1943700000	1839300000	1899200000	2318100000	2228200000	1878500000	2143000000	1692800000	1981800000
P39215	Methyl-accepting chemotaxis protein McpB	mcpB	323.31	45	4711000000	7296700000	5036700000	3403800000	3361100000	3309700000	3487600000	3355300000	3175000000	3220800000	2710600000	2841300000
P39216	Methyl-accepting chemotaxis protein TlpA	tlpA	91.254	28.7	1530200000	2742300000	1394500000	1049900000	1491000000	1392200000	1388500000	1694100000	1627600000	1043500000	999390000	824940000
P39217	Methyl-accepting chemotaxis protein TlpB	tlpB	25.206	11.8	261970000	0	204960000	0	0	0	0	0	0	0	0	0
P39456	L-cystine import ATP-binding protein TcyC	tcyC	80.271	43.3	0	1117900000	0	0	0	0	0	0	0	0	0	0
P39574	Galactokinase	galK	112.27	41.3	1457300000	1368300000	810750000	952160000	903730000	1069200000	1097200000	1058500000	1175100000	1327700000	1078200000	1340500000
P39575	Galactose-1-phosphate uridylyltransferase	galT	72.584	37.4	703870000	586770000	0	510600000	584290000	649290000	721960000	750510000	607220000	328830000	0	820160000
P39576	Branched-chain-amino-acid aminotransferase 2	ilvK	234.62	54.8	10195000000	9330500000	9746400000	6570500000	5805200000	6247600000	6854700000	5284000000	5970100000	8617400000	7127300000	6585200000
P39578	Protein DltD	dltD	159.83	40.1	1626300000	3835600000	2820400000	1220700000	989560000	1075700000	1234900000	1162800000	970060000	1188100000	1521800000	1100700000
P39580	Protein DltB	dltB	2.2933	4.3	7573500	0	0	0	0	0	0	0	0	0	0	0
P39581	D-alanine--poly(phosphoribitol) ligase subunit 1	dltA	323.31	40.6	10519000000	8091100000	11573000000	5244800000	4816800000	4836900000	5756900000	4166400000	5060600000	4809200000	3852900000	5194000000
P39582	1,4-dihydroxy-2-naphthoate octaprenyltransferase	menA	20.62	15.1	0	431630000	0	0	0	0	0	0	0	0	0	0
P39583	GTP pyrophosphokinase YwaC	ywaC	2.9357	4.3	0	0	0	0	0	0	89550000	0	0	0	0	0
P39586	Uncharacterized protein YwbC	ywbC	54.161	34.1	836630000	0	0	1845700000	1521900000	1710000000	1419100000	1614900000	1232700000	1181200000	1198000000	1539600000
P39587	Putative ribosomal RNA large subunit methyltransferase YwbD	ywbD	22.925	24.5	754870000	703810000	947450000	0	0	0	0	565410000	625950000	993860000	708820000	0
P39593	Hydroxyethylthiazole kinase	thiM	42.811	25	215690000	0	227690000	0	0	0	226450000	200260000	0	0	0	0
P39594	Thiamine-phosphate synthase	thiE	90.865	48.6	519670000	1101900000	735110000	1007800000	1047100000	1432000000	1021400000	931540000	926800000	1092400000	891510000	1032400000
P39595	Ferrous iron permease EfeU	efeU	10.196	5.4	0	65261000	0	0	0	0	0	0	0	0	0	0
P39596	Probable iron uptake system component EfeM	efeM	107.32	53	1119700000	2016600000	1629600000	1449700000	1536600000	1497500000	1665800000	1605800000	1617000000	1395100000	1467400000	1407800000
P39597	Probable deferrochelatase/peroxidase EfeN	efeN	51.258	24.5	161050000	320860000	193180000	0	0	0	0	139900000	0	146720000	175100000	259430000
P39598	Uncharacterized protein YwbO	ywbO	3.1328	12.5	0	0	9930300	0	0	0	0	0	0	0	0	0
P39604	Rod shape-determining protein RodA	rodA	5.831	5.3	0	0	0	0	0	0	0	84044000	0	0	0	0
P39605	FMN reductase (NADPH)	nfrA1	111.03	45	962940000	1064500000	860060000	568490000	773040000	791520000	671110000	677650000	641770000	590230000	596670000	835080000
P39606	Uncharacterized protein YwcH	ywcH	5.2786	21	201980000	0	0	0	0	0	0	0	0	0	0	0
P39610	Pyridoxine kinase	pdxK	92.037	43.9	3551600000	5550700000	3639700000	1522400000	1619100000	1853800000	2114800000	1854300000	2114100000	3199100000	3579900000	2831500000
P39614	Uncharacterized glycosyltransferase YwdF	ywdF	16.24	35.8	0	0	234690000	390470000	349410000	299740000	329840000	330110000	0	0	0	360260000
P39615	Uracil-DNA glycosylase	ung	6.1283	19.1	46358000	0	0	0	0	0	0	0	0	0	0	0
P39616	Probable aldehyde dehydrogenase YwdH	ywdH	1.924	6.1	0	0	0	0	0	0	0	0	0	0	0	18288000
P39617	Uncharacterized protein YwdI	ywdI	51.122	25.7	148150000	212600000	106340000	0	0	0	0	103070000	0	0	0	0
P39632	Uncharacterized protein YweA	yweA	87.286	9.7	15346000000	7153800000	9024700000	15603000000	15670000000	14556000000	9874900000	10361000000	10178000000	6669700000	5736900000	4313100000
P39633	Catabolic NAD-specific glutamate dehydrogenase RocG	rocG	46.937	38.2	268190000	465740000	193390000	369250000	285620000	300060000	368100000	416800000	321440000	0	0	0
P39634	1-pyrroline-5-carboxylate dehydrogenase	rocA	323.31	63.3	7420700000	6224400000	7653300000	21188000000	23239000000	23245000000	30102000000	30075000000	33056000000	26627000000	27776000000	24388000000
P39635	Protein RocB	rocB	48.128	15.5	0	0	0	0	0	0	0	300760000	0	0	0	0
P39636	Amino-acid permease RocC	rocC	4.1746	5.3	0	0	33467000	0	0	0	0	0	0	0	0	0
P39639	Bacilysin biosynthesis protein BacB	bacB	167.62	64.3	2144800000	1878800000	1523200000	2882100000	4692000000	4213100000	3132200000	2754500000	3071100000	1701200000	1625000000	2340400000
P39640	Bacilysin biosynthesis oxidoreductase BacC	bacC	20.949	16.2	0	91546000	0	0	0	0	0	0	0	0	0	0
P39641	Alanine-anticapsin ligase BacD	bacD	273.04	36.7	4349900000	5429800000	4116900000	3808900000	4331400000	4495500000	4943800000	4366200000	3857900000	4915500000	4475200000	3984100000
P39642	Putative bacilysin exporter BacE	bacE	1.9866	3	0	88020000	0	0	0	0	0	0	0	0	0	0
P39643	Probable aspartate aminotransferase	ywfG	52.282	22.1	147740000	0	135260000	0	0	0	139580000	0	151270000	172470000	0	177410000
P39644	Bacilysin biosynthesis oxidoreductase YwfH	ywfH	138.66	73.4	2009700000	5343100000	3001500000	2667500000	3001600000	3063100000	2171400000	1789400000	2080900000	2326300000	2139000000	1881500000
P39645	Putative heme-dependent peroxidase YwfI	ywfI	240.32	62.2	4693800000	7676100000	5264400000	14234000000	17259000000	17190000000	21338000000	21528000000	23032000000	21398000000	27108000000	20490000000
P39646	Phosphate acetyltransferase	pta	323.31	82.7	41574000000	38379000000	39090000000	58792000000	65463000000	60801000000	66454000000	68763000000	63388000000	69533000000	62374000000	58859000000
P39647	HTH-type transcriptional regulator CysL	cysL	1.7381	9	0	0	0	0	0	0	0	32346000	0	0	0	0
P39648	Octanoyl-[GcvH]:protein N-octanoyltransferase	lipL	15.424	12.1	0	1222500000	0	0	0	0	0	0	0	0	0	0
P39651	Uncharacterized protein YwfO	ywfO	37.464	24.5	325890000	412310000	519120000	265280000	247400000	262420000	283590000	306590000	353120000	328820000	350100000	299250000
P39666	Probable nicotinate-nucleotide pyrophosphorylase [carboxylating]	nadC	184.44	52.6	4327600000	4846000000	4607700000	5675200000	6150300000	6013800000	5740000000	5601200000	6223400000	7730200000	6941600000	4580100000
P39667	Transcription repressor NadR	nadR	98.78	37.2	1164200000	560890000	1391900000	716250000	626330000	619370000	688550000	599260000	641790000	711420000	0	671860000
P39738	Flagellar hook-associated protein 2	fliD	10.37	5.8	0	48021000	0	0	0	0	0	0	0	0	0	0
P39739	Flagellar protein FliS	fliS	5.2249	22.6	0	21586000	0	0	0	0	0	0	0	0	0	0
P39751	MreB-like protein	mbl	323.31	58	18892000000	25686000000	18663000000	12408000000	10595000000	10749000000	13318000000	13223000000	11757000000	13623000000	11537000000	12870000000
P39756	Protein FdhD homolog	fdhD	10.178	4.6	0	93978000	0	0	0	0	0	0	0	0	0	0
P39757	Cyclic pyranopterin monophosphate synthase	moaA	19.678	23.2	292150000	351640000	0	0	0	0	0	0	0	0	0	0
P39758	Putative transition state regulator Abh	abh	21.911	82.6	0	165080000	2815400000	2038600000	1502100000	1672900000	1892000000	0	1528500000	2801800000	1883200000	0
P39759	Putative gamma-glutamylcyclotransferase YkqA	ykqA	16.707	21.3	0	0	0	122560000	0	0	0	0	0	0	178490000	0
P39760	Ktr system potassium uptake protein C	ktrC	194.14	47.1	1365300000	4111200000	1831000000	1939900000	1577800000	2047200000	1838600000	1564300000	1862100000	2211700000	2159800000	1640800000
P39761	Adenine deaminase	adeC	35.04	13.7	189940000	466010000	0	0	0	0	299300000	318430000	0	182530000	170910000	231250000
P39762	Aminopeptidase AmpS	ampS	117.5	28	0	0	0	597580000	679290000	598730000	551220000	514700000	602660000	797500000	840350000	604410000
P39763	Protein MreBH	mreBH	101.26	36.1	1020400000	2395200000	724500000	0	0	0	0	0	0	0	0	375790000
P39764	Sporulation kinase C	kinC	39.791	14.5	942180000	809000000	881380000	0	0	0	0	0	0	0	0	0
P39765	Bifunctional protein PyrR;Pyrimidine operon regulatory protein;Uracil phosphoribosyltransferase	pyrR	103.68	42.5	1264100000	2131300000	1591100000	986340000	697450000	855780000	1095700000	869450000	914020000	1138200000	1239000000	1193100000
P39771	Phosphoribosylglycinamide formyltransferase 2	purT	163.32	35.7	2315300000	1939300000	1721500000	2050800000	1796100000	1805500000	1800100000	1738100000	1442000000	1639200000	1276200000	1767600000
P39772	Asparagine--tRNA ligase	asnS	258.05	61.2	20307000000	16428000000	23682000000	24604000000	23147000000	22097000000	19367000000	19693000000	22389000000	28904000000	23964000000	24720000000
P39773	2,3-bisphosphoglycerate-independent phosphoglycerate mutase	gpmI	323.31	73.4	27855000000	30606000000	25048000000	31035000000	26785000000	27078000000	30885000000	27679000000	26377000000	24972000000	26205000000	27802000000
P39776	Tyrosine recombinase XerC	xerC	1.9606	5.9	0	0	10156000	0	0	0	0	0	0	0	0	0
P39778	ATP-dependent protease ATPase subunit ClpY	clpY	323.31	71.9	12832000000	12680000000	12334000000	18788000000	20405000000	19891000000	22782000000	20680000000	20825000000	15824000000	18633000000	19666000000
P39779	GTP-sensing transcriptional pleiotropic repressor CodY	codY	323.31	67.6	27335000000	33214000000	26924000000	32506000000	31514000000	32466000000	37160000000	35653000000	35572000000	35594000000	35118000000	31043000000
P39787	DNA replication protein DnaD	dnaD	19.116	28.9	179320000	0	99301000	0	0	0	0	0	76830000	0	0	0
P39788	Endonuclease III	nth	27.541	23.7	0	0	0	0	0	0	0	0	0	157340000	153560000	0
P39789	Uncharacterized protein YpoC	ypoC	9.4025	13.4	0	0	347770000	0	113860000	0	199000000	0	139920000	146470000	0	232730000
P39793	Penicillin-binding protein 1A/1B;Penicillin-insensitive transglycosylase;Penicillin-sensitive transpeptidase	ponA	323.31	45.2	5447000000	6125700000	5157300000	4806200000	5098400000	5186100000	4704700000	4847900000	4656900000	4683400000	4389200000	4627500000
P39796	Trehalose operon transcriptional repressor	treR	3.2295	10.1	0	0	0	0	0	0	0	0	0	0	80870000	0
P39800	N-acetylmuramoyl-L-alanine amidase XlyA	xlyA	6.9049	12.5	0	0	0	0	0	0	0	0	0	128460000	0	0
P39802	Chemotaxis protein CheW	cheW	164.56	53.8	2175100000	2974300000	2971100000	2138000000	1944600000	2062300000	2491200000	2351400000	2227200000	1998900000	1687500000	2030900000
P39803	UPF0750 membrane protein YitT	yitT	3.8029	11.4	0	0	0	0	0	0	0	0	0	0	0	16244000
P39804	Intracellular proteinase inhibitor	ipi	3.0476	18.5	0	14256000	0	0	0	0	0	0	0	0	0	0
P39805	Transcription antiterminator LicT	licT	14.82	24.2	0	0	84574000	0	0	0	0	0	0	0	0	0
P39807	Uncharacterized protein YvyF	yvyF	20.909	37.4	359410000	0	340940000	350360000	375190000	413310000	346480000	278710000	366310000	0	0	365160000
P39808	Uncharacterized protein YvyG	yvyG	22.49	18.8	0	46230000	0	0	0	0	0	0	0	0	0	0
P39809	Negative regulator of flagellin synthesis	flgM	34.791	48.9	0	0	0	117180000	126970000	0	123710000	0	0	122360000	152820000	208480000
P39810	Flagellar hook-associated protein 1	flgK	36.354	21.9	0	396020000	0	0	0	0	0	0	0	0	0	0
P39812	Glutamate synthase [NADPH] large chain	gltA	323.31	38.6	7769900000	9729100000	8090700000	3578400000	3685700000	3991200000	3533200000	3778200000	3112500000	2883700000	2939800000	3341700000
P39814	DNA topoisomerase 1	topA	323.31	50.1	11671000000	10391000000	12448000000	10202000000	9650600000	9673600000	9590400000	8988800000	9048200000	8776500000	8264000000	8219800000
P39815	Methylenetetrahydrofolate--tRNA-(uracil-5-)-methyltransferase TrmFO	trmFO	177.41	41.6	2617100000	1517200000	3514500000	3170400000	3889100000	4009600000	2841900000	2425200000	3423100000	3575100000	2951200000	2351400000
P39816	Putative PTS system glucosamine-specific EIICBA component;Glucosamine permease IIC component;Glucosamine-specific phosphotransferase enzyme IIB component;Glucosamine-specific phosphotransferase enzyme IIA component	gamP	79.944	12	352230000	413610000	291420000	273660000	268370000	263630000	215280000	298160000	256540000	253380000	284360000	188700000
P39820	Glutamate 5-kinase 1	proB	18.149	10.1	334900000	255570000	300400000	155670000	137270000	142390000	155080000	120420000	141970000	153640000	0	136940000
P39821	Gamma-glutamyl phosphate reductase	proA	97.539	39.5	2387800000	3324100000	2981400000	2035100000	2372000000	2603700000	2480400000	2222400000	2608000000	2774400000	2448700000	2662300000
P39822	Phosphatidylserine decarboxylase proenzyme;Phosphatidylserine decarboxylase alpha chain;Phosphatidylserine decarboxylase beta chain	psd	62.401	25.1	308010000	280750000	0	0	137120000	0	117800000	111720000	0	0	0	0
P39824	Beta-lactamase	penP	323.31	81	5293600000	5348800000	5681800000	7350100000	6339500000	5019000000	3465600000	4864100000	3332900000	6702200000	5870600000	7061700000
P39839	Uncharacterized peptidase YuxL	yuxL	49.758	14.8	0	0	0	628910000	932780000	794560000	677370000	862860000	877690000	0	0	661560000
P39840	Aldose 1-epimerase	galM	154.21	64.3	355810000	295740000	789610000	5590800000	6244500000	5515000000	5626900000	5208400000	5973900000	5034000000	5134000000	4375000000
P39841	Putative mannose-6-phosphate isomerase YvyI	yvyI	43.409	39.6	1371800000	624050000	954220000	1238700000	1262600000	1202100000	878640000	903110000	822600000	827520000	0	895180000
P39844	D-alanyl-D-alanine carboxypeptidase DacC	dacC	110.02	25.9	0	0	0	766170000	790480000	658630000	656750000	787990000	638470000	602600000	435440000	566760000
P39845	Plipastatin synthase subunit A;ATP-dependent glutamate adenylase 1;ATP-dependent ornithine adenylase	ppsA	296.15	33.8	2790700000	4420900000	3831300000	3721800000	3567300000	3668700000	4628100000	4418000000	4289200000	3563400000	3119900000	3575800000
P39846	Plipastatin synthase subunit B;ATP-dependent tyrosine adenylase 1;ATP-dependent threonine adenylase	ppsB	323.31	26.8	3409300000	4645700000	3604100000	3418000000	3332400000	3426400000	4822900000	4282400000	4246300000	3549500000	3382400000	3577400000
P39847	Plipastatin synthase subunit C;ATP-dependent glutamate adenylase 2;ATP-dependent alanine/valine adenylase	ppsC	323.31	34.4	3193300000	5438600000	3892800000	4411000000	4310400000	4364300000	5656600000	5906100000	5740200000	4940400000	4053000000	4453900000
P39848	Beta-N-acetylglucosaminidase	lytD	33.301	8.6	0	0	0	0	0	0	0	88850000	0	0	0	0
P39911	Uncharacterized protein YphF	yphF	23.467	18.9	0	0	0	0	63985000	0	0	0	0	0	0	0
P39912	Protein AroA(G);Phospho-2-dehydro-3-deoxyheptonate aldolase;Chorismate mutase	aroA	257.74	70.9	10341000000	11137000000	15667000000	14401000000	18080000000	17664000000	17228000000	18549000000	18394000000	16579000000	14033000000	14361000000
P39914	Uncharacterized protein YtxJ	ytxJ	132.12	65.7	1903700000	0	3299600000	3691800000	5065500000	5554900000	3002000000	2607500000	3344900000	3424900000	4275600000	2763700000
P40398	Uncharacterized oxidoreductase YhxD	yhxD	22.848	32.1	135390000	0	0	0	175080000	165030000	0	135820000	0	0	0	0
P40399	Phosphoserine phosphatase RsbU	rsbU	19.327	24.8	668780000	841940000	756330000	344570000	317510000	354780000	350150000	464380000	380820000	294450000	0	420210000
P40403	CheY-P phosphatase CheC	cheC	6.3102	4.8	0	0	206730000	0	0	0	0	0	0	0	0	0
P40408	HTH-type transcriptional activator Btr	btr	5.5342	5.1	0	0	0	0	0	0	0	0	0	3677000	0	0
P40409	Iron-uptake system-binding protein	feuA	305.7	64.7	15570000000	14982000000	18056000000	23776000000	25220000000	24344000000	27002000000	23893000000	25305000000	19595000000	21075000000	21181000000
P40737	Antitoxin YxxD	yxxD	21.099	35.4	0	0	1402500000	1752000000	1250900000	0	0	0	1088500000	804180000	913440000	1745100000
P40739	PTS system beta-glucoside-specific EIIBCA component;Beta-glucoside-specific phosphotransferase enzyme IIB component;Beta-glucoside permease IIC component;Beta-glucoside-specific phosphotransferase enzyme IIA component	bglP	1.687	1.5	160260000	447250000	87427000	0	19526000	0	0	0	0	0	0	111330000
P40740	Aryl-phospho-beta-D-glucosidase BglH	bglH	74.117	24.3	950180000	564780000	1269800000	2103500000	2412900000	2077500000	1899500000	1599600000	2151900000	1750400000	1912900000	1251400000
P40750	Penicillin-binding protein 4	pbpD	132.73	34.9	874530000	1950800000	484040000	885030000	593880000	0	624090000	616450000	0	879180000	589350000	708940000
P40758	Sensor histidine kinase GlnK	glnK	11.786	3.4	0	0	43155000	27507000	22585000	27309000	0	0	0	19908000	0	0
P40759	Transcriptional regulatory protein GlnL	glnL	3.1754	3.2	0	0	49419000	0	0	0	0	0	0	0	0	0
P40761	Uncharacterized protein YuxK	yuxK	13.472	24.1	0	0	0	63204000	0	0	0	0	0	0	0	0
P40762	Uncharacterized HTH-type transcriptional regulator YvmB	yvmB	323.31	78.7	15097000000	11897000000	13756000000	30442000000	29326000000	27841000000	31774000000	27919000000	26150000000	28682000000	29182000000	30078000000
P40767	Peptidoglycan DL-endopeptidase CwlO	cwlO	323.31	38.3	929660000	586040000	622400000	1746100000	1712000000	1520400000	1981800000	2133100000	1945100000	1966200000	2738400000	2088800000
P40768	Uncharacterized protein YtkA	ytkA	106.59	56.6	3512400000	3127300000	2117700000	6132100000	11244000000	10071000000	8418500000	11442000000	10148000000	6176200000	6828200000	7727700000
P40769	Uncharacterized metalloprotease YhfN	yhfN	1.8083	4.2	0	0	0	0	0	0	0	17275000	0	0	0	0
P40775	Uncharacterized protein YdjM	ydjM	48.288	46.3	2151200000	2741500000	1881900000	1958200000	1757700000	2028100000	2075200000	2167100000	1689800000	2369600000	2359000000	2133200000
P40778	UDP-N-acetylmuramate--L-alanine ligase	murC	187.15	48.4	7790800000	7860200000	7034100000	4534300000	3470500000	3714100000	4519800000	4122000000	3830900000	4500700000	4388500000	5680100000
P40779	UPF0478 protein YtxG	ytxG	271.92	57.9	7043000000	10571000000	6672000000	8555400000	9776400000	9030800000	8503700000	9930600000	9325500000	6593400000	8030800000	9764400000
P40780	Uncharacterized protein YtxH	ytxH	323.31	66.9	11528000000	14945000000	10467000000	16441000000	18809000000	16450000000	19255000000	21773000000	18247000000	13456000000	12309000000	17485000000
P40802	Putative polyketide biosynthesis enoyl-CoA isomerase PksI	pksI	19.81	26.1	0	0	284740000	162650000	214480000	0	260540000	200230000	230660000	243630000	152850000	212490000
P40805	Probable polyketide biosynthesis enoyl-CoA hydratase PksH	pksH	2.7471	15.1	0	0	0	0	0	28664000	0	0	0	0	0	0
P40806	Polyketide synthase PksJ	pksJ	323.31	30.9	4731700000	6680600000	5684200000	5571300000	6036100000	5637900000	7359500000	7088500000	7041700000	6389400000	5987600000	6700800000
P40830	Polyketide biosynthesis 3-hydroxy-3-methylglutaryl-ACP synthase PksG	pksG	61.498	22.6	0	0	285050000	438870000	711140000	551740000	575110000	719820000	723200000	524170000	666810000	616210000
P40871	2,3-dihydroxybenzoate-AMP ligase	dhbE	323.31	68.8	21877000000	37014000000	28737000000	23595000000	28076000000	27141000000	27779000000	24098000000	28985000000	32566000000	30576000000	30392000000
P40872	Polyketide synthase PksM	pksM	323.31	25.8	2098500000	3854500000	2591000000	1923600000	2305600000	2349600000	3042300000	3131100000	3063400000	2767200000	2343000000	3021600000
P40924	Phosphoglycerate kinase	pgk	323.31	85	121820000000	117910000000	106190000000	78136000000	75612000000	76740000000	83431000000	71517000000	80194000000	95100000000	84924000000	87441000000
P40949	Uncharacterized protein YqxM	yqxM	119.01	45.8	3543400000	1525200000	2399200000	3214600000	2810500000	2961400000	2593800000	2428700000	2024400000	1936800000	1838000000	1951300000
P42060	50S ribosomal protein L22	rplV	226.59	77	17581000000	14259000000	18954000000	21023000000	22636000000	22548000000	21657000000	21889000000	22491000000	30733000000	27485000000	24182000000
P42061	Oligopeptide-binding protein AppA	appA	323.31	56.2	15000000000	20123000000	16469000000	14552000000	14549000000	14692000000	9400500000	8694100000	9383800000	7524000000	7215500000	6903000000
P42062	Oligopeptide transport system permease protein AppB	appB	61.448	23.7	666990000	598140000	803330000	607580000	513400000	586060000	427800000	334590000	407420000	301620000	363160000	406070000
P42063	Oligopeptide transport system permease protein AppC	appC	14.406	4	0	0	502150000	0	0	0	0	0	0	0	0	0
P42064	Oligopeptide transport ATP-binding protein AppD	appD	12.172	6.4	125670000	0	148550000	0	0	190880000	0	0	0	0	0	0
P42065	Oligopeptide transport ATP-binding protein AppF	appF	3.1504	21.9	91486000	0	0	0	0	0	0	0	0	0	0	0
P42068	Formimidoylglutamase	hutG	7.5465	4.1	0	0	0	0	0	0	17457000	0	0	0	0	0
P42084	Imidazolonepropionase	hutI	7.3847	9	0	0	0	0	94701000	0	0	0	0	0	0	0
P42085	Xanthine phosphoribosyltransferase	xpt	112.61	74.7	11624000000	6649500000	10073000000	4900800000	5020200000	4273600000	3576000000	3957100000	4595300000	6176700000	4466100000	5220100000
P42086	Xanthine permease	pbuX	2.6471	2.7	0	118780000	0	0	0	0	0	0	0	0	0	0
P42095	DNA repair protein RecO	recO	5.8547	10.2	0	0	27719000	0	0	0	0	0	0	0	0	0
P42100	Glycerate kinase	glxK	12.227	17.8	226590000	0	0	0	0	0	0	0	0	0	0	0
P42103	Uncharacterized HTH-type transcriptional regulator YxaD	yxaD	3.2965	13.3	0	0	25664000	0	0	0	0	0	0	0	0	0
P42105	Uncharacterized HTH-type transcriptional regulator YxaF	yxaF	8.0522	26.7	0	0	0	0	186770000	0	0	0	198830000	0	0	0
P42108	Uncharacterized protein YxaI	yxaI	12.409	21.9	352290000	914960000	105730000	56828000	58414000	0	74403000	105020000	80851000	0	0	115170000
P42111	Uncharacterized protein YxaL	yxaL	11.217	17.6	0	0	0	0	0	0	0	0	0	152220000	0	0
P42113	Asparagine synthetase [glutamine-hydrolyzing] 2	asnH	12.082	7.8	0	0	0	205260000	423200000	359290000	0	0	0	0	0	0
P42182	GTPase Era	era	62.055	35.2	2891900000	3032400000	3194500000	1830800000	2181400000	2069800000	1786400000	1746300000	2082500000	2085000000	2029300000	1306600000
P42199	L-cystine-binding protein TcyA	tcyA	323.31	58.2	4943800000	7641400000	4623600000	4720000000	4362400000	4275900000	5117000000	4720000000	4992700000	5520900000	6013400000	4500000000
P42200	L-cystine transport system permease protein TcyB	tcyB	9.063	13.2	349610000	330290000	272090000	314130000	284370000	281750000	251970000	274730000	224440000	340790000	355300000	297450000
P42234	Catalase-2	katE	28.521	18.7	0	0	0	0	0	254520000	0	0	0	0	0	0
P42239	Uncharacterized HTH-type transcriptional regulator YcbG	ycbG	27.405	28.3	84236000	0	181520000	156280000	0	0	0	0	126130000	0	0	121070000
P42242	Uncharacterized protein YcbJ	ycbJ	63.711	52.6	443680000	945180000	607360000	373670000	431840000	463180000	354130000	428990000	549700000	0	325730000	378650000
P42246	Uncharacterized ABC transporter ATP-binding protein YcbN	ycbN	6.8923	8.8	0	0	0	0	0	0	0	123710000	0	0	0	0
P42251	Alkaline phosphatase D	phoD	99.903	30.7	3822400000	4833800000	3496400000	1034200000	894320000	997570000	0	0	0	0	0	0
P42294	Uncharacterized protein YxiB	yxiB	68.039	72.7	0	0	1468600000	1168800000	1109500000	1194700000	1256700000	854780000	1211700000	1164000000	1267000000	1180000000
P42295	Uncharacterized protein YxiC	yxiC	117.28	61.8	0	491460000	529380000	0	0	0	0	0	0	0	0	0
P42296	Ribonuclease YxiD	yxiD	99.16	32.2	631290000	774610000	530680000	240690000	202980000	308740000	427000000	0	0	236820000	170670000	544170000
P42297	Universal stress protein YxiE	yxiE	171.92	77.7	7125800000	11222000000	10084000000	10986000000	10771000000	11237000000	10968000000	10582000000	11580000000	10909000000	13615000000	10564000000
P42298	Uncharacterized protein YxiF	yxiF	12.78	16.7	478760000	595450000	0	0	0	0	0	411640000	0	0	0	0
P42305	ATP-dependent RNA helicase DbpA	dbpA	32.789	13.8	0	236220000	0	0	0	0	0	0	0	0	0	0
P42312	Purine nucleoside transport protein NupG	nupG	19.861	6.8	0	0	0	0	0	0	0	0	0	0	156770000	0
P42318	Uncharacterized protein YxjG	yxjG	323.31	51.3	2928400000	3008600000	2350700000	4053400000	4249000000	4260700000	3056500000	2973600000	3168400000	3069000000	2985600000	2356700000
P42319	Uncharacterized protein YxjH	yxjH	153.57	37.1	1681700000	3213700000	1494700000	2495800000	2314800000	2516100000	1985800000	1906600000	1964100000	1214900000	1521800000	1293000000
P42400	Probable ABC transporter extracellular-binding protein YckB	yckB	8.5862	42.2	261330000	356950000	220270000	219070000	194660000	219460000	201840000	237230000	204610000	212630000	187860000	276780000
P42405	3-hexulose-6-phosphate synthase	hxlA	50.414	33.3	0	0	0	309890000	403050000	404890000	594190000	464570000	526010000	563510000	557680000	420640000
P42409	RsbT co-antagonist protein RsbRA	rsbRA	33.133	19	1783200000	2609000000	1979900000	1300600000	1180200000	1239900000	1190800000	1136300000	982940000	937620000	1125500000	0
P42410	RsbT antagonist protein RsbS	rsbS	4.4851	8.3	0	0	509840000	0	0	0	0	0	0	0	0	0
P42411	Serine/threonine-protein kinase RsbT	rsbT	167.27	68.4	3496300000	3351000000	3513700000	2426300000	2249600000	2492900000	2323300000	2004400000	2225900000	2181500000	1814600000	1979000000
P42412	Methylmalonate semialdehyde dehydrogenase [acylating]	iolA	2.19	7.8	0	0	0	0	0	0	0	43571000	0	0	0	0
P42413	5-deoxy-glucuronate isomerase	iolB	12.983	8.9	0	0	0	0	0	0	0	63507000	0	0	20876000	0
P42416	Inosose dehydratase	iolE	2.6221	7.7	46203000	0	0	0	0	0	0	0	0	0	0	0
P42419	Inosose isomerase	iolI	10.428	11.2	0	72748000	0	0	0	0	0	0	0	0	0	0
P42420	6-phospho-5-dehydro-2-deoxy-D-gluconate aldolase	iolJ	3.922	5.2	0	0	0	0	0	0	11602000	0	0	0	0	0
P42433	Assimilatory nitrate reductase electron transfer subunit	nasB	2.835	0.9	0	0	0	0	0	0	0	0	0	0	0	0
P42435	Nitrite reductase [NAD(P)H]	nasD	323.31	46.5	9629100000	12401000000	10070000000	5585800000	5165600000	5696700000	10068000000	7126100000	8161400000	14588000000	10963000000	12312000000
P42436	Assimilatory nitrite reductase [NAD(P)H] small subunit	nasE	76.114	50	1222200000	1028700000	929000000	1620400000	1517800000	1465300000	3038900000	2604300000	2447300000	1435500000	1664600000	3940600000
P42437	Uroporphyrinogen-III C-methyltransferase	nasF	230.75	55.1	3222700000	2880600000	3986700000	3407100000	2546500000	2939200000	3532600000	2422800000	2965900000	3580100000	2905100000	3663100000
P42919	50S ribosomal protein L2	rplB	323.31	64.6	74896000000	64926000000	80646000000	88745000000	97514000000	98745000000	105130000000	103200000000	98688000000	86778000000	93715000000	102900000000
P42920	50S ribosomal protein L3	rplC	323.31	88	28492000000	35410000000	27270000000	31901000000	33616000000	31686000000	34811000000	33244000000	33317000000	40677000000	39120000000	37539000000
P42921	50S ribosomal protein L4	rplD	221.78	55.1	34780000000	67809000000	37416000000	47881000000	48775000000	49027000000	41516000000	39778000000	43036000000	50757000000	43111000000	48231000000
P42923	50S ribosomal protein L10	rplJ	285.63	99.4	47785000000	36131000000	43991000000	53610000000	52725000000	53398000000	53217000000	56290000000	53605000000	48223000000	49910000000	55222000000
P42924	50S ribosomal protein L23	rplW	178.57	84.2	33074000000	29319000000	35500000000	48695000000	46340000000	50403000000	51718000000	42354000000	44876000000	58035000000	54179000000	53649000000
P42953	Teichoic acid translocation permease protein TagG	tagG	12.786	8.7	102160000	0	0	0	0	0	0	0	0	138980000	0	0
P42954	Teichoic acids export ATP-binding protein TagH	tagH	52.862	19.7	844530000	909410000	466140000	240100000	0	0	274440000	375300000	277140000	277720000	191100000	315340000
P42955	Uncharacterized protein YslB	yslB	43.975	15.5	0	0	169330000	210320000	194420000	197430000	0	232730000	217200000	210710000	226490000	247670000
P42956	PTS system mannitol-specific EIICB component;Mannitol permease IIC component;Mannitol-specific phosphotransferase enzyme IIB component	mtlA	3.9972	2.5	0	0	0	0	0	0	0	0	0	0	0	2451700
P42957	Mannitol-1-phosphate 5-dehydrogenase	mtlD	8.6389	21.2	0	0	0	0	0	0	0	0	0	79839000	0	0
P42958	Probable tartrate dehydrogenase/decarboxylase	ycsA	123	22	414160000	342200000	391980000	347660000	341870000	365030000	399740000	398970000	340080000	376190000	392330000	436180000
P42959	Signal peptidase I U	sipU	3.6379	9.1	0	225520000	0	0	0	0	0	0	0	0	0	0
P42961	Uncharacterized protein YcsD	ycsD	6.1089	20	0	0	0	0	0	0	0	0	0	69821000	0	0
P42962	Putative phosphatase YcsE	ycsE	165.14	59	1582300000	1370900000	2409700000	1834100000	2057400000	2053700000	2052400000	1550600000	1917900000	1946200000	2213200000	1925600000
P42963	UPF0271 protein YcsF	ycsF	130.38	31.1	3194500000	2909400000	1940900000	1157100000	1528700000	1421300000	708010000	1075000000	894350000	0	0	632370000
P42964	Uncharacterized membrane protein YcsG	ycsG	9.2488	7.9	674540000	0	0	0	0	0	0	0	0	0	0	0
P42966	UPF0317 protein YcsI	ycsI	72.399	28.8	550150000	761080000	466950000	0	0	0	0	0	0	0	0	246470000
P42968	HTH-type transcriptional regulator KipR	kipR	10.751	17.6	0	0	0	63855000	74482000	0	0	0	0	0	0	0
P42971	Penicillin-binding protein 3	pbpC	315.23	43.7	4916300000	5547300000	4660200000	3735500000	4596100000	4197300000	4837100000	4541600000	4523600000	3807200000	4142700000	4248500000
P42972	Uncharacterized oxidoreductase YcsN	ycsN	98.918	37.7	1027300000	268980000	848810000	963920000	791170000	845040000	1040900000	1238200000	1263900000	692730000	663120000	793010000
P42973	Aryl-phospho-beta-D-glucosidase BglA	bglA	7.6144	9.8	0	0	0	196860000	0	0	320640000	263230000	0	339260000	321530000	231240000
P42974	NADH dehydrogenase	ahpF	197.33	39.9	5347800000	6947700000	4506700000	5343200000	5422300000	5767600000	7334600000	6618800000	6448600000	6994200000	6564700000	6362000000
P42976	4-hydroxy-tetrahydrodipicolinate reductase	dapB	184.7	47.2	3910000000	3548700000	5348700000	2964300000	3147800000	3537600000	2960200000	2835700000	3280000000	3673400000	3266800000	2538400000
P42979	Uncharacterized protein YpjD	ypjD	4.8622	9	0	144340000	0	0	0	0	0	0	0	0	0	0
P42980	Methylglyoxal synthase	mgsA	65.111	41.6	0	517480000	0	0	0	652570000	0	540390000	621020000	695490000	507840000	524140000
P42981	N-acetyl-alpha-D-glucosaminyl L-malate deacetylase 1	bshB1	3.0765	18.2	0	0	0	0	0	0	0	0	50266000	0	0	0
P42982	N-acetyl-alpha-D-glucosaminyl L-malate synthase	bshA	17.251	21.2	184130000	128440000	178740000	137750000	0	0	136760000	0	0	0	0	162150000
P45693	Stage V sporulation protein S	spoVS	158.2	82.6	8492300000	6311300000	8149700000	7489300000	7750700000	7699500000	7509000000	7396900000	7455200000	5289500000	5337800000	4989300000
P45694	Transketolase	tkt	323.31	63.6	77875000000	66467000000	64336000000	93654000000	92308000000	90636000000	117700000000	112020000000	110370000000	95613000000	101840000000	109370000000
P45708	UPF0154 protein YneF	yneF	38.08	43.1	3049900000	3192000000	3445900000	1799700000	2221600000	2347200000	2067700000	2014900000	1978100000	1458200000	1728800000	2380100000
P45709	Protein CcdB	ccdB	1.7554	6.7	95907000	0	0	0	0	0	0	0	0	0	0	0
P45710	Protein CcdC	ccdC	4.7194	8.1	0	0	96918000	0	0	0	0	0	0	0	0	0
P45740	Phosphomethylpyrimidine synthase	thiC	323.31	71.2	101320000000	108070000000	63309000000	60097000000	58436000000	56812000000	29065000000	35346000000	29359000000	29990000000	25948000000	29620000000
P45743	Isochorismatase	dhbB	323.31	63.5	14001000000	20829000000	23768000000	25693000000	29412000000	30380000000	30157000000	27319000000	31122000000	25744000000	21491000000	24103000000
P45744	Isochorismate synthase DhbC	dhbC	323.31	69.3	25021000000	43032000000	33896000000	31620000000	43092000000	42268000000	42051000000	44673000000	41764000000	37158000000	31542000000	40026000000
P45745	Dimodular nonribosomal peptide synthase	dhbF	323.31	47.5	30826000000	41595000000	44253000000	30843000000	37192000000	35405000000	35077000000	36220000000	37685000000	32023000000	28467000000	28832000000
P45858	2-methylcitrate synthase	mmgD	2.5206	6.2	625620000	1177100000	400070000	0	338260000	0	0	221300000	398910000	197060000	0	441610000
P45861	Uncharacterized ABC transporter ATP-binding protein YwjA	ywjA	98.377	28	1150000000	967240000	1051100000	503070000	619720000	547430000	604430000	596860000	470380000	415750000	442270000	523760000
P45862	Uncharacterized protein YwjB	ywjB	5.9868	17.8	0	0	0	0	348850000	300800000	0	0	0	0	0	0
P45866	Uncharacterized protein FadF	fadF	3.4744	3.1	169230000	0	0	0	0	0	0	0	0	0	0	0
P45868	Probable NAD-dependent malic enzyme 2	maeA	3.1496	9.8	90765000	0	0	0	0	0	0	0	0	0	0	0
P45871	Uncharacterized protein YwkD	ywkD	11.676	28.9	12864000	0	0	0	0	0	0	0	0	0	0	0
P45872	Peptide chain release factor 1	prfA	323.31	53.7	4677900000	5487600000	4148500000	2194500000	1898700000	2047400000	2485100000	2370500000	2242600000	2702300000	2416900000	3015900000
P45873	Release factor glutamine methyltransferase	prmC	10.731	15.3	0	80458000	0	0	0	0	0	0	0	0	0	0
P45874	Uncharacterized protein YwkF	ywkF	1.5481	11.6	0	4186000	0	0	0	0	0	0	0	0	0	0
P45913	Uncharacterized protein YqaP	yqaP	323.31	78	7986000000	11487000000	8048900000	11775000000	12246000000	11641000000	11459000000	11358000000	10012000000	9759500000	10743000000	10548000000
P45914	Uncharacterized protein YqaR	yqaR	4.128	13	0	0	122780000	0	0	0	0	0	0	0	0	0
P45919	Uncharacterized protein YqbC	yqbC	19.812	8.3	0	349180000	0	0	244140000	249040000	0	152070000	225680000	220520000	257950000	155000000
P45920	Uncharacterized protein YqbD	yqbD	1.918	2.2	0	0	0	0	0	0	0	0	0	0	0	16570000
P45941	Antitoxin YqcF	yqcF	85.407	39.6	5139700000	7770400000	2897500000	2677000000	3821500000	4066500000	2621300000	3053000000	3538900000	2434500000	2362500000	2914500000
P45942	Ribonuclease YqcG	yqcG	113.92	34.3	1604900000	2867900000	1704300000	843050000	812580000	807450000	1054400000	912620000	1021900000	1019400000	1025600000	851310000
P46208	Chaperone protein HtpG	htpG	323.31	55.1	6687400000	7745800000	8638100000	7423500000	7831500000	7846400000	7541100000	6476100000	7940400000	8016000000	7455100000	6402000000
P46318	Lichenan-specific phosphotransferase enzyme IIB component	licB	16.162	37.3	511450000	407320000	543410000	711110000	684300000	875420000	1352200000	1018900000	1181400000	0	0	1285200000
P46320	Probable 6-phospho-beta-glucosidase	licH	40.928	25.6	468220000	425180000	368220000	600530000	708510000	753770000	663580000	756880000	773590000	539500000	563770000	470200000
P46321	Probable licABCH operon regulator;Putative phosphotransferase enzyme IIB component;Putative phosphotransferase enzyme IIA component	licR	7.0545	8.1	166370000	304750000	0	266460000	190390000	0	225120000	0	234960000	194780000	197970000	247570000
P46322	CDP-diacylglycerol--glycerol-3-phosphate 3-phosphatidyltransferase	pgsA	14.62	18.1	310080000	0	0	502350000	521500000	0	436850000	372700000	389420000	503090000	0	633070000
P46323	Putative competence-damage inducible protein	cinA	143.53	38.2	1501400000	1749100000	2268700000	1286700000	1206500000	1292500000	1410500000	1219200000	1172200000	1459700000	2116400000	1277700000
P46324	Uncharacterized ABC transporter permease YvrN	yvrN	3.571	2.4	0	263340000	0	0	0	0	0	0	0	0	0	0
P46325	Uncharacterized protein YxbA	yxbA	17.108	30.3	469610000	480650000	0	0	174510000	0	0	0	0	0	0	0
P46326	Uncharacterized protein YxbB	yxbB	53.768	16	0	0	584860000	577350000	849830000	897750000	0	430020000	433220000	0	292290000	0
P46327	Uncharacterized protein YxbC	yxbC	113.8	44.8	4012900000	2932900000	2688500000	6410200000	8989700000	6361800000	4126600000	5654200000	3964700000	1783600000	2514800000	2495400000
P46328	Uncharacterized protein YxbD	yxbD	15.141	21.4	693880000	607870000	801480000	636670000	643470000	818970000	488480000	555850000	429270000	429870000	406880000	491330000
P46336	Protein IolS	iolS	323.31	69	6991100000	5891700000	6867500000	8030600000	8614700000	7982700000	9978300000	9314500000	8964900000	10503000000	9119300000	8193800000
P46337	HTH-type transcriptional regulator IolR	iolR	20.409	31.5	422660000	0	0	0	273350000	277000000	249610000	327270000	239110000	356670000	319100000	291630000
P46338	Phosphate-binding protein PstS	pstS	323.31	57.7	47885000000	61980000000	44179000000	13086000000	8863800000	8600800000	828220000	3129400000	1071600000	0	0	455580000
P46339	Probable ABC transporter permease protein YqgH	yqgH	91.8	8.4	3809800000	5492000000	4371800000	0	0	0	0	0	0	0	0	0
P46340	Probable ABC transporter permease protein YqgI	yqgI	10.772	19	47540000	0	0	0	0	0	0	0	0	0	0	0
P46341	Phosphate import ATP-binding protein PstB 2	pstB2	196.58	56.1	3726800000	2633200000	7106500000	0	0	0	0	0	0	0	0	0
P46342	Phosphate import ATP-binding protein PstB 1	pstB1	103.1	48.8	1969400000	3358500000	1986600000	0	0	0	0	0	0	0	0	0
P46343	PhoH-like protein	phoH	76.389	42.3	646390000	622780000	881600000	600690000	596580000	639130000	785930000	419760000	744190000	698010000	670730000	701000000
P46344	Uncharacterized protein YqfF	yqfF	24.818	11.5	0	0	0	0	0	0	179920000	0	0	213260000	193710000	0
P46347	Endoribonuclease YbeY	ybeY	19.888	14.6	0	0	0	0	0	0	0	0	0	87958000	0	0
P46352	Tyrosine recombinase XerD	xerD	20.472	16.2	0	0	70531000	0	0	0	0	0	0	42293000	0	0
P46353	Phosphopentomutase	drm	323.31	45.4	4358500000	3892300000	4023300000	11020000000	11319000000	11151000000	10370000000	10340000000	9311200000	10610000000	9625700000	8743900000
P46354	Purine nucleoside phosphorylase 1	punA	314.04	60.1	6483000000	6987800000	5992300000	9709300000	9466800000	10279000000	8475500000	8820200000	9867700000	6477100000	6401100000	6028500000
P46898	50S ribosomal protein L6	rplF	323.31	88.3	29662000000	22963000000	40233000000	36761000000	39521000000	38237000000	37052000000	39589000000	40949000000	36760000000	37429000000	46982000000
P46899	50S ribosomal protein L18	rplR	248.48	80	10416000000	12121000000	11500000000	6841100000	7580500000	7946100000	8293100000	11231000000	10241000000	9046400000	8098400000	9169400000
P46905	Uncharacterized oxidoreductase YccK	yccK	26.387	27.1	240790000	0	299520000	407530000	389390000	395160000	488740000	448040000	464030000	307200000	0	417870000
P46906	Arginine--tRNA ligase	argS	323.31	64.7	4188800000	5190600000	4806400000	7839600000	10182000000	9675900000	9233700000	8241600000	9910900000	10578000000	9965100000	6446400000
P46911	Menaquinol-cytochrome c reductase iron-sulfur subunit	qcrA	64.49	65.9	814190000	1143600000	769690000	2122400000	2072600000	2382100000	2400600000	2196300000	2292700000	1558400000	1947200000	2047800000
P46912	Menaquinol-cytochrome c reductase cytochrome b subunit	qcrB	47.05	21.9	1211300000	1008800000	1053000000	1555200000	1556900000	1425400000	1516000000	1347600000	1453700000	0	815320000	1212400000
P46913	Menaquinol-cytochrome c reductase cytochrome b/c subunit	qcrC	16.758	22	329790000	363140000	0	431830000	533520000	587000000	391930000	478250000	492370000	293090000	294670000	282510000
P46917	Minor teichoic acid biosynthesis protein GgaA	ggaA	5.1685	10.5	0	0	0	0	0	0	0	0	0	0	254260000	0
P46918	Minor teichoic acid biosynthesis protein GgaB	ggaB	99.102	23.6	377460000	712060000	0	0	460590000	0	0	280860000	354870000	276360000	0	369920000
P46919	Glycerol-3-phosphate dehydrogenase [NAD(P)+]	gpsA	240.41	62.9	3041200000	4605200000	3504800000	2519000000	2797400000	2608200000	2713600000	2684300000	2669200000	3218200000	3697900000	2903100000
P46920	Glycine betaine transport ATP-binding protein OpuAA	opuAA	181.02	41.9	2421900000	2721600000	2811800000	2451400000	2401900000	2105100000	2715300000	2789800000	2649900000	3356500000	2376400000	2574200000
P46921	Glycine betaine transport system permease protein OpuAB	opuAB	37.645	13.5	877670000	1534500000	858920000	722780000	593050000	684870000	785270000	926410000	810630000	701860000	724490000	1018500000
P46922	Glycine betaine-binding protein OpuAC	opuAC	94.012	31.1	940410000	1242000000	1058800000	1067600000	1082900000	1179800000	1068300000	1149700000	1293100000	776200000	921700000	1143400000
P49778	Elongation factor P	efp	60.797	42.7	14412000000	12231000000	11263000000	9026700000	10851000000	10733000000	12723000000	9134900000	9660700000	12699000000	13724000000	14993000000
P49785	Stage III sporulation protein AH	spoIIIAH	9.7921	9.2	0	0	0	21331000	17176000	20782000	0	0	0	0	0	0
P49787	Biotin carboxylase 1	accC1	323.31	55.6	10727000000	15272000000	10678000000	5000900000	5931000000	5678100000	7075600000	7107500000	6722200000	7071500000	6043600000	8068500000
P49814	Malate dehydrogenase	mdh	323.31	63.5	50999000000	45745000000	51636000000	100880000000	112290000000	105830000000	97280000000	96755000000	94989000000	88965000000	91217000000	80057000000
P49849	DNA mismatch repair protein MutS	mutS	55.389	14.3	632940000	881490000	286840000	298050000	0	281010000	319510000	275420000	276840000	284420000	420030000	368050000
P49850	DNA mismatch repair protein MutL	mutL	29.292	9.4	0	365140000	0	0	0	0	0	0	0	0	0	0
P49851	Uncharacterized acyl-CoA thioester hydrolase YkhA	ykhA	26.309	45.9	468520000	262390000	473410000	0	0	0	0	0	0	0	0	0
P49852	Flavohemoprotein	hmp	71.337	28.8	397140000	509110000	0	628540000	555900000	659300000	436680000	459460000	593780000	485410000	408600000	383870000
P49938	Iron(3+)-hydroxamate import ATP-binding protein FhuC	fhuC	9.6749	22.7	0	0	0	0	0	0	0	0	0	0	34232000	0
P50619	Uncharacterized protein YmaB	ymaB	5.2352	10.7	0	0	0	0	0	0	0	25595000	0	0	0	0
P50620	Ribonucleoside-diphosphate reductase subunit alpha	nrdE	323.31	46.1	9329600000	10188000000	8165500000	5806200000	5135400000	5354200000	6433200000	5737700000	5944200000	6358800000	6570800000	6151700000
P50621	Ribonucleoside-diphosphate reductase subunit beta	nrdF	46.169	29.5	355180000	313010000	498190000	387120000	427270000	491850000	416040000	490860000	488480000	545520000	461020000	480850000
P50727	Ferredoxin	fer	11.444	48.8	0	0	0	791850000	0	463630000	0	0	0	0	0	578550000
P50729	Probable ATP-dependent DNA helicase RecS	recS	10.347	9.5	0	72634000	0	0	0	0	0	0	0	0	0	0
P50733	Uncharacterized protein YpbG	ypbG	5.0853	12	0	15877000	0	0	0	0	0	0	0	0	0	0
P50735	Cryptic catabolic NAD-specific glutamate dehydrogenase GudB	gudB	323.31	61.8	37904000000	59088000000	39613000000	28036000000	29435000000	28082000000	29050000000	27197000000	29569000000	27674000000	32211000000	29961000000
P50736	Uncharacterized protein YpdA	ypdA	16.015	24.4	1009600000	823190000	744580000	752750000	580710000	541480000	685770000	683600000	0	649990000	610800000	838010000
P50740	Isopentenyl-diphosphate delta-isomerase	fni	4.3478	18.1	0	353830000	0	0	0	0	0	0	0	0	0	0
P50743	GTPase Der	der	235.03	44.7	6594400000	5757100000	9032500000	4208700000	3638400000	4165800000	3479500000	3416000000	4179800000	4287400000	4028400000	4001500000
P50829	Putative phosphotransferase enzyme IIA component YpqE	ypqE	113.19	60.7	2076000000	565480000	2480100000	2223400000	2442400000	2973900000	2526900000	2099600000	2708600000	2686000000	2793700000	2049300000
P50830	Uncharacterized ATP-dependent helicase YprA	yprA	53.546	13.5	194290000	180370000	208620000	129670000	0	0	161820000	118440000	0	0	0	0
P50831	Probable ATP-dependent helicase YpvA	ypvA	30.497	10.8	750220000	530550000	1116000000	497440000	454460000	0	431730000	0	488740000	487330000	396700000	501460000
P50833	Uncharacterized protein YppE	yppE	22.121	28.5	0	0	0	0	237620000	304100000	0	0	211510000	231400000	287130000	0
P50840	Putative RNA methyltransferase YpsC	ypsC	43.79	27.5	773720000	778980000	1080700000	775860000	696500000	691850000	763250000	691590000	770590000	903210000	787130000	779290000
P50842	2-dehydro-3-deoxy-D-gluconate 5-dehydrogenase	kduD	125.86	22.8	891850000	1641200000	1287300000	554910000	759270000	681940000	735210000	693260000	806040000	463560000	455120000	688220000
P50843	4-deoxy-L-threo-5-hexosulose-uronate ketol-isomerase	kduI	179.14	44.4	3965800000	4235500000	3598500000	6683600000	6626900000	6273200000	7356600000	7757500000	6452700000	4681400000	4344400000	5497200000
P50845	2-dehydro-3-deoxygluconokinase	kdgK	17.857	4.6	0	299780000	0	0	0	0	0	0	0	0	0	0
P50846	KHG/KDPG aldolase;4-hydroxy-2-oxoglutarate aldolase;2-dehydro-3-deoxy-phosphogluconate aldolase	kdgA	3.8063	9.7	0	0	0	0	0	0	0	0	0	0	28183000	0
P50848	Carboxypeptidase 1	ypwA	201.84	43.5	2424400000	610030000	2740400000	5978300000	5671700000	5994200000	6243700000	5547000000	5790400000	4768900000	5130400000	7194800000
P50849	Polyribonucleotide nucleotidyltransferase	pnp	323.31	70.8	35765000000	35526000000	32886000000	29730000000	30858000000	31223000000	29624000000	28173000000	27498000000	27916000000	23854000000	29678000000
P50863	Protein mrp homolog SalA	salA	323.31	60.2	7871300000	6140000000	7248400000	6679500000	5301100000	5558000000	6149900000	5755600000	5533400000	9597300000	9266000000	9500500000
P50866	ATP-dependent Clp protease ATP-binding subunit ClpX	clpX	323.31	63.1	38254000000	53616000000	37530000000	22226000000	19871000000	21516000000	23198000000	20889000000	22380000000	26952000000	23361000000	28149000000
P51777	Cold shock protein CspD	cspD	213.36	53	4060700000	0	5550300000	22863000000	17815000000	18072000000	24922000000	17020000000	16888000000	31950000000	37636000000	38756000000
P51785	Dihydroxy-acid dehydratase	ilvD	102.86	30.1	1188200000	1833100000	1388600000	858840000	934640000	984940000	491390000	552840000	545310000	497230000	573170000	378780000
P51831	3-oxoacyl-[acyl-carrier-protein] reductase FabG	fabG	323.31	71.1	3352600000	4950500000	5007100000	4785300000	5468000000	5200800000	5281700000	4447100000	5881900000	7405200000	5904200000	4786000000
P51833	Ribonuclease 3	rnc	145.72	41.4	3404100000	4354500000	3852600000	2500300000	3066100000	2974100000	3203900000	3294700000	3185000000	3187100000	3275200000	2617200000
P51834	Chromosome partition protein Smc	smc	246.79	25	1208200000	1410400000	1149000000	721900000	270400000	246280000	547900000	625420000	480810000	588230000	502710000	684170000
P51835	Signal recognition particle receptor FtsY	ftsY	238.67	54.1	5356000000	6231100000	4930600000	4105200000	2739600000	3013000000	4151800000	3930800000	3371900000	3992200000	3349100000	3784800000
P52035	Glutathione peroxidase homolog BsaA	bsaA	44.559	40.6	658240000	1621400000	384390000	454410000	412680000	412760000	490410000	562860000	476750000	656930000	677370000	586270000
P52996	3-methyl-2-oxobutanoate hydroxymethyltransferase	panB	113.16	44.4	414470000	371580000	514370000	552540000	0	0	650970000	649360000	0	579650000	641460000	970210000
P52998	Pantothenate synthetase	panC	83.289	33.9	4492800000	3842300000	3095300000	1681100000	1769000000	1800400000	2408400000	2958600000	1959600000	2407600000	2611400000	2204300000
P52999	Aspartate 1-decarboxylase;Aspartate 1-decarboxylase beta chain;Aspartate 1-decarboxylase alpha chain	panD	66.709	52.8	1439700000	1780400000	779180000	1531200000	1755700000	1671700000	1459900000	1407400000	1592600000	1517500000	1716600000	1408100000
P53001	Aspartate aminotransferase	aspB	323.31	75.6	42366000000	50213000000	47722000000	26626000000	25871000000	26879000000	32862000000	26841000000	32003000000	44033000000	40606000000	40391000000
P53554	Biotin biosynthesis cytochrome P450	bioI	229.96	40.8	1102900000	2484900000	1703400000	523100000	495500000	467600000	488390000	173860000	435450000	751190000	479070000	112880000
P53555	L-Lysine--8-amino-7-oxononanoate transaminase	bioK	263.08	45.8	16306000000	16596000000	16777000000	20222000000	22098000000	19397000000	16573000000	16372000000	17656000000	16868000000	16655000000	14246000000
P53556	8-amino-7-oxononanoate synthase 2	bioF	122.01	33.2	630450000	1659300000	1002700000	328950000	380500000	222800000	229870000	299740000	0	407030000	0	0
P53557	Biotin synthase	bioB	323.31	58.5	13399000000	17908000000	15690000000	8428700000	7686100000	8543000000	8783200000	7497900000	7228600000	7141600000	7130700000	8925600000
P53558	ATP-dependent dethiobiotin synthetase BioD	bioD	78.739	62.3	3156500000	2406400000	5153800000	3126600000	3680500000	3673600000	2294300000	2379300000	2880400000	3968300000	3176400000	2391100000
P53559	6-carboxyhexanoate--CoA ligase	bioW	245.82	55.6	7465600000	8472800000	7121700000	3550300000	2906800000	2897300000	3250300000	3110800000	3059700000	1762700000	1392300000	2829900000
P53560	Uncharacterized protein YtbQ	ytbQ	28.683	33.6	354630000	559310000	310830000	479830000	443590000	386600000	308840000	307890000	341600000	275420000	356660000	319920000
P54154	Peptide methionine sulfoxide reductase MsrA	msrA	78.197	50.8	731790000	0	891180000	1207100000	1176600000	1329800000	1156400000	816830000	859680000	1205100000	1256000000	1301200000
P54155	Peptide methionine sulfoxide reductase MsrB	msrB	38.592	38.5	0	0	308200000	311980000	0	346380000	336600000	0	325440000	380870000	0	361240000
P54156	Putative sigma L-dependent transcriptional regulator YplP	yplP	14.278	10.3	0	130420000	0	0	0	0	0	0	0	0	0	0
P54159	Uncharacterized protein YpbR	ypbR	220.43	27.3	1109000000	948270000	2474400000	237430000	239540000	210160000	252480000	224280000	225510000	295960000	240190000	259230000
P54161	5-3 exonuclease	ypcP	37.525	24.3	394590000	652220000	461200000	0	0	0	242960000	286310000	0	0	0	0
P54162	14.7 kDa ribonuclease H-like protein	rnhA	2.4452	18.9	0	0	0	88666000	85106000	0	0	69187000	82131000	0	0	0
P54167	Homoserine O-succinyltransferase	metA	41.67	33.9	913250000	944050000	1258800000	887340000	963550000	868210000	1114000000	1058800000	967130000	807370000	836490000	849600000
P54168	Uncharacterized protein YpgQ	ypgQ	22.845	31.2	0	0	0	0	0	0	119190000	109960000	0	0	0	0
P54169	Uncharacterized protein YpgR	ypgR	290.04	71.1	6217600000	11835000000	5121000000	2989600000	2340300000	2854300000	3015500000	4554700000	3312500000	3028000000	2987400000	4111300000
P54170	UPF0403 protein YphP	yphP	103.43	68.1	1840900000	3555400000	3731500000	1436600000	1279700000	1399900000	2151000000	1462800000	1800600000	2407200000	2511600000	2205800000
P54173	Uncharacterized protein YpjQ	ypjQ	95.512	49.2	1093300000	548490000	1542700000	1091800000	852130000	1144400000	1476600000	1159700000	909040000	845940000	1098800000	1070300000
P54178	SCO1 protein homolog	ypmQ	9.7456	27.5	0	0	0	0	0	0	0	170970000	336110000	0	0	232440000
P54179	Uncharacterized protein YpmS	ypmS	6.4915	17.6	0	0	0	0	0	0	415830000	407370000	0	0	0	0
P54182	Uncharacterized HTH-type transcriptional regulator YpoP	ypoP	29.533	41.1	0	0	0	941620000	931170000	846370000	907490000	845800000	998040000	1140600000	775190000	548230000
P54304	Oxygen-independent coproporphyrinogen-III oxidase-like protein YqeR	hemN	13.456	17.9	0	110790000	0	0	0	0	0	0	0	0	0	0
P54327	Phage-like element PBSX protein XkdG	xkdG	32.804	32.8	0	0	0	317710000	0	0	0	353570000	285120000	369940000	366630000	0
P54331	Phage-like element PBSX protein XkdK	xkdK	68.829	26.6	343340000	948980000	348920000	545730000	589140000	613780000	453000000	518470000	572000000	664840000	665780000	545970000
P54374	Shikimate dehydrogenase (NADP(+))	aroE	75.268	34.3	576630000	881800000	742270000	525740000	0	518460000	674900000	658010000	594510000	750600000	590600000	652620000
P54375	Superoxide dismutase [Mn]	sodA	323.31	69.3	47034000000	8081400000	33191000000	67901000000	63046000000	61082000000	57279000000	56706000000	57699000000	35648000000	50674000000	62323000000
P54376	Probable glycine dehydrogenase (decarboxylating) subunit 1	gcvPA	149.17	42.6	4056600000	2070700000	3724300000	2905700000	3159900000	3156500000	2889800000	2401000000	3345000000	2470400000	3102600000	2367000000
P54377	Probable glycine dehydrogenase (decarboxylating) subunit 2	gcvPB	323.31	49.4	7144200000	10284000000	8166000000	6534100000	6966500000	7515900000	7128200000	6038200000	6931300000	7163000000	6303400000	6388400000
P54378	Aminomethyltransferase	gcvT	323.31	70.7	19213000000	20396000000	17922000000	15533000000	17742000000	19201000000	14329000000	12331000000	15646000000	17053000000	19944000000	15714000000
P54380	Glycine--tRNA ligase alpha subunit	glyQ	98.576	36.9	5121500000	3681600000	7530300000	4141800000	4076100000	4806000000	4654100000	4451300000	5238500000	4772800000	4729700000	6157200000
P54381	Glycine--tRNA ligase beta subunit	glyS	323.31	46.4	7534500000	9202500000	11184000000	4897600000	5932100000	5601200000	5746900000	5479800000	6709400000	6429600000	6537200000	6892800000
P54382	Bifunctional protein FolD;Methylenetetrahydrofolate dehydrogenase;Methenyltetrahydrofolate cyclohydrolase	folD	211.05	75.3	15190000000	15111000000	15275000000	10564000000	8759900000	10464000000	13356000000	11892000000	9608700000	11350000000	10432000000	12884000000
P54383	Farnesyl diphosphate synthase	ispA	51.48	39.9	0	658510000	610790000	0	565190000	596510000	0	463160000	553370000	0	0	675730000
P54389	TPR repeat-containing protein YpiA	ypiA	93.056	17.7	462800000	787470000	922170000	0	240480000	0	0	346200000	436060000	511680000	453250000	0
P54390	UPF0302 protein YpiB	ypiB	21.963	41.9	954190000	826340000	962440000	0	382160000	0	0	0	405620000	0	0	361410000
P54391	Uncharacterized protein YpiF	ypiF	75.939	41.2	191050000	0	157560000	568780000	698030000	786030000	467420000	567500000	715110000	481840000	560040000	385690000
P54394	Probable ATP-dependent helicase DinG homolog	dinG	46.981	13	653000000	499090000	338880000	0	0	0	0	0	0	0	406590000	207210000
P54396	Uncharacterized protein YpmB	ypmB	12.329	23	0	0	0	0	0	0	0	0	0	35152000	0	0
P54418	Phosphoenolpyruvate carboxykinase [ATP]	pckA	323.31	46.3	2317900000	2478900000	2461400000	10995000000	14079000000	12527000000	8911100000	8386400000	8164600000	5330500000	5515600000	6070500000
P54419	S-adenosylmethionine synthase	metK	323.31	41	18065000000	12233000000	22526000000	13824000000	13228000000	14134000000	14793000000	11966000000	13284000000	13694000000	11943000000	13545000000
P54420	Asparagine synthetase [glutamine-hydrolyzing] 1	asnB	280.63	49.4	16588000000	23748000000	16635000000	11636000000	9401400000	9658600000	10974000000	10371000000	10125000000	12168000000	11061000000	12911000000
P54421	Probable peptidoglycan endopeptidase LytE	lytE	323.31	63.8	34602000000	39311000000	27609000000	16440000000	12425000000	13235000000	8361300000	9527500000	7574400000	9816500000	10310000000	11891000000
P54422	Gamma-glutamyltranspeptidase;Gamma-glutamyltranspeptidase large chain;Gamma-glutamyltranspeptidase small chain	ggt	7.8483	7.2	0	0	0	0	0	0	0	0	0	0	45135000	0
P54423	Cell wall-associated protease;Cell wall-associated polypeptide CWBP23;Cell wall-associated polypeptide CWBP52	wprA	323.31	57.4	82250000000	52243000000	61317000000	192720000000	168030000000	168740000000	168470000000	174160000000	161780000000	166560000000	166570000000	173400000000
P54425	Uncharacterized transporter YbxG	ybxG	6.9045	2.8	0	0	0	0	0	0	0	0	0	0	0	0
P54431	Uncharacterized protein YrkD	yrkD	29.934	50.8	0	0	0	0	0	194050000	0	0	208210000	0	0	0
P54439	Uncharacterized NAD(P)H oxidoreductase YrkL	yrkL	22.502	35.6	0	0	0	307080000	406690000	349090000	219840000	0	354370000	210520000	259390000	314220000
P54447	Uncharacterized protein YqeB	yqeB	3.8797	10.8	0	0	89124000	0	0	0	0	0	0	0	0	0
P54452	Uncharacterized protein YqeG	yqeG	13.596	32.6	255740000	0	505170000	0	492250000	505790000	374460000	0	0	592690000	535350000	412630000
P54453	Uncharacterized protein YqeH	yqeH	58.662	21	1527200000	1231200000	2083500000	1070000000	1020800000	1126300000	1257400000	1222800000	1117700000	1316400000	1136600000	972360000
P54454	Probable RNA-binding protein YqeI	yqeI	125.62	74	1400900000	0	1256900000	3347400000	3823600000	3742900000	2857700000	2423000000	2930000000	3209300000	4409000000	3085100000
P54456	Uncharacterized protein YqeK	yqeK	31.663	30.6	109430000	0	168160000	0	150320000	167720000	171210000	157840000	132920000	0	0	163720000
P54457	Ribosomal silencing factor RsfS	rsfS	38.514	25.4	1076600000	1234800000	929290000	741980000	842000000	953270000	702580000	756740000	828310000	877670000	0	531970000
P54458	Putative methyltransferase YqeM	yqeM	37.615	17	0	169610000	0	0	0	0	0	0	0	0	0	0
P54460	Ribosomal protein L11 methyltransferase	prmA	12.541	18.6	149930000	0	0	0	0	0	0	0	0	0	0	0
P54461	Ribosomal RNA small subunit methyltransferase E	rsmE	13.848	29.3	0	0	0	0	0	0	0	0	0	0	75567000	0
P54462	Threonylcarbamoyladenosine tRNA methylthiotransferase MtaB	mtaB	36.459	17.3	0	1069800000	524350000	0	0	0	0	0	0	0	0	0
P54464	Uncharacterized protein YqeY	yqeY	118.78	70.3	5446500000	4841800000	3257500000	4453300000	3457100000	3147800000	4594100000	4590400000	3449900000	3981500000	4162200000	5335300000
P54465	Uncharacterized protein YqeZ	yqeZ	28.735	4.3	0	127350000	0	0	0	0	0	0	0	0	0	0
P54466	UPF0365 protein YqfA	yqfA	323.31	69.5	41379000000	52014000000	44016000000	34894000000	36536000000	38437000000	35648000000	31897000000	33691000000	25152000000	22737000000	29205000000
P54467	Uncharacterized protein YqfB	yqfB	2.9367	9.4	0	6943500	0	0	0	0	0	0	0	0	0	0
P54470	Putative pyruvate, phosphate dikinase regulatory protein	yqfL	164.74	60.4	4488200000	6990600000	4764400000	2732700000	2578700000	2862500000	3182600000	3218400000	3061700000	2471000000	2157900000	2902500000
P54471	tRNA (adenine(22)-N(1))-methyltransferase	trmK	20.57	37	296670000	0	271270000	339020000	0	315390000	343310000	327240000	326250000	257400000	0	212630000
P54472	Putative GTP cyclohydrolase 1 type 2	yqfO	188.25	50.7	2718600000	3283700000	1446500000	2145900000	1990400000	2404100000	2326100000	3679300000	2369400000	1554300000	1590200000	1966600000
P54473	4-hydroxy-3-methylbut-2-enyl diphosphate reductase	ispH	87.975	34.7	1463900000	2551600000	926570000	584490000	643210000	417450000	955590000	807450000	580280000	843530000	813170000	981180000
P54475	DEAD-box ATP-dependent RNA helicase CshB	cshB	185.66	43.4	2832200000	2826800000	3348200000	1828700000	1883200000	1882500000	1718300000	1585900000	1978400000	1852800000	2191200000	2188500000
P54476	Probable endonuclease 4	nfo	51.291	32	525410000	750210000	394500000	375580000	599260000	532620000	471830000	654170000	560080000	477550000	630980000	372530000
P54479	Zinc-specific metallo-regulatory protein	zur	28.004	11	0	0	0	0	84482000	0	0	0	0	0	0	0
P54480	Putative nucleotidase YqfW	yqfW	2.3178	29.5	0	0	238710000	434800000	0	341310000	387900000	0	0	0	0	0
P54482	4-hydroxy-3-methylbut-2-en-1-yl diphosphate synthase (flavodoxin)	ispG	323.31	70	13041000000	16822000000	11026000000	7948900000	7300300000	8163700000	8467500000	8640300000	7657300000	7984500000	6810900000	8257100000
P54484	Cell wall-binding protein YqgA	yqgA	323.01	62.7	57003000000	33271000000	61977000000	144820000000	124170000000	152900000000	117020000000	92499000000	130340000000	141650000000	157840000000	146320000000
P54488	Uncharacterized protein YqgF	yqgF	66.421	19.8	798820000	1361300000	0	0	0	0	0	0	0	0	0	0
P54491	Uncharacterized protein YqgN	yqgN	44.375	34.8	0	0	417200000	591830000	914870000	876780000	437060000	435590000	797140000	0	0	351660000
P54495	Glucokinase	glcK	52.124	23.4	1049800000	1333900000	1109100000	866320000	1080800000	1066500000	1029700000	978220000	1138500000	958700000	1183400000	705960000
P54499	UPF0045 protein YqgV	yqgV	6.0339	21.2	433360000	432970000	0	0	480440000	0	358080000	387130000	0	0	0	267360000
P54501	Probable metallo-hydrolase YqgX	yqgX	27.665	8.5	613520000	433240000	448440000	1406800000	925890000	1031900000	1529700000	1321900000	953520000	1501900000	1357700000	1571700000
P54503	Regulatory protein MgsR	mgsR	3.2131	16.7	0	0	33895000	0	0	0	0	0	0	0	0	0
P54504	RsbT co-antagonist protein RsbRD	rsbRD	19.302	10.8	213490000	174730000	0	230390000	191960000	153510000	139350000	180680000	0	0	0	0
P54506	Signal peptidase I W	sipW	70.29	26.3	0	0	227870000	0	0	0	0	0	0	0	0	0
P54507	Spore coat-associated protein N	tasA	323.31	84.7	73733000000	71866000000	41812000000	112220000000	95688000000	94737000000	94099000000	100230000000	81406000000	84743000000	84311000000	121620000000
P54510	Uncharacterized protein YqhL	yqhL	130.64	50	5842800000	9928800000	4840200000	3389500000	2735100000	2812900000	3712400000	3186900000	2793100000	3072300000	3828300000	3103600000
P54511	Octanoyltransferase LipM	lipM	66.132	40.6	2291400000	919490000	2551900000	2487200000	2060700000	1880000000	2159300000	2002500000	1968100000	3168000000	2334600000	2301300000
P54512	Transcriptional regulator MntR	mntR	13.594	33.8	0	0	0	182370000	225800000	202900000	204890000	0	199110000	280100000	406850000	0
P54515	Uncharacterized protein YqhQ	yqhQ	82.105	28.6	267370000	305820000	237490000	0	0	0	0	0	0	0	0	0
P54517	3-dehydroquinate dehydratase	yqhS	73.815	55.4	717270000	499320000	718000000	892110000	1163500000	941660000	861270000	937030000	924810000	783320000	594350000	729960000
P54518	Uncharacterized peptidase YqhT	yqhT	209.01	53.8	943190000	365150000	656680000	2492800000	2469400000	2326600000	3233500000	2894600000	2269200000	2961400000	3401000000	3065700000
P54519	Uncharacterized protein YqhY	yqhY	18.87	14.8	0	8684700000	0	0	0	0	0	3338000000	0	0	0	2945300000
P54520	N utilization substance protein B homolog	nusB	13.665	18.3	475980000	0	0	0	253480000	339060000	279660000	0	0	0	284370000	278240000
P54521	Exodeoxyribonuclease 7 large subunit	xseA	93.254	31	1464700000	1063000000	1026200000	628700000	680680000	521860000	607180000	623140000	592940000	315960000	406890000	510430000
P54523	1-deoxy-D-xylulose-5-phosphate synthase	dxs	54.774	19	262700000	0	477170000	322300000	0	0	0	235500000	178480000	520640000	292500000	346150000
P54524	Probable NADH-dependent flavin oxidoreductase YqiG	yqiG	138.57	50.8	2605500000	2478100000	2022100000	3269300000	3175500000	2936400000	3696900000	3878700000	3553200000	4107200000	4061600000	3570000000
P54527	Uncharacterized protein YqiK	yqiK	8.636	5.3	0	333980000	127470000	0	0	0	0	0	140900000	0	0	0
P54529	Putative sigma L-dependent transcriptional regulator YqiR	yqiR	17.328	14.2	0	794790000	0	0	0	0	0	347950000	0	0	0	360010000
P54530	Probable phosphate butyryltransferase	yqiS	73.231	49.8	668110000	752760000	628740000	760700000	772530000	737660000	883050000	934420000	791880000	589710000	438340000	579670000
P54531	Leucine dehydrogenase	yqiT	167.34	48.6	3425800000	8493400000	3867700000	4377600000	5319000000	5438600000	4796600000	5125000000	5909300000	4443000000	4242800000	3383900000
P54532	Probable butyrate kinase	buk	47.319	22.6	1104100000	1807100000	1077100000	675420000	0	496680000	763930000	700040000	728690000	692920000	599290000	1012800000
P54533	Dihydrolipoyl dehydrogenase	bfmBC	114.18	49.2	663620000	775620000	724740000	852170000	821530000	814910000	1013200000	1117800000	831720000	1172500000	778250000	1038000000
P54534	UPF0403 protein YqiW	yqiW	272.17	69	3005000000	3026100000	5992400000	3612300000	4211800000	4405800000	3808700000	2831400000	3551300000	3952900000	3509500000	3557000000
P54535	Arginine-binding extracellular protein ArtP	artP	41.387	44.7	0	0	0	392610000	324020000	405220000	0	0	0	0	0	0
P54536	Arginine transport system permease protein ArtQ	artQ	13.971	16.4	139460000	127950000	71277000	174490000	0	198520000	0	0	0	0	0	0
P54537	Arginine transport ATP-binding protein ArtM	artM	17.859	22.1	0	0	267150000	0	0	0	0	0	0	0	0	0
P54542	Uncharacterized protein YqjE	yqjE	323.31	74.4	10438000000	13355000000	6929900000	21936000000	19220000000	18271000000	22253000000	20326000000	18701000000	20713000000	18567000000	19638000000
P54544	Membrane protein insertase MisCB	misCB	42.375	13.5	828230000	1835600000	878380000	740020000	0	741220000	821040000	747820000	718940000	896910000	911380000	891600000
P54547	Glucose-6-phosphate 1-dehydrogenase	zwf	323.31	46	7135200000	11261000000	8247800000	10252000000	11065000000	11709000000	11219000000	10891000000	10390000000	10557000000	10741000000	10072000000
P54548	Ribonuclease Z	rnz	7.6982	14.7	0	107920000	0	0	0	0	0	0	0	0	0	0
P54550	NADPH dehydrogenase	namA	323.31	76.3	4658600000	3518500000	4518600000	9634700000	10434000000	9609600000	11158000000	11490000000	12519000000	9911800000	9922100000	10178000000
P54551	Uncharacterized protein YqjN	yqjN	16.176	15.5	0	0	0	125270000	0	118960000	131050000	136060000	148780000	95407000	86261000	89601000
P54552	Pyrroline-5-carboxylate reductase 2	proI	58.44	38.5	0	1230900000	0	0	0	0	0	0	0	0	0	0
P54553	Probable metallo-hydrolase YqjP	yqjP	7.4835	8.8	75561000	0	76837000	0	0	0	53450000	58572000	0	0	0	0
P54554	Uncharacterized oxidoreductase YqjQ	yqjQ	17.678	20.5	0	0	218480000	0	0	0	0	0	0	0	0	0
P54555	Probable D-serine dehydratase	dsdA	56.254	26.3	285350000	272550000	384960000	302170000	435260000	371960000	334180000	327190000	391590000	350260000	365560000	253540000
P54556	Pantothenate kinase	coaA	10.839	16.6	0	0	0	0	0	0	0	0	0	0	145120000	0
P54562	Uncharacterized protein YqjY	yqjY	7.0218	18.6	0	208560000	0	0	0	0	0	0	0	0	0	142220000
P54563	Uncharacterized protein YqjZ	yqjZ	123.7	31.6	412810000	0	220800000	416270000	472700000	373560000	259340000	302940000	294650000	354150000	393910000	342390000
P54564	UPF0157 protein YqkA	yqkA	5.0148	2.9	0	10919000	0	0	0	0	0	0	0	0	0	0
P54565	Uncharacterized protein YqkB	yqkB	14.153	26.2	127210000	0	136580000	0	0	0	0	0	0	0	0	0
P54568	Uncharacterized protein YqkE	yqkE	5.5095	24.3	0	18718000	0	0	0	0	0	0	0	0	0	0
P54569	Uncharacterized oxidoreductase YqkF	yqkF	288.87	52.3	2095800000	1364500000	2342400000	4305400000	4778700000	4849800000	5569800000	5048200000	5043600000	4912500000	4093000000	3596500000
P54570	ADP-ribose pyrophosphatase	nudF	26.399	37.8	1354100000	1140400000	1106200000	831830000	946140000	1147900000	1044700000	831440000	1004700000	833540000	499170000	1093500000
P54571	Malate-2H(+)/Na(+)-lactate antiporter	mleN	13.898	7.7	0	0	0	0	0	0	54409000	0	0	0	134890000	0
P54572	Probable NAD-dependent malic enzyme 1	yqkJ	210.54	49.4	1835500000	2838600000	2222000000	2432100000	2011300000	2284000000	2752100000	2248700000	2268700000	3573300000	2503100000	2773000000
P54574	Ferric uptake regulation protein	fur	30.495	57.7	160620000	259570000	171650000	225750000	201440000	212970000	242040000	200190000	216960000	266570000	302140000	215330000
P54575	Riboflavin biosynthesis protein RibC;Riboflavin kinase;FMN adenylyltransferase	ribC	73.862	47.8	694300000	879080000	1080500000	510690000	470260000	411440000	596530000	507240000	490540000	535310000	460780000	799950000
P54576	Methyl-accepting chemotaxis protein McpC	mcpC	323.31	58.6	5070000000	8411000000	4816000000	3064900000	2784600000	2761500000	2964900000	2828400000	2636900000	2827300000	2798800000	3038300000
P54585	Uncharacterized MFS-type transporter YhcA	yhcA	10.311	2.4	0	0	0	0	0	0	0	0	0	0	83087000	0
P54586	Uncharacterized protein YhcB	yhcB	5.4104	16.5	0	0	0	0	0	0	0	0	0	0	0	302750000
P54587	Uncharacterized protein YhcC	yhcC	5.0642	14.5	0	73914000	0	0	0	0	0	0	0	0	0	0
P54592	Uncharacterized ABC transporter ATP-binding protein YhcH	yhcH	19.311	25.6	0	0	0	265480000	223940000	279210000	265070000	201070000	257260000	0	255520000	226500000
P54593	Uncharacterized protein YhcI	yhcI	6.5862	3.8	0	0	0	0	0	0	0	0	0	145000000	0	0
P54596	L-cystine uptake protein TcyP	tcyP	89.443	8.6	777620000	1510100000	949130000	0	0	0	1027800000	786710000	0	594810000	468320000	1074100000
P54602	Endonuclease YhcR	yhcR	21.892	11.1	0	0	0	0	563230000	0	0	269920000	488070000	0	0	0
P54604	Uncharacterized RNA pseudouridine synthase YhcT	yhcT	2.2532	7.3	0	49727000	0	0	0	0	0	0	0	0	0	0
P54607	Uncharacterized protein YhcW	yhcW	52.726	39.1	343840000	0	512610000	335830000	0	0	326220000	310510000	0	0	0	0
P54608	Hydrolase YhcX	yhcX	32.218	22.4	800170000	757570000	716910000	784170000	714900000	788150000	693140000	944070000	714390000	0	504230000	592600000
P54616	Enoyl-[acyl-carrier-protein] reductase [NADH] FabI	fabI	201.05	65.9	9440200000	5377700000	9619700000	8602600000	10863000000	11559000000	9952100000	9444500000	9859600000	11146000000	11379000000	10404000000
P54617	Phage shock protein A homolog	ydjF	323.31	79.3	7880600000	9885500000	9174900000	3946000000	2838500000	3369200000	3363000000	3447100000	2635200000	2830200000	2312000000	4016000000
P54716	Maltose-6-phosphate glucosidase	glvA	72.171	27.2	164690000	229920000	0	0	0	266290000	0	387530000	245640000	0	0	0
P54717	HTH-type transcriptional regulator GlvR	glvR	6.5965	4.3	0	0	0	0	0	0	0	0	85021000	0	0	0
P54718	Uncharacterized ABC transporter ATP-binding protein YfiB	yfiB	2.942	3.1	0	0	54578000	0	0	0	0	0	0	0	0	0
P54719	Uncharacterized ABC transporter ATP-binding protein YfiC	yfiC	2.6807	5.8	0	73063000	0	0	0	0	0	0	0	0	0	0
P54941	Iron(3+)-hydroxamate-binding protein YxeB	yxeB	319.12	66	8498200000	14234000000	12053000000	8837900000	11885000000	11345000000	9516100000	11465000000	11678000000	7257100000	8072700000	7865100000
P54947	Putative phosphatase YxeH	yxeH	46.975	38.1	2505900000	815960000	2913700000	1829100000	1942600000	1636700000	1881800000	1436100000	1657700000	1603000000	1761600000	1796100000
P54950	Putative monooxygenase YxeK	yxeK	85.587	33.1	0	0	0	0	0	0	333260000	335920000	0	290430000	296870000	307480000
P54952	Probable amino-acid-binding protein YxeM	yxeM	79.792	51.1	0	496210000	0	257360000	215760000	0	318340000	520220000	391320000	270890000	282820000	367150000
P54953	Probable amino-acid permease protein YxeN	yxeN	2.9768	13.4	0	0	60642000	0	0	0	0	0	0	0	0	0
P54955	Uncharacterized hydrolase YxeP	yxeP	58.685	30.3	0	0	0	203270000	368180000	297190000	269660000	173770000	498580000	288750000	0	0
P54956	Uncharacterized protein YxeQ	yxeQ	2.2586	5.4	0	0	0	0	62703000	0	78633000	0	0	0	71953000	54067000
P55179	Peptidase T	pepT	245.15	55.4	5722300000	4228000000	3201000000	14743000000	13963000000	12730000000	14750000000	14755000000	13078000000	13462000000	15856000000	12014000000
P55180	UDP-glucose 4-epimerase	galE	268.95	57.5	7024300000	8941900000	7974500000	10064000000	10085000000	10752000000	12168000000	11010000000	10149000000	13181000000	15499000000	11739000000
P55184	Uncharacterized transcriptional regulatory protein YxjL	yxjL	8.1204	18.3	0	159680000	0	0	0	0	0	0	0	0	0	0
P55192	Uncharacterized protein YbbA	ybbA	5.8685	12.4	0	0	0	0	0	0	0	0	0	15668000	0	0
P55339	ABC-type transporter ATP-binding protein EcsA	ecsA	37.795	27.1	744230000	861440000	785800000	609980000	472610000	528640000	615600000	673930000	495000000	524580000	839140000	774770000
P55340	Protein EcsB	ecsB	12.59	10	0	0	0	0	0	0	0	0	0	0	0	94355000
P55341	Protein EcsC	ecsC	4.7351	11.4	0	0	0	0	0	0	0	0	0	62152000	0	0
P55342	UPF0747 protein YllA	yllA	250.28	49.4	4627500000	3851800000	4640500000	3015400000	3157200000	3127000000	3450900000	3029500000	3074400000	2898800000	2759900000	3162700000
P55343	Transcriptional regulator MraZ	mraZ	7.2459	19.6	0	34841000	0	0	0	0	0	0	0	0	0	0
P55872	Translation initiation factor IF-3	infC	192.6	71.7	18908000000	17759000000	18180000000	18227000000	18267000000	18767000000	18123000000	15756000000	19240000000	16981000000	17627000000	17479000000
P55873	50S ribosomal protein L20	rplT	245.43	50.4	10966000000	13128000000	11344000000	19906000000	17821000000	19335000000	15355000000	21746000000	18650000000	17363000000	17811000000	18794000000
P55874	50S ribosomal protein L35	rpmI	66.167	50	13199000000	10205000000	13796000000	13519000000	18232000000	15033000000	13280000000	12618000000	11472000000	13373000000	10315000000	11419000000
P56849	50S ribosomal protein L33 1	rpmGA	132.55	79.6	23125000000	21891000000	19390000000	45759000000	41272000000	38804000000	41424000000	44633000000	36747000000	25124000000	30231000000	33685000000
P60495	Kinase A inhibitor	kipI	107.49	30.4	2817700000	1775400000	2598400000	1553000000	2050600000	2114100000	1019400000	1083100000	1206300000	1347300000	1132800000	1112300000
P68569	SPBc2 prophage-derived disulfide bond formation protein A	bdbA	15.269	60.6	0	0	0	0	0	0	0	0	141650000	0	0	0
P68571	SPBc2 prophage-derived disulfide bond formation protein B	bdbB	15.192	14.9	2129100000	2645700000	1056100000	0	0	526440000	960520000	2082800000	1152900000	0	0	1174300000
P68575	SPBc2 prophage-derived stress response protein SCP1	yorD	2.2853	18.3	0	0	0	0	0	0	0	0	65232000	0	0	0
P68577	SPBc2 prophage-derived bacteriocin sublancin-168	sunA	150.14	66.1	2579500000	1129100000	3221300000	1852800000	1408800000	1568200000	1061100000	1300000000	1490500000	0	0	2765000000
P68579	SPBc2 prophage-derived sublancin-168-processing and transport ATP-binding protein SunT	sunT	323.31	41.1	9966300000	14157000000	9907900000	8654400000	7031500000	7584900000	8902400000	8849500000	7874000000	8892600000	9432100000	9933700000
P70945	DegV domain-containing protein YitS	yitS	11.518	11.3	206380000	0	202720000	337810000	482770000	363050000	319840000	336970000	412900000	324560000	355110000	0
P70947	Putative phosphatase YitU	yitU	2.2503	6.3	0	110230000	0	0	0	0	0	0	0	0	0	0
P70948	Putative esterase YitV	yitV	74.919	31	784070000	1284100000	702520000	699860000	528980000	536400000	780240000	1035200000	938040000	711900000	811280000	877850000
P70961	Uncharacterized protein YwmD	ywmD	22.435	6.7	0	0	0	0	0	0	0	168770000	246770000	252160000	166210000	0
P70962	Response regulator aspartate phosphatase B	rapB	27.668	26.5	1114100000	1029800000	960830000	932220000	817090000	847130000	804120000	803440000	775220000	952770000	638400000	855080000
P70964	Stress response protein CsbD	csbD	5.1407	33.9	0	11231000	0	0	0	0	0	0	0	0	0	0
P70965	UDP-N-acetylglucosamine 1-carboxyvinyltransferase 1	murAA	283.45	60.8	8293400000	5044700000	9227600000	6020500000	4939000000	5426600000	4816800000	4864700000	4886300000	6638500000	5121700000	6982300000
P70970	Energy-coupling factor transporter ATP-binding protein EcfA2	ecfAB	3.217	8.7	0	281120000	0	0	0	0	0	0	0	0	0	0
P70972	Energy-coupling factor transporter transmembrane protein EcfT	ecfT	6.1914	9.8	0	0	0	0	0	0	0	0	38874000	0	0	0
P70974	50S ribosomal protein L13	rplM	323.31	89.7	71882000000	117230000000	88269000000	73165000000	85333000000	91570000000	73390000000	63485000000	84933000000	70837000000	64398000000	56631000000
P70976	Uncharacterized methyltransferase YbaJ	ybaJ	3.7946	11.4	0	0	0	0	0	0	0	0	0	0	0	47611000
P70981	Probable aminopeptidase YbaC	ybaC	2.7598	3.8	0	42970000	0	0	0	0	0	0	0	0	0	0
P70993	Uncharacterized HTH-type transcriptional regulator YwhA	ywhA	57.293	30.9	0	0	0	0	0	0	0	119030000	0	0	0	164570000
P70994	2-hydroxymuconate tautomerase	ywhB	103.62	58.1	945410000	326950000	289190000	394150000	516650000	247720000	551630000	606130000	301630000	297360000	459300000	613670000
P70995	Putative zinc metalloprotease YwhC	ywhC	5.2942	5	0	0	235630000	0	0	0	0	0	0	0	0	0
P70996	Uncharacterized protein YwhD	ywhD	38.033	35.5	2007500000	2562900000	2021000000	1433800000	1240900000	1311200000	1482000000	1276100000	1249000000	1804600000	1639000000	1489900000
P70998	Polyamine aminopropyltransferase	speE	34.427	30.8	789150000	1288800000	794540000	898580000	949470000	1030200000	1016700000	1057900000	770910000	834690000	751370000	990370000
P70999	Agmatinase	speB	25.256	31	0	0	0	0	595850000	485780000	0	0	0	0	0	0
P71002	Response regulator aspartate phosphatase F	rapF	36.071	18.4	0	692190000	0	0	0	0	0	0	0	0	0	0
P71005	Antilisterial bacteriocin subtilosin biosynthesis protein AlbG	albG	88.633	11.2	1590500000	842880000	1425100000	1509800000	0	0	1984700000	1109600000	1280500000	0	0	1703000000
P71006	Putative zinc protease AlbF	albF	35.725	20.2	350740000	781500000	415750000	0	339960000	312630000	428650000	497590000	432970000	350730000	356650000	306200000
P71007	Antilisterial bacteriocin subtilosin biosynthesis protein AlbE	albE	152.47	50.3	852350000	1543900000	875840000	936310000	718710000	855420000	1196900000	1302700000	1114900000	794990000	1086700000	1546700000
P71009	Putative ABC transporter ATP-binding protein AlbC	albC	90.819	53.1	1529900000	2556800000	1946700000	3923400000	3355300000	3487900000	5201400000	4564900000	4660800000	3488500000	4043900000	3810200000
P71011	Antilisterial bacteriocin subtilosin biosynthesis protein AlbA	albA	323.31	57.4	27549000000	28620000000	33354000000	25607000000	18755000000	20114000000	28672000000	27193000000	23793000000	28288000000	28066000000	29018000000
P71012	PTS system fructose-specific EIIABC component;Fructose-specific phosphotransferase enzyme IIA component;Fructose-specific phosphotransferase enzyme IIB component;Fructose permease IIC component	fruA	114.69	20.6	552180000	1198700000	627570000	386460000	414690000	439580000	504250000	555950000	472050000	603880000	511690000	532220000
P71013	Signal peptidase I T	sipT	15.512	38.3	345800000	0	341360000	326150000	0	0	0	377490000	0	0	0	289400000
P71014	Uncharacterized protein YuaB	yuaB	224.93	60.8	51048000000	57392000000	36492000000	118530000000	108010000000	102710000000	90214000000	96380000000	91081000000	82321000000	72842000000	59789000000
P71015	HTH-type transcriptional repressor GbsR	gbsR	17.797	11.7	0	0	0	0	0	0	0	182120000	0	0	0	0
P71016	Betaine aldehyde dehydrogenase	gbsA	48.226	19.4	382060000	0	676420000	600990000	659420000	701210000	387010000	510810000	609790000	0	0	0
P71017;P71017-2	Alcohol dehydrogenase	gbsB	116.92	32.6	549710000	555970000	0	1199900000	1441200000	1313800000	450860000	713080000	681650000	0	0	754560000
P71018	Phosphate acyltransferase	plsX	126.96	55.6	1555800000	1278100000	2200500000	1788900000	1908000000	1829900000	2279500000	1983000000	2027000000	1926500000	1636400000	1795700000
P71019	Malonyl CoA-acyl carrier protein transacylase	fabD	139.56	44.2	1397000000	1063100000	940420000	1681600000	1890500000	1787300000	2741500000	2238500000	2220600000	1971200000	1855900000	2044600000
P71021	Septum site-determining protein DivIVA	divIVA	323.31	70.1	9951900000	9699300000	11082000000	19380000000	18667000000	18192000000	19159000000	17772000000	18230000000	21174000000	22948000000	20755000000
P71035	Urease subunit beta	ureB	24.158	49.2	256710000	226140000	219060000	291560000	325920000	0	430100000	526900000	406830000	344580000	351860000	316240000
P71036	Putative HTH-type transcriptional regulator YwnA	ywnA	20.652	24.1	0	223040000	0	0	0	0	0	0	0	0	0	0
P71037	Uncharacterized protein YwnB	ywnB	4.5964	9.4	0	0	0	33067000	0	0	0	0	0	0	0	0
P71043	Putative phosphinothricin acetyltransferase YwnH	ywnH	35.03	20.9	0	0	441250000	506920000	0	0	528870000	495490000	564570000	589170000	0	336030000
P71047	Putative HTH-type transcriptional regulator YwgB	ywgB	19.813	19.2	0	309110000	0	116580000	111530000	0	135930000	114620000	111740000	0	0	85205000
P71049	HTH-type transcriptional regulator SlrR	slrR	71.021	32.9	462700000	268560000	378210000	192170000	0	181780000	150020000	249960000	225420000	108620000	0	0
P71051	Putative tyrosine-protein kinase YveL	yveL	34.764	46.7	0	0	0	0	0	0	0	50080000	62259000	0	0	74954000
P71052	Probable polysaccharide biosynthesis protein EpsC	epsC	10.652	18.7	0	893200000	0	0	0	0	0	0	0	0	0	0
P71053	Putative glycosyltransferase EpsD	epsD	12.361	8.7	0	0	45703000	0	0	0	0	0	0	0	0	0
P71054	Putative glycosyltransferase EpsE	epsE	11.006	16.2	472460000	968000000	531370000	0	0	0	247100000	292450000	231100000	0	0	0
P71057	Putative glycosyltransferase EpsH	epsH	13.541	19.5	0	215930000	0	0	0	0	0	0	0	0	0	0
P71058	Putative pyruvyl transferase EpsI	epsI	2.3117	23.7	0	27034000	0	0	0	0	0	0	0	0	0	0
P71065	Putative pyruvyl transferase EpsO	epsO	1.8107	2.2	366950000	0	0	0	0	0	0	0	0	0	0	0
P71066	Uncharacterized protein YvfG	yvfG	40.417	63.9	1539100000	1435300000	1581700000	2047600000	2494300000	2630300000	1931900000	1717100000	2162900000	1369600000	1958700000	1650300000
P71067	L-lactate permease	lutP	29.115	4.3	0	195900000	0	0	0	0	0	0	0	0	0	0
P71070	Uncharacterized protein YukC	yukC	54.832	35.5	834510000	946200000	748210000	637240000	680070000	634460000	657760000	602200000	663600000	683360000	522660000	782620000
P71071	Uncharacterized ubiquitin-like protein YukD	yukD	31.635	46.8	284680000	288900000	255980000	106390000	61034000	87012000	99862000	150780000	113660000	0	0	90334000
P71073	Transcriptional activator AdeR	adeR	6.2685	5.5	0	135610000	0	0	0	0	0	0	0	0	0	0
P71079	Enoyl-[acyl-carrier-protein] reductase [NADPH] FabL	fabL	168.29	64.8	7239000000	9256300000	7730700000	7839300000	7881000000	6885900000	7049800000	7345400000	7389100000	8114100000	6532100000	7744000000
P71082	Putative multidrug export ATP-binding/permease protein YgaD	ygaD	10.671	10.3	182500000	216660000	0	0	0	0	0	0	0	0	0	0
P71084	Glutamate-1-semialdehyde 2,1-aminomutase 2	gsaB	166.14	45.2	5048800000	6677400000	6421000000	4155600000	3952100000	4038400000	4017500000	3918100000	4735600000	4245400000	3990000000	4194400000
P71086	Peroxide operon regulator	perR	59.84	42.8	0	0	363540000	546460000	589560000	536000000	338530000	249370000	596800000	433510000	400000000	442250000
P71088	Sporulation-control protein spo0M	spo0M	215.47	45	8239100000	5188100000	9974800000	7049600000	10498000000	8119400000	6943900000	6598800000	9135800000	7014600000	10199000000	5466900000
P75030	Urease subunit gamma	ureA	15.782	45.7	232250000	0	0	0	0	0	0	114490000	0	0	0	0
P77837	Urease subunit alpha	ureC	234.57	46.6	1480000000	898900000	1104300000	1224600000	1449900000	1505000000	1764200000	2098600000	2016400000	1303300000	1360500000	1213100000
P80238	General stress protein 26	ydaG	108.57	41.4	3631100000	2609900000	1999700000	2661700000	3107700000	1981400000	1748000000	2901800000	1751800000	975430000	1120500000	1568100000
P80239	Alkyl hydroperoxide reductase subunit C	ahpC	251.18	79.1	16788000000	14652000000	15904000000	28417000000	26702000000	23893000000	34594000000	40290000000	34647000000	18438000000	21743000000	29073000000
P80240	Transcription elongation factor GreA	greA	280.16	91.1	11259000000	10488000000	9212300000	9247700000	7989400000	9097300000	13250000000	9760500000	8386000000	16544000000	11836000000	14519000000
P80241	General stress protein 17M	yflT	17.894	19.1	0	163610000	0	0	0	0	0	0	0	0	0	0
P80242	Organic hydroperoxide resistance protein OhrB	ohrB	217.26	70.6	4560200000	2408400000	4708000000	8760500000	8112500000	7151700000	4230800000	3981500000	4722000000	1983000000	1619100000	2861400000
P80244	ATP-dependent Clp protease proteolytic subunit	clpP	272.04	58.4	14320000000	23952000000	15507000000	16530000000	18557000000	19316000000	19000000000	19946000000	19222000000	19767000000	22543000000	20187000000
P80643	Acyl carrier protein	acpA	68.249	58.4	3431600000	3618900000	3271100000	4775000000	3848700000	3656300000	5454400000	4720500000	3902300000	4944600000	4555700000	6816000000
P80698	Trigger factor	tig	323.31	73.6	27587000000	26926000000	26759000000	28297000000	28744000000	28516000000	44664000000	38363000000	33919000000	41193000000	38700000000	48681000000
P80700	Elongation factor Ts	tsf	323.31	85.7	75977000000	78393000000	68928000000	73862000000	74631000000	75290000000	97646000000	85222000000	77303000000	85331000000	90423000000	92502000000
P80858	3-isopropylmalate dehydratase large subunit	leuC	111.69	34.7	1529300000	1959400000	1660700000	931640000	981680000	1117500000	939120000	918540000	1127200000	1198900000	1037400000	737600000
P80859	6-phosphogluconate dehydrogenase, NADP(+)-dependent, decarboxylating	gndA	323.31	82.1	54931000000	59226000000	45094000000	65357000000	79059000000	77348000000	70490000000	56897000000	72237000000	74957000000	91822000000	64089000000
P80860	Glucose-6-phosphate isomerase	pgi	323.31	69.6	23696000000	15249000000	22964000000	41232000000	47574000000	44488000000	44608000000	43773000000	50102000000	39288000000	43114000000	40548000000
P80861	NADH dehydrogenase-like protein YjlD	yjlD	323.31	53.1	72538000000	61208000000	84989000000	48459000000	48811000000	50911000000	42986000000	40864000000	46096000000	55191000000	46665000000	48709000000
P80862	Phosphoserine aminotransferase	serC	280.18	56.8	5113300000	10552000000	4713400000	11242000000	11853000000	12149000000	12201000000	12467000000	12860000000	11870000000	11731000000	9465300000
P80864	Probable thiol peroxidase	tpx	323.31	85	14464000000	5002800000	10860000000	25252000000	25709000000	24767000000	24015000000	24429000000	23260000000	23033000000	21779000000	30090000000
P80865	Succinyl-CoA ligase [ADP-forming] subunit alpha	sucD	323.31	75.7	143510000000	123630000000	152790000000	98859000000	99439000000	96933000000	97370000000	99260000000	101400000000	109680000000	123820000000	107660000000
P80866	Vegetative protein 296	sufC	307.92	95	16953000000	12927000000	14061000000	15651000000	16400000000	16477000000	15461000000	15733000000	15895000000	18282000000	17705000000	14513000000
P80868	Elongation factor G	fusA	323.31	76.7	166790000000	159520000000	164140000000	154610000000	165970000000	160590000000	171690000000	159380000000	156570000000	186820000000	168660000000	179020000000
P80869	Glucose 1-dehydrogenase 2	ycdF	25.405	16.7	0	237720000	0	0	0	0	0	0	0	0	0	0
P80870	General stress protein 13	yugI	60.637	44.6	1119900000	1159200000	1156400000	775410000	0	0	831500000	0	0	1035800000	1161800000	1271700000
P80871	General stress protein 14	ywrO	83.395	49.7	1633600000	1093600000	936410000	1291800000	1444800000	1425600000	1461800000	1323600000	1539600000	903730000	1164500000	1228900000
P80873	General stress protein 39	ydaD	2.9361	12.2	177530000	0	0	0	0	0	0	0	0	0	0	0
P80874	General stress protein 69	yhdN	25.829	25.7	0	0	0	303120000	357520000	0	0	0	326810000	0	231270000	0
P80875	General stress protein 16U	yceD	132.76	45.1	25655000000	43248000000	23766000000	35179000000	26727000000	30624000000	30137000000	27628000000	29123000000	14943000000	12857000000	36218000000
P80876	General stress protein 18	yfkM	37.362	45.3	441440000	0	556980000	516280000	509890000	451140000	374160000	416780000	326260000	0	0	456070000
P80877	5-methyltetrahydropteroyltriglutamate--homocysteine methyltransferase	metE	259.87	39.2	1185300000	1044300000	1002500000	3175800000	3617700000	3101400000	3147600000	3221900000	2865100000	2192600000	2472600000	2575100000
P80878	Probable manganese catalase	ydbD	7.9506	4.4	0	207640000	0	0	0	0	0	0	0	0	0	0
P80879	General stress protein 20U	dps	133.59	92.4	5503800000	4003500000	4408900000	11903000000	17238000000	16827000000	14261000000	13339000000	16854000000	14344000000	18948000000	10853000000
P80880	Thioredoxin reductase	trxB	188.09	58.9	9523800000	5965800000	9507100000	9190500000	9577300000	9813100000	7726700000	7877800000	9022700000	10820000000	9437800000	8915900000
P80885	Pyruvate kinase	pyk	323.31	65.6	62615000000	62332000000	63090000000	33804000000	40461000000	38457000000	40231000000	40604000000	41422000000	36566000000	39868000000	34528000000
P80886	Succinyl-CoA ligase [ADP-forming] subunit beta	sucC	323.31	88.6	234660000000	245650000000	257090000000	199750000000	212720000000	214630000000	208280000000	205660000000	222970000000	245310000000	227870000000	220380000000
P81101	Ribosome-recycling factor	frr	323.31	89.2	18414000000	24933000000	18265000000	23062000000	22380000000	22369000000	24970000000	24284000000	18490000000	23055000000	23656000000	26432000000
P81102	Putative NAD(P)H nitroreductase YodC	yodC	305.1	62.4	6371900000	8677000000	4992900000	9298800000	8716600000	8709200000	8952700000	8400700000	7390500000	8259300000	8019500000	7924500000
P94352	Uncharacterized protein YxjI	yxjI	41.4	33.3	1038000000	744830000	966120000	522770000	365770000	498810000	605930000	525220000	434170000	0	0	513470000
P94356	Uncharacterized protein YxkC	yxkC	323.31	79.4	30357000000	43363000000	25457000000	14516000000	13531000000	13254000000	19667000000	15146000000	12889000000	17543000000	17085000000	16846000000
P94358	Uncharacterized aldehyde dehydrogenase AldY	aldY	4.6108	4.7	0	0	0	0	170370000	150400000	94950000	0	0	0	0	0
P94360	Maltodextrin import ATP-binding protein MsmX	msmX	27.833	17.5	704090000	0	874350000	757700000	729070000	730800000	765160000	664210000	666910000	669820000	800740000	586230000
P94362	Putative membrane metalloprotease YxkI	yxkI	10.964	19.2	94728000	0	0	23467000	0	22858000	0	0	0	0	0	121040000
P94377	Catalase X	katX	27.737	11.3	0	0	0	22158000	0	0	0	0	0	0	0	0
P94388	Cephalosporin-C deacetylase	cah	67.805	63.2	0	0	282060000	588030000	611370000	546150000	730900000	692590000	687170000	635730000	577960000	702330000
P94389	Uncharacterized protein YcgL	ycgL	6.7155	23.8	0	0	0	0	0	0	0	13425000	0	0	0	0
P94390	Proline dehydrogenase 2	ycgM	323.31	56.1	7027800000	5642000000	8283700000	6936100000	6668500000	6212100000	6927700000	6062000000	5468300000	6168900000	5123300000	6304300000
P94391	1-pyrroline-5-carboxylate dehydrogenase 2	ycgN	323.31	74	104170000000	157860000000	111490000000	134920000000	154940000000	150030000000	120840000000	128280000000	132040000000	112490000000	109420000000	122100000000
P94392	Uncharacterized symporter YcgO	ycgO	15.285	5.3	0	0	0	0	0	369450000	0	0	0	0	0	0
P94405	Phenolic acid decarboxylase subunit C	bsdC	7.584	3	41044000	0	0	0	0	0	0	0	0	0	0	0
P94408	Uncharacterized transporter YclF	yclF	3.2226	3	0	75943000	0	0	0	0	0	0	0	0	0	0
P94413	Uncharacterized transcriptional regulatory protein YclJ	yclJ	5.2137	15.9	0	230990000	0	0	0	0	0	0	0	0	0	0
P94415	Response regulator aspartate phosphatase C	rapC	19.464	14.7	0	0	0	0	0	0	0	0	0	313460000	0	0
P94417	Aspartokinase 3	yclM	91.273	23.1	546340000	1163100000	414270000	401070000	410910000	407220000	377150000	438200000	384820000	184830000	278030000	379560000
P94420	Uncharacterized ABC transporter ATP-binding protein YclP	yclP	8.6614	11.5	0	0	289250000	0	0	0	0	0	0	0	0	0
P94421	Uncharacterized ABC transporter solute-binding protein YclQ	yclQ	316.21	53.6	8128000000	19771000000	8339200000	11372000000	11300000000	11660000000	12744000000	12980000000	10320000000	9839400000	10537000000	11127000000
P94422	Uncharacterized MFS-type transporter YcnB	ycnB	4.4574	5.5	0	0	0	0	0	0	0	0	0	0	0	19319000
P94423	Uncharacterized HTH-type transcriptional regulator YcnC	ycnC	3.132	10.3	0	54858000	0	0	0	0	0	0	0	0	0	0
P94424	FMN reductase [NAD(P)H]	nfrA2	88.045	31.3	0	0	0	353750000	407090000	337910000	313090000	277110000	515030000	664500000	736210000	0
P94425	Putative monooxygenase YcnE	ycnE	96.296	71.6	355450000	0	501830000	1020200000	795910000	715060000	971220000	876020000	736040000	743760000	608080000	600380000
P94427	Probable 4-aminobutyrate aminotransferase	gabT	256.96	39.7	3686400000	2832300000	3286900000	4429100000	3496900000	3567700000	4964400000	4821700000	3940500000	4003300000	3622100000	3172200000
P94428	Succinate-semialdehyde dehydrogenase [NADP(+)]	gabD	323.31	51.9	3420600000	5625100000	3085500000	3951200000	4561800000	4350400000	3750400000	4644900000	4618700000	2869700000	3090600000	3219800000
P94431	Uncharacterized protein YcnI	ycnI	192.8	58.3	3730200000	7136900000	3209600000	9821100000	11754000000	11698000000	12544000000	13855000000	14778000000	14922000000	14549000000	14737000000
P94433	HTH-type transcriptional repressor YcnK	ycnK	3.1753	12.6	0	0	90346000	0	0	0	0	0	0	0	0	0
P94443	Negative transcription regulator PadR	padR	2.9864	20.9	0	41630000	0	0	0	0	0	0	0	0	0	0
P94447	Probable transcriptional regulatory protein YrbC	yrbC	8.4772	24.2	0	0	0	0	0	0	0	0	0	0	0	118560000
P94459	Plipastatin synthase subunit D;ATP-dependent proline adenylase;ATP-dependent glutamine adenylase;ATP-dependent tyrosine adenylase 2	ppsD	323.31	32.7	6228400000	8812200000	6995800000	7922900000	8542800000	8376000000	10622000000	9420100000	10349000000	9826900000	8789900000	10212000000
P94461	Primosomal protein N	priA	39.772	17.8	378660000	153180000	0	231670000	0	0	230190000	269910000	173800000	0	0	308440000
P94462	Peptide deformylase 1	defA	47.734	57.5	312760000	0	377050000	498470000	386910000	335520000	327190000	301800000	278750000	343230000	377130000	311470000
P94463	Methionyl-tRNA formyltransferase	fmt	178.66	65.6	3444200000	4763400000	3369200000	3210800000	2599500000	2686600000	3208500000	2661800000	2684400000	2726100000	2321700000	3176000000
P94464	Ribosomal RNA small subunit methyltransferase B	rsmB	111.13	45.4	1361000000	2079700000	1336300000	1066600000	1076100000	1006300000	1118800000	896180000	895680000	1382800000	1476800000	934320000
P94474	Uncharacterized protein YeaC	yeaC	37.288	31.6	457600000	595950000	646940000	453920000	367910000	461080000	376210000	322560000	454500000	320810000	345710000	310270000
P94475	Uncharacterized protein YeaD	yeaD	69.985	9	0	0	0	0	0	0	0	0	0	432210000	0	0
P94476	Uncharacterized protein YebA	yebA	9.7624	4.9	0	67149000	0	0	0	0	0	0	0	0	0	0
P94478	GTPase HflX	hflX	77.06	27.6	624990000	613190000	408360000	0	0	0	177540000	0	382870000	189640000	273260000	0
P94479	Uncharacterized protein YnbB	ynbB	5.9877	12.8	0	0	0	0	0	0	0	87216000	0	0	0	0
P94482	Uncharacterized N-acetyltransferase YnaD	ynaD	29.02	18.8	0	0	0	0	0	0	0	0	232330000	0	0	0
P94490	Xylose repressor	xylR	9.9783	13.8	0	0	108530000	0	0	0	0	0	0	0	0	0
P94492	Endonuclease YncB	yncB	15.207	35.1	0	0	0	0	0	0	0	0	0	12417000	0	0
P94498	Phosphoadenosine phosphosulfate reductase	cysH	20.167	24.9	0	0	0	0	0	0	0	0	0	0	0	652950000
P94501	HTH-type transcriptional regulator GltR	gltR	3.2514	9.5	35184000	0	0	0	0	0	0	0	0	0	0	0
P94504	Transcriptional regulatory protein YvrH	yvrH	72.893	37.1	543240000	882090000	429250000	255960000	334600000	361960000	302800000	305010000	309930000	272420000	544500000	436810000
P94507	Undecaprenyl-diphosphatase	uppP	78.206	29	503520000	708300000	259220000	272280000	231010000	222690000	194850000	447760000	258570000	159350000	218960000	378460000
P94512	Putative uncharacterized hydrolase YsaA	ysaA	104.36	54.6	3359600000	5150200000	3168800000	3724600000	2935300000	3185300000	3345900000	3036100000	2956100000	2847400000	2836200000	2437400000
P94513	Sensor protein LytS	lytS	2.9026	3.5	0	34392000	0	0	0	0	0	0	0	0	0	0
P94514	Sensory transduction protein LytT	lytT	23.255	7.5	224440000	135470000	0	130520000	0	0	193840000	0	0	90223000	127840000	0
P94515	Antiholin-like protein LrgA	lrgA	7.8871	9.6	0	1213300000	0	0	0	0	0	0	0	0	0	0
P94516	Antiholin-like protein LrgB	lrgB	12.421	7.4	3090300000	6067700000	3716900000	491440000	0	0	0	0	0	426130000	0	0
P94520	Sigma-w pathway protein YsdB	ysdB	21.322	30.8	265810000	0	421570000	351970000	317070000	316930000	303290000	250120000	321230000	268980000	316880000	228020000
P94521	Putative aminopeptidase YsdC	ysdC	251.89	42.9	1652400000	612310000	1390100000	3475300000	3508900000	3272900000	3154400000	2501500000	3454300000	3964300000	3870000000	2734200000
P94535	Glycolate oxidase subunit GlcD	glcD	33.445	17.9	190600000	0	0	147930000	153440000	138190000	177180000	0	0	0	0	0
P94538	Uncharacterized tRNA/rRNA methyltransferase YsgA	ysgA	4.9355	13.3	0	32478000	0	0	0	0	0	0	0	0	0	0
P94541	Ribonuclease HIII	rnhC	8.2655	19.5	0	309870000	0	0	0	0	0	0	0	0	0	0
P94544	DNA polymerase/3-5 exonuclease PolX;DNA polymerase type-X;3-5 exodeoxyribonuclease	polX	185.37	43.3	903770000	1383600000	901560000	736770000	1018900000	1066200000	680830000	729640000	932840000	1039300000	985250000	808860000
P94545	Endonuclease MutS2	mutSB	75.186	30.3	831040000	905490000	1099300000	450510000	0	434640000	545730000	435060000	376130000	644350000	413970000	466990000
P94547	Long-chain-fatty-acid--CoA ligase	lcfA	6.8744	7.7	77677000	0	0	0	0	0	0	61624000	0	0	0	0
P94549	Probable enoyl-CoA hydratase	fadB	36.247	49.6	0	0	0	0	0	0	0	0	0	166090000	167570000	0
P94550	Electron transfer flavoprotein subunit beta	etfB	91.566	30.7	348130000	0	0	483780000	644270000	557330000	260540000	280350000	0	0	0	0
P94551	Electron transfer flavoprotein subunit alpha	etfA	147.96	54.5	2030800000	1446700000	977600000	2037900000	3085900000	1797200000	1422300000	1584300000	1370700000	547720000	448200000	968510000
P94556	Glutamate racemase 1	racE	11.343	28.3	0	0	505250000	0	0	0	309250000	203770000	0	0	0	196730000
P94558	Non-canonical purine NTP pyrophosphatase	ysnA	198.78	49.5	3530600000	2763300000	1363600000	4248500000	5571900000	3938200000	3941900000	4196500000	3561800000	3573200000	6357600000	5130900000
P94559	Putative metallophosphoesterase YsnB	ysnB	45.384	37.9	727850000	431640000	758730000	777580000	702740000	784280000	677820000	550650000	796540000	679320000	472960000	540440000
P94565	2-isopropylmalate synthase	leuA	95.24	42.1	990720000	987430000	1011600000	822120000	831790000	921790000	750360000	927740000	824810000	704220000	692030000	792670000
P94568	3-isopropylmalate dehydratase small subunit	leuD	23.845	27.1	1007800000	1098800000	751960000	623280000	482850000	372200000	600360000	643570000	459770000	502740000	233130000	494600000
P94569	TPR repeat-containing protein YsoA	ysoA	8.824	13.5	0	0	295870000	0	0	0	0	0	0	0	0	0
P94573	Uncharacterized isochorismatase family protein YwoC	ywoC	19.771	19.6	222580000	317070000	185690000	151900000	0	179300000	280470000	260700000	246260000	258830000	176130000	229380000
P94576	Uncharacterized protein YwoF	ywoF	81.607	37.2	587930000	1141800000	472840000	0	618420000	582210000	1748000000	1333300000	1292200000	1016400000	1070200000	1397000000
P94583	Response regulator aspartate phosphatase D	rapD	2.4324	2.3	0	89122000	0	0	0	0	0	0	0	0	0	0
P94584	3-hydroxyacyl-[acyl-carrier-protein] dehydratase FabZ	fabZ	28.074	19.9	0	0	0	104310000	0	71992000	0	0	91541000	0	0	0
P94585	Large-conductance mechanosensitive channel	mscL	155.64	16.9	459880000	0	530570000	0	0	0	0	0	405040000	0	0	0
P94588	Uncharacterized protein YwpF	ywpF	104.06	50.7	4579200000	6030900000	4062700000	3228300000	2809400000	2715000000	3099000000	2839300000	2999800000	2827400000	1736800000	2959000000
P94592	Putative phosphatase YwpJ	ywpJ	90.675	24.9	1054400000	706490000	1036100000	705640000	586030000	590790000	862610000	806950000	700220000	738040000	708120000	613380000
P94593	Uncharacterized ATP-dependent helicase YwqA	ywqA	9.0089	7.2	169510000	245500000	136150000	103940000	0	95660000	0	96507000	96974000	105930000	92171000	0
P96499	Putative transcriptional regulator YvhJ	yvhJ	164.07	29.2	768290000	841880000	860690000	940620000	715100000	764220000	922290000	713390000	732410000	861550000	811270000	821580000
P96501	Flagellar hook-associated protein 3	flgL	52.076	29.9	0	303410000	0	0	0	0	0	0	0	0	0	164670000
P96503	Flagellar assembly factor FliW	fliW	22.839	23.8	0	680290000	705000000	0	0	0	592810000	535640000	455920000	0	414010000	522050000
P96575	Putative acyl--CoA ligase YdaB	ydaB	18.012	16.1	220240000	0	0	262320000	281400000	465920000	0	0	291140000	0	0	0
P96578	Probable D-lyxose ketol-isomerase	ydaE	10.517	16.8	0	0	0	96805000	0	0	0	0	0	0	0	0
P96579	Putative ribosomal N-acetyltransferase YdaF	ydaF	20.062	26.8	0	361870000	199720000	472140000	369740000	315390000	306390000	422780000	0	0	0	306300000
P96582	HTH-type transcriptional regulator LrpC	lrpC	28.353	45.8	279090000	0	248240000	283020000	230360000	235070000	304650000	321970000	264600000	0	0	291930000
P96583	DNA topoisomerase 3	topB	264.43	46.8	2077600000	2081800000	1842600000	1648100000	1735700000	1673000000	1689800000	1669600000	1674600000	1547400000	1632700000	1895600000
P96589	Uncharacterized amino acid permease YdaO	ydaO	2.9245	4.3	0	0	0	0	0	0	33314000	0	0	0	0	0
P96591	Putative thiamine pyrophosphate-containing protein YdaP	ydaP	142.23	21.3	763200000	413750000	683280000	466510000	556790000	543610000	362980000	390120000	441920000	0	0	0
P96596	Uncharacterized protein YdbA	ydbA	8.6174	25.4	137240000	120890000	0	0	0	0	0	0	0	0	0	0
P96597	Uncharacterized protein YdbB	ydbB	49.761	43.4	0	405550000	324240000	431970000	344660000	484070000	400800000	325930000	392610000	289510000	375510000	308020000
P96598	Uncharacterized protein YdbC	ydbC	3.2078	26.1	0	0	0	0	114350000	0	0	0	0	0	0	0
P96605	Uncharacterized ABC transporter ATP-binding protein YdbJ	ydbJ	47.099	25	1358500000	1564500000	1870700000	1052700000	1062600000	1004800000	905440000	817320000	940590000	642870000	609510000	883590000
P96608	Putative acyl-CoA dehydrogenase YdbM	ydbM	129.89	37.5	840390000	555690000	605930000	1747500000	2213100000	2144200000	2658900000	2345800000	2420100000	2061400000	1772900000	1555200000
P96611	Thioredoxin-like protein YdbP	ydbP	10.846	23.6	0	0	0	0	0	0	0	193690000	0	0	0	0
P96612	D-alanine--D-alanine ligase	ddl	252.81	61.6	12817000000	12310000000	13061000000	12821000000	13242000000	12735000000	15026000000	13151000000	13496000000	14338000000	11775000000	12650000000
P96613	UDP-N-acetylmuramoyl-tripeptide--D-alanyl-D-alanine ligase	murF	323.31	74.8	26723000000	26741000000	26249000000	22534000000	22725000000	25331000000	26862000000	25410000000	25180000000	27481000000	24980000000	26480000000
P96614	DEAD-box ATP-dependent RNA helicase CshA	cshA	323.31	57.9	20802000000	28471000000	23038000000	17105000000	14900000000	16515000000	17552000000	15967000000	16809000000	19230000000	17519000000	21266000000
P96615	UPF0699 transmembrane protein YdbS	ydbS	105.38	35.8	1248500000	1320800000	920630000	844370000	951950000	850350000	820120000	874250000	1074400000	643020000	632490000	519430000
P96616	UPF0699 transmembrane protein YdbT	ydbT	55.361	19.3	294590000	525930000	0	0	0	0	0	0	0	0	0	0
P96621	Antitoxin EndoAI	ndoAI	37.217	53.8	0	0	0	0	0	0	0	79648000	0	0	0	85075000
P96622	mRNA interferase EndoA	ndoA	18.785	25	0	0	0	279600000	0	505350000	0	0	0	508480000	562270000	0
P96628	Protein SprT-like	ydcK	6.6613	6.7	0	115830000	0	0	0	0	0	0	0	0	0	0
P96633	Putative uncharacterized protein YdcP	ydcP	4.1486	23	0	0	29015000	0	0	0	0	0	0	0	0	26528000
P96647	Uncharacterized protein YddJ	yddJ	19.99	29.4	0	265710000	0	0	0	0	0	0	0	0	0	0
P96648	Uncharacterized protein YddK	yddK	73.693	34.2	680520000	1371100000	1027800000	1037900000	1022500000	1076100000	923080000	675060000	926770000	1236600000	1348600000	733680000
P96650	Uncharacterized protein YddM	yddM	2.9238	5.8	0	238280000	0	0	0	0	0	0	0	0	0	0
P96652	HTH-type transcriptional regulator LrpA	lrpA	7.2934	21.3	0	786690000	0	0	0	0	0	0	0	0	0	0
P96654	Uncharacterized isochorismatase family protein YddQ	yddQ	2.8047	19.4	0	85411000	0	0	0	0	0	0	0	0	0	0
P96655	UPF0173 protein YddR	yddR	7.419	16.1	71513000	0	0	128490000	0	0	99148000	82674000	0	0	0	0
P96658	Uncharacterized protease YdeA	ydeA	3.3198	8.1	0	0	0	0	0	18716000	0	0	0	0	0	0
P96666	Uncharacterized protein YdeI	ydeI	6.6337	18.3	0	0	0	0	0	0	0	0	89029000	0	0	0
P96670	Uncharacterized protein YdeM	ydeM	7.1706	21.3	0	0	0	0	122050000	0	0	0	0	0	0	0
P96672	UPF0750 membrane protein YdeO	ydeO	4.811	5.2	159790000	0	0	0	0	0	0	0	0	0	0	0
P96673	Uncharacterized HTH-type transcriptional regulator YdeP	ydeP	2.6041	10.9	0	0	0	0	0	0	0	0	0	0	0	42756000
P96676	Uncharacterized HTH-type transcriptional regulator YdeS	ydeS	6.981	11.1	0	0	0	0	0	40354000	0	0	0	0	0	0
P96683	Uncharacterized HTH-type transcriptional regulator YdfF	ydfF	8.907	12.8	0	53650000	0	0	0	0	0	0	0	0	0	0
P96684	Uncharacterized protein YdfG	ydfG	9.3205	25.9	376950000	0	244780000	437170000	0	0	507030000	481830000	0	394910000	0	0
P96686	Transcriptional regulatory protein YdfI	ydfI	3.2702	4.7	0	167490000	0	0	0	0	0	0	0	0	0	0
P96688	Uncharacterized carboxylesterase nap	nap	40.35	24	803000000	764940000	714950000	562900000	535820000	549940000	0	381430000	402640000	473990000	0	0
P96693	Putative ring-cleaving dioxygenase MhqO	mhqO	3.7698	9.6	0	61091000	0	0	0	0	0	0	0	0	0	0
P96701	Uncharacterized HTH-type transcriptional regulator YdgC	ydgC	2.1791	5.1	0	0	17200000	0	0	0	0	0	0	0	0	0
P96703	Uncharacterized N-acetyltransferase YdgE	ydgE	9.5345	15.3	0	156140000	0	0	0	0	0	0	0	0	0	0
P96704	Uncharacterized transporter YdgF	ydgF	63.092	7.4	159950000	405350000	0	0	0	0	0	0	0	0	0	0
P96707	Putative NAD(P)H nitroreductase YdgI	ydgI	91.263	59.8	1063200000	403340000	824560000	1343400000	1294500000	1102100000	1443100000	1404000000	1047000000	1274800000	1310000000	1232500000
P96709	Uncharacterized MFS-type transporter YdgK	ydgK	6.052	2.7	0	428310000	0	0	0	0	0	0	0	0	0	0
P96711	Arabinose metabolism transcriptional repressor	araR	12.725	15.5	0	0	0	0	0	0	0	0	0	0	54701000	0
P96714	Uncharacterized protein YwqB	ywqB	9.6464	10.1	94284000	0	154810000	69916000	0	0	0	0	0	0	0	0
P96716	Tyrosine-protein kinase YwqD	ywqD	34.873	42.6	385050000	333160000	239870000	0	0	0	0	178130000	0	0	0	218880000
P96717	Tyrosine-protein phosphatase YwqE	ywqE	14.568	22.4	0	0	202850000	287030000	206030000	0	161430000	175230000	0	0	0	0
P96718	UDP-glucose 6-dehydrogenase YwqF	ywqF	5.7495	4.8	0	0	13785000	0	0	0	0	0	0	0	0	0
P96719	Uncharacterized protein YwqG	ywqG	50.419	19.2	958930000	1762500000	917680000	1307000000	1185100000	1180500000	1375400000	1636000000	870220000	722930000	794670000	1071200000
P96720	Uncharacterized protein YwqH	ywqH	148.93	74.3	1279300000	1375400000	1154600000	1414700000	1400000000	1345200000	1333600000	1208600000	1186500000	1558200000	1397400000	1063700000
P96721	Uncharacterized protein YwqI	ywqI	64.265	72.1	2704200000	1820400000	1849900000	1122000000	894320000	1172800000	1406600000	1434400000	1233900000	689720000	763480000	1419800000
P96722	Putative ribonuclease YwqJ	ywqJ	163.57	34.9	2199400000	3259200000	2880600000	1869400000	2335400000	2426900000	1812200000	1687000000	2035600000	1872900000	1711100000	1302600000
P96723	Putative antitoxin YwqK	ywqK	21.004	24.7	0	2228900000	0	0	1492900000	1416600000	1307500000	2074000000	1532100000	1420600000	1793700000	1699400000
P96724	Endonuclease V	nfi	3.142	4.2	0	0	110920000	0	0	0	0	0	0	0	0	0
P96729	Cell wall-binding protein YwsB	ywsB	56.034	42.1	6321900000	2307400000	3474900000	1692000000	1908600000	1175400000	0	612100000	417630000	1000600000	363960000	465890000
P96736-2;P96736	PGA synthase CapB	capB	19.174	20.2	0	0	0	119810000	0	84757000	355130000	549370000	385550000	402140000	430690000	695750000
P96737	PGA biosynthesis protein CapC	capC	8.0861	10.7	0	0	0	695580000	0	0	0	780040000	533060000	1440800000	0	771520000
P96738	PGA biosynthesis protein CapA	capA	60.109	43.7	0	0	0	0	0	0	0	0	290440000	396630000	370430000	421580000
P96739	Uncharacterized protein YwtC	ywtC	5.1108	21.8	0	0	0	0	0	0	0	0	0	0	0	96079000
P96741	Putative phosphatase YwtE	ywtE	61.399	52.1	2466300000	1152400000	2640300000	2017600000	2325900000	2334500000	2243900000	2062800000	1950800000	2118000000	1906400000	1832900000
P97247	Uncharacterized HTH-type transcriptional regulator YsmB	ysmB	44.327	54.1	726660000	1210600000	491110000	831860000	900590000	696530000	871020000	767550000	814760000	794060000	1041700000	780750000
Q00777	Pyrroline-5-carboxylate reductase 3	proG	21.402	34.2	0	0	0	0	0	73977000	0	0	0	0	0	0
Q00828	Response regulator aspartate phosphatase A	rapA	4.8428	7.4	0	0	20419000	0	0	0	0	0	0	0	0	0
Q01463	Septum site-determining protein MinC	minC	34.687	23	0	27909000	0	0	0	0	0	0	0	0	0	0
Q01464	Septum site-determining protein MinD	minD	211.54	57.8	3882800000	3670200000	4647000000	2850700000	2959000000	3264300000	3374700000	3031600000	3155500000	4291700000	3814100000	3319600000
Q01465	Rod shape-determining protein MreB	mreB	323.31	68.2	16469000000	14086000000	20091000000	11092000000	11395000000	11252000000	11061000000	9532200000	11275000000	12606000000	10699000000	11078000000
Q01466	Cell shape-determining protein MreC	mreC	118.69	41.4	469610000	0	402550000	451840000	402450000	329870000	694620000	1113200000	494430000	594150000	464250000	421000000
Q01620	Protein jag	jag	57.403	41.3	558490000	1140200000	607770000	383890000	462090000	450130000	424750000	309120000	449200000	0	0	200910000
Q01625	Membrane protein insertase MisCA	misCA	11.973	8.4	3121500000	4816600000	2785600000	1907700000	1595800000	1581700000	1945400000	1790800000	1443500000	1433500000	1270300000	1672900000
Q01960	Flagellar biosynthesis protein FlhF	flhF	2.1916	6.8	0	20431000	0	0	0	0	0	0	0	0	0	0
Q02112	Membrane-bound protein LytA	lytA	12.2	14.7	0	408250000	0	0	0	0	0	0	0	0	0	0
Q02113	Amidase enhancer	lytB	323.31	59.6	6957000000	7435000000	6472600000	11649000000	11539000000	11846000000	12205000000	10250000000	8989200000	11789000000	12273000000	12613000000
Q02114	N-acetylmuramoyl-L-alanine amidase LytC	lytC	323.31	79.8	21673000000	20889000000	17899000000	37681000000	36909000000	36166000000	34501000000	36754000000	32110000000	25872000000	23713000000	25430000000
Q02115	Transcriptional regulator LytR	lytR	166.73	52.6	3404700000	5293600000	3870900000	3590400000	3627200000	3678600000	2956000000	3244000000	3590000000	2558500000	2363200000	2815700000
Q02169	Septum formation protein Maf	maf	44.38	26.5	885530000	1185500000	1032800000	915260000	1082600000	1052800000	1267000000	1023400000	1021700000	948750000	867950000	1042100000
Q02886	Protein DinB	dinB	66.415	34.9	166420000	160900000	0	213430000	0	262420000	185930000	0	0	121070000	136010000	182340000
Q03221	Thymidine kinase	tdk	42.139	24.6	367720000	0	369730000	0	0	244260000	0	0	0	0	0	240600000
Q03222	Transcription termination factor Rho	rho	178.65	46.6	4011900000	3983700000	4833000000	3881200000	3485300000	3772900000	4432100000	4528200000	4049000000	4562700000	4227500000	3701400000
Q03223	50S ribosomal protein L31	rpmE	154.22	87.9	7262500000	7057500000	6742700000	20043000000	18532000000	17681000000	21230000000	21976000000	16534000000	7508000000	7163100000	17062000000
Q03224	Fructose-1,6-bisphosphatase class 2	glpX	178.99	48.6	4460700000	5321500000	3274600000	6115500000	7154900000	7236000000	8828500000	8712700000	7945800000	5824400000	5846000000	6403900000
Q03521	Phospho-N-acetylmuramoyl-pentapeptide-transferase	mraY	13.061	3.4	0	0	0	0	0	0	0	0	0	81177000	0	0
Q03522	UDP-N-acetylmuramoylalanine--D-glutamate ligase	murD	138.01	42.4	2569600000	4605900000	3146500000	1268000000	1448800000	1658000000	1674100000	1415800000	1760000000	2035100000	1760500000	1564900000
Q03523	UDP-N-acetylmuramoyl-L-alanyl-D-glutamate--2,6-diaminopimelate ligase	murE	323.31	65.8	8924500000	9449600000	9905100000	5786100000	5254400000	5681500000	5297200000	5297700000	5849800000	6411300000	5623600000	6126300000
Q04385	Uncharacterized protein YgxA	ygxA	67.243	30.6	826860000	1757200000	1557100000	1398800000	1693000000	1898200000	1384400000	1039600000	2003100000	1564000000	1708500000	1431300000
Q04747	Surfactin synthase subunit 2	srfAB	323.31	54.2	44055000000	74570000000	54446000000	48832000000	43615000000	45067000000	59028000000	56263000000	55989000000	72533000000	68368000000	69094000000
Q04777	Alpha-acetolactate decarboxylase	alsD	58.073	44.3	2602000000	3482300000	2370600000	2263600000	2375500000	2354000000	3679300000	3996000000	2967300000	3544300000	3401900000	2633900000
Q04778	HTH-type transcriptional regulator AlsR	alsR	11.841	5	0	0	18016000	0	0	0	0	0	0	0	0	0
Q04789	Acetolactate synthase	alsS	323.31	54	5961500000	5571700000	5487300000	7083900000	7955400000	7133400000	11089000000	9017600000	8972900000	10223000000	10889000000	10188000000
Q04795	Aspartokinase 1	dapG	323.31	49.8	24635000000	25214000000	25454000000	8987300000	9924600000	9956000000	9849400000	9784400000	10671000000	8289100000	8995000000	9318100000
Q04796	4-hydroxy-tetrahydrodipicolinate synthase	dapA	323.31	94.8	12528000000	22780000000	15006000000	18073000000	19399000000	19454000000	20008000000	19853000000	19138000000	17542000000	17245000000	17798000000
Q04797	Aspartate-semialdehyde dehydrogenase	asd	323.31	69.7	8697000000	6673700000	12210000000	17377000000	19649000000	19492000000	18400000000	16407000000	17140000000	18007000000	20091000000	14954000000
Q04805	Uncharacterized zinc protease YmxG	ymxG	153.71	43.8	2020100000	2993500000	1461200000	2036300000	1953700000	2514400000	2096300000	1966900000	1836000000	1790900000	2000700000	2070500000
Q05470	Polyketide synthase PksL	pksL	323.31	25.3	3657000000	5651400000	3982400000	3577800000	3621200000	3715700000	4581900000	4459600000	4242700000	3872800000	3591000000	4526500000
Q05522	Chemotaxis response regulator protein-glutamate methylesterase	cheB	14.386	26.1	0	388670000	0	0	0	0	0	0	0	0	0	0
Q05852	UTP--glucose-1-phosphate uridylyltransferase	gtaB	323.31	61	28694000000	16476000000	35816000000	26862000000	24150000000	27268000000	26309000000	23722000000	24804000000	29972000000	28068000000	29181000000
Q05865	Folylpolyglutamate synthase	folC	12.805	18.1	0	0	262330000	137660000	142240000	155820000	132040000	114420000	136300000	0	0	150480000
Q05873	Valine--tRNA ligase	valS	323.31	53.8	5983000000	5613900000	7126900000	5305100000	6070800000	5762800000	6221800000	5605900000	5624300000	6841800000	6026000000	5887500000
Q06750	Serine acetyltransferase	cysE	26.803	46.1	0	0	0	201270000	0	224790000	285500000	223000000	201260000	269490000	259150000	191090000
Q06752	Cysteine--tRNA ligase	cysS	281.76	59	3144800000	2770200000	3798900000	2428100000	3119400000	2970800000	3252400000	2985600000	2945300000	2908000000	2813700000	3333700000
Q06753	Putative TrmH family tRNA/rRNA methyltransferase YacO	yacO	50.935	44.2	2057100000	3781500000	1633700000	989670000	705560000	658090000	1060200000	1093900000	1060200000	1067000000	1135100000	1098300000
Q06754	Uncharacterized PIN and TRAM-domain containing protein YacL	yacL	74.321	13.4	526070000	882660000	223440000	115000000	120520000	119690000	200440000	302110000	159640000	161030000	160230000	309830000
Q06755	2-C-methyl-D-erythritol 4-phosphate cytidylyltransferase	ispD	7.5905	30.6	0	44221000	0	0	0	0	0	0	0	0	0	0
Q06756	2-C-methyl-D-erythritol 2,4-cyclodiphosphate synthase	ispF	35.024	27.2	1015200000	936410000	847720000	1331100000	1358100000	1244500000	1192800000	1188500000	1163600000	829980000	1019000000	1199500000
Q06795	Transcription termination/antitermination protein NusG	nusG	231.44	77.4	10098000000	16658000000	12046000000	7002500000	5903400000	6659400000	7026000000	5627700000	5875400000	8332500000	7326800000	8638300000
Q06796	50S ribosomal protein L11	rplK	323.31	83.7	31725000000	36654000000	30312000000	32947000000	30839000000	31703000000	31960000000	41386000000	33342000000	24483000000	22074000000	29654000000
Q06797	50S ribosomal protein L1	rplA	323.31	74.1	46077000000	40703000000	51780000000	52792000000	56481000000	55030000000	54495000000	55002000000	57584000000	50292000000	46199000000	44732000000
Q06798	50S ribosomal protein L33 2	rpmGB	4.63	32.7	0	0	18197000	0	0	0	0	0	0	0	0	0
Q06799	Protein translocase subunit SecE	secE	2.5334	18.6	0	3375600	0	0	0	0	0	0	0	0	0	0
Q07428	Nitrogen regulatory PII-like protein	nrgB	133.41	67.2	5491100000	1768200000	3781700000	1824400000	1811000000	1351600000	1223700000	1716400000	1045900000	1583300000	1083100000	1301000000
Q07833	tRNA nuclease WapA	wapA	323.31	41.3	47030000000	42866000000	35778000000	63849000000	57045000000	59158000000	46971000000	44405000000	40922000000	26988000000	27252000000	32017000000
Q07836	Immunity protein WapI	wapI	10.904	34.5	443700000	0	585130000	672440000	495770000	608820000	613240000	495360000	512420000	561620000	514940000	0
Q07868	Penicillin-binding protein 2B	pbpB	44.846	13.4	333320000	159960000	333190000	0	141480000	125080000	127060000	148110000	0	128180000	115790000	0
Q07876	Ribosomal RNA small subunit methyltransferase H	rsmH	65.809	32.8	1002600000	895950000	1139300000	0	0	0	657370000	592620000	0	827420000	730760000	797270000
Q08352	Alanine dehydrogenase	ald	323.31	89.7	32619000000	26398000000	29901000000	42078000000	46842000000	49100000000	50322000000	49613000000	53456000000	52711000000	52655000000	53653000000
Q08429	Kinase-associated lipoprotein B	kapB	89.321	68.8	3047700000	3849000000	3755200000	4085100000	5235300000	5667900000	3959600000	4854900000	4331400000	3470700000	3927500000	3670100000
Q08432	Cystathionine beta-lyase PatB	patB	112.57	41.9	1029000000	655820000	1521600000	843420000	907340000	932880000	1037200000	1269800000	1086700000	1153600000	1219700000	1112800000
Q08787	Surfactin synthase subunit 3	srfAC	323.31	42.3	6266100000	5916500000	6432100000	6000600000	5086200000	5730800000	8626000000	8006100000	6937100000	11009000000	10257000000	9846800000
Q08788	Surfactin synthase thioesterase subunit	srfAD	63.725	20.7	355020000	0	410400000	404980000	538710000	500600000	400970000	412290000	629430000	1375300000	1667000000	877640000
Q08793	Uncharacterized protein YcxB	ycxB	2.7155	5.4	0	118630000	0	0	0	0	0	0	0	0	0	0
Q45061	Putative acyl-CoA thioesterase YneP	yneP	12.404	36.2	0	0	0	172210000	296850000	249140000	0	0	0	274700000	266620000	0
Q45063	Uncharacterized protein YneR	yneR	12.974	45.3	587040000	0	0	393300000	360300000	385560000	227120000	424550000	362800000	0	0	437330000
Q45064	Glycerol-3-phosphate acyltransferase	plsY	49.814	17.6	449900000	762140000	271710000	237410000	221990000	241890000	323540000	269780000	264700000	0	173340000	238630000
Q45065	Uncharacterized protein YneT	yneT	213.18	58.5	1386000000	482040000	2974100000	5181100000	6367600000	7700000000	4440600000	3809000000	5779400000	5749100000	6192600000	4435700000
[truncated: 57 more rows]

## Sheet: Proteins belonging to cluster 1
N = 884
UniProt IDs	Protein Name	Gene Name
C0H3R3	Uncharacterized protein YvzF	yvzF
C0H3S9	Uncharacterized HTH-type transcriptional regulator YbzH	ybzH
C0H437;C0H3Z3	Uncharacterized protein YoyH;Uncharacterized protein YjzI	yoyH;yjzI
C0H447	Uncharacterized protein YpzJ	ypzJ
C0SP86	DNA translocase SftA	sftA
C0SP89	Putative methyl-accepting chemotaxis protein YoaH	yoaH
C0SP93	Acetyl-coenzyme A carboxylase carboxyl transferase subunit beta	accD
C0SP94	Putative ABC transporter substrate-binding lipoprotein YhfQ	yhfQ
C0SPA7	Ftsk domain-containing protein YukB	yukB
C0SPB0	Uncharacterized acyl--CoA ligase YtcI	ytcI
C0SPB4	Uncharacterized ABC transporter ATP-binding protein YhaQ	yhaQ
O05240	Probable NADH-dependent butanol dehydrogenase 2	yugK
O05248	Putative membrane protease YugP	yugP
O05250	Sensor histidine kinase MalK	malK
O05252	Uncharacterized lipoprotein YufN	yufN
O05389	Uncharacterized oxidoreductase YrbE	yrbE
O05398	Uncharacterized protein YrhF	yrhF
O05501	Uncharacterized protein YdhI	ydhI
O05509	HTH-type transcriptional regulator GmuR	gmuR
O05514	Thiamine-monophosphate kinase	thiL
O05516	tRNA threonylcarbamoyladenosine biosynthesis protein TsaB	tsaB
O05518	tRNA N6-adenosine threonylcarbamoyltransferase	tsaD
O05520	Cyclic pyranopterin monophosphate synthase accessory protein	moaC
O05521	Redox-sensing transcriptional repressor Rex	rex
O06473	Multidrug efflux protein YfmO	yfmO
O06476	Uncharacterized ABC transporter ATP-binding protein YfmR	yfmR
O06478	Putative aldehyde dehydrogenase YfmT	yfmT
O06480	Putative HAD-hydrolase YfnB	yfnB
O06490	Uncharacterized protein YetN	yetN
O06491	Glutamyl-tRNA(Gln) amidotransferase subunit A	gatA
O06714	Nuclease SbcCD subunit C	sbcC
O06733	Uncharacterized protein YisX	yisX
O06743	Uncharacterized N-acetyltransferase YitH	yitH
O06747	Uncharacterized protein YitL	yitL
O06967	Multidrug resistance ABC transporter ATP-binding/permease protein BmrA	bmrA
O06972	Uncharacterized Nudix hydrolase YvcI	yvcI
O06978	Uncharacterized transcriptional regulatory protein YvcP	yvcP
O06979	Sensor histidine kinase YvcQ	yvcQ
O07021	Lactate utilization protein B	lutB
O07085	Uncharacterized oxidoreductase CzcO	czcO
O07521	3-5 exoribonuclease YhaM	yhaM
O07543	UPF0754 membrane protein YheB	yheB
O07552	Stress response protein NhaX	nhaX
O07567	NTD biosynthesis operon regulator NtdR	ntdR
O07581	Probable anti-sigma-M factor YhdL	yhdL
O07584	1-acyl-sn-glycerol-3-phosphate acyltransferase	plsC
O07585	UPF0053 protein YhdP	yhdP
O07587	Putative aspartate aminotransferase YhdR	yhdR
O07595	NAD-dependent protein deacetylase	cobB
O07605	Proton/sodium-glutamate symport protein	gltT
O07608	Lipoate-protein ligase LplJ	lplJ
O07614	Uncharacterized N-acetyltransferase YhfO	yhfO
O07615	Putative quinone oxidoreductase YhfP	yhfP
O07619	Uncharacterized acyl--CoA ligase YhfT	yhfT
O07621	Heme-based aerotactic transducer HemAT	hemAT
O07631	GTP-binding protein TypA/BipA homolog	typA
O07636	Uncharacterized protein YlaL	ylaL
O07638	UPF0358 protein YlaN	ylaN
O07906	Uncharacterized HTH-type transcriptional regulator YraN	yraN
O08336	Probable bifunctional P-450/NADPH-P450 reductase 2;Cytochrome P450 102;NADPH--cytochrome P450 reductase	cypE
O31429	Uncharacterized protein SkfG	skfG
O31436	Uncharacterized protein YbdN	ybdN
O31441	Uncharacterized protein YbyB	ybyB
O31446	Uncharacterized protein YbfF	ybfF
O31455	Putative hydrolase YbfO	ybfO
O31457	UPF0176 protein YbfQ	ybfQ
O31461	Branched-chain-amino-acid transaminase 1	ilvE
O31463	Homocysteine S-methyltransferase YbgG	ybgG
O31475	Ferredoxin--NADP reductase 1	ycgT
O31489	Uncharacterized protein YdcI	ydcI
O31501	Swarming motility protein SwrC	swrC
O31503	23S rRNA (uracil-C(5))-methyltransferase RlmCD	rlmCD
O31506	Putative ribonuclease YeeF	yeeF
O31509	Probable transcriptional regulatory protein YeeI	yeeI
O31545	Uncharacterized RNA methyltransferase YfjO	yfjO
O31550	Dihydrolipoyllysine-residue acetyltransferase component of acetoin cleaving system	acoC
O31555	Uncharacterized lipoprotein YfjD	yfjD
O31560	Uncharacterized HTH-type transcriptional regulator YfiR	yfiR
O31562	Putative metal-dependent hydrolase YfiT	yfiT
O31567	Probable siderophore-binding lipoprotein YfiY	yfiY
O31570	Uncharacterized isomerase YfhB	yfhB
O31582	Uncharacterized protein YfhO	yfhO
O31588	Uncharacterized protein YhzB	yhzB
O31590	Putative tRNA (cytidine(34)-2-O)-methyltransferase	cspR
O31607	Group 2 truncated hemoglobin YjbI	yjbI
O31609	Putative triphosphatase YjbK	yjbK
O31612	NAD kinase 1	ppnKA
O31616	Glycine oxidase	thiO
O31618	Thiazole synthase	thiG
O31619	Sulfur carrier protein ThiS adenylyltransferase	thiF
O31620	Hydroxymethylpyrimidine/phosphomethylpyrimidine kinase	thiD
O31628	Uncharacterized N-acetyltransferase YjcF	yjcF
O31632	Cystathionine beta-lyase MetC	metC
O31636	Uncharacterized protein YjcN	yjcN
O31642	Uncharacterized oxidoreductase YjdA	yjdA
O31665	Transaminase MtnE	mtnE
O31667	2-hydroxy-3-keto-5-methylthiopentenyl-1-phosphate phosphatase	mtnX
O31672	HTH-type transcriptional regulator MhqR	mhqR
O31675	7-cyano-7-deazaguanine synthase	queC
O31676	6-carboxy-5,6,7,8-tetrahydropterin synthase	queD
O31678	NADPH-dependent 7-cyano-7-deazaguanine reductase	queF
O31702	Molybdopterin-synthase adenylyltransferase	moeB
O31703	Molybdopterin molybdenumtransferase	moeA
O31709	Membrane protein YknW	yknW
O31710	Putative efflux system component YknX	yknX
O31712	Uncharacterized ABC transporter permease YknZ	yknZ
O31716	Uncharacterized ABC transporter ATP-binding protein YkpA	ykpA
O31723	Uncharacterized ABC transporter ATP-binding protein YlmA	ylmA
O31724	N-formyl-4-amino-5-aminomethyl-2-methylpyrimidine deformylase	ylmB
O31727	UPF0001 protein YlmE	ylmE
O31728	Cell division protein SepF	sepF
O31738	UPF0109 protein YlqC	ylqC
O31743	Ribosome biogenesis GTPase A	rbgA
O31744	Ribonuclease HII	rnhB
O31749	Uridylate kinase	pyrH
O31751	Isoprenyl transferase	uppS
O31754	Regulator of sigma-W protease RasP	rasP
O31755	Proline--tRNA ligase	proS
O31767	Uncharacterized oxidoreductase YmfI	ymfI
O31769	Uncharacterized protein YmfK	ymfK
O31771	Uncharacterized membrane protein YmfM	ymfM
O31773	Putative penicillin-binding protein PbpX	pbpX
O31777	8-amino-7-oxononanoate synthase 1	kbl
O31778	tRNA-2-methylthio-N(6)-dimethylallyladenosine synthase	miaB
O31795	tRNA dimethylallyltransferase	miaA
O31798	Uncharacterized protein YmzA	ymzA
O31806	Uncharacterized protein YndB	yndB
O31820	Thioredoxin-like protein YneN	yneN
O31823	Uncharacterized membrane protein YngC	yngC
O31850	Uncharacterized protein YojN	yojN
O31929	SPBc2 prophage-derived uncharacterized protein YopI	yopI
O31942	SPBc2 prophage-derived uncharacterized lipoprotein YonS	yonS
O31973;P96657	SPBc2 prophage-derived uncharacterized protein YomL;Uncharacterized protein YddT	yomL;yddT
O31975	SPBc2 prophage-derived uncharacterized membrane protein YomJ	yomJ
O31986	SPBc2 prophage-derived glycosyltransferase SunS	sunS
O31989	SPBc2 prophage-derived uncharacterized protein YolF	yolF
O31998	Probable ribonuclease YokI	yokI
O32001	SPBc2 prophage-derived endonuclease YokF	yokF
O32023	Uncharacterized protein YqzC	yqzC
O32028	5-methylthioadenosine/S-adenosylhomocysteine nucleosidase	mtnN
O32033	Uridine kinase	udk
O32034	Uncharacterized protease YrrO	yrrO
O32035	Uncharacterized protease YrrN	yrrN
O32038	Aspartate--tRNA(Asp/Asn) ligase	aspS
O32039	Histidine--tRNA ligase	hisS
O32044	Single-stranded-DNA-specific exonuclease RecJ	recJ
O32047	Protein translocase subunit SecDF	secDF
O32054	S-adenosylmethionine:tRNA ribosyltransferase-isomerase	queA
O32060	Putative sodium/proton-dependent alanine carrier protein YrbD	yrbD
O32076	Uncharacterized protein YuaG	yuaG
O32082	Uncharacterized membrane protein YubF	yubF
O32086	UPF0118 membrane protein YubA	yubA
O32090	Nicotinate phosphoribosyltransferase	pncB
O32092	Uncharacterized protein YueI	yueI
O32099	Benzil reductase ((S)-benzoin forming)	yueD
O32101	Bacteriophage SPP1 adsorption protein YueB	yueB
O32102	Ferri-bacillibactin esterase BesA	besA
O32114	Diaminopimelate epimerase	dapF
O32117	NADH dehydrogenase-like protein YutJ	yutJ
O32119	Putative nitrogen fixation protein YutI	yutI
O32129	Lipoyl synthase	lipA
O32133	Uncharacterized metallophosphoesterase YunD	yunD
O32138	Purine catabolism regulatory protein	pucR
O32144	Probable xanthine dehydrogenase subunit D	pucD
O32159	Uncharacterized oxidoreductase YurR	yurR
O32162	FeS cluster assembly protein SufB	sufB
O32163	Zinc-dependent sulfurtransferase SufU	sufU
O32165	FeS cluster assembly protein SufD	sufD
O32169	Methionine import ATP-binding protein MetN	metN
O32186	Uncharacterized HTH-type transcriptional regulator YusT	yusT
O32188	Probable siderophore transport system ATP-binding protein YusV	yusV
O32192	Transcriptional regulatory protein CssR	cssR
O32213	Sulfite reductase [NADPH] hemoprotein beta-component	cysI
O32219	Cadmium, zinc and cobalt-transporting ATPase	cadA
O32222	Copper-sensing transcriptional repressor CsoR	csoR
O32223	scyllo-inositol 2-dehydrogenase (NADP(+))	iolW
O32231	Ribonuclease R	rnr
O32232	Carboxylesterase	est
O32233	Probable protein-export membrane protein SecG	secG
O32238	Uncharacterized HTH-type transcriptional regulator YvaP	yvaP
O32245	Uncharacterized protein YvbH	yvbH
O32246	Uncharacterized protein YvbI	yvbI
O32247	Uncharacterized membrane protein YvbJ	yvbJ
O32253	Central glycolytic genes regulator	cggR
O32257	Uncharacterized amino acid permease YvbW	yvbW
O32259	Lactate utilization protein C	lutC
O32267	Putative teichuronic acid biosynthesis glycosyltransferase TuaH	tuaH
O32269	Teichuronic acid biosynthesis protein TuaF	tuaF
O32271	UDP-glucose 6-dehydrogenase TuaD	tuaD
O32272	Putative teichuronic acid biosynthesis glycosyltransferase TuaC	tuaC
O32273	Teichuronic acid biosynthesis protein TuaB	tuaB
O32293	Uncharacterized N-acetyltransferase YycN	yycN
O32294	Response regulator aspartate phosphatase G	rapG
O34303	Type-2 restriction enzyme BsuMI component YdjA	ydjA
O34331	Putative rRNA methyltransferase YlbH	ylbH
O34348	Fe(3+)-citrate-binding protein YfmC	yfmC
O34353	Uncharacterized protein YdjN	ydjN
O34358	Serine protease Do-like HtrA	htrA
O34362	Putative HMP/thiamine import ATP-binding protein YkoD	ykoD
O34375	Cell division topological determinant MinJ	minJ
O34391	N-acetylmuramoyl-L-alanine amidase XlyB	xlyB
O34394	Uncharacterized protein YjjA	yjjA
O34399	Glutamate synthase [NADPH] small chain	gltB
O34400	Putative protein YfkA	yfkA
O34424	Uncharacterized membrane protein YteJ	yteJ
O34431	Calcium-transporting ATPase	yloB
O34434	Uncharacterized protein YdjG	ydjG
O34442	Magnesium transporter MgtE	mgtE
O34443	Adenine phosphoribosyltransferase	apt
O34445	Uncharacterized protein YlbN	ylbN
O34448	SPBc2 prophage-derived uncharacterized protein YopQ	yopQ
O34453	Nitric oxide synthase oxygenase	nos
O34459	ATP phosphoribosyltransferase regulatory subunit	hisZ
O34468	Uncharacterized N-acetyltransferase YlbP	ylbP
O34469	Putative ATP-dependent helicase YeeB	yeeB
O34471	Uncharacterized protein YtlQ	ytlQ
O34474	Probable multidrug resistance protein YoeA	yoeA
O34476	Probable cysteine synthase	ytkP
O34478	Uncharacterized protein YccF	yccF
O34481	ATP-dependent RecD-like DNA helicase	yrrC
O34483	HPr kinase/phosphorylase	hprK
O34496	UPF0354 protein YtpQ	ytpQ
O34497	Uncharacterized protein YkgA	ykgA
O34507	Serine/threonine-protein kinase PrkC	prkC
O34510	Fe(3+)-citrate import ATP-binding protein YfmF	yfmF
O34512	Uncharacterized ABC transporter ATP-binding protein YfmM	yfmM
O34513	UPF0348 protein YlbM	ylbM
O34514	o-succinylbenzoate synthase	menC
O34521	PTS system N-acetylglucosamine-specific EIICB component;N-acetylglucosamine permease IIC component;N-acetylglucosamine-specific phosphotransferase enzyme IIB component	nagP
O34522	tRNA (guanine-N(7)-)-methyltransferase	trmB
O34525	Putative signal peptide peptidase SppA	sppA
O34526	Alanine--tRNA ligase	alaS
O34528	Uncharacterized AAA domain-containing protein YrvN	yrvN
O34529	ATP-dependent 6-phosphofructokinase	pfkA
O34572	Putative HMP/thiamine permease protein YkoC	ykoC
O34580	ATP-dependent DNA helicase PcrA	pcrA
O34586	Uncharacterized membrane protein YlbC	ylbC
O34588	Uncharacterized protein YkuJ	ykuJ
O34593	Uncharacterized protein YjqA	yjqA
O34594	Cytochrome c-551	cccB
O34595	Probable tRNA sulfurtransferase	thiI
O34599	Putative cysteine desulfurase IscS 1	iscS1
O34617	Probable dual-specificity RNA methyltransferase RlmN	rlmN
O34618	Uncharacterized amino acid permease YtnA	ytnA
O34628	Uncharacterized protein YvlB	yvlB
O34629	Uncharacterized lipoprotein YerH	yerH
O34632	Sirohydrochlorin ferrochelatase	sirB
O34633	Uncharacterized protein YjlC	yjlC
O34641	ABC transporter ATP-binding protein YtrB	ytrB
O34659	YbbR-like domain-containing protein YbbR	ybbR
O34680	Probable BsuMI modification methylase subunit YdiP	ydiP
O34691	Putative niacin/nicotinamide transporter NaiP	naiP
O34703	Uncharacterized ATPase YjoB	yjoB
O34705	Phospholipase YtpA	ytpA
O34725	Uncharacterized lipoprotein YjhA	yjhA
O34738	Putative HMP/thiamine permease protein YkoE	ykoE
O34745	Uncharacterized symporter YodF	yodF
O34746	3-oxoacyl-[acyl-carrier-protein] synthase 3 protein 1	fabHA
O34748	Probable ATP-dependent DNA helicase RecQ	recQ
O34759	Uncharacterized protein YdjO	ydjO
O34768	Uncharacterized sugar kinase YdjE	ydjE
O34774	Uncharacterized protein YobJ	yobJ
O34784	Uncharacterized membrane protein YobI	yobI
O34789	Uncharacterized protein YdjI	ydjI
O34797	Phosphopantetheine adenylyltransferase	coaD
O34803	Uncharacterized protein YeaA	yeaA
O34805	Uncharacterized ABC transporter substrate-binding lipoprotein YvrC	yvrC
O34809	Uncharacterized protein YceG	yceG
O34814	Cell division ATP-binding protein FtsE	ftsE
O34833	Uncharacterized protein YceH	yceH
O34847	Acetyl-coenzyme A carboxylase carboxyl transferase subunit alpha	accA
O34860	RsbT co-antagonist protein RsbRB	rsbRB
O34863	UvrABC system protein A	uvrA
O34874	Putative cysteine desulfurase IscS 2	iscS2
O34876	Cell division protein FtsX	ftsX
O34885	Type-2 restriction enzyme BsuMI component YdiS	ydiS
O34911	Putative HMP/thiamine-binding protein YkoF	ykoF
O34916	N-acetyldiaminopimelate deacetylase	ykuR
O34921	Uncharacterized protein YtoI	ytoI
O34930	Response regulator aspartate phosphatase K	rapK
O34934	NAD kinase 2	nadK2
O34939	Probable BsuMI modification methylase subunit YdiO	ydiO
O34940	Putative sugar lactone lactonase YvrE	yvrE
O34942	ATP-dependent DNA helicase RecG	recG
O34946	High-affinity zinc uptake system ATP-binding protein ZnuC	znuC
O34948	Uncharacterized oxidoreductase YkwC	ykwC
O34949	Uncharacterized HTH-type transcriptional regulator YkoM	ykoM
O34952	Lipoteichoic acid synthase 2;Glycerol phosphate lipoteichoic acid synthase 2;Processed glycerol phosphate lipoteichoic acid synthase 2	ltaS2
O34966	High-affinity zinc uptake system binding-protein ZnuA	znuA
O34979	Uncharacterized ABC transporter ATP-binding protein YvrO	yvrO
O34981	2,3,4,5-tetrahydropyridine-2,6-dicarboxylate N-acetyltransferase	dapH
O34983	Uncharacterized N-acetyltransferase YoaP	yoaP
O34990	Formyltetrahydrofolate deformylase	purU
O34992	Glycine betaine/carnitine/choline transport ATP-binding protein OpuCA	opuCA
O34994	Transcriptional repressor CcpN	ccpN
O34996	DNA polymerase I	polA
O35004	UPF0603 protein YdjH	ydjH
O35005	ABC transporter permease YtrF	ytrF
O35013	Putative 8-oxo-dGTP diphosphatase YtkD	ytkD
O35016	Low molecular weight protein-tyrosine-phosphatase YfkJ	yfkJ
O35020	tRNA-specific 2-thiouridylase MnmA	mnmA
O35022	FMN-dependent NADH-azoreductase 1	azoR1
O35025	Type-2 restriction enzyme BsuMI component YdiR	ydiR
O35033	Probable coenzyme A biosynthesis bifunctional protein CoaBC;Phosphopantothenoylcysteine decarboxylase;Phosphopantothenate--cysteine ligase	coaBC
O54408	GTP pyrophosphokinase	relA
O68260	Uncharacterized protein YoyC	yoyC
P02394	50S ribosomal protein L7/L12	rplL
P04948	Homoserine kinase	thrB
P04969	30S ribosomal protein S11	rpsK
P05096	DNA primase	dnaG
P05647	50S ribosomal protein L34	rpmH
P05648	Chromosomal replication initiator protein DnaA	dnaA
P05649	DNA polymerase III subunit beta	dnaN
P05652	DNA gyrase subunit B	gyrB
P05653	DNA gyrase subunit A	gyrA
P06224	RNA polymerase sigma factor SigA	sigA
P06533	HTH-type transcriptional regulator SinR	sinR
P06534	Stage 0 sporulation protein A	spo0A
P06574	RNA polymerase sigma-B factor	sigB
P06629	Uncharacterized protein YwjG	ywjG
P08065	Succinate dehydrogenase flavoprotein subunit	sdhA
P08066	Succinate dehydrogenase iron-sulfur subunit	sdhB
P08495	Aspartokinase 2	lysC
P08750	D-alanyl-D-alanine carboxypeptidase DacA	dacA
P09122	DNA polymerase III subunit gamma/tau	dnaX
P09124	Glyceraldehyde-3-phosphate dehydrogenase 1	gapA
P0CI79	Thymidylate synthase 1	thyA1
P10725	Alanine racemase 1	alr1
P11044	Thymidylate synthase 2	thyA2
P11045	Dihydrofolate reductase	dfrA
P11065	HTH-type transcriptional regulator Hpr	hpr
P12011	Gluconokinase	gntK
P12039	Phosphoribosylamine--glycine ligase	purD
P12041	Phosphoribosylformylglycinamidine synthase subunit PurQ	purQ
P12042	Phosphoribosylformylglycinamidine synthase subunit PurL	purL
P12044	N5-carboxyaminoimidazole ribonucleotide mutase	purE
P12045	N5-carboxyaminoimidazole ribonucleotide synthase	purK
P12046	Phosphoribosylaminoimidazole-succinocarboxamide synthase	purC
P12047	Adenylosuccinate lyase	purB
P12048	Bifunctional purine biosynthesis protein PurH;Phosphoribosylaminoimidazolecarboxamide formyltransferase;IMP cyclohydrolase	purH
P12873	50S ribosomal protein L29	rpmC
P12874	30S ribosomal protein S17	rpsQ
P12875	50S ribosomal protein L14	rplN
P12877	50S ribosomal protein L5	rplE
P12878	30S ribosomal protein S14	rpsN1
P12879	30S ribosomal protein S8	rpsH
P13242	CTP synthase	pyrG
P13267	DNA polymerase III PolC-type	polC
P13484	Probable poly(glycerol-phosphate) alpha-glucosyltransferase	tagE
P13485	CDP-glycerol:poly(glycerophosphate) glycerophosphotransferase	tagF
P14194	General stress protein CTC	ctc
P14204	Transcriptional regulatory protein ComA	comA
P14802	Uncharacterized oxidoreductase YoxD	yoxD
P16263	Dihydrolipoyllysine-residue succinyltransferase component of 2-oxoglutarate dehydrogenase complex	odhB
P16304	Adenylate kinase	adk
P16336	Protein translocase subunit SecY	secY
P16497	Sporulation kinase A	kinA
P16524	Putative N-acetyl-LL-diaminopimelate aminotransferase	patA
P16655	Cell division protein DivIB	divIB
P16971	Protein RecA	recA
P17620	Riboflavin biosynthesis protein RibBA;3,4-dihydroxy-2-butanone 4-phosphate synthase;GTP cyclohydrolase-2	ribBA
P17631	Chaperone protein DnaJ	dnaJ
P17731	Histidinol-phosphate aminotransferase	hisC
P17820	Chaperone protein DnaK	dnaK
P17865	Cell division protein FtsZ	ftsZ
P17869	RNA polymerase sigma-H factor	sigH
P17893	Arginine repressor	argR
P17903	Anti-sigma-B factor antagonist	rsbV
P17904	Serine-protein kinase RsbW	rsbW
P17921	Phenylalanine--tRNA ligase alpha subunit	pheS
P17922	Phenylalanine--tRNA ligase beta subunit	pheT
P18156	Glycerol uptake facilitator protein	glpF
P18157	Glycerol kinase	glpK
P18158	Aerobic glycerol-3-phosphate dehydrogenase	glpD
P18159	Phosphoglucomutase	pgcA
P18256	Threonine--tRNA ligase 2	thrZ
P18579	UDP-N-acetylenolpyruvoylglucosamine reductase	murB
P19405	Alkaline phosphatase 3	phoB
P19406	Alkaline phosphatase 4	phoA
P19466	Transcription attenuation protein MtrB	mtrB
P19670	UDP-N-acetylglucosamine 1-carboxyvinyltransferase 2	murAB
P19947	50S ribosomal protein L30	rpmD
P20282	30S ribosomal protein S13	rpsM
P20429	DNA-directed RNA polymerase subunit alpha	rpoA
P20691	3-phosphoshikimate 1-carboxyvinyltransferase	aroA
P20692	Prephenate dehydrogenase	tyrA
P20964	GTPase ObgE	obg
P21203	Prephenate dehydratase	pheA
P21464	30S ribosomal protein S2	rpsB
P21465	30S ribosomal protein S3	rpsC
P21466	30S ribosomal protein S4	rpsD
P21467	30S ribosomal protein S5	rpsE
P21468	30S ribosomal protein S6	rpsF
P21469	30S ribosomal protein S7	rpsG
P21470	30S ribosomal protein S9	rpsI
P21471	30S ribosomal protein S10	rpsJ
P21472	30S ribosomal protein S12	rpsL
P21475	30S ribosomal protein S18	rpsR
P21477	30S ribosomal protein S20	rpsT
P21656	Tryptophan--tRNA ligase	trpS
P21881	Pyruvate dehydrogenase E1 component subunit alpha	pdhA
P21883	Dihydrolipoyllysine-residue acetyltransferase component of pyruvate dehydrogenase complex	pdhC
P21885	Arginine decarboxylase	speA
P23129	2-oxoglutarate dehydrogenase E1 component	odhA
P23445	Flagellum-specific ATP synthase	fliI
P23446	Flagellar basal-body rod protein FlgG	flgG
P23454	FlaA locus 22.9 kDa protein	ylxF
P23477	ATP-dependent helicase/deoxyribonuclease subunit B	addB
P23478	ATP-dependent helicase/nuclease subunit A	addA
P23479	Nuclease SbcCD subunit D	sbcD
P23545	Alkaline phosphatase synthesis sensor protein PhoR	phoR
P23630	Diaminopimelate decarboxylase	lysA
P23971	2-succinylbenzoate--CoA ligase	menE
P23973	Isochorismate synthase MenF	menF
P23974	Putative 2-succinyl-6-hydroxy-2,4-cyclohexadiene-1-carboxylate synthase	menH
P24072	Chemotaxis protein CheY	cheY
P24139	Oligopeptide transport system permease protein OppC	oppC
P24219	RNA polymerase sigma-54 factor	sigL
P24277	Recombination protein RecR	recR
P24501	Flagellar basal-body rod protein FlgC	flgC
P25052	Aminopyrimidine aminohydrolase	tenA
P25053	Thiazole tautomerase	tenI
P25144	Catabolite control protein A	ccpA
P25499	Heat-inducible transcription repressor HrcA	hrcA
P25811	tRNA modification GTPase MnmE	mnmE
P25812	tRNA uridine 5-carboxymethylaminomethyl modification enzyme MnmG	mnmG
P25813	Ribosomal RNA small subunit methyltransferase G	rsmG
P25971	Orotidine 5-phosphate decarboxylase	pyrF
P25972	Orotate phosphoribosyltransferase	pyrE
P25993	Carbamoyl-phosphate synthase pyrimidine-specific small chain	pyrAA
P25994	Carbamoyl-phosphate synthase pyrimidine-specific large chain	pyrAB
P25996	Dihydroorotate dehydrogenase B (NAD(+)), catalytic subunit	pyrD
P26380	Fructose-specific phosphotransferase enzyme IIB component	levE
P26497	Stage 0 sporulation protein J	spo0J
P26899	Aspartate ammonia-lyase	ansB
P26902	D-aminopeptidase	dppA
P26908	50S ribosomal protein L21	rplU
P26935	Inositol 2-dehydrogenase/D-chiro-inositol 3-dehydrogenase	iolG
P27621	Putative CDP-glycerol:glycerophosphate glycerophosphotransferase	tagB
P27623	Glycerol-3-phosphate cytidylyltransferase	tagD
P28264	Cell division protein FtsA	ftsA
P28366	Protein translocase subunit SecA	secA
P28367	Peptide chain release factor 2	prfB
P28611	Motility protein A	motA
P28820	Aminodeoxychorismate synthase component 1	pabB
P28822	Dihydropteroate synthase	sul
P29072	Chemotaxis protein CheA	cheA
P29727	GMP synthase [glutamine-hydrolyzing]	guaA
P30949	Glutamate-1-semialdehyde 2,1-aminomutase	hemL
P31102	3-dehydroquinate synthase	aroB
P31104	Chorismate synthase	aroC
P31105	Chemotaxis protein methyltransferase	cheR
P31112	Heptaprenyl diphosphate synthase component 1	hepS
P32397	Protoporphyrinogen oxidase	hemY
P32436	Protein DegV	degV
P32437	IMPACT family member YvyE	yvyE
P32726	Ribosome maturation factor RimP	rimP
P32727	Transcription termination/antitermination protein NusA	nusA
P32731	Ribosome-binding factor A	rbfA
P32732	tRNA pseudouridine synthase B	truB
P32959	Penicillin-binding protein 4*	pbpE
P32960	Probable amino-acid racemase	racX
P33189	Uncharacterized aminotransferase YhxA	yhxA
P33911	Carbon storage regulator homolog	csrA
P35136	D-3-phosphoglycerate dehydrogenase	serA
P35154	Segregation and condensation protein A	scpA
P35156	Uncharacterized protein YpuI	ypuI
P35159	Ribosomal large subunit pseudouridine synthase B	rluB
P35165	RNA polymerase sigma factor SigX	sigX
P35166	Sigma-X negative effector	rsiX
P36945	Ribokinase	rbsK
P37105	Signal recognition particle protein	ffh
P37251	Acetolactate synthase large subunit	ilvB
P37252	Acetolactate synthase small subunit	ilvH
P37455	Single-stranded DNA-binding protein A	ssbA
P37464	Serine--tRNA ligase	serS
P37465	Methionine--tRNA ligase	metG
P37467	Protein XpaC	xpaC
P37468	Ribosomal RNA small subunit methyltransferase A	rsmA
P37474	Transcription-repair-coupling factor	mfd
P37476	ATP-dependent zinc metalloprotease FtsH	ftsH
P37477	Lysine--tRNA ligase	lysS
P37478	Transcriptional regulatory protein YycF	yycF
P37484	Uncharacterized protein YybT	yybT
P37485	Uncharacterized protein YybS	yybS
P37490	Uncharacterized protein YybN	yybN
P37494	Uncharacterized ABC transporter ATP-binding protein YybJ	yybJ
P37513	Uncharacterized protein YyaK	yyaK
P37518	Ribosome-binding ATPase YchF	ychF
P37524	Nucleoid occlusion protein	noc
P37529	Deoxyadenosine/deoxycytidine kinase	dck
P37530	Deoxyguanosine kinase	dgk
P37535	Uncharacterized protein YaaN	yaaN
P37537	Thymidylate kinase	tmk
P37540	DNA polymerase III subunit delta	holB
P37541	Stage 0 sporulation protein YaaT	yaaT
P37542	Initiation-control protein YabA	yabA
P37543	Uncharacterized protein YabB	yabB
P37550	4-diphosphocytidyl-2-C-methyl-D-erythritol kinase	ispE
P37557	Uncharacterized protein YabO	yabO
P37560	Uncharacterized protein YabR	yabR
P37564	Type III pantothenate kinase	coaX
P37565	33 kDa chaperonin	hslO
P37567	Probable tRNA-dihydrouridine synthase 1	dus1
P37571	Negative regulator of genetic competence ClpC/MecB	clpC
P37572	DNA repair protein RadA homolog	radA
P37573	DNA integrity scanning protein DisA	disA
P37580	Iron(3+)-hydroxamate-binding protein FhuD	fhuD
P37582	HTH-type transcriptional regulator GlnR	glnR
P37585	UDP-N-acetylglucosamine--N-acetylmuramyl-(pentapeptide) pyrophosphoryl-undecaprenol N-acetylglucosamine transferase	murG
P37807	50S ribosomal protein L28	rpmB
P37870	DNA-directed RNA polymerase subunit beta	rpoB
P37871	DNA-directed RNA polymerase subunit beta	rpoC
P37872	Uncharacterized protein YbxB	ybxB
P37876	Uncharacterized protein YtxK	ytxK
P37877	Acetate kinase	ackA
P37942	Lipoamide acyltransferase component of branched-chain alpha-keto acid dehydrogenase complex	bfmBB
P37944	Shikimate kinase	aroK
P37945	Lon protease 1	lon1
P37946	L-threonine dehydratase biosynthetic IlvA	ilvA
P37948	Glycerol-3-phosphate transporter	glpT
P37949	Elongation factor 4	lepA
P37954	UvrABC system protein B	uvrB
P37957	Lipase EstA	estA
P38022	Arginine utilization regulatory protein RocR	rocR
P38032	L-aspartate oxidase	nadB
P38033	Putative cysteine desulfurase NifS	nifS
P38493	Cytidylate kinase	cmk
P39062	Acetyl-coenzyme A synthetase	acsA
P39074	Putative lipid kinase BmrU	bmrU
P39131	UDP-N-acetylglucosamine 2-epimerase	mnaA
P39135	4-phosphopantetheinyl transferase sfp	sfp
P39137	Amino-acid permease RocE	rocE
P39142	Pyrimidine-nucleoside phosphorylase	pdp
P39149	Uracil phosphoribosyltransferase	upp
P39153	Threonylcarbamoyl-AMP synthase	ywlC
P39155	Protein-arginine-phosphatase	ywlE
P39158	Cold shock protein CspC	cspC
P39209	Methyl-accepting chemotaxis protein TlpC	tlpC
P39214	Methyl-accepting chemotaxis protein McpA	mcpA
P39215	Methyl-accepting chemotaxis protein McpB	mcpB
P39216	Methyl-accepting chemotaxis protein TlpA	tlpA
P39217	Methyl-accepting chemotaxis protein TlpB	tlpB
P39456	L-cystine import ATP-binding protein TcyC	tcyC
P39574	Galactokinase	galK
P39576	Branched-chain-amino-acid aminotransferase 2	ilvK
P39578	Protein DltD	dltD
P39581	D-alanine--poly(phosphoribitol) ligase subunit 1	dltA
P39582	1,4-dihydroxy-2-naphthoate octaprenyltransferase	menA
P39587	Putative ribosomal RNA large subunit methyltransferase YwbD	ywbD
P39593	Hydroxyethylthiazole kinase	thiM
P39596	Probable iron uptake system component EfeM	efeM
P39597	Probable deferrochelatase/peroxidase EfeN	efeN
P39605	FMN reductase (NADPH)	nfrA1
P39606	Uncharacterized protein YwcH	ywcH
P39610	Pyridoxine kinase	pdxK
P39617	Uncharacterized protein YwdI	ywdI
P39641	Alanine-anticapsin ligase BacD	bacD
P39644	Bacilysin biosynthesis oxidoreductase YwfH	ywfH
P39647	HTH-type transcriptional regulator CysL	cysL
P39648	Octanoyl-[GcvH]:protein N-octanoyltransferase	lipL
P39651	Uncharacterized protein YwfO	ywfO
P39667	Transcription repressor NadR	nadR
P39751	MreB-like protein	mbl
P39756	Protein FdhD homolog	fdhD
P39757	Cyclic pyranopterin monophosphate synthase	moaA
P39760	Ktr system potassium uptake protein C	ktrC
P39761	Adenine deaminase	adeC
P39763	Protein MreBH	mreBH
P39764	Sporulation kinase C	kinC
P39765	Bifunctional protein PyrR;Pyrimidine operon regulatory protein;Uracil phosphoribosyltransferase	pyrR
P39771	Phosphoribosylglycinamide formyltransferase 2	purT
P39787	DNA replication protein DnaD	dnaD
P39793	Penicillin-binding protein 1A/1B;Penicillin-insensitive transglycosylase;Penicillin-sensitive transpeptidase	ponA
P39802	Chemotaxis protein CheW	cheW
P39805	Transcription antiterminator LicT	licT
P39810	Flagellar hook-associated protein 1	flgK
P39812	Glutamate synthase [NADPH] large chain	gltA
P39814	DNA topoisomerase 1	topA
P39816	Putative PTS system glucosamine-specific EIICBA component;Glucosamine permease IIC component;Glucosamine-specific phosphotransferase enzyme IIB component;Glucosamine-specific phosphotransferase enzyme IIA component	gamP
P39820	Glutamate 5-kinase 1	proB
P39821	Gamma-glutamyl phosphate reductase	proA
P39822	Phosphatidylserine decarboxylase proenzyme;Phosphatidylserine decarboxylase alpha chain;Phosphatidylserine decarboxylase beta chain	psd
P40399	Phosphoserine phosphatase RsbU	rsbU
P40403	CheY-P phosphatase CheC	cheC
P40739	PTS system beta-glucoside-specific EIIBCA component;Beta-glucoside-specific phosphotransferase enzyme IIB component;Beta-glucoside permease IIC component;Beta-glucoside-specific phosphotransferase enzyme IIA component	bglP
P40750	Penicillin-binding protein 4	pbpD
P40775	Uncharacterized protein YdjM	ydjM
P40778	UDP-N-acetylmuramate--L-alanine ligase	murC
P40872	Polyketide synthase PksM	pksM
P40924	Phosphoglycerate kinase	pgk
P42061	Oligopeptide-binding protein AppA	appA
P42062	Oligopeptide transport system permease protein AppB	appB
P42063	Oligopeptide transport system permease protein AppC	appC
P42064	Oligopeptide transport ATP-binding protein AppD	appD
P42065	Oligopeptide transport ATP-binding protein AppF	appF
P42085	Xanthine phosphoribosyltransferase	xpt
P42086	Xanthine permease	pbuX
P42100	Glycerate kinase	glxK
P42108	Uncharacterized protein YxaI	yxaI
P42182	GTPase Era	era
P42199	L-cystine-binding protein TcyA	tcyA
P42239	Uncharacterized HTH-type transcriptional regulator YcbG	ycbG
P42242	Uncharacterized protein YcbJ	ycbJ
P42251	Alkaline phosphatase D	phoD
P42295	Uncharacterized protein YxiC	yxiC
P42296	Ribonuclease YxiD	yxiD
P42298	Uncharacterized protein YxiF	yxiF
P42305	ATP-dependent RNA helicase DbpA	dbpA
P42400	Probable ABC transporter extracellular-binding protein YckB	yckB
P42409	RsbT co-antagonist protein RsbRA	rsbRA
P42410	RsbT antagonist protein RsbS	rsbS
P42411	Serine/threonine-protein kinase RsbT	rsbT
P42412	Methylmalonate semialdehyde dehydrogenase [acylating]	iolA
P42420	6-phospho-5-dehydro-2-deoxy-D-gluconate aldolase	iolJ
P42437	Uroporphyrinogen-III C-methyltransferase	nasF
P42921	50S ribosomal protein L4	rplD
P42954	Teichoic acids export ATP-binding protein TagH	tagH
P42959	Signal peptidase I U	sipU
P42963	UPF0271 protein YcsF	ycsF
P42964	Uncharacterized membrane protein YcsG	ycsG
P42966	UPF0317 protein YcsI	ycsI
P42971	Penicillin-binding protein 3	pbpC
P42976	4-hydroxy-tetrahydrodipicolinate reductase	dapB
P42979	Uncharacterized protein YpjD	ypjD
P42982	N-acetyl-alpha-D-glucosaminyl L-malate synthase	bshA
P45708	UPF0154 protein YneF	yneF
P45740	Phosphomethylpyrimidine synthase	thiC
P45745	Dimodular nonribosomal peptide synthase	dhbF
P45858	2-methylcitrate synthase	mmgD
P45861	Uncharacterized ABC transporter ATP-binding protein YwjA	ywjA
P45872	Peptide chain release factor 1	prfA
P45941	Antitoxin YqcF	yqcF
P45942	Ribonuclease YqcG	yqcG
P46208	Chaperone protein HtpG	htpG
P46323	Putative competence-damage inducible protein	cinA
P46324	Uncharacterized ABC transporter permease YvrN	yvrN
P46325	Uncharacterized protein YxbA	yxbA
P46328	Uncharacterized protein YxbD	yxbD
P46338	Phosphate-binding protein PstS	pstS
P46339	Probable ABC transporter permease protein YqgH	yqgH
P46341	Phosphate import ATP-binding protein PstB 2	pstB2
P46342	Phosphate import ATP-binding protein PstB 1	pstB1
P46343	PhoH-like protein	phoH
P46899	50S ribosomal protein L18	rplR
P46918	Minor teichoic acid biosynthesis protein GgaB	ggaB
P46919	Glycerol-3-phosphate dehydrogenase [NAD(P)+]	gpsA
P46921	Glycine betaine transport system permease protein OpuAB	opuAB
P49778	Elongation factor P	efp
P49787	Biotin carboxylase 1	accC1
P49849	DNA mismatch repair protein MutS	mutS
P49850	DNA mismatch repair protein MutL	mutL
P49851	Uncharacterized acyl-CoA thioester hydrolase YkhA	ykhA
P50620	Ribonucleoside-diphosphate reductase subunit alpha	nrdE
P50735	Cryptic catabolic NAD-specific glutamate dehydrogenase GudB	gudB
P50736	Uncharacterized protein YpdA	ypdA
P50740	Isopentenyl-diphosphate delta-isomerase	fni
P50743	GTPase Der	der
P50830	Uncharacterized ATP-dependent helicase YprA	yprA
P50831	Probable ATP-dependent helicase YpvA	ypvA
P50840	Putative RNA methyltransferase YpsC	ypsC
P50842	2-dehydro-3-deoxy-D-gluconate 5-dehydrogenase	kduD
P50845	2-dehydro-3-deoxygluconokinase	kdgK
P50849	Polyribonucleotide nucleotidyltransferase	pnp
P50866	ATP-dependent Clp protease ATP-binding subunit ClpX	clpX
P51785	Dihydroxy-acid dehydratase	ilvD
P51833	Ribonuclease 3	rnc
P51834	Chromosome partition protein Smc	smc
P51835	Signal recognition particle receptor FtsY	ftsY
P52035	Glutathione peroxidase homolog BsaA	bsaA
P52998	Pantothenate synthetase	panC
P53001	Aspartate aminotransferase	aspB
P53554	Biotin biosynthesis cytochrome P450	bioI
P53556	8-amino-7-oxononanoate synthase 2	bioF
P53557	Biotin synthase	bioB
P53558	ATP-dependent dethiobiotin synthetase BioD	bioD
P53559	6-carboxyhexanoate--CoA ligase	bioW
P53560	Uncharacterized protein YtbQ	ytbQ
P54159	Uncharacterized protein YpbR	ypbR
P54161	5-3 exonuclease	ypcP
P54167	Homoserine O-succinyltransferase	metA
P54169	Uncharacterized protein YpgR	ypgR
P54170	UPF0403 protein YphP	yphP
P54304	Oxygen-independent coproporphyrinogen-III oxidase-like protein YqeR	hemN
P54374	Shikimate dehydrogenase (NADP(+))	aroE
P54376	Probable glycine dehydrogenase (decarboxylating) subunit 1	gcvPA
P54377	Probable glycine dehydrogenase (decarboxylating) subunit 2	gcvPB
P54378	Aminomethyltransferase	gcvT
P54380	Glycine--tRNA ligase alpha subunit	glyQ
P54381	Glycine--tRNA ligase beta subunit	glyS
P54382	Bifunctional protein FolD;Methylenetetrahydrofolate dehydrogenase;Methenyltetrahydrofolate cyclohydrolase	folD
P54389	TPR repeat-containing protein YpiA	ypiA
P54390	UPF0302 protein YpiB	ypiB
P54394	Probable ATP-dependent helicase DinG homolog	dinG
P54419	S-adenosylmethionine synthase	metK
P54420	Asparagine synthetase [glutamine-hydrolyzing] 1	asnB
P54421	Probable peptidoglycan endopeptidase LytE	lytE
P54453	Uncharacterized protein YqeH	yqeH
P54457	Ribosomal silencing factor RsfS	rsfS
P54458	Putative methyltransferase YqeM	yqeM
P54460	Ribosomal protein L11 methyltransferase	prmA
P54462	Threonylcarbamoyladenosine tRNA methylthiotransferase MtaB	mtaB
P54464	Uncharacterized protein YqeY	yqeY
P54465	Uncharacterized protein YqeZ	yqeZ
P54466	UPF0365 protein YqfA	yqfA
P54470	Putative pyruvate, phosphate dikinase regulatory protein	yqfL
P54473	4-hydroxy-3-methylbut-2-enyl diphosphate reductase	ispH
P54475	DEAD-box ATP-dependent RNA helicase CshB	cshB
P54476	Probable endonuclease 4	nfo
P54482	4-hydroxy-3-methylbut-2-en-1-yl diphosphate synthase (flavodoxin)	ispG
P54488	Uncharacterized protein YqgF	yqgF
P54495	Glucokinase	glcK
P54499	UPF0045 protein YqgV	yqgV
P54506	Signal peptidase I W	sipW
P54510	Uncharacterized protein YqhL	yqhL
P54515	Uncharacterized protein YqhQ	yqhQ
P54519	Uncharacterized protein YqhY	yqhY
P54521	Exodeoxyribonuclease 7 large subunit	xseA
P54527	Uncharacterized protein YqiK	yqiK
P54529	Putative sigma L-dependent transcriptional regulator YqiR	yqiR
P54532	Probable butyrate kinase	buk
P54534	UPF0403 protein YqiW	yqiW
P54536	Arginine transport system permease protein ArtQ	artQ
P54544	Membrane protein insertase MisCB	misCB
P54548	Ribonuclease Z	rnz
P54552	Pyrroline-5-carboxylate reductase 2	proI
P54554	Uncharacterized oxidoreductase YqjQ	yqjQ
P54562	Uncharacterized protein YqjY	yqjY
P54565	Uncharacterized protein YqkB	yqkB
P54570	ADP-ribose pyrophosphatase	nudF
P54575	Riboflavin biosynthesis protein RibC;Riboflavin kinase;FMN adenylyltransferase	ribC
P54576	Methyl-accepting chemotaxis protein McpC	mcpC
P54596	L-cystine uptake protein TcyP	tcyP
P54607	Uncharacterized protein YhcW	yhcW
P54617	Phage shock protein A homolog	ydjF
P54947	Putative phosphatase YxeH	yxeH
P55184	Uncharacterized transcriptional regulatory protein YxjL	yxjL
P55339	ABC-type transporter ATP-binding protein EcsA	ecsA
P55342	UPF0747 protein YllA	yllA
P55872	Translation initiation factor IF-3	infC
P60495	Kinase A inhibitor	kipI
P68571	SPBc2 prophage-derived disulfide bond formation protein B	bdbB
P68575	SPBc2 prophage-derived stress response protein SCP1	yorD
P68577	SPBc2 prophage-derived bacteriocin sublancin-168	sunA
P68579	SPBc2 prophage-derived sublancin-168-processing and transport ATP-binding protein SunT	sunT
P70948	Putative esterase YitV	yitV
P70962	Response regulator aspartate phosphatase B	rapB
P70965	UDP-N-acetylglucosamine 1-carboxyvinyltransferase 1	murAA
P70970	Energy-coupling factor transporter ATP-binding protein EcfA2	ecfAB
P70974	50S ribosomal protein L13	rplM
P70994	2-hydroxymuconate tautomerase	ywhB
P70995	Putative zinc metalloprotease YwhC	ywhC
P70996	Uncharacterized protein YwhD	ywhD
P71002	Response regulator aspartate phosphatase F	rapF
P71006	Putative zinc protease AlbF	albF
P71011	Antilisterial bacteriocin subtilosin biosynthesis protein AlbA	albA
P71012	PTS system fructose-specific EIIABC component;Fructose-specific phosphotransferase enzyme IIA component;Fructose-specific phosphotransferase enzyme IIB component;Fructose permease IIC component	fruA
P71013	Signal peptidase I T	sipT
P71036	Putative HTH-type transcriptional regulator YwnA	ywnA
P71049	HTH-type transcriptional regulator SlrR	slrR
P71052	Probable polysaccharide biosynthesis protein EpsC	epsC
P71054	Putative glycosyltransferase EpsE	epsE
P71057	Putative glycosyltransferase EpsH	epsH
P71065	Putative pyruvyl transferase EpsO	epsO
P71067	L-lactate permease	lutP
P71070	Uncharacterized protein YukC	yukC
P71071	Uncharacterized ubiquitin-like protein YukD	yukD
P71079	Enoyl-[acyl-carrier-protein] reductase [NADPH] FabL	fabL
P71082	Putative multidrug export ATP-binding/permease protein YgaD	ygaD
P71084	Glutamate-1-semialdehyde 2,1-aminomutase 2	gsaB
P71088	Sporulation-control protein spo0M	spo0M
P75030	Urease subunit gamma	ureA
P80241	General stress protein 17M	yflT
P80858	3-isopropylmalate dehydratase large subunit	leuC
P80861	NADH dehydrogenase-like protein YjlD	yjlD
P80865	Succinyl-CoA ligase [ADP-forming] subunit alpha	sucD
P80869	Glucose 1-dehydrogenase 2	ycdF
P80870	General stress protein 13	yugI
P80878	Probable manganese catalase	ydbD
P80885	Pyruvate kinase	pyk
P80886	Succinyl-CoA ligase [ADP-forming] subunit beta	sucC
P94352	Uncharacterized protein YxjI	yxjI
P94356	Uncharacterized protein YxkC	yxkC
P94390	Proline dehydrogenase 2	ycgM
P94408	Uncharacterized transporter YclF	yclF
P94413	Uncharacterized transcriptional regulatory protein YclJ	yclJ
P94417	Aspartokinase 3	yclM
P94420	Uncharacterized ABC transporter ATP-binding protein YclP	yclP
P94421	Uncharacterized ABC transporter solute-binding protein YclQ	yclQ
P94463	Methionyl-tRNA formyltransferase	fmt
P94464	Ribosomal RNA small subunit methyltransferase B	rsmB
P94474	Uncharacterized protein YeaC	yeaC
P94478	GTPase HflX	hflX
P94490	Xylose repressor	xylR
P94504	Transcriptional regulatory protein YvrH	yvrH
P94507	Undecaprenyl-diphosphatase	uppP
P94512	Putative uncharacterized hydrolase YsaA	ysaA
P94514	Sensory transduction protein LytT	lytT
P94515	Antiholin-like protein LrgA	lrgA
P94516	Antiholin-like protein LrgB	lrgB
P94541	Ribonuclease HIII	rnhC
P94544	DNA polymerase/3-5 exonuclease PolX;DNA polymerase type-X;3-5 exodeoxyribonuclease	polX
P94545	Endonuclease MutS2	mutSB
P94549	Probable enoyl-CoA hydratase	fadB
P94556	Glutamate racemase 1	racE
P94565	2-isopropylmalate synthase	leuA
P94568	3-isopropylmalate dehydratase small subunit	leuD
P94569	TPR repeat-containing protein YsoA	ysoA
P94573	Uncharacterized isochorismatase family protein YwoC	ywoC
P94585	Large-conductance mechanosensitive channel	mscL
P94588	Uncharacterized protein YwpF	ywpF
P94592	Putative phosphatase YwpJ	ywpJ
P94593	Uncharacterized ATP-dependent helicase YwqA	ywqA
P96501	Flagellar hook-associated protein 3	flgL
P96503	Flagellar assembly factor FliW	fliW
P96583	DNA topoisomerase 3	topB
P96596	Uncharacterized protein YdbA	ydbA
P96605	Uncharacterized ABC transporter ATP-binding protein YdbJ	ydbJ
P96613	UDP-N-acetylmuramoyl-tripeptide--D-alanyl-D-alanine ligase	murF
P96614	DEAD-box ATP-dependent RNA helicase CshA	cshA
P96615	UPF0699 transmembrane protein YdbS	ydbS
P96616	UPF0699 transmembrane protein YdbT	ydbT
P96647	Uncharacterized protein YddJ	yddJ
P96650	Uncharacterized protein YddM	yddM
P96652	HTH-type transcriptional regulator LrpA	lrpA
P96654	Uncharacterized isochorismatase family protein YddQ	yddQ
P96672	UPF0750 membrane protein YdeO	ydeO
P96683	Uncharacterized HTH-type transcriptional regulator YdfF	ydfF
P96686	Transcriptional regulatory protein YdfI	ydfI
P96688	Uncharacterized carboxylesterase nap	nap
P96704	Uncharacterized transporter YdgF	ydgF
P96709	Uncharacterized MFS-type transporter YdgK	ydgK
P96714	Uncharacterized protein YwqB	ywqB
P96716	Tyrosine-protein kinase YwqD	ywqD
P96721	Uncharacterized protein YwqI	ywqI
P96722	Putative ribonuclease YwqJ	ywqJ
P96729	Cell wall-binding protein YwsB	ywsB
Q01464	Septum site-determining protein MinD	minD
Q01465	Rod shape-determining protein MreB	mreB
Q01625	Membrane protein insertase MisCA	misCA
Q02112	Membrane-bound protein LytA	lytA
Q02115	Transcriptional regulator LytR	lytR
Q03221	Thymidine kinase	tdk
Q03222	Transcription termination factor Rho	rho
Q03522	UDP-N-acetylmuramoylalanine--D-glutamate ligase	murD
Q03523	UDP-N-acetylmuramoyl-L-alanyl-D-glutamate--2,6-diaminopimelate ligase	murE
Q04795	Aspartokinase 1	dapG
Q04805	Uncharacterized zinc protease YmxG	ymxG
Q05470	Polyketide synthase PksL	pksL
Q05522	Chemotaxis response regulator protein-glutamate methylesterase	cheB
Q05873	Valine--tRNA ligase	valS
Q06752	Cysteine--tRNA ligase	cysS
Q06753	Putative TrmH family tRNA/rRNA methyltransferase YacO	yacO
Q06754	Uncharacterized PIN and TRAM-domain containing protein YacL	yacL
Q06795	Transcription termination/antitermination protein NusG	nusG
Q07428	Nitrogen regulatory PII-like protein	nrgB
Q07868	Penicillin-binding protein 2B	pbpB
Q07876	Ribosomal RNA small subunit methyltransferase H	rsmH
Q45064	Glycerol-3-phosphate acyltransferase	plsY
Q45068	Amino-acid carrier protein AlsT	alsT
Q45477	Isoleucine--tRNA ligase	ileS
Q45480	Uncharacterized RNA pseudouridine synthase YlyB	ylyB
Q45539	Putative glycosyltransferase CsbB	csbB
Q45549	Transcriptional repressor NrdR	nrdR
Q45577	Probable amino acid-proton symporter YbeC	ybeC
Q45588	Anti-sigma-W factor RsiW	rsiW
Q45589	Uncharacterized protein YbbP	ybbP
Q45595	Putative peptide biosynthesis protein YydG	yydG
Q45598	Uncharacterized protein YydD	yydD
Q45599	Uncharacterized protein YydC	yydC
Q45600	Uncharacterized metallophosphoesterase-like protein YydB	yydB
Q45601	Ribosomal RNA large subunit methyltransferase H	rlmH
Q45614	Sensor histidine kinase YycG	yycG
Q45666	HTH-type transcriptional regulator TnrA	tnrA
Q59192	DNA topoisomerase 4 subunit B	parE
Q795M6	Putative aminotransferase YugH	yugH
Q795R8	Uncharacterized protein YtfP	ytfP
Q796K8	Penicillin-binding protein H	pbpH
Q796V8	Oxygen-independent coproporphyrinogen-III oxidase-like protein HemZ	hemZ
Q796Z1	UPF0374 protein YgaC	ygaC
Q797B3	Lipoteichoic acid synthase 1;Glycerol phosphate lipoteichoic acid synthase 1;Processed glycerol phosphate lipoteichoic acid synthase 1	ltaS1
Q7WY77	KipI antagonist	kipA
Q7WY78	Putative transcriptional regulator YwtF	ywtF
Q9JMQ1	Probable HTH-type transcriptional repressor ExuR	exuR

## Sheet: Proteins belonging to cluster 2
N = 273
UniProt IDs	Protein Name	Gene Name
C0H3V8	Uncharacterized protein YyzM	yyzM
O05396	Uncharacterized protein YrhD	yrhD
O05405	Uncharacterized protein YrhO	yrhO
O05497	Uncharacterized protein YdhF	ydhF
O05502	Uncharacterized protein YdhJ	ydhJ
O05503	Uncharacterized protein YdhK	ydhK
O06745	Bifunctional homocysteine S-methyltransferase/5,10-methylenetetrahydrofolate reductase;Homocysteine S-methyltransferase;5,10-methylenetetrahydrofolate reductase	yitJ
O06746	UPF0234 protein yitk	yitK
O06966	Putative uncharacterized protein YvcB	yvcB
O06986	LOG family protein YvdD	yvdD
O07012	Beta-galactosidase GanA	ganA
O07523	Uncharacterized protein YhaP	yhaP
O07529	FMN-dependent NADPH-azoreductase	azr
O07550	Probable multidrug resistance ABC transporter ATP-binding/permease protein YheI	yheI
O07555	Uncharacterized protein YhjA	yhjA
O07573	HTH-type transcriptional regulator NsrR	nsrR
O07596	Putative polysaccharide deacetylase YheN	yheN
O07618	Putative acetyl-CoA C-acetyltransferase YhfS	yhfS
O07633	Uncharacterized protein YlaI	ylaI
O08455	Uncharacterized protein YhaN	yhaN
O31404	Acetoin:2,6-dichlorophenolindophenol oxidoreductase subunit alpha	acoA
O31447	Uncharacterized protein YbfG	ybfG
O31451	Uncharacterized protein YbfJ	ybfJ
O31452	Carboxylesterase YbfK	ybfK
O31458	Probable glucosamine-6-phosphate deaminase 2	gamA
O31484	Uncharacterized protein YczJ	yczJ
O31498	DNA ligase	ligA
O31502	Diacylglycerol kinase	dagK
O31512	Uncharacterized oxidoreductase YesF	yesF
O31534	Heme-degrading monooxygenase HmoA	hmoA
O31579	Uncharacterized protein YfhK	yfhK
O31581	AB hydrolase superfamily protein YfhM	yfhM
O31584	Probable A/G-specific adenine glycosylase YfhQ	yfhQ
O31593	Putative efflux system component YhbJ	yhbJ
O31629	Putative phosphoesterase YjcG	yjcG
O31633	Putative ribosomal-protein-alanine acetyltransferase	yjcK
O31638	Uncharacterized protein YjcP	yjcP
O31655	Anti-sigma-I factor RsgI	rsgI
O31657	Protease HtpX homolog	htpX
O31661	Sporulation kinase E	kinE
O31669	Acireductone dioxygenase	mtnD
O31698	CBS domain-containing protein YkuL	ykuL
O31711	Uncharacterized ABC transporter ATP-binding protein YknY	yknY
O31717	Uncharacterized oxidoreductase YkpB	ykpB
O31740	Ribosome maturation factor RimM	rimM
O31774	Ribonuclease Y	rny
O31775	Uncharacterized protein ymdB	ymdB
O31784	Polyketide synthase PksR	pksR
O31787	Uncharacterized protein YmaE	ymaE
O31796	RNA-binding protein Hfq	hfq
O31800	UPF0457 protein YnzG	ynzG
O31827	Plipastatin synthase subunit E;ATP-dependent isoleucine adenylase	ppsE
O31847	Uncharacterized protein YozO	yozO
O31852	D-gamma-glutamyl-meso-diaminopimelic acid endopeptidase CwlS	cwlS
O31856	RsbT co-antagonist protein RsbRC	rsbRC
O31928	SPBc2 prophage-derived uncharacterized protein YopJ	yopJ
O31935	SPBc2 prophage-derived uncharacterized protein YopC	yopC
O31974	SPBc2 prophage-derived uncharacterized protein YomK	yomK
O31997	Antitoxin YokJ	yokJ
O32000	SPBc2 prophage-derived pesticidal crystal protein-like YokG	yokG
O32031	Uncharacterized membrane protein YrrS	yrrS
O32049	Post-transcriptional regulator ComN	comN
O32055	Holliday junction ATP-dependent DNA helicase RuvB	ruvB
O32075	Uncharacterized N-acetyltransferase YuaI	yuaI
O32083	Exo-glucosaminidase LytG	lytG
O32152	Uncharacterized HTH-type transcriptional regulator YurK	yurK
O32157	Fructosamine deglycase FrlB	frlB
O32176	Probable acyl-CoA dehydrogenase	fadE
O32177	3-ketoacyl-CoA thiolase	fadA
O32181	Uncharacterized HTH-type transcriptional regulator YusO	yusO
O32204	Putative arginine/ornithine antiporter	yusO
O32220	Copper-exporting P-type ATPase A	copA
O32230	SsrA-binding protein	smpB
O32243	Glycine betaine/carnitine/choline-binding protein OpuCC	opuCC
O32254	Uncharacterized protein YvbT	yvbT
O32264	Probable 2-ketogluconate reductase	yvcT
O32265	Uncharacterized protein YvzA	yvzA
O32283	Uncharacterized protein YxzF	yxzF
O34308	Putative oxidoreductase YtkK	ytkK
O34309	Putative phosphoenolpyruvate synthase	pps
O34347	Argininosuccinate synthase	argG
O34357	Thioredoxin-like protein YtpP	ytpP
O34380	Uncharacterized protein YbcI	ybcI
O34383	Uncharacterized sodium-dependent transporter YocR	yocR
O34384	Uncharacterized protein YceE	yceE
O34392	ABC transporter ATP-binding protein YtrE	ytrE
O34418	Uncharacterized protein YfkI	yfkI
O34425	Glyceraldehyde-3-phosphate dehydrogenase 2	gapB
O34426	S-adenosylmethionine decarboxylase proenzyme;S-adenosylmethionine decarboxylase beta chain;S-adenosylmethionine decarboxylase alpha chain	speH
O34452	TPR repeat-containing protein YrrB	yrrB
O34482	L-asparaginase 2	ansZ
O34484	Methionine aminopeptidase 2	mapB
O34533	Uncharacterized HTH-type transcriptional regulator YtcD	ytcD
O34536	Uncharacterized N-acetyltransferase YfmK	yfmK
O34557	Ribulose-phosphate 3-epimerase	rpe
O34558	SPBc2 prophage-derived uncharacterized protein YopR	yopR
O34589	Probable flavodoxin-2	ykuP
O34591	Acetoin:2,6-dichlorophenolindophenol oxidoreductase subunit beta	acoB
O34607	Probable L-serine dehydratase, alpha chain	sdaAA
O34627	Blue-light photoreceptor	pfyP
O34645	Alpha-galactosidase	melA
O34666	Carboxy-terminal processing protease CtpA	ctpA
O34667	S-ribosylhomocysteine lyase	luxS
O34687	50S ribosomal protein L32	rpmF
O34717	Probable 2,4-dienoyl-CoA reductase	fadH
O34722	Uncharacterized protein YfmG	yfmG
O34737	Probable flavodoxin-1	ykuN
O34750	Probable ATP-dependent RNA helicase YfmL	yfmL
O34752	Prolipoprotein diacylglyceryl transferase	lgt
O34756	Putative ABC transporter ATP-binding protein YjkB	yjkB
O34758	UPF0755 protein YrrL	yrrL
O34762	Organic hydroperoxide resistance protein OhrA	ohrA
O34779	Protein phosphatase PrpC	prpC
O34824	Phosphoglucosamine mutase	glmM
O34825	Polyketide biosynthesis malonyl CoA-acyl carrier protein transacylase PksC	pksC
O34827	Uncharacterized HTH-type transcriptional regulator YkuM	ykuM
O34829	Uncharacterized HTH-type transcriptional regulator MsmR	msmR
O34889	Sporulation-delaying protein SdpA	sdpA
O34922	Uncharacterized membrane protein YtpI	ytpI
O34951	Sensory transduction protein BceR	bceR
O34977	Uncharacterized ABC transporter ATP-binding protein YthP	ythP
O35007	Putative efflux system protein YvrP	yvrP
O35014	Uncharacterized EAL-domain containing protein YkuI	ykuI
O35044	Sensor protein BceS	bceS
O35046	Putative carboxypeptidase YocD	yocD
P04189	Subtilisin E	aprE
P06535	Sporulation initiation phosphotransferase B	spo0B
P06567	Primosomal protein DnaI	dnaI
P08064	Succinate dehydrogenase cytochrome b558 subunit	sdhC
P0C8M5	Transcriptional regulator SlrA	slrA
P11742	Methylated-DNA--protein-cysteine methyltransferase, constitutive	ogt
P12013	6-phosphogluconate dehydrogenase, NAD(+)-dependent, decarboxylating	gntZ
P12043	Phosphoribosylformylglycinamidine cyclo-ligase	purM
P12669	DNA-entry nuclease inhibitor	nin
P13799	Signal transduction histidine-protein kinase/phosphatase DegS	degS
P14205	Putative esterase ComA2	yuxO
P15874	Protein GrpE	grpE
P17894	DNA repair protein RecN	recN
P18185	Carbamoyl-phosphate synthase arginine-specific large chain	carB
P19582	Homoserine dehydrogenase	hom
P19672	Putative rRNA methyltransferase YqxC	yqxC
P20278	50S ribosomal protein L36	rpmJ
P21458	DNA translocase SpoIIIE	spoIIIE
P21880	Dihydrolipoyl dehydrogenase	pdhD
P23914	Transcriptional regulatory protein LevR;Putative phosphotransferase EIIA component	levR
P24011	Cytochrome c oxidase subunit 2	ctaC
P24136	Oligopeptide transport ATP-binding protein OppD	oppD
P24138	Oligopeptide transport system permease protein OppB	oppB
P24141	Oligopeptide-binding protein OppA	oppA
P24327	Foldase protein PrsA	prsA
P25148	General stress protein A	gspA
P25503	Urocanate hydratase	hutU
P25814	Ribonuclease P protein component	rnpA
P26906	Dipeptide-binding protein DppE	dppE
P28628	Signal peptidase I S	sipS
P28823	Dihydroneopterin aldolase	folB
P32393	ComE operon protein 2	comEB
P35146	3-dehydroquinate dehydratase	aroD
P36430	Leucine--tRNA ligase	leuS
P36839	Acetylornithine aminotransferase	argD
P37104	UPF0122 protein YlxM	ylxM
P37454	Exodeoxyribonuclease	exoA
P37469	Replicative DNA helicase	dnaC
P37538	Uncharacterized protein YaaQ	yaaQ
P37547	Ribonuclease M5	rnmV
P37552	2-iminobutanoate/2-iminopropanoate deaminase	yabJ
P37570	Protein-arginine kinase	mcsB
P37584	Protein CsaA	csaA
P37814	ATP synthase subunit b	atpF
P37815	ATP synthase subunit c	atpE
P37941	2-oxoisovalerate dehydrogenase subunit beta	bfmBAB
P37967	Para-nitrobenzyl esterase	pnbA
P39071	2,3-dihydro-2,3-dihydroxybenzoate dehydrogenase	dhbA
P39157	UPF0340 protein YwlG	ywlG
P39575	Galactose-1-phosphate uridylyltransferase	galT
P39595	Ferrous iron permease EfeU	efeU
P39616	Probable aldehyde dehydrogenase YwdH	ywdH
P39632	Uncharacterized protein YweA	yweA
P39633	Catabolic NAD-specific glutamate dehydrogenase RocG	rocG
P39773	2,3-bisphosphoglycerate-independent phosphoglycerate mutase	gpmI
P39803	UPF0750 membrane protein YitT	yitT
P39807	Uncharacterized protein YvyF	yvyF
P39808	Uncharacterized protein YvyG	yvyG
P39841	Putative mannose-6-phosphate isomerase YvyI	yvyI
P39845	Plipastatin synthase subunit A;ATP-dependent glutamate adenylase 1;ATP-dependent ornithine adenylase	ppsA
P39846	Plipastatin synthase subunit B;ATP-dependent tyrosine adenylase 1;ATP-dependent threonine adenylase	ppsB
P40408	HTH-type transcriptional activator Btr	btr
P40758	Sensor histidine kinase GlnK	glnK
P40805	Probable polyketide biosynthesis enoyl-CoA hydratase PksH	pksH
P40949	Uncharacterized protein YqxM	yqxM
P42246	Uncharacterized ABC transporter ATP-binding protein YcbN	ycbN
P42319	Uncharacterized protein YxjH	yxjH
P42413	5-deoxy-glucuronate isomerase	iolB
P42419	Inosose isomerase	iolI
P42956	PTS system mannitol-specific EIICB component;Mannitol permease IIC component;Mannitol-specific phosphotransferase enzyme IIB component	mtlA
P42972	Uncharacterized oxidoreductase YcsN	ycsN
P45693	Stage V sporulation protein S	spoVS
P45709	Protein CcdB	ccdB
P45866	Uncharacterized protein FadF	fadF
P45914	Uncharacterized protein YqaR	yqaR
P45920	Uncharacterized protein YqbD	yqbD
P46318	Lichenan-specific phosphotransferase enzyme IIB component	licB
P46326	Uncharacterized protein YxbB	yxbB
P46327	Uncharacterized protein YxbC	yxbC
P46912	Menaquinol-cytochrome c reductase cytochrome b subunit	qcrB
P46922	Glycine betaine-binding protein OpuAC	opuAC
P54156	Putative sigma L-dependent transcriptional regulator YplP	yplP
P54173	Uncharacterized protein YpjQ	ypjQ
P54179	Uncharacterized protein YpmS	ypmS
P54383	Farnesyl diphosphate synthase	ispA
P54447	Uncharacterized protein YqeB	yqeB
P54456	Uncharacterized protein YqeK	yqeK
P54471	tRNA (adenine(22)-N(1))-methyltransferase	trmK
P54472	Putative GTP cyclohydrolase 1 type 2	yqfO
P54479	Zinc-specific metallo-regulatory protein	zur
P54480	Putative nucleotidase YqfW	yqfW
P54504	RsbT co-antagonist protein RsbRD	rsbRD
P54530	Probable phosphate butyryltransferase	yqiS
P54531	Leucine dehydrogenase	yqiT
P54537	Arginine transport ATP-binding protein ArtM	artM
P54553	Probable metallo-hydrolase YqjP	yqjP
P54604	Uncharacterized RNA pseudouridine synthase YhcT	yhcT
P54608	Hydrolase YhcX	yhcX
P54716	Maltose-6-phosphate glucosidase	glvA
P54717	HTH-type transcriptional regulator GlvR	glvR
P54719	Uncharacterized ABC transporter ATP-binding protein YfiC	yfiC
P54941	Iron(3+)-hydroxamate-binding protein YxeB	yxeB
P70947	Putative phosphatase YitU	yitU
P70998	Polyamine aminopropyltransferase	speE
P71005	Antilisterial bacteriocin subtilosin biosynthesis protein AlbG	albG
P71016	Betaine aldehyde dehydrogenase	gbsA
P71017;P71017-2	Alcohol dehydrogenase	gbsB
P71047	Putative HTH-type transcriptional regulator YwgB	ywgB
P71051	Putative tyrosine-protein kinase YveL	yveL
P71073	Transcriptional activator AdeR	adeR
P80238	General stress protein 26	ydaG
P80242	Organic hydroperoxide resistance protein OhrB	ohrB
P80871	General stress protein 14	ywrO
P80873	General stress protein 39	ydaD
P80875	General stress protein 16U	yceD
P80876	General stress protein 18	yfkM
P94422	Uncharacterized MFS-type transporter YcnB	ycnB
P94428	Succinate-semialdehyde dehydrogenase [NADP(+)]	gabD
P94461	Primosomal protein N	priA
P94476	Uncharacterized protein YebA	yebA
P94479	Uncharacterized protein YnbB	ynbB
P94492	Endonuclease YncB	yncB
P94550	Electron transfer flavoprotein subunit beta	etfB
P94551	Electron transfer flavoprotein subunit alpha	etfA
P94559	Putative metallophosphoesterase YsnB	ysnB
P94583	Response regulator aspartate phosphatase D	rapD
P96579	Putative ribosomal N-acetyltransferase YdaF	ydaF
P96582	HTH-type transcriptional regulator LrpC	lrpC
P96591	Putative thiamine pyrophosphate-containing protein YdaP	ydaP
P96611	Thioredoxin-like protein YdbP	ydbP
P96612	D-alanine--D-alanine ligase	ddl
P96628	Protein SprT-like	ydcK
P96684	Uncharacterized protein YdfG	ydfG
P96703	Uncharacterized N-acetyltransferase YdgE	ydgE
P96717	Tyrosine-protein phosphatase YwqE	ywqE
P96719	Uncharacterized protein YwqG	ywqG
P96741	Putative phosphatase YwtE	ywtE
Q01620	Protein jag	jag
Q02169	Septum formation protein Maf	maf
Q05865	Folylpolyglutamate synthase	folC
Q06796	50S ribosomal protein L11	rplK
Q07833	tRNA nuclease WapA	wapA
Q45063	Uncharacterized protein YneR	yneR
Q45582	N-acetylmuramic acid 6-phosphate etherase	murQ
Q45593	Probable peptide export ATP-binding protein YydI	yydI
Q795Q5	Uncharacterized membrane protein YttA	yttA
Q797A7	Uncharacterized amino acid permease YfnA	yfnA
Q79F14	Extracellular esterase EstB	estB

## Sheet: Proteins belonging to cluster 3
N = 69
UniProt IDs	Protein Name	Gene Name
O05269	GMP reductase	guaC
O05519	Uncharacterized ABC transporter ATP-binding protein YdiF	ydiF
O06481	Uncharacterized MFS-type transporter YfnC	yfnC
O06728	Putative phytoene/squalene synthase YisP	yisP
O06968	TPR repeat-containing protein YvcD	yvcD
O07576	Uncharacterized amino acid permease YhdG	yhdG
O31500	Uncharacterized HTH-type transcriptional regulator YerO	yerO
O31564	Uncharacterized HTH-type transcriptional regulator YfiV	yfiV
O31648	Uncharacterized N-acetyltransferase YjdG	yjdG
O31753	1-deoxy-D-xylulose 5-phosphate reductoisomerase	dxr
O31930	SPBc2 prophage-derived uncharacterized protein YopH	yopH
O32030	Uncharacterized protein YrzA	yrzA
O32141	Uric acid degradation bifunctional protein PucL;2-oxo-4-hydroxy-4-carboxy-5-ureidoimidazoline decarboxylase;Uricase	pucL
O32148	Purine catabolism protein PucG	pucG
O34450	N-acetylglucosamine-6-phosphate deacetylase	nagA
O34600	Bifunctional oligoribonuclease and PAP phosphatase NrnA	nrnA
O34709	HTH-type transcriptional repressor OpcR	opcR
O34787	Polyketide biosynthesis protein PksE;Malonyl CoA-acyl carrier protein transacylase	pksE
O34877	Polyketide biosynthesis acyltransferase homolog PksD	pksD
O34932	Dephospho-CoA kinase	coaE
P00497	Amidophosphoribosyltransferase	purF
P08874	Transition state regulatory protein AbrB	abrB
P0CI73	Glutamine--fructose-6-phosphate aminotransferase [isomerizing]	glmS
P12049	Phosphoribosylformylglycinamidine synthase subunit PurS	purS
P13792	Alkaline phosphatase synthesis transcriptional regulatory protein PhoP	phoP
P14193	Ribose-phosphate pyrophosphokinase	prs
P18255	Threonine--tRNA ligase 1	thrS
P21341	Protease synthase and sporulation protein PAI 2	paiB
P23447	Flagellar M-ring protein	fliF
P23789	HTH-type transcriptional regulator Xre	xre
P24012	Cytochrome c oxidase subunit 3	ctaE
P25995	Dihydroorotase	pyrC
P26900-2;P26900	L-asparaginase 1	ansA
P27206	Surfactin synthase subunit 1	srfAA
P29726	Adenylosuccinate synthetase	purA
P31080	LexA repressor	lexA
P34957	Quinol oxidase subunit 2	qoxA
P35163	Transcriptional regulatory protein ResD	resD
P37502	Probable metallo-hydrolase YybB	yybB
P37551	Pur operon repressor	purR
P37563	tRNA(Ile)-lysidine synthase	tilS
P38049	Heme-degrading monooxygenase HmoB	hmoB
P39120	Citrate synthase 2	citZ
P39643	Probable aspartate aminotransferase	ywfG
P39789	Uncharacterized protein YpoC	ypoC
P40871	2,3-dihydroxybenzoate-AMP ligase	dhbE
P42435	Nitrite reductase [NAD(P)H]	nasD
P42958	Probable tartrate dehydrogenase/decarboxylase	ycsA
P46920	Glycine betaine transport ATP-binding protein OpuAA	opuAA
P50863	Protein mrp homolog SalA	salA
P52996	3-methyl-2-oxobutanoate hydroxymethyltransferase	panB
P54523	1-deoxy-D-xylulose-5-phosphate synthase	dxs
P70972	Energy-coupling factor transporter transmembrane protein EcfT	ecfT
P71007	Antilisterial bacteriocin subtilosin biosynthesis protein AlbE	albE
P80240	Transcription elongation factor GreA	greA
P94362	Putative membrane metalloprotease YxkI	yxkI
P94576	Uncharacterized protein YwoF	ywoF
P96499	Putative transcriptional regulator YvhJ	yvhJ
P96658	Uncharacterized protease YdeA	ydeA
P96676	Uncharacterized HTH-type transcriptional regulator YdeS	ydeS
Q04747	Surfactin synthase subunit 2	srfAB
Q04777	Alpha-acetolactate decarboxylase	alsD
Q05852	UTP--glucose-1-phosphate uridylyltransferase	gtaB
Q08432	Cystathionine beta-lyase PatB	patB
Q08787	Surfactin synthase subunit 3	srfAC
Q45494	Putative phosphatase YkrA	ykrA
Q59HN8	Response regulator aspartate phosphatase H	rapH
Q9JMQ2	Pyrophosphatase PpaX	ppaX
Q9KWZ1	Quinolinate synthase A	nadA

## Sheet: Proteins belonging to cluster 4
N = 830
UniProt IDs	Protein Name	Gene Name
C0H3P9	Uncharacterized protein YtzJ	ytzJ
C0H3Q1	Uncharacterized membrane protein YtzI	ytzI
C0H3Q6	Uncharacterized protein YbdZ	ybdZ
C0H3S6	Putative DNA-binding protein YwzG	ywzG
C0H3V2	Mannitol-specific phosphotransferase enzyme IIA component	mtlF
C0H3X4	Probable antitoxin YezG	yezG
C0SP78	Uncharacterized transporter YdfM	ydfM
C0SP85	Uncharacterized protein YukE	yukE
C0SP91	Putative metallo-hydrolase YycJ	yycJ
C0SP95	Copper transport protein YcnJ	ycnJ
C0SPA5	Probable formaldehyde dehydrogenase AdhA	adhA
C0SPB1	Uncharacterized protein YukJ	yukJ
C0SPC1	Putative phosphotransferase YtmP	ytmP
O05216	Uncharacterized transporter YwrB	ywrB
O05217	Uncharacterized HTH-type transcriptional regulator YwrC	ywrC
O05220	Uncharacterized protein YwrF	ywrF
O05236	Uncharacterized HTH-type transcriptional regulator YugG	yugG
O05239	Probable NADH-dependent butanol dehydrogenase 1	yugJ
O05243	UPF0047 protein YugU	yugU
O05251	Transcriptional regulatory protein MalR	malR
O05265	Uncharacterized oxidoreductase YulF	yulF
O05267	NADH dehydrogenase-like protein YumB	yumB
O05268	Ferredoxin--NADP reductase 2	yumC
O05392	Holliday junction ATP-dependent DNA helicase RuvA	ruvA
O05394	Cystathionine gamma-lyase	mccB
O05406	Uncharacterized membrane protein YrhP	yrhP
O05411	Uncharacterized protein YrpD	yrpD
O05412	Glutamate racemase 2	yrpC
O05413	Probable nitronate monooxygenase	yrpB
O05494	Uncharacterized HTH-type transcriptional regulator YdhC	ydhC
O05496	Uncharacterized UDP-glucosyltransferase YdhE	ydhE
O05515	tRNA threonylcarbamoyladenosine biosynthesis protein TsaE	tsaE
O05517	Putative ribosomal-protein-alanine acetyltransferase	rimI
O05523	Sec-independent protein translocase protein TatCy	tatC2
O06006	Putative cysteine protease YraA	yraA
O06474	HTH-type transcriptional regulator YfmP	yfmP
O06475	Uncharacterized protein YfmQ	yfmQ
O06477	Putative sensory transducer protein YfmS	yfmS
O06724	Uncharacterized protein YisK	yisK
O06744	Uncharacterized N-acetyltransferase YitI	yitI
O06965	Putative lipoprotein YvcA	yvcA
O06973	Nucleotide-binding protein YvcJ	yvcJ
O06974	Gluconeogenesis factor	mgfK
O06975	Putative sporulation transcription regulator WhiA	whiA
O06976	HPr-like protein Crh	crh
O06980	Uncharacterized ABC transporter ATP-binding protein YvcR	yvcR
O07001	Uncharacterized HTH-type transcriptional regulator YvdT	yvdT
O07006	Phenolic acid decarboxylase PadC	padC
O07007	HTH-type transcriptional regulator LutR	lutR
O07008	HTH-type transcriptional regulator GanR	ganR
O07015	Sigma factor SigB regulation protein RsbQ	rsbQ
O07019	Uncharacterized transcriptional regulatory protein YvfU	yvfU
O07020	Lactate utilization protein A	lutA
O07079	Uncharacterized protein YrdA	yrdA
O07081	Uncharacterized isochorismatase family protein YrdC	yrdC
O07084	Cadmium, cobalt and zinc/H(+)-K(+) antiporter	czcD
O07513	Protein hit	hit
O07516	Uncharacterized membrane protein YhaH	yhaH
O07522	Uncharacterized metallophosphoesterase YhaO	yhaO
O07532	Peptidoglycan endopeptidase LytF	lytF
O07533	Putative enoyl-CoA hydratase/isomerase YhaR	yhaR
O07541	Uncharacterized protein YhaZ	yhaZ
O07548	Uncharacterized protein YheG	yheG
O07549	Probable multidrug resistance ABC transporter ATP-binding/permease protein YheH	yheH
O07561	Uncharacterized aromatic compound monooxygenase YhjG	yhjG
O07564	Glucose-6-phosphate 3-dehydrogenase	ntdC
O07565	Kanosamine-6-phosphate phosphatase	ntdB
O07566	3-oxo-glucose-6-phosphate:glutamate aminotransferase	ntdA
O07597	D-alanine aminotransferase	dat
O07598	Putative amidohydrolase YhaA	yhaA
O07600	3-oxoacyl-[acyl-carrier-protein] synthase 3 protein 2	fabHB
O07603	Putative aminopeptidase YhfE	yhfE
O07604	Uncharacterized protein YhfF	yhfF
O07607	Probable metallo-hydrolase YhfI	yhfI
O07609	Uncharacterized sugar epimerase YhfK	yhfK
O07610	Long-chain-fatty-acid--CoA ligase	lcfB
O07617	Uncharacterized phosphatase PhoE	phoE
O07624	Uncharacterized beta-barrel protein YwiB	ywiB
O07918	Uncharacterized protein YraH	yraH
O07921	Chitosanase	csn
O07934	Uncharacterized protein YraJ	yraJ
O07937	Uncharacterized hydrolase YraK	yraK
O07939	Uncharacterized protein YisT	yisT
O08335	HTH-type transcriptional repressor BscR	bscR
O30509	Aspartyl/glutamyl-tRNA(Asn/Gln) amidotransferase subunit B	gatB
O31414	UPF0213 protein YazA	yazA
O31418	Mini-ribonuclease 3	mrnC
O31423	Uncharacterized protein SkfB	skfB
O31427	SkfA peptide export ATP-binding protein SkfE	skfE
O31443	Putative HTH-type DNA-binding domain-containing acetyltransferase YbfA	ybfA
O31449	Uncharacterized HTH-type transcriptional regulator YbfI	ybfI
O31456	Uncharacterized HTH-type transcriptional regulator YbfP	ybfP
O31459	Uncharacterized HTH-type transcriptional regulator YbgA	ybgA
O31488	Uncharacterized protein YdaN	ydaN
O31504	Putative DNA methyltransferase YeeA	yeeA
O31511	Uncharacterized protein YesE	yesE
O31513	Uncharacterized N-acetyltransferase YesJ	yesJ
O31535	Uncharacterized protein YetH	yetH
O31539	Uncharacterized protein YetJ	yetJ
O31546	Probable tRNA-dihydrouridine synthase 2	dus2
O31556	Uncharacterized protein YfjC	yfjC
O31557	Uncharacterized protein YfjB	yfjB
O31571	Putative NAD(P)H nitroreductase YfhC	yfhC
O31575	Regulatory protein RecX	recX
O31580	Uncharacterized protein YfhL	yfhL
O31601	Putative acetyltransferase YjbC	yjbC
O31602	Regulatory protein Spx	spxA
O31605	Oligoendopeptidase F homolog	yjbG
O31610	UPF0738 protein YjbL	yjbL
O31611	GTP pyrophosphokinase YjbM	yjbM
O31617	Sulfur carrier protein ThiS	thiS
O31626	Putative ATP-dependent DNA helicase YjcD	yjcD
O31630	Uncharacterized protein YjcH	yjcH
O31631	Cystathionine gamma-synthase/O-acetylhomoserine (thiol)-lyase	metI
O31635	Uncharacterized protein YjcM	yjcM
O31641	Uncharacterized protein YjcS	yjcS
O31643	Uncharacterized protein YjdB	yjdB
O31650	Putative Cys-tRNA(Pro)/Cys-tRNA(Cys) deacylase YjdI	yjdI
O31654	RNA polymerase sigma factor SigI	sigI
O31656	Uncharacterized protein YkrK	ykrK
O31664	Hydrolase MtnU	mtnU
O31666	2,3-diketo-5-methylthiopentyl-1-phosphate enolase	mtnW
O31668	Methylthioribulose-1-phosphate dehydratase	mtnB
O31673	ATP-dependent Clp protease ATP-binding subunit ClpE	clpE
O31677	7-carboxy-7-deazaguanine synthase	queE
O31684	Uncharacterized protein YkvS	ykvS
O31689	Putative dipeptidase YkvY	ykvY
O31690	Uncharacterized HTH-type transcriptional regulator YkvZ	ykvZ
O31691	PtsGHI operon antiterminator	glcT
O31699	Thiol-disulfide oxidoreductase YkuV	ykuV
O31705	Molybdopterin synthase catalytic subunit	moaE
O31714	1-phosphofructokinase	fruK
O31718	UPF0356 protein YkzG	ykzG
O31726	Laccase domain protein YlmD	ylmD
O31742	50S ribosomal protein L19	rplS
O31760	Ribonuclease J2	rnjB
O31764	Probable inactive metalloprotease YmfF	ymfF
O31766	Uncharacterized zinc protease YmfH	ymfH
O31776	L-threonine 3-dehydrogenase	tdh
O31779	Uncharacterized protein YmcA	ymcA
O31782	Polyketide synthase PksN	pksN
O31785	Polyketide biosynthesis cytochrome P450 PksS	pksS
O31790	Uncharacterized protein YmaD	ymaD
O31801	Probable deoxyuridine 5-triphosphate nucleotidohydrolase YncF	yncF
O31803	Uncharacterized protein YncM	yncM
O31804	Sec-independent protein translocase protein TatAc	tatAc
O31822	Probable UTP--glucose-1-phosphate uridylyltransferase YngB	yngB
O31844	HTH-type transcriptional repressor CzrA	czrA
O31845	Uncharacterized membrane protein YozB	yozB
O31848	Uncharacterized protein YozC	yozC
O31853	Uncharacterized UDP-glucosyltransferase YojK	yojK
O31857	Probable N-acetyl-alpha-D-glucosaminyl L-malate deacetylase 2	bshB2
O31858	Uncharacterized protein YojF	yojF
O31911	SPBc2 prophage-derived uncharacterized protein YorB	yorB
O31937	SPBc2 prophage-derived uncharacterized protein YopA	yopA
O31949	SPBc2 prophage-derived uncharacterized protein YonI	yonI
O31953	SPBc2 prophage-derived uncharacterized protein YonE	yonE
O31995	SPBc2 prophage-derived uncharacterized N-acetyltransferase YokL	yokL
O32002	SPBc2 prophage-derived uncharacterized protein YokE	yokE
O32003	SPBc2 prophage-derived aminoglycoside N(3)-acetyltransferase-like protein YokD	yokD
O32006	Resolvase homolog YokA	yokA
O32022	Uncharacterized protein YqzD	yqzD
O32036	Putative O-methyltransferase YrrM	yrrM
O32037	tRNA threonylcarbamoyladenosine dehydratase	tcdA
O32041	Putative N-acetylmuramoyl-L-alanine amidase YrvJ	yrvJ
O32052	UPF0092 membrane protein YrbF	yrbF
O32053	Queuine tRNA-ribosyltransferase	tgt
O32065	Uncharacterized protein YtzB	ytzB
O32068	Uncharacterized RNA pseudouridine synthase YtzG	ytzG
O32072	Uncharacterized protein YtwF	ytwF
O32078	Uncharacterized protein YuaE	yuaE
O32087	Uncharacterized membrane protein YuzA	yuzA
O32091	Uncharacterized isochorismatase family protein PncA	pncA
O32093	Uncharacterized protein YueH	yueH
O32095	UPF0118 membrane protein YueF	yueF
O32106	Probable cytosol aminopeptidase	pepA
O32107	Uncharacterized membrane protein YuiD	yuiD
O32113	Uncharacterized protein SufA	sufA
O32125	Uncharacterized hydrolase YutF	yutF
O32126	UPF0331 protein YutE	yutE
O32127	Uncharacterized protein YutD	yutD
O32135	UPF0759 protein YunF	yunF
O32140	Uric acid permease PucK	pucK
O32158	Uncharacterized protein YurQ	yurQ
O32161	Uncharacterized protein YurT	yurT
O32164	Cysteine desulfurase SufS	sufS
O32167	Methionine-binding lipoprotein MetQ	metQ
O32168	Methionine import system permease protein MetP	metP
O32174	Glycine cleavage system H protein	gcvH
O32175	Uncharacterized protein YusI	yusI
O32178	Probable 3-hydroxyacyl-CoA dehydrogenase	fadN
O32182	Uncharacterized MFS-type transporter YusP	yusP
O32193	Sensor histidine kinase CssS	cssS
O32207	Uncharacterized protein YvgK	yvgK
O32208	Putative ABC transporter substrate-binding lipoprotein YvgL	yvgL
O32210	Glyoxal reductase	yvgN
O32214	Sulfite reductase [NADPH] flavoprotein alpha-component	cysJ
O32218	Disulfide bond formation protein D	bdbD
O32224	FMN-dependent NADH-azoreductase 2	azoR2
O32229	Uncharacterized oxidoreductase YvaG	yvaG
O32236	HTH-type transcriptional repressor RghR	rghR
O32241	Immunity protein SdpI	sdpI
O32248	Uncharacterized N-acetyltransferase YvbK	yvbK
O32258	Uncharacterized glycosylase YvbX	yvbX
O32266	Swarming motility protein SwrAA	swrAA
O32274	Putative undecaprenyl-phosphate N-acetylgalactosaminyl 1-phosphate transferase	tuaA
O34305	Uncharacterized protein YtoQ	ytoQ
O34307	Uncharacterized MFS-type transporter YvmA	yvmA
O34313	Trifunctional nucleotide phosphoesterase protein YfkN;2,3-cyclic-nucleotide 2-phosphodiesterase/3-nucleotidase;5-nucleotidase	yfkN
O34318	Uncharacterized protein YloU	yloU
O34320	Uncharacterized protein FadG	fadG
O34324	Dihydrolipoyl dehydrogenase	acoL
O34325	Uncharacterized protein YtrP	ytrP
O34327	Response regulator aspartate phosphatase J	rapJ
O34328	Guanylate kinase	gmk
O34334	Uncharacterized protein YjoA	yjoA
O34340	3-oxoacyl-[acyl-carrier-protein] synthase 2	fabF
O34351	Cyclo(L-leucyl-L-leucyl) synthase	yvmC
O34355	Putative amidohydrolase YtcJ	ytcJ
O34365	Uncharacterized protein YtmB	ytmB
O34366	Putative flagellin YvzB	yvzB
O34374	Putative cytochrome P450 YjiB	yjiB
O34377	Uncharacterized protein YobM	yobM
O34403	Formamidopyrimidine-DNA glycosylase	mutM
O34412	Regulatory protein YlbF	ylbF
O34428	Uncharacterized protein YjlA	yjlA
O34433	Putative phage-related protein YobO	yobO
O34436	Probable low-affinity inorganic phosphate transporter	pit
O34441	UPF0701 protein YloC	yloC
O34454	UPF0111 protein YkaA	ykaA
O34457	Molybdenum cofactor biosynthesis protein B	moaB
O34470	Uncharacterized protein YlbL	ylbL
O34475	Putative NAD(P)H nitroreductase YfkO	yfkO
O34499	6-phosphogluconolactonase	pgl
O34527	HTH-type transcriptional regulator CymR	cymR
O34530	Putative ribosome biogenesis GTPase RsgA	rsgA
O34538	Uncharacterized lipoprotein YcdA	ycdA
O34539	Uncharacterized UDP-glucosyltransferase YjiC	yjiC
O34542	Uncharacterized protein YflK	yflK
O34543	Putative ring-cleaving dioxygenase MhqE	mhqE
O34553	Protein YtsP	ytsP
O34564	Thioredoxin-like protein YkuU	ykuU
O34569	Uncharacterized N-acetyltransferase YoaA	yoaA
O34577	Probable adenylyl-sulfate kinase	cysC
O34592	AB hydrolase superfamily protein YdjP	ydjP
O34596	Antitoxin YobK	yobK
O34621	Uncharacterized protein YcdB	ycdB
O34623	DNA polymerase III subunit alpha	dnaE
O34634	Putative Holliday junction resolvase	yrrK
O34635	Probable L-serine dehydratase, beta chain	sdaAB
O34640	Uncharacterized protein YerI	yerI
O34643	Uncharacterized HTH-type transcriptional regulator YvkB	yvkB
O34660	Putative aldehyde dehydrogenase DhaS	dhaS
O34669	Cell wall-binding protein YocH	yocH
O34689	Putative ring-cleaving dioxygenase MhqA	mhqA
O34693	Uncharacterized protein YloA	yloA
O34696	Uncharacterized transferase YtoA	ytoA
O34697	Bacitracin export ATP-binding protein BceA	bceA
O34707	Tetraprenyl-beta-curcumene synthase	ytpB
O34714	Oxalate decarboxylase OxdC	oxdC
O34726	Putative malate transporter YflS	yflS
O34743	Uncharacterized protein YlbA	ylbA
O34751	Uncharacterized protein YloV	yloV
O34753	Probable undecaprenyl-phosphate N-acetylglucosaminyl 1-phosphate transferase	tagO
O34760	Probable quorum-quenching lactonase YtnP	ytnP
O34764	Sulfate adenylyltransferase	sat
O34777	Organic hydroperoxide resistance transcriptional regulator	ohrR
O34782	Uncharacterized oxidoreductase YvrD	yvrD
O34788	(R,R)-butanediol dehydrogenase	bdhA
O34792	UPF0750 membrane protein YvjA	yvjA
O34796	Uncharacterized phosphotransferase YvkC	yvkC
O34798	Peptidoglycan-N-acetylmuramic acid deacetylase PdaC	pdaC
O34812	Putative NADP-dependent oxidoreductase YfmJ	yfmJ
O34813	Precorrin-2 dehydrogenase	sirC
O34815	Putative 2-hydroxyacid dehydrogenase YoaD	yoaD
O34817	HTH-type transcriptional repressor YvoA	yvoA
O34828	UPF0473 protein YrzB	yrzB
O34841	Uncharacterized protein YoeB	yoeB
O34842	Putative hydrolase MhqD	mhqD
O34844	HTH-type transcriptional regulator YodB	yodB
O34857	Repressor rok	rok
O34858	Argininosuccinate lyase	argH
O34866	Putative carboxypeptidase YodJ	yodJ
O34872	Putative carbonic anhydrase YtiB	ytiB
O34894	Septation ring formation regulator EzrA	ezrA
O34897	Uncharacterized MscS family protein YkuT	ykuT
O34899	Cob(I)yrinic acid a,c-diamide adenosyltransferase	yvqK
O34909	Putative adenine deaminase YerA	yerA
O34924	Putative aminopeptidase YtoP	ytoP
O34925	Purine nucleoside phosphorylase DeoD-type	deoD
O34926	Pulcherriminic acid synthase	cypX
O34943	Putative tRNA-binding protein YtpR	ytpR
O34944	Putative dipeptidase YtjP	ytjP
O34960	Uncharacterized protein YjgB	yjgB
O34962	Probable NAD-dependent malic enzyme 4	ytsJ
O34967	50S ribosomal protein L31 type B	rpmE2
O34969	Uncharacterized oxidoreductase YfjR	yfjR
O34987	Guanine/hypoxanthine permease PbuG	pbuG
O34989	Sensor histidine kinase YvrG	yvrG
O35000	Glucosamine-6-phosphate deaminase 1	nagB
O35008	Putative protein YtqA	ytqA
O35011	DNA-directed RNA polymerase subunit omega	rpoZ
O35017	Uncharacterized zinc-type alcohol dehydrogenase-like protein YogA	yogA
O35031	Acylphosphatase	acyP
O35043	Uncharacterized MscS family protein YfkC	yfkC
P02968	Flagellin	hag
P04990	Threonine synthase	thrC
P05306	PTS system sucrose-specific EIIBC component;Sucrose-specific phosphotransferase enzyme IIB component;Sucrose permease IIC component	sacP
P05645	3-isopropylmalate dehydrogenase	leuB
P05650	Uncharacterized protein YaaA	yaaA
P05651	DNA replication and repair protein RecF	recF
P05654	Aspartate carbamoyltransferase	pyrB
P05655	Levansucrase	sacB
P05657	50S ribosomal protein L27	rpmA
P06628	Sporulation initiation phosphotransferase F	spo0F
P07343	Fumarate hydratase class II	fumC
P07372	Stage II sporulation protein D	spoIID
P07860	RNA polymerase sigma-F factor	sigF
P07908	Replication initiation and membrane attachment protein	dnaB
P08164	NH(3)-dependent NAD(+) synthetase	nadE
P08821	DNA-binding protein HU 1	hupA
P08838	Phosphoenolpyruvate-protein phosphotransferase	ptsI
P08877	Phosphocarrier protein HPr	ptsH
P09339	Aconitate hydratase A	citB
P0CI74	Cell cycle protein GpsB	gpsB
P0CI75	Bifunctional ligase/repressor BirA	birA
P0CI76	Replication termination protein	rtp
P0CI78	50S ribosomal protein L24	rplX
P10727	Anti-sigma F factor antagonist	spoIIAA
P10728	Anti-sigma F factor	spoIIAB
P10943	Hut operon positive regulatory protein	hutP
P11018	Major intracellular serine protease	isp
P11469	Uncharacterized protein YsmA	ysmA
P11998	6,7-dimethyl-8-ribityllumazine synthase	ribH
P12040	Phosphoribosylglycinamide formyltransferase	purN
P12425	Glutamine synthetase	glnA
P12464	DNA-directed RNA polymerase subunit delta	rpoE
P12946	Heme A synthase	ctaA
P13243	Probable fructose-bisphosphate aldolase	fbaA
P13800	Transcriptional regulatory protein DegU	degU
P14192	Bifunctional protein GlmU;UDP-N-acetylglucosamine pyrophosphorylase;Glucosamine-1-phosphate N-acetyltransferase	glmU
P14203	Uncharacterized protein YuxH	yuxH
P14577	50S ribosomal protein L16	rplP
P14949	Thioredoxin	trxA
P14951	UvrABC system protein C	uvrC
P16397	Bacillopeptidase F	bpr
P16440	Riboflavin synthase	ribE
P16616	Porphobilinogen deaminase	hemC
P17585	Aminoglycoside 6-adenylyltransferase	aadK
P17618	Riboflavin biosynthesis protein RibD;Diaminohydroxyphosphoribosylaminopyrimidine deaminase;5-amino-6-(5-phosphoribosylamino)uracil reductase	ribD
P17622	Protein RibT	ribT
P17889	Translation initiation factor IF-2	infB
P17906	Phosphoserine phosphatase RsbX	rsbX
P18186	Ornithine carbamoyltransferase	argF
P18429	Endo-1,4-beta-xylanase A	xynA
P19079	Cytidine deaminase	cdd
P19080	Chorismate mutase AroH	aroH
P19465	GTP cyclohydrolase 1	folE
P19669	Transaldolase	tal
P19946	50S ribosomal protein L15	rplO
P19994	Methionine aminopeptidase 1	map
P20166	PTS system glucose-specific EIICBA component;Glucose permease IIC component;Glucose-specific phosphotransferase enzyme IIB component;Glucose-specific phosphotransferase enzyme IIA component	ptsG
P20277	50S ribosomal protein L17	rplQ
P20458	Translation initiation factor IF-1	infA
P20668	HTH-type transcriptional regulator GltC	gltC
P21204	UPF0735 ACT domain-containing protein YszB	yszB
P21335	tRNA-specific adenosine deaminase	tadA
P21340	Protease synthase and sporulation negative regulatory protein PAI 1	paiA
P21473	30S ribosomal protein S15	rpsO
P21474	30S ribosomal protein S16	rpsP
P21476	30S ribosomal protein S19	rpsS
P21478	30S ribosomal protein S21	rpsU
P21879	Inosine-5-monophosphate dehydrogenase	guaB
P21882	Pyruvate dehydrogenase E1 component subunit beta	pdhB
P21884	Uncharacterized lipoprotein YkyA	ykyA
P22250	Glutamate--tRNA ligase	gltX
P22326	Tyrosine--tRNA ligase 1	tyrS1
P23448	Flagellar motor switch protein FliG	fliG
P23449	Probable flagellar assembly protein FliH	fliH
P23452	Flagellar protein FliL	fliL
P23453	Flagellar motor switch protein FliM	fliM
P23966	1,4-dihydroxy-2-naphthoyl-CoA synthase	menB
P23970	2-succinyl-5-enolpyruvyl-6-hydroxy-3-cyclohexene-1-carboxylate synthase	menD
P24010	Cytochrome c oxidase subunit 1	ctaD
P24013	Cytochrome c oxidase subunit 4B	ctaF
P24073	Flagellar motor switch phosphatase FliY	fliY
P24137	Oligopeptide transport ATP-binding protein OppF	oppF
P24281	Nucleoid-associated protein YaaK	yaaK
P24469	Cytochrome c-550	cccA
P24500	Flagellar basal body rod protein FlgB	flgB
P24809	Uncharacterized protein YqxJ	yqxJ
P24812	Uncharacterized protein YqxI	yqxI
P25152	Aminopeptidase YwaD	ywaD
P26901	Vegetative catalase	katA
P26907	Glucose starvation-inducible protein B	gsiB
P27620	Putative N-acetylmannosaminyltransferase	tagA
P27876	Triosephosphate isomerase	tpiA
P28015	Putative septation protein SpoVG	spoVG
P28368	Putative sigma-54 modulation protein	yvyD
P28598	60 kDa chaperonin	groL
P28599	10 kDa chaperonin	groS
P28612	Motility protein B	motB
P28618	Pyrrolidone-carboxylate peptidase	pcp
P28619	Ribonuclease PH	rph
P28819	Aminodeoxychorismate/anthranilate synthase component 2	pabA
P29141	Minor extracellular protease vpr	vpr
P30300	Glycerol uptake operon antiterminator regulatory protein	glpP
P30950	Delta-aminolevulinic acid dehydratase	hemB
P31103	Nucleoside diphosphate kinase	ndk
P31113	Demethylmenaquinone methyltransferase	menG
P31847	Uncharacterized protein YpuA	ypuA
P32081	Cold shock protein CspB	cspB
P32395	Uroporphyrinogen decarboxylase	hemE
P32396	Ferrochelatase	hemH
P32728	Uncharacterized protein YlxR	ylxR
P33166	Elongation factor Tu	tuf
P34956	Quinol oxidase subunit 1	qoxB
P34958	Quinol oxidase subunit 3	qoxC
P35137	Peptidyl-prolyl cis-trans isomerase B	ppiB
P35155	Segregation and condensation protein B	scpB
P35160	Thiol-disulfide oxidoreductase ResA	resA
P35161	Cytochrome c biogenesis protein ResB	resB
P35162	Cytochrome c biogenesis protein ResC	resC
P35164	Sensor histidine kinase ResE	resE
P35620	Flagellar biosynthesis protein FlhA	flhA
P36843	Arginine biosynthesis bifunctional protein ArgJ;Glutamate N-acetyltransferase;Amino-acid acetyltransferase;Arginine biosynthesis bifunctional protein ArgJ alpha chain;Arginine biosynthesis bifunctional protein ArgJ beta chain	argJ
P37253	Ketol-acid reductoisomerase	ilvC
P37437	50S ribosomal protein L9	rplI
P37466	Protein Veg	veg
P37470	Peptidyl-tRNA hydrolase	spoVC
P37472	Hypoxanthine-guanine phosphoribosyltransferase	hprT
P37487	Manganese-dependent inorganic pyrophosphatase	ppaC
P37504	Uncharacterized protein YyaT	yyaT
P37517	Catabolite control protein B	ccpB
P37522	Sporulation initiation inhibitor protein Soj	soj
P37523	Uncharacterized protein YyaB	yyaB
P37525	Uncharacterized protein YaaB	yaaB
P37527	Pyridoxal 5-phosphate synthase subunit PdxS	pdxS
P37528	Pyridoxal 5-phosphate synthase subunit PdxT	pdxT
P37536	Uncharacterized protein YaaO	yaaO
P37539	Uncharacterized protein YaaR	yaaR
P37544	Ribosomal RNA small subunit methyltransferase I	rsmI
P37545	Uncharacterized deoxyribonuclease YabD	yabD
P37556	Uncharacterized protein YabN	yabN
P37566	Putative peptidyl-prolyl cis-trans isomerase YacD	yacD
P37568	Transcriptional regulator CtsR	ctsR
P37569	Protein-arginine kinase activator protein	mcsA
P37599	Chemotaxis protein CheV	cheV
P37808	ATP synthase subunit alpha	atpA
P37809	ATP synthase subunit beta	atpD
P37810	ATP synthase gamma chain	atpG
P37811	ATP synthase subunit delta	atpH
P37812	ATP synthase epsilon chain	atpC
P37813	ATP synthase subunit a	atpB
P37869	Enolase	eno
P37874	Uncharacterized protein YgxB	ygxB
P37887	Cysteine synthase	cysK
P37940	2-oxoisovalerate dehydrogenase subunit alpha	bfmBAA
P37958	Adapter protein MecA 1	mecA
P37959	Uncharacterized oxidoreductase YusZ	yusZ
P37960	Metalloregulation DNA-binding stress protein	mrgA
P37965	Glycerophosphoryl diester phosphodiesterase	glpQ
P38021	Ornithine aminotransferase	rocD
P38423	Uncharacterized protein YqxK	yqxK
P38424	Probable GTP-binding protein EngB	engB
P38494	30S ribosomal protein S1 homolog	ypfD
P39066	Acetoin utilization protein AcuB	acuB
P39070	ATP-dependent protease subunit ClpQ	clpQ
P39119	Citrate synthase 1	citA
P39121	Deoxyribose-phosphate aldolase	deoC
P39126	Isocitrate dehydrogenase [NADP]	icd
P39127	HTH-type transcriptional regulator CitR	citR
P39132	Uncharacterized protein YhbE	yhbE
P39138	Arginase	rocF
P39140	Deoxyribonucleoside regulator	deoR
P39141	Pyrimidine nucleoside transport protein	nupC
P39148	Serine hydroxymethyltransferase	glyA
P39156	Putative sugar phosphate isomerase YwlF	ywlF
P39580	Protein DltB	dltB
P39583	GTP pyrophosphokinase YwaC	ywaC
P39586	Uncharacterized protein YwbC	ywbC
P39594	Thiamine-phosphate synthase	thiE
P39598	Uncharacterized protein YwbO	ywbO
P39604	Rod shape-determining protein RodA	rodA
P39614	Uncharacterized glycosyltransferase YwdF	ywdF
P39615	Uracil-DNA glycosylase	ung
P39634	1-pyrroline-5-carboxylate dehydrogenase	rocA
P39635	Protein RocB	rocB
P39636	Amino-acid permease RocC	rocC
P39639	Bacilysin biosynthesis protein BacB	bacB
P39640	Bacilysin biosynthesis oxidoreductase BacC	bacC
P39642	Putative bacilysin exporter BacE	bacE
P39645	Putative heme-dependent peroxidase YwfI	ywfI
P39646	Phosphate acetyltransferase	pta
P39666	Probable nicotinate-nucleotide pyrophosphorylase [carboxylating]	nadC
P39738	Flagellar hook-associated protein 2	fliD
P39739	Flagellar protein FliS	fliS
P39758	Putative transition state regulator Abh	abh
P39759	Putative gamma-glutamylcyclotransferase YkqA	ykqA
P39762	Aminopeptidase AmpS	ampS
P39772	Asparagine--tRNA ligase	asnS
P39776	Tyrosine recombinase XerC	xerC
P39778	ATP-dependent protease ATPase subunit ClpY	clpY
P39779	GTP-sensing transcriptional pleiotropic repressor CodY	codY
P39788	Endonuclease III	nth
P39796	Trehalose operon transcriptional repressor	treR
P39800	N-acetylmuramoyl-L-alanine amidase XlyA	xlyA
P39804	Intracellular proteinase inhibitor	ipi
P39809	Negative regulator of flagellin synthesis	flgM
P39815	Methylenetetrahydrofolate--tRNA-(uracil-5-)-methyltransferase TrmFO	trmFO
P39824	Beta-lactamase	penP
P39839	Uncharacterized peptidase YuxL	yuxL
P39840	Aldose 1-epimerase	galM
P39844	D-alanyl-D-alanine carboxypeptidase DacC	dacC
P39847	Plipastatin synthase subunit C;ATP-dependent glutamate adenylase 2;ATP-dependent alanine/valine adenylase	ppsC
P39848	Beta-N-acetylglucosaminidase	lytD
P39911	Uncharacterized protein YphF	yphF
P39912	Protein AroA(G);Phospho-2-dehydro-3-deoxyheptonate aldolase;Chorismate mutase	aroA
P39914	Uncharacterized protein YtxJ	ytxJ
P40398	Uncharacterized oxidoreductase YhxD	yhxD
P40409	Iron-uptake system-binding protein	feuA
P40737	Antitoxin YxxD	yxxD
P40740	Aryl-phospho-beta-D-glucosidase BglH	bglH
P40759	Transcriptional regulatory protein GlnL	glnL
P40761	Uncharacterized protein YuxK	yuxK
P40762	Uncharacterized HTH-type transcriptional regulator YvmB	yvmB
P40767	Peptidoglycan DL-endopeptidase CwlO	cwlO
P40768	Uncharacterized protein YtkA	ytkA
P40769	Uncharacterized metalloprotease YhfN	yhfN
P40779	UPF0478 protein YtxG	ytxG
P40780	Uncharacterized protein YtxH	ytxH
P40802	Putative polyketide biosynthesis enoyl-CoA isomerase PksI	pksI
P40806	Polyketide synthase PksJ	pksJ
P40830	Polyketide biosynthesis 3-hydroxy-3-methylglutaryl-ACP synthase PksG	pksG
P42060	50S ribosomal protein L22	rplV
P42068	Formimidoylglutamase	hutG
P42084	Imidazolonepropionase	hutI
P42095	DNA repair protein RecO	recO
P42103	Uncharacterized HTH-type transcriptional regulator YxaD	yxaD
P42105	Uncharacterized HTH-type transcriptional regulator YxaF	yxaF
P42111	Uncharacterized protein YxaL	yxaL
P42113	Asparagine synthetase [glutamine-hydrolyzing] 2	asnH
P42200	L-cystine transport system permease protein TcyB	tcyB
P42234	Catalase-2	katE
P42294	Uncharacterized protein YxiB	yxiB
P42297	Universal stress protein YxiE	yxiE
P42312	Purine nucleoside transport protein NupG	nupG
P42318	Uncharacterized protein YxjG	yxjG
P42405	3-hexulose-6-phosphate synthase	hxlA
P42416	Inosose dehydratase	iolE
P42433	Assimilatory nitrate reductase electron transfer subunit	nasB
P42436	Assimilatory nitrite reductase [NAD(P)H] small subunit	nasE
P42919	50S ribosomal protein L2	rplB
P42920	50S ribosomal protein L3	rplC
P42923	50S ribosomal protein L10	rplJ
P42924	50S ribosomal protein L23	rplW
P42953	Teichoic acid translocation permease protein TagG	tagG
P42955	Uncharacterized protein YslB	yslB
P42957	Mannitol-1-phosphate 5-dehydrogenase	mtlD
P42961	Uncharacterized protein YcsD	ycsD
P42962	Putative phosphatase YcsE	ycsE
P42968	HTH-type transcriptional regulator KipR	kipR
P42973	Aryl-phospho-beta-D-glucosidase BglA	bglA
P42974	NADH dehydrogenase	ahpF
P42980	Methylglyoxal synthase	mgsA
P42981	N-acetyl-alpha-D-glucosaminyl L-malate deacetylase 1	bshB1
P45694	Transketolase	tkt
P45710	Protein CcdC	ccdC
P45743	Isochorismatase	dhbB
P45744	Isochorismate synthase DhbC	dhbC
P45862	Uncharacterized protein YwjB	ywjB
P45868	Probable NAD-dependent malic enzyme 2	maeA
P45871	Uncharacterized protein YwkD	ywkD
P45873	Release factor glutamine methyltransferase	prmC
P45874	Uncharacterized protein YwkF	ywkF
P45913	Uncharacterized protein YqaP	yqaP
P45919	Uncharacterized protein YqbC	yqbC
P46320	Probable 6-phospho-beta-glucosidase	licH
P46321	Probable licABCH operon regulator;Putative phosphotransferase enzyme IIB component;Putative phosphotransferase enzyme IIA component	licR
P46322	CDP-diacylglycerol--glycerol-3-phosphate 3-phosphatidyltransferase	pgsA
P46336	Protein IolS	iolS
P46337	HTH-type transcriptional regulator IolR	iolR
P46340	Probable ABC transporter permease protein YqgI	yqgI
P46344	Uncharacterized protein YqfF	yqfF
P46347	Endoribonuclease YbeY	ybeY
P46352	Tyrosine recombinase XerD	xerD
P46353	Phosphopentomutase	drm
P46354	Purine nucleoside phosphorylase 1	punA
P46898	50S ribosomal protein L6	rplF
P46905	Uncharacterized oxidoreductase YccK	yccK
P46906	Arginine--tRNA ligase	argS
P46911	Menaquinol-cytochrome c reductase iron-sulfur subunit	qcrA
P46913	Menaquinol-cytochrome c reductase cytochrome b/c subunit	qcrC
P46917	Minor teichoic acid biosynthesis protein GgaA	ggaA
P49785	Stage III sporulation protein AH	spoIIIAH
P49814	Malate dehydrogenase	mdh
P49852	Flavohemoprotein	hmp
P49938	Iron(3+)-hydroxamate import ATP-binding protein FhuC	fhuC
P50619	Uncharacterized protein YmaB	ymaB
P50621	Ribonucleoside-diphosphate reductase subunit beta	nrdF
P50727	Ferredoxin	fer
P50729	Probable ATP-dependent DNA helicase RecS	recS
P50733	Uncharacterized protein YpbG	ypbG
P50829	Putative phosphotransferase enzyme IIA component YpqE	ypqE
P50833	Uncharacterized protein YppE	yppE
P50843	4-deoxy-L-threo-5-hexosulose-uronate ketol-isomerase	kduI
P50846	KHG/KDPG aldolase;4-hydroxy-2-oxoglutarate aldolase;2-dehydro-3-deoxy-phosphogluconate aldolase	kdgA
P50848	Carboxypeptidase 1	ypwA
P51777	Cold shock protein CspD	cspD
P51831	3-oxoacyl-[acyl-carrier-protein] reductase FabG	fabG
P52999	Aspartate 1-decarboxylase;Aspartate 1-decarboxylase beta chain;Aspartate 1-decarboxylase alpha chain	panD
P53555	L-Lysine--8-amino-7-oxononanoate transaminase	bioK
P54154	Peptide methionine sulfoxide reductase MsrA	msrA
P54155	Peptide methionine sulfoxide reductase MsrB	msrB
P54162	14.7 kDa ribonuclease H-like protein	rnhA
P54168	Uncharacterized protein YpgQ	ypgQ
P54178	SCO1 protein homolog	ypmQ
P54182	Uncharacterized HTH-type transcriptional regulator YpoP	ypoP
P54327	Phage-like element PBSX protein XkdG	xkdG
P54331	Phage-like element PBSX protein XkdK	xkdK
P54375	Superoxide dismutase [Mn]	sodA
P54391	Uncharacterized protein YpiF	ypiF
P54396	Uncharacterized protein YpmB	ypmB
P54418	Phosphoenolpyruvate carboxykinase [ATP]	pckA
P54422	Gamma-glutamyltranspeptidase;Gamma-glutamyltranspeptidase large chain;Gamma-glutamyltranspeptidase small chain	ggt
P54423	Cell wall-associated protease;Cell wall-associated polypeptide CWBP23;Cell wall-associated polypeptide CWBP52	wprA
P54425	Uncharacterized transporter YbxG	ybxG
P54431	Uncharacterized protein YrkD	yrkD
P54439	Uncharacterized NAD(P)H oxidoreductase YrkL	yrkL
P54452	Uncharacterized protein YqeG	yqeG
P54454	Probable RNA-binding protein YqeI	yqeI
P54461	Ribosomal RNA small subunit methyltransferase E	rsmE
P54467	Uncharacterized protein YqfB	yqfB
P54484	Cell wall-binding protein YqgA	yqgA
P54491	Uncharacterized protein YqgN	yqgN
P54501	Probable metallo-hydrolase YqgX	yqgX
P54503	Regulatory protein MgsR	mgsR
P54507	Spore coat-associated protein N	tasA
P54511	Octanoyltransferase LipM	lipM
P54512	Transcriptional regulator MntR	mntR
P54517	3-dehydroquinate dehydratase	yqhS
P54518	Uncharacterized peptidase YqhT	yqhT
P54520	N utilization substance protein B homolog	nusB
P54524	Probable NADH-dependent flavin oxidoreductase YqiG	yqiG
P54533	Dihydrolipoyl dehydrogenase	bfmBC
P54535	Arginine-binding extracellular protein ArtP	artP
P54542	Uncharacterized protein YqjE	yqjE
P54547	Glucose-6-phosphate 1-dehydrogenase	zwf
P54550	NADPH dehydrogenase	namA
P54551	Uncharacterized protein YqjN	yqjN
P54555	Probable D-serine dehydratase	dsdA
P54556	Pantothenate kinase	coaA
P54563	Uncharacterized protein YqjZ	yqjZ
P54564	UPF0157 protein YqkA	yqkA
P54568	Uncharacterized protein YqkE	yqkE
P54569	Uncharacterized oxidoreductase YqkF	yqkF
P54571	Malate-2H(+)/Na(+)-lactate antiporter	mleN
P54572	Probable NAD-dependent malic enzyme 1	yqkJ
P54574	Ferric uptake regulation protein	fur
P54585	Uncharacterized MFS-type transporter YhcA	yhcA
P54586	Uncharacterized protein YhcB	yhcB
P54587	Uncharacterized protein YhcC	yhcC
P54592	Uncharacterized ABC transporter ATP-binding protein YhcH	yhcH
P54593	Uncharacterized protein YhcI	yhcI
P54602	Endonuclease YhcR	yhcR
P54616	Enoyl-[acyl-carrier-protein] reductase [NADH] FabI	fabI
P54718	Uncharacterized ABC transporter ATP-binding protein YfiB	yfiB
P54950	Putative monooxygenase YxeK	yxeK
P54952	Probable amino-acid-binding protein YxeM	yxeM
P54953	Probable amino-acid permease protein YxeN	yxeN
P54955	Uncharacterized hydrolase YxeP	yxeP
P54956	Uncharacterized protein YxeQ	yxeQ
P55179	Peptidase T	pepT
P55180	UDP-glucose 4-epimerase	galE
P55192	Uncharacterized protein YbbA	ybbA
P55340	Protein EcsB	ecsB
P55341	Protein EcsC	ecsC
P55343	Transcriptional regulator MraZ	mraZ
P55873	50S ribosomal protein L20	rplT
P55874	50S ribosomal protein L35	rpmI
P56849	50S ribosomal protein L33 1	rpmGA
P68569	SPBc2 prophage-derived disulfide bond formation protein A	bdbA
P70945	DegV domain-containing protein YitS	yitS
P70961	Uncharacterized protein YwmD	ywmD
P70964	Stress response protein CsbD	csbD
P70976	Uncharacterized methyltransferase YbaJ	ybaJ
P70981	Probable aminopeptidase YbaC	ybaC
P70993	Uncharacterized HTH-type transcriptional regulator YwhA	ywhA
P70999	Agmatinase	speB
P71009	Putative ABC transporter ATP-binding protein AlbC	albC
P71014	Uncharacterized protein YuaB	yuaB
P71015	HTH-type transcriptional repressor GbsR	gbsR
P71018	Phosphate acyltransferase	plsX
P71019	Malonyl CoA-acyl carrier protein transacylase	fabD
P71021	Septum site-determining protein DivIVA	divIVA
P71035	Urease subunit beta	ureB
P71037	Uncharacterized protein YwnB	ywnB
P71043	Putative phosphinothricin acetyltransferase YwnH	ywnH
[truncated: 132 more rows]

## Sheet: Regulated Proteins
Significantly regulated proteins (p ≤ 0.05) in the 10 mM ascorbate treatment condition relative to control condition						Significantly regulated proteins (p ≤ 0.05) in the 20 mM ascorbate treatment condition relative to control condition						Significantly regulated proteins (p ≤ 0.05) in the 30 mM ascorbate treatment condition relative to control condition
[truncated: 115 more rows]
